# Supplementary material for: Visible-light-mediated intramolecular radical cyclization of α-brominated amide-tethered alkylidenecyclopropanes
Source: Royal Society of Chemistry journal article supplement (doi:10.1039/d1cc07136j), 2022-01-01
Supplement: d1cc07136j1.pdf [file d1cc07136j1.pdf]

# Support information

## Visible-light mediated intramolecular radical cyclizations of $\alpha$ -brominated amide-tethered alkylidenecyclopropanes

Ben Mao,<sup>a</sup> Xiao-Yu Zhang,<sup>a</sup> Yin Wei,<sup>\*b</sup> and Min Shi<sup>\*a,b</sup>

<sup>a</sup>Key Laboratory for Advanced Materials and Institute of Fine Chemicals, School of Chemistry & Molecular Engineering, East China University of Science and Technology, 130 Meilong Road, Shanghai 200237, China. [weiyin@sioc.ac.cn](mailto:weiyin@sioc.ac.cn), [mshi@mail.sioc.ac.cn](mailto:mshi@mail.sioc.ac.cn).

<sup>b</sup>State Key Laboratory of Organometallic Chemistry, Center for Excellence in Molecular Synthesis, University of Chinese Academy of Sciences, Shanghai Institute of Organic Chemistry, Chinese Academy of Sciences, 345 Lingling Road, Shanghai 200032, China.

### CONTENTS

|                                                             |      |
|-------------------------------------------------------------|------|
| 1. General Remarks. ....                                    | S2   |
| 2. Optimization of Reaction Conditions .....                | S3   |
| 3. General Procedure for the Synthesis of Substrates 1..... | S6   |
| 4. General Procedure for the Synthesis of Products 2. ....  | S10  |
| 5. Mechanistic Studies .....                                | S11  |
| 6. Proposed Reaction Mechanisms .....                       | S15  |
| 7. X-ray data. ....                                         | S19  |
| 8. Characterization Data of Substrates.....                 | S21  |
| 9. Characterization Data of Products. ....                  | S41  |
| 10. Spectroscopic Data of Substrates (NMR Spectrum) .....   | S55  |
| 11. Spectroscopic Data of Products (NMR Spectrum).....      | S90  |
| 12. References.....                                         | S118 |

## 1. General Remarks.

Melting points were determined on a digital melting point apparatus and temperatures were uncorrected. NMR spectra were recorded with a Bruker spectrometer at 400 MHz ( $^1\text{H}$  NMR), 600 MHz ( $^1\text{H}$  NMR), 100 MHz ( $^{13}\text{C}$  NMR), 150 MHz ( $^{13}\text{C}$  NMR) and 564 MHz ( $^{19}\text{F}$  NMR) in  $\text{CDCl}_3$ , respectively. Chemical shift was reported in ppm down field from internal TMS. Infrared spectra were recorded on a Perkin-Elmer PE-983 spectrometer with absorption in  $\text{cm}^{-1}$ . Mass spectra were recorded by ESI, EI and HRMS was measured on a HP-5989 instrument. X-ray structure was determined on a Bruker Smart-1000 X-ray Diffraction meter. Commercially available reagents were used without further purification. Organic solvents used were dried by standard methods when necessary. All reactions were monitored by TLC with Huanghai GF<sub>254</sub> silica gel coated plates. Flash column chromatography was performed by using GENERAL-REAGENT silica gel (300-400 mesh). All reactions were performed under argon using standard Schlenk techniques. The 15 W and 30 W Blue LED (Manufacturer: Liang yuan-Light Factory, Model: PAR 38, Wavelength: 425 nm) was directly purchased from the supermarket.

## 2. Optimization of Reaction Conditions

Table S1 Optimization of Reaction Conditions

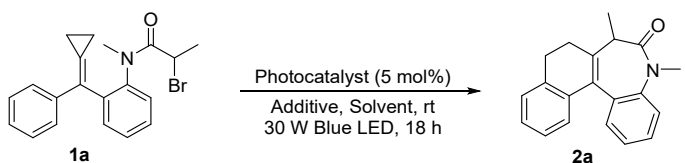

| Entry <sup>a</sup> | Photocatalyst                                                   | Additive (equiv)                     | Solvent            | Yield (%) <sup>b</sup>     |
|--------------------|-----------------------------------------------------------------|--------------------------------------|--------------------|----------------------------|
| 1                  | [Ru(bpy) <sub>3</sub> ](PF <sub>6</sub> ) <sub>2</sub>          | Et <sub>3</sub> N (4.0)              | CH <sub>3</sub> CN | 38                         |
| 2                  | [Ir(dF(CF <sub>3</sub> )ppy) <sub>2</sub> (ppy)]PF <sub>6</sub> | Et <sub>3</sub> N (4.0)              | CH <sub>3</sub> CN | 36                         |
| 3                  | 4CzIPN                                                          | Et <sub>3</sub> N (4.0)              | CH <sub>3</sub> CN | 65                         |
| 4                  | Ir(ppy) <sub>3</sub>                                            | Et <sub>3</sub> N (4.0)              | CH <sub>3</sub> CN | 50                         |
| 5                  | 4CzIPN                                                          | TMEDA (4.0)                          | CH <sub>3</sub> CN | 30                         |
| 6                  | 4CzIPN                                                          | DIPEA (4.0)                          | CH <sub>3</sub> CN | 40                         |
| 7                  | 4CzIPN                                                          | K <sub>2</sub> CO <sub>3</sub> (4.0) | CH <sub>3</sub> CN | NR                         |
| 8                  | 4CzIPN                                                          | Et <sub>3</sub> N (4.0)              | DCE                | 51                         |
| 9                  | 4CzIPN                                                          | Et <sub>3</sub> N (4.0)              | Dioxane            | 58                         |
| <b>10</b>          | <b>4CzIPN</b>                                                   | <b>Et<sub>3</sub>N (4.0)</b>         | <b>DME</b>         | <b>72 (62)<sup>c</sup></b> |
| 11                 | 4CzIPN                                                          | Et <sub>3</sub> N (4.0)              | THF                | 69                         |
| 12                 | 4CzIPN                                                          | Et <sub>3</sub> N (4.0)              | DCM                | 33                         |
| 13                 | 4CzIPN                                                          | Et <sub>3</sub> N (4.0)              | acetone            | 55                         |
| 14                 | 4CzIPN                                                          | Et <sub>3</sub> N (10.0)             | DME                | 42                         |
| 15                 | 4CzIPN                                                          | Et <sub>3</sub> N (2.0)              | DME                | 61                         |
| 16 <sup>d</sup>    | —                                                               | Et <sub>3</sub> N (4.0)              | DME                | NR                         |
| 17 <sup>e</sup>    | 4CzIPN                                                          | Et <sub>3</sub> N (4.0)              | DME                | NR                         |
| 18 <sup>f</sup>    | 4CzIPN                                                          | —                                    | DME                | NR                         |

<sup>a</sup>Reaction conditions: **1a** (0.1 mmol, 1.0 equiv), photocatalyst (0.005 mmol, 5.0 mol%) and additive (0.4 mmol, 4.0 equiv) were placed in a reaction tube and Ar was charged. Then 1.0 mL solvent was added and the mixture was stirred exposing to blue LED light (30 W) at room temperature for 18 h. <sup>b</sup>Yields were determined by <sup>1</sup>H NMR using 1,3,5-trimethoxybenzen as an internal standard. <sup>c</sup>Isolated yield on 0.2 mmol scale. <sup>d</sup>Reaction was conducted in the absence of photocatalyst. <sup>e</sup>Reaction was conducted in the absence of light source. <sup>f</sup>Reaction was conducted in the absence of additive.

To get **2a** in higher yield, we tried to optimize the reaction conditions and the selected results are shown in Table S1. The photocatalysts with different reduction potentials were employed in the reaction system along with utilizing Et<sub>3</sub>N as an additive and CH<sub>3</sub>CN as solvent and we found that these photocatalysts could promote the reaction smoothly and the organophotocatalyst 4CzIPN gave the best result, affording **2a** in 65% yield (Table S1, entries 1-4, for more information see Table S2). Next, the other alkyl amines such as TMEDA (*N,N,N',N'*-tetramethylethylenediamine) and DIPEA (*N,N*-diisopropylethylamine) were used in this reaction, furnishing **2a** in 30% and 40% yields, respectively (Table S1, entries 5 and 6). The use of inorganic base K<sub>2</sub>CO<sub>3</sub> as additive failed to afford **2a**, indicating that aminoalkyl radical generated from alkyl amine played the key role in this XAT promoted intramolecular cyclization reaction (Table S1, entry 7). The evaluation of solvent effects displayed that DME

(1,2-dimethoxyethane) was the solvent of choice, providing the desired product **2a** in 72% yield (Table S1, entries 8-13). Decreasing the amount of Et<sub>3</sub>N to 2.0 equivalents (Table S1, entry 15) or increasing to 10.0 equivalents (Table S1, entry 14) were both conducive, however, giving **2a** in lower yield. The control experiments demonstrated that the reaction cannot proceed in the absence of photocatalyst, light source irradiation or Et<sub>3</sub>N (Table S1, entries 16-18).

**Table S2** Screening of optimal photocatalyst

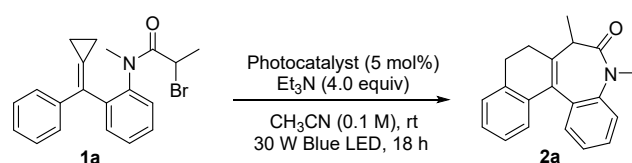

| entry <sup>a</sup> | Photocatalyst                                                                        | E (PC <sup>+</sup> /PC <sup>*</sup> ) | E (PC/PC <sup>-</sup> ) | <b>2a</b> yield <sup>e</sup> (%) |
|--------------------|--------------------------------------------------------------------------------------|---------------------------------------|-------------------------|----------------------------------|
| 1                  | 4CzIPN                                                                               | -1.04 V                               | -1.21 V                 | 65                               |
| 2                  | [Ir(dF(CF <sub>3</sub> )ppy) <sub>2</sub> (dtbpy)]PF <sub>6</sub>                    | -0.89 V                               | -1.37 V                 | 55                               |
| 3                  | [Ir(dF(Me)ppy) <sub>2</sub> (dtbbpy)]PF <sub>6</sub>                                 | -0.92 V                               | -1.44 V                 | 23                               |
| 4                  | [Ru(bpy) <sub>3</sub> ](PF <sub>6</sub> ) <sub>2</sub>                               | -0.81 V                               | -1.33 V                 | 38                               |
| 5                  | [Ir(dF(CF <sub>3</sub> )ppy) <sub>2</sub> (bpy)]PF <sub>6</sub>                      | -1.00 V                               | -1.37 V                 | 36                               |
| 6                  | Fluorescein <sup>d</sup>                                                             | -1.55 V                               | -1.22 V                 | 44                               |
| 7                  | Ir(ppy) <sub>3</sub>                                                                 | -1.73 V                               | -2.19 V                 | 50                               |
| 8                  | [Ir(dtbbpy)(ppy) <sub>2</sub> ]PF <sub>6</sub>                                       | -0.96 V                               | -1.51 V                 | 42                               |
| 9                  | [Ir(dF(CF <sub>3</sub> )ppy) <sub>2</sub> (5,5'-CF <sub>3</sub> bpy)]PF <sub>6</sub> | -0.69 V                               | -0.43 V                 | 29                               |
| 10 <sup>b</sup>    | 4CzIPN                                                                               | -1.04 V                               | -1.21 V                 | 63                               |
| 11 <sup>c</sup>    | 4CzIPN                                                                               | -1.04 V                               | -1.21 V                 | 62                               |

<sup>a</sup>Reaction conditions: **1a** (0.1 mmol, 1.0 equiv), photocatalyst (0.005 mmol, 5.0 mol%) and Et<sub>3</sub>N (0.4 mmol, 4.0 equiv) were placed in a reaction tube and Ar was charged. Then 0.5 mL solvent was added and the mixture was stirred exposing to blue LED light (30 W) at room temperature for 18 h. <sup>b</sup>15 W Blue LED was used. <sup>c</sup>The reaction time is 24 h. <sup>d</sup>The value of redox potentials here taken that of Fluorescein Na salt due to 4.0 equivalents of Et<sub>3</sub>N were used. <sup>e</sup>Yields were determined by <sup>1</sup>H NMR using 1,3,5-trimethoxybenzen as an internal standard.

In this intramolecular cyclization reaction, all the photocatalysts used can provide the final product. However, when comparing the reduction potentials of **1a** ( $E_{\text{red}} = -1.57$  V vs SCE, see Cyclic Voltammetry Experiments below) with the involved photocatalysts except for Ir(ppy)<sub>3</sub> (entry 7), the direct SET (single electron transfer) process could not proceed between the photocatalyst and the substrata **1a**. This result indicates that the mechanism of the cascade reaction involves a XAT (halogen atom transfer) process, which is in accordance with the previously reported conclusion.<sup>1</sup> All the data of reduction potentials in the excited and reduced state of photocatalyst are referred to the previous literature.<sup>2-7</sup>

**Table S3** Screening of optimal additive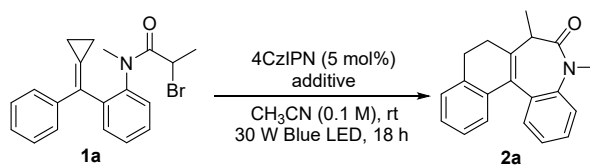

| <sup>a</sup> entry | additive (equiv)                     | yield <sup>b</sup> (%) |
|--------------------|--------------------------------------|------------------------|
| 1                  | K <sub>2</sub> CO <sub>3</sub> (2.0) | NR                     |
| 2                  | DABCO (2.0)                          | NR                     |
| 3                  | pyridine (4.0)                       | trace                  |
| 4                  | TBAF (4.0)                           | NR                     |
| 5                  | DIPA (4.0)                           | 49                     |
| 6                  | DIPEA (4.0)                          | 40                     |
| 7                  | TMEDA (4.0)                          | 30                     |
| 8                  | Et <sub>3</sub> N (2.0)              | 61                     |
| 9                  | Et <sub>3</sub> N (4.0)              | 65                     |
| 10                 | Et <sub>3</sub> N (6.0)              | 63                     |
| 11                 | Et <sub>3</sub> N (10.0)             | 42                     |

<sup>a</sup>Reaction conditions: **1a** (0.1 mmol, 1.0 equiv), 4CzIPN (0.005 mmol, 5.0 mol%) and additive were placed in a reaction tube and Ar was charged. Then 0.5 mL solvent was added and the mixture was stirred exposing to blue LED light (30 W) at room temperature for 18 h. <sup>b</sup>Yields were determined by <sup>1</sup>H NMR using 1,3,5-trimethoxybenzen as an internal standard.

**Table S4** Screening of optimal solvent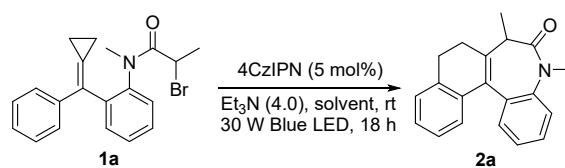

| entry <sup>a</sup> | solvent           | <b>2a</b> yield <sup>c</sup> (%) |
|--------------------|-------------------|----------------------------------|
| 1                  | DCM               | 33                               |
| 2                  | DMSO              | 32                               |
| 3                  | DCE               | 51                               |
| 4                  | Dioxane           | 58                               |
| 5                  | EtOAc             | 52                               |
| 6                  | THF               | 69                               |
| 7                  | acetone           | 55                               |
| 8                  | Et <sub>2</sub> O | 40                               |
| <b>9</b>           | <b>DME</b>        | <b>72(62)<sup>d</sup></b>        |
| 10                 | EtOH              | 42                               |
| 11 <sup>b</sup>    | DME               | 71                               |

<sup>a</sup>Reaction conditions: **1a** (0.1 mmol, 1.0 equiv), 4CzIPN (0.005 mmol, 5.0 mol%) and Et<sub>3</sub>N (0.4 mmol, 4.0 equiv) were placed in a reaction tube and Ar was charged. Then 0.5 mL solvent was added and the mixture was stirred exposing to blue LED light (30 W) at room temperature for 18 h. <sup>b</sup>6.0 equiv Et<sub>3</sub>N instead. <sup>c</sup>Yields were determined by <sup>1</sup>H NMR using 1,3,5-trimethoxybenzen as an internal standard. <sup>d</sup>Isolated yield on 0.2 mmol

### 3. General Procedure for the Synthesis of Substrates 1.

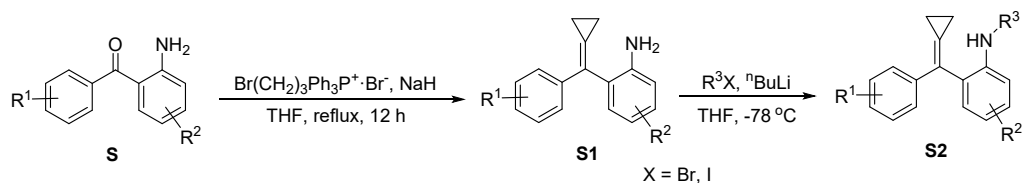

#### Method A

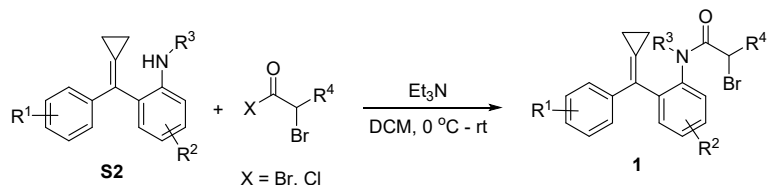

#### Method B

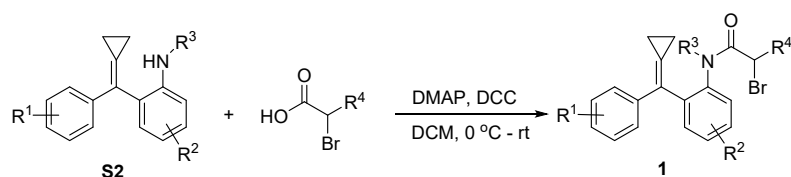

Compound **S1** and procedure for the synthesis of substrates **1** was modified according to the previous literature.<sup>8</sup>

A solution of 3-bromopropyltriphenylphosphonium bromide (5.57 g, 13 mmol) and NaH (60% in oil, 0.96 g, 24 mmol) in THF (30 mL) was stirred at 65 °C in an oil bath under Ar for 4 h. Afterwards compound **S** (10 mmol) in THF (10 mL) was added and the reaction solution was stirred at 65 °C in an oil bath for another 8 h. Upon completion, the reaction was cooled to room temperature and the mixture was filtered through a celite. The filtrate was concentrated under reduced pressure and the residue was purified by a silica gel flash chromatography (PE/EA = 40/1) to afford the products **S1** in moderate yields.

A solution of compound **S1** (2.0 mmol) in THF (20 mL) was stirred at -78 °C under Ar, <sup>n</sup>BuLi (2.0 mmol) was added dropwise for 20 min by a syringe pump. Upon completion, the reaction system continued to be stirred at -78 °C for another 20 minutes, then R<sup>3</sup>X was injected in one portion and the temperature of the reaction system gradually was warmed to room temperature. The reaction was quenched by water after 2 h and extracted with EtOAc for 3 times. The combined organic layer was washed with brine and dried over anhydrous Na<sub>2</sub>SO<sub>4</sub>. The solvent was removed under reduced pressure and the residue was purified by a flash column chromatography on silica gel (PE/EA = 10/1) to afford the compounds **S2** in high yields.

## Method A

A solution of compound **S2** (1.0 equiv) in DCM (10 mL) was stirred at 0 °C in an ice bath under Ar. Then Et<sub>3</sub>N (1.5 equiv) and the corresponding acyl chloride or acyl bromide (1.2 equiv) were added respectively. The reaction system was warmed to room temperature 1 h later and the mixture was reacted for another 2 h. The solvent was removed under reduced pressure and the residue was purified by a flash column chromatography on silica gel (PE/EA = 10/1) to afford the substrates **1a - 1v**, **1x** and **1y** in high yields.

## Method B

A solution of compound **S2** (2.0 mmol), the corresponding carboxylic acid (2.0 mmol) and 4-dimethylaminopyridine (0.1 mmol) in DCM (10 mL) was stirred at 0 °C in an ice bath for 10 min. Afterwards, the solution of dicyclohexylcarbodiimide (2.2 mmol) in DCM (5 mL) was added dropwise for 15 min. The reaction system was warmed to room temperature and stirred overnight. Upon completion, the mixture was filtered through a celite. The filtrate was concentrated under reduced pressure and the residue was purified by a silica gel flash chromatography (PE/EA = 10/1) to afford the products **1z**, **1aa** and **1ac - 1af** in moderate to high yields.

## Synthesis of substrate **1w**

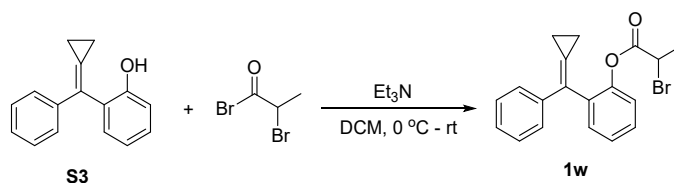

Compound **S3** was prepared from (2-hydroxyphenyl)(phenyl)methanone and the procedure was the same as the way mentioned above.

A solution of compound **S3** (1.0 equiv) in DCM (10 mL) was stirred at 0 °C in an ice bath under Ar. Then Et<sub>3</sub>N (1.5 equiv) and the corresponding acyl bromide (1.2 equiv) were added respectively. The reaction system was warmed to room temperature after 1 h later and the reaction mixture was stirred for another 2 h. The solvent was removed under reduced pressure

and the residue was purified by a flash column chromatography on silica gel (PE/EA = 10/1) to afford the substrate **1w** (580 mg, 81% yield).

### Synthesis of substrate **1ab**

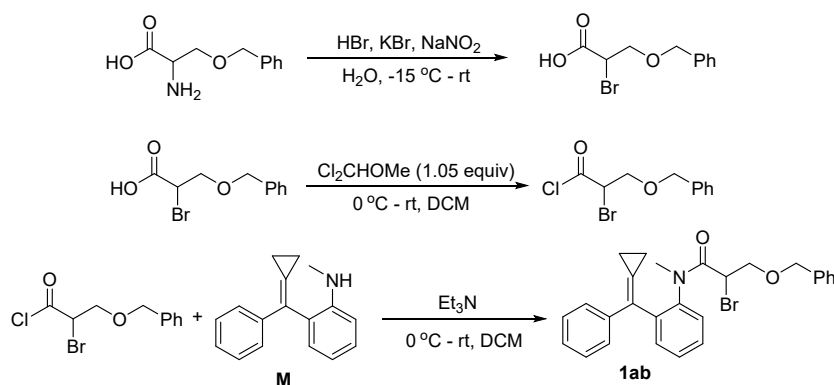

A solution of *O*-benzylserine (1.95 g, 10.0 mmol, 1.0 equiv), HBr (48% solution, 2.5 mL) and KBr (4.04 g, 34 mmol, 3.4 equiv) in water (10 mL) was stirred at -15 °C for 10 min. Then the solution of NaNO<sub>2</sub> (0.86 g, 12.5 mmol, 1.25 equiv) in water (5 mL) was added dropwise for 20 min by a syringe pump. After the addition, the reaction system was slowly warmed up to room temperature and the reaction mixture was stirred for another 3 hours. Upon completion, the solution was extracted with Et<sub>2</sub>O for three times. The combined organic layers were dried over Na<sub>2</sub>SO<sub>4</sub>, filtered and concentrated under reduced pressure to afford 3-(benzyloxy)-2-bromopropanoic acid (2.26 g, 8.7 mmol, 87% yield) as a pale yellow oil, which was used for the next reaction without further purification.<sup>9</sup>

To an oven dried 50 mL round-bottom flask equipped with a magnetic stir bar, 3-(benzyloxy)-2-bromopropanoic acid (518 mg, 2.0 mmol, 1.0 equiv) and DCM (5 mL) were added and the mixture was stirred in an ice bath for 10 min, Cl<sub>2</sub>CHOMe (0.19 mL, 2.1 mmol, 1.05 equiv) was injected into the solution slowly and was stirred for another 1 h.<sup>10</sup> Afterwards, the mixture was transferred into the solution of compound **M** (471 mg, 2.0 mmol, 1.0 equiv) and Et<sub>3</sub>N (3.0 mmol, 1.5 equiv) in DCM and the resulting mixture was stirred overnight. The reaction was quenched by water and extracted with DCM for 3 times. The combined organic layer was washed with brine and dried over anhydrous Na<sub>2</sub>SO<sub>4</sub>. The solvent was removed



under reduced pressure and the residue was purified by a flash column chromatography on silica gel (PE/EA = 10/1) to afford the substrate **1ab** (423 mg, 44% yield).

#### 4. General Procedure for the Synthesis of Products 2.

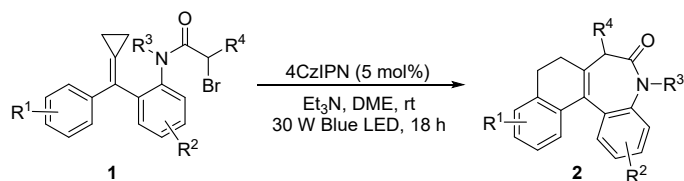

In an flame dried Schlenk tube (20 mL) equipped with a magnetic stir bar, substrate **1** (0.2 mmol) and photocatalyst 4CzIPN (0.01 mmol, 5 mol%) were added. The tube was degassed by alternating vacuum evacuation (10 min) and argon backfill for three times. Et<sub>3</sub>N (0.8 mmol, 4.0 equiv) and degassed DME (2.0 mL, 0.1 M) were injected into the tube sequentially. The mixture was placed 5 cm away from the blue LED (30 W) and stirred for 18 h at room temperature. Upon completion, EtOAc (5 mL) was added into the tube to dilute the mixture.

## 5. Mechanistic Studies

### 5.1 Radical Trapping Experiment

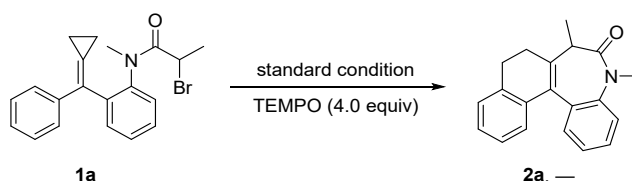

In an flame dried Schlenk tube (20 mL) equipped with a magnetic stir bar, substrate **1a** (0.2 mmol), photocatalyst 4CzIPN (0.01 mmol, 5 mol%) and TEMPO (0.8 mmol, 4.0 equiv) were added. The tube was degassed by alternating vacuum evacuation (10 min) and argon backfill for three times. Et<sub>3</sub>N (0.8 mmol, 4.0 equiv) and degassed DME (2 mL, 0.1 M) were injected into the tube sequentially. The mixture was placed 5 cm away from the blue LED (30 W) and stirred for 18 h at room temperature. Upon completion, 1,3,5-trimethoxybenzene (0.1 mmol, 0.5 equiv) as an internal standard was added into the tube, then EtOAc (5 mL) was added to dilute the mixture. The mixture was concentrated in *vacuo* and the yield of product **2a** was determined by <sup>1</sup>H NMR spectroscopy.

### 5.2 Sub-stoichiometry amount of Et<sub>3</sub>N with additional base used Experiment

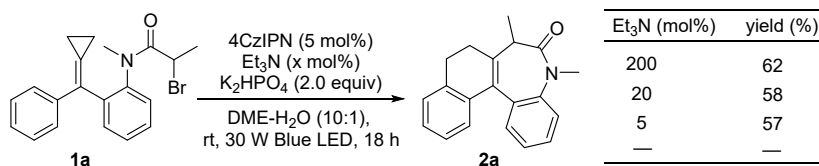

In four Schlenk tubes (20 mL) equipped with magnetic stir bars, substrate **1a** (0.1 mmol), photocatalyst 4CzIPN (0.005 mmol, 5 mol%) and K<sub>2</sub>HPO<sub>4</sub> (0.4 mmol, 4.0 equiv) were added into each tube. The tube was degassed by alternating vacuum evacuation (10 min) and argon backfill for three times. Then different amount of Et<sub>3</sub>N (200 mol%), Et<sub>3</sub>N (20 mol%), Et<sub>3</sub>N (5 mol%), Et<sub>3</sub>N (—) were added into tubes, respectively. Degassed DME (2 mL) and H<sub>2</sub>O (0.2 mL) were injected into the tube sequentially. The mixture was placed 5 cm away from the blue LED (30 W) and stirred for 18 h at room temperature. Upon completion, 1,3,5-trimethoxybenzene (0.1 mmol) as an internal standard was added into the tube, then EtOAc (5

mL) was added to dilute the mixture. The mixture was concentrated in *vacuo* and the yield of product **2a** was determined by <sup>1</sup>H NMR spectroscopy.

For the catalytic use of Et<sub>3</sub>N (5 mol%) combine with inorganic base, theoretically the final product should be obtained in a maximum yield of 15% if every molecular of Et<sub>3</sub>N promoted XAT process up to 3. The final product was obtained in 57% yield under this condition, however, indicating other species responsible for cleavage of the C-halogen bond existed in the reaction. Additionally, the requirement of simultaneous oxidation of 4CzIPN<sup>•-</sup> and the intermediate **III** (see proposed mechanism in scheme 6) would generate the redox imbalance. Hence, a radical chain process should exist in the reaction, where α-aminoalkyl radicals acting as initiators.<sup>11</sup> Thus, the catalytic amount of Et<sub>3</sub>N can initiate the reaction and the inorganic bases probably play as auxiliary bases for deprotonation of intermediate **IV** shown in Scheme 6. Besides, considering radical intermediate **III** was an electron-rich species and in a conjugated system, it probably underwent a XAT or SET event with substrate **1a** to afford **2a** along with the regeneration of intermediate **I**.

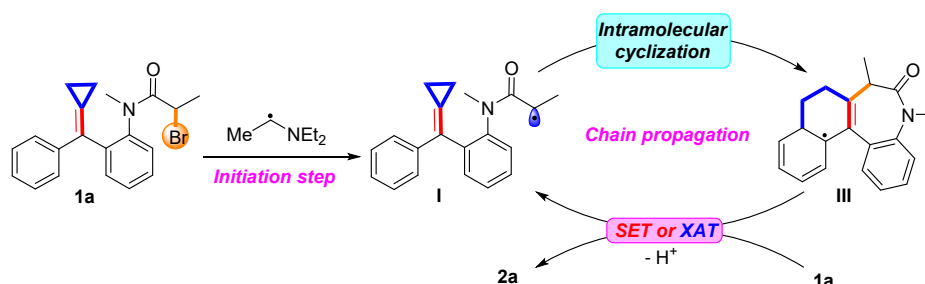

**Figure S1.** Proposed radical chain process.

### 5.3 Emission Quenching Studies<sup>12</sup>

All the emission intensities were recorded by Varian Cary Eclipse spectrometer. Solutions of 4CzIPN ( $2 \times 10^{-5}$  M) in dry DME were excited at 372 nm and the emission intensity was collected at 527 - 528 nm. Solutions of different concentration of Et<sub>3</sub>N and substrate **1i** (white solid, highest yield among all the substrates) were prepared respectively and introduced to a 1 cm path length quartz cuvette equipped with a Teflon® septum.

For the Et<sub>3</sub>N:  $y = 364.07x + 0.9983$ ,  $R^2 = 0.9938$ ;

For the substrate **1i**:  $y = 21.74x + 1.0025$ ,  $R^2 = 0.9800$ ;

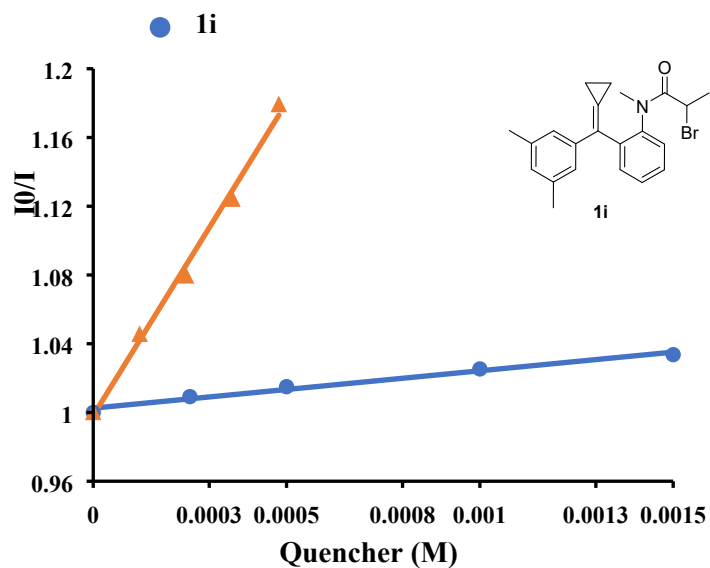

Figure S2.

#### 5.4 Cyclic Voltammetry Experiments

Cyclic Voltammetry was performed on a CH Instruments Electrochemical Workstation model CS350H. A solution of the substrate **1a** in MeCN (0.001 M) was tested with 0.1 M Bu<sub>4</sub>NPF<sub>6</sub> as the supporting electrolyte, using a glassy carbon as the working electrode, a Pt as the counter electrode, and a saturated calomel electrode reference electrode. Ar was bubbled into the system for 20 min to degas the solution. Scan rate = 0.1 V/s, 2 sweep segments, a sample interval of 0.001 V.

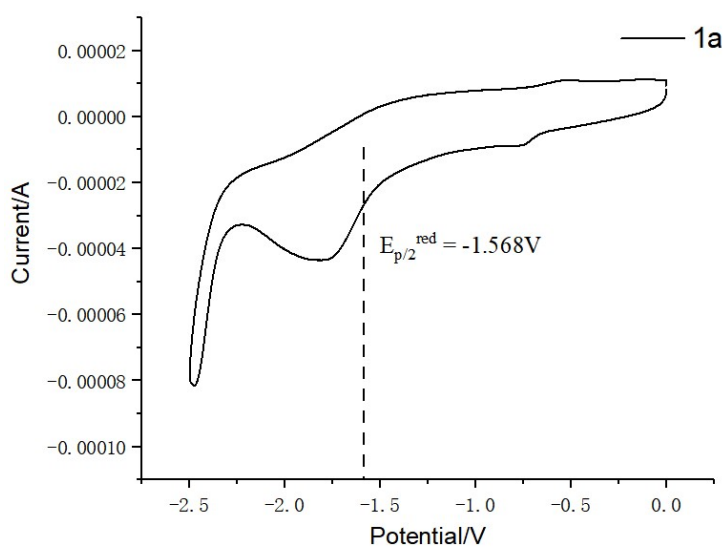

Figure S3.  
S13

## 5.5 Quantum Yield Determination <sup>13</sup>

To further investigate the mechanism of the reactions, we employed the model reaction of **1a** to **2a** to measure the quantum yield.

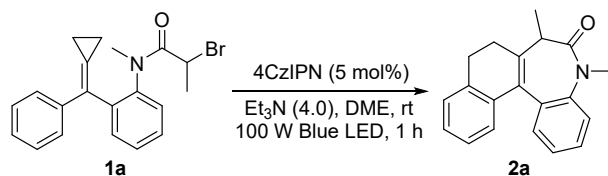

A cuvette equipped with a magnetic stir bar was added substrate **1a** (0.1 mmol), Et<sub>3</sub>N (0.4 mmol) and dry 1,2-dimethoxyethane (2.0 mL). After which, 4CzIPN (0.005 mmol) was added at room temperature. The heterogeneous mixture was degassed by bubbling argon for 20 min and placed at a distance (app. 5 cm) from 100 W Blue LED for 1 h, The reaction mixture was concentrated in *vacuo* and analyzed by <sup>1</sup>H NMR spectrum using CH<sub>2</sub>Br<sub>2</sub> as an internal standard. The quantum yield is calculated to be 0.26.

$$\phi = \frac{n_x}{n_p} = \frac{n_x}{\frac{\Delta E \times S \times t}{N_A h \nu}} = \frac{n_x \times N_A \times h \times c}{\Delta E \times S \times t \times \lambda}$$
$$= \frac{0.045 \times 10^{-3} \text{ mol} \times 6.022 \times 10^{23} \times 6.626 \times 10^{-34} \text{ J} \cdot \text{s} \times 2.998 \times 10^8 \text{ m} \cdot \text{s}^{-1}}{(7.0 \times 10^{-3} \text{ W} \cdot \text{cm}^{-2} \times 2 \text{ cm}^2) \times 3600 \text{ s} \times 415 \times 10^{-9} \text{ m}} = 0.26$$

$n_x$  is the amount of photochemical or photophysical events  $x$  occurred during irradiation,  $n_p$  is the number of photons absorbed by the reactant.  $E$  is the radiant power.  $S$  is the irradiated area: 2 cm<sup>2</sup>;  $t$  is the irradiated time: 3600 s;  $N_A$  is the Avogadro constant:  $6.022 \times 10^{23}$ /mol;  $h$  is the Planck constant:  $6.626 \times 10^{-34}$  J · s;  $\nu$  is the frequency of incident light;  $c$  is velocity of light  $2.998 \times 10^8$  m/s).  $\lambda$  is the wavelength: 415 nm;  $n_x$  was analyzed by <sup>1</sup>H NMR,  $\Delta E$  was measured by ILT1400 Portable Radiometer/Photometer.

The quantum yield expected to be > 1 in chain process, however, we still cannot exclude the possible radical chain mechanism of this reaction considering the factors of existence of inefficient initiation step or short-lived chains.<sup>14</sup>

## 6. Proposed Reaction Mechanisms

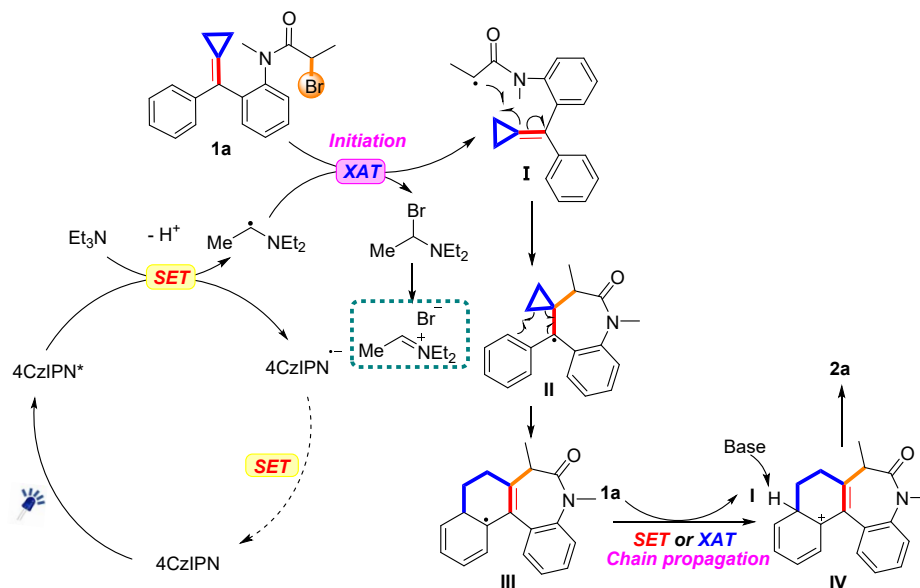

**Figure S4.** Proposed mechanism for the production of **2a**.

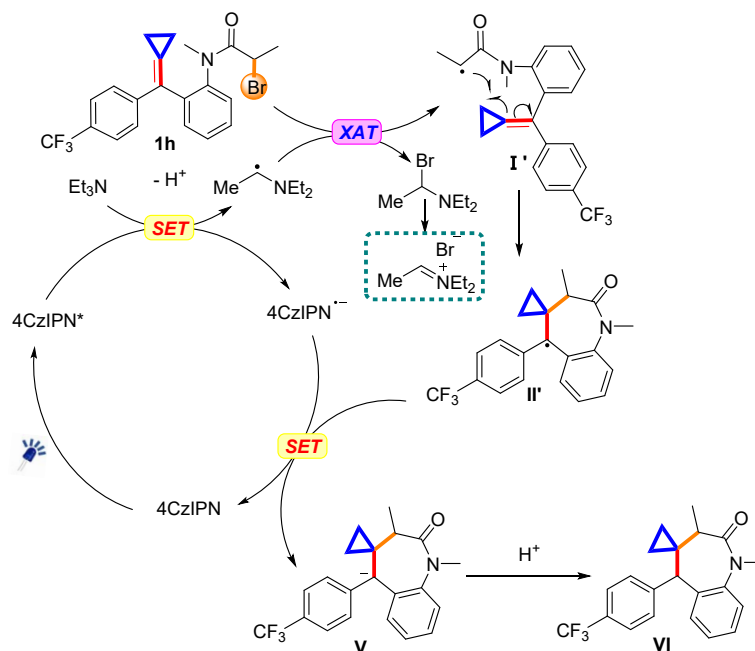

**Figure S5.** Proposed mechanism for the production of three-membered ring unopened by-product.

In this intramolecular radical cyclization, impurities with regular chemical shifts were found in the <sup>1</sup>H NMR (see spectra of **2h** and **2j** taken as examples shown below). We speculated it could be the three-membered ring unopened by-product and proposed a plausible mechanism for the by-product (Figure S5, substrate **1h** was taken as an example). The intermediate **II** possibly underwent a SET event with **4CzIPN<sup>-</sup>** to provide the anionic intermediate **V**, which

afforded the by-product **VI** via protonation. Notably, presumably due to the similar polarity and molecular weight, it was hard to separate these two kinds of compounds.

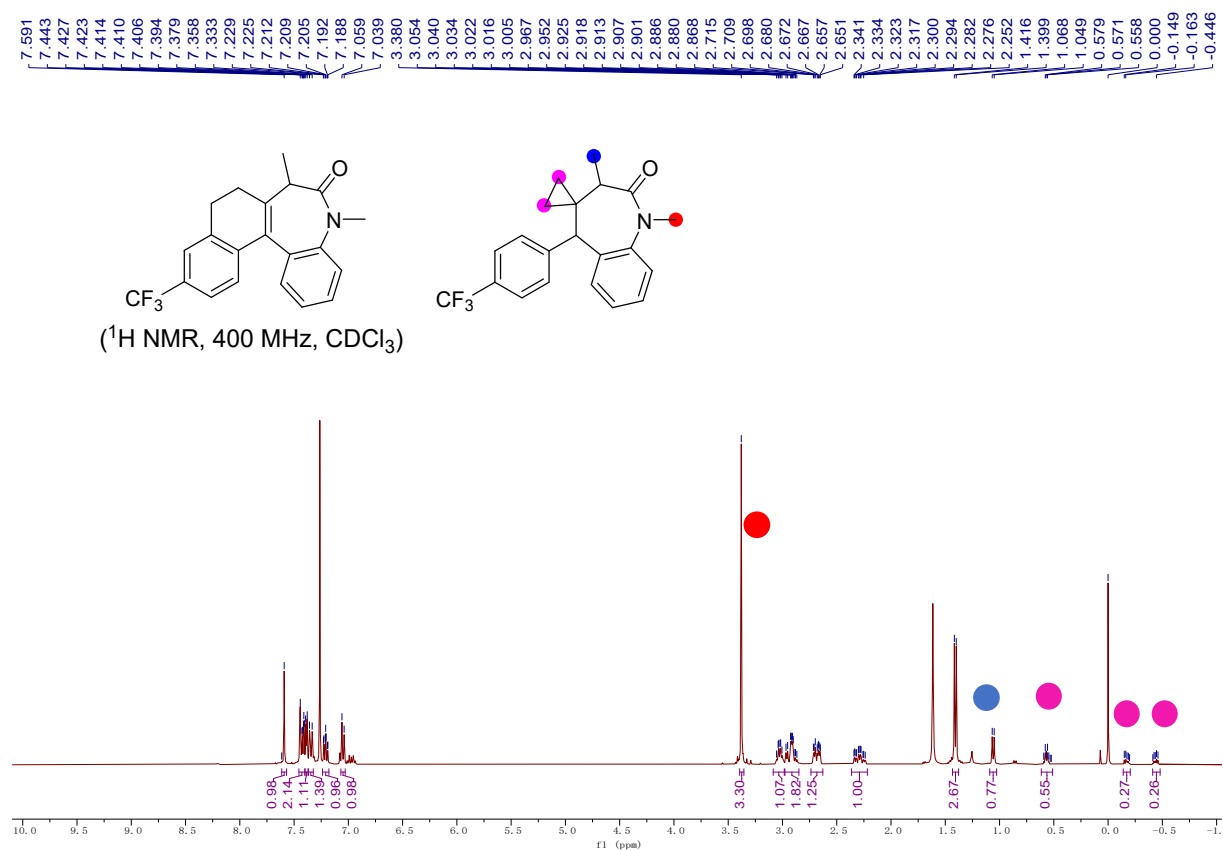



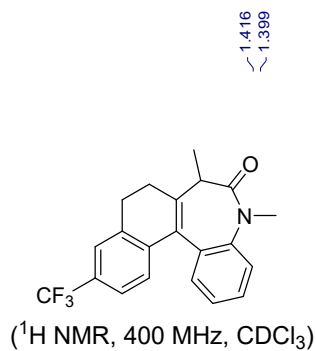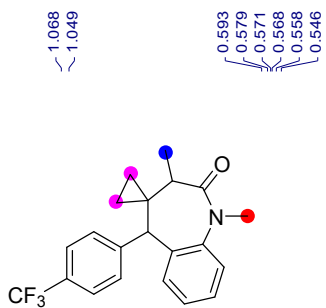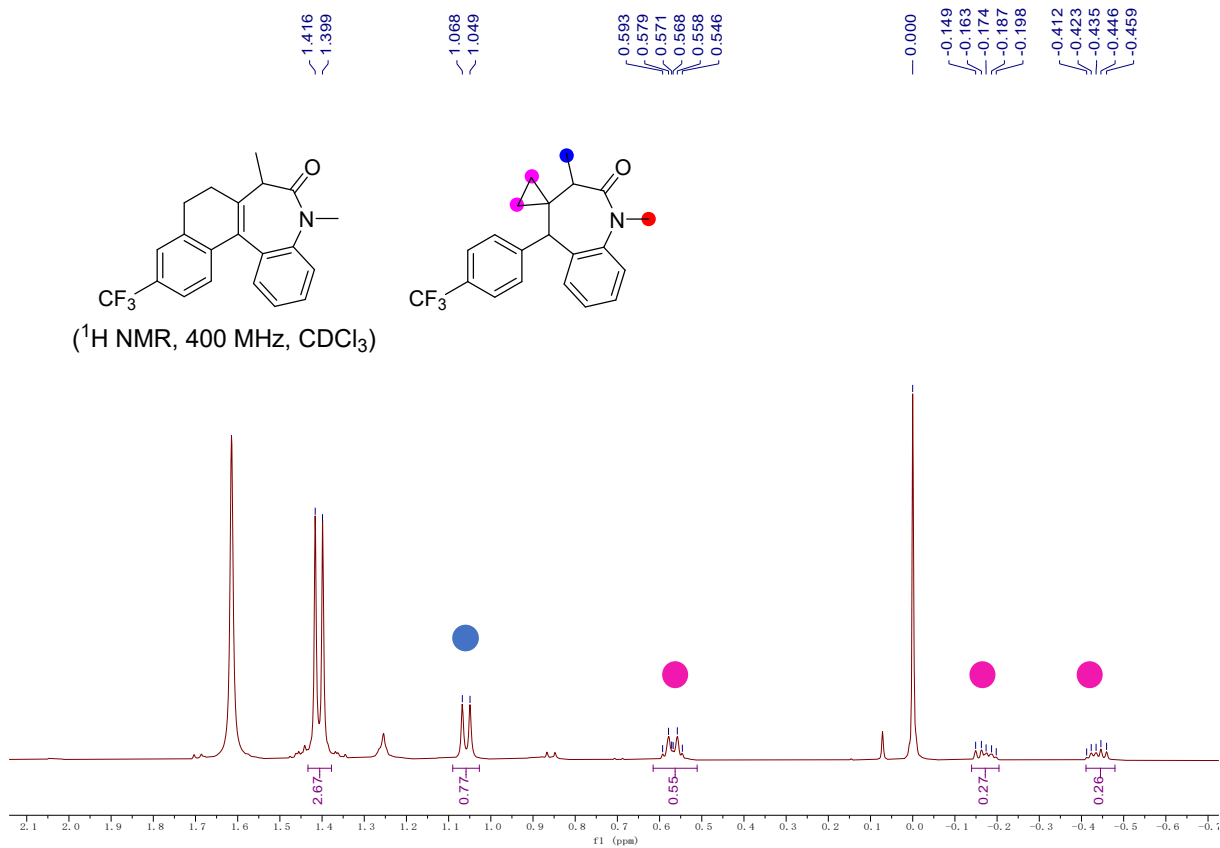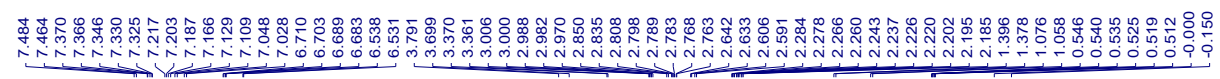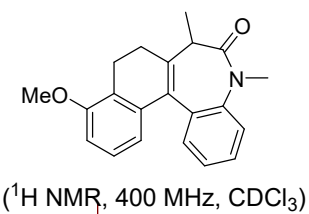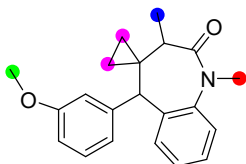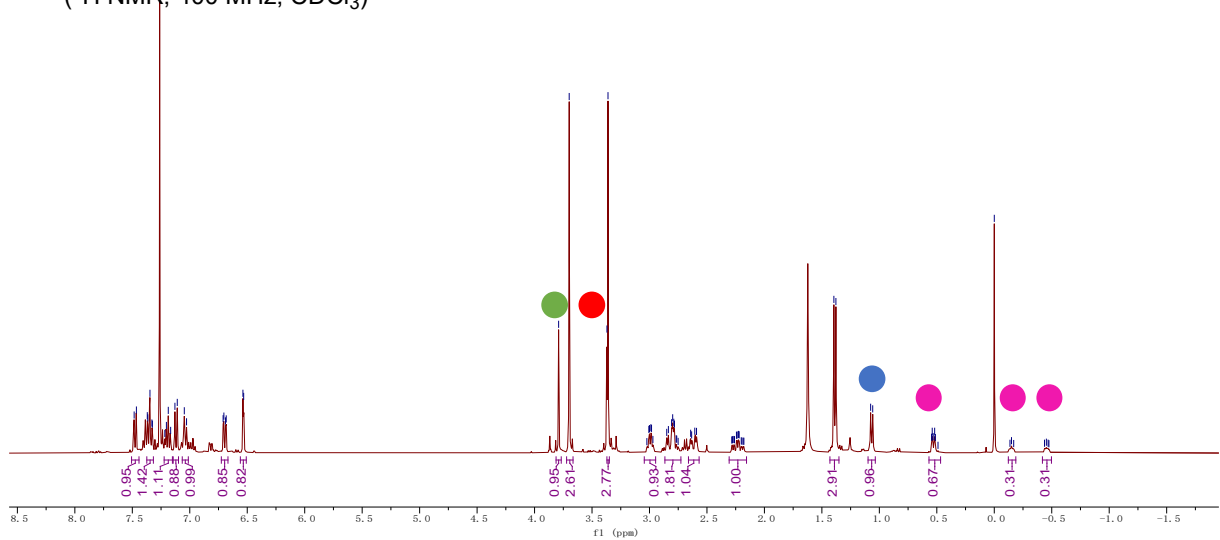

2.850  
2.835  
2.808  
2.798  
2.789  
2.783  
2.768  
2.763  
2.751  
2.642  
2.633  
2.606  
2.591  
2.284  
2.278  
2.266  
2.260  
2.243  
2.237  
2.226  
2.220  
2.202  
2.195  
2.185  
2.179  
1.396  
1.378  
1.076  
1.058

0.546  
0.540  
0.535  
0.525  
0.519  
0.512  
0.490

-0.000  
-0.137  
-0.150  
-0.169

-0.437  
-0.453  
-0.468  
-0.475

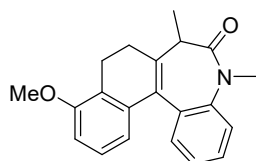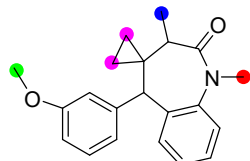

$^1\text{H NMR}$ , 400 MHz,  $\text{CDCl}_3$

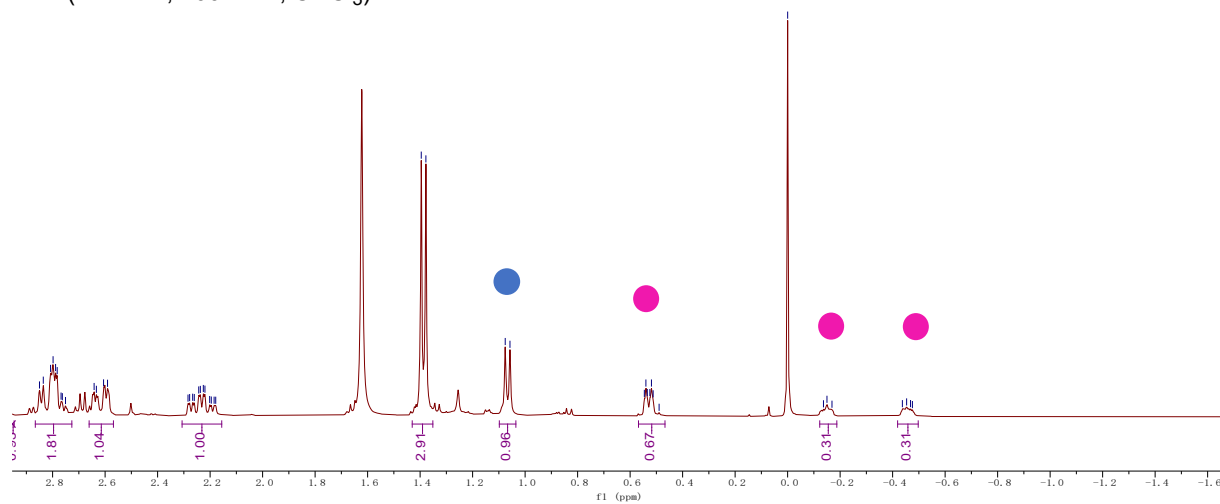

## 7. X-ray data.

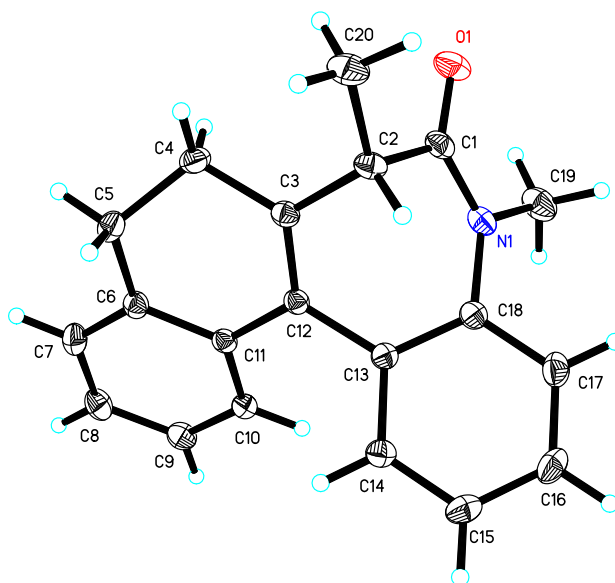

Single crystals of **2a** were grown in EtOH and hexanes. EtOH (2.0 mL) was added to **2a** (29 mg in a 4 mL vial) followed by hexanes (0.5 mL). The 4 mL vial was capped with a needle and placed at room temperature in the experimental cabinet for 2 weeks, whereupon the crystals were formed.

The crystal data of **2a** have been deposited in CCDC with number 2082928. Empirical Formula: C<sub>20</sub>H<sub>19</sub>NO; Formula Weight: 289.36; Crystal Color, Habit: colorless, Crystal Dimensions: 0.200 x 0.150 x 0.130mm; Crystal System: Orthorhombic; Lattice Parameters: a = 9.2952(3)Å, b = 15.1908(6)Å, c = 21.6017(8)Å,  $\alpha = 90^\circ$ ,  $\beta = 90^\circ$ ,  $\gamma = 90^\circ$ , V = 3050.19(19)Å<sup>3</sup>; Space group: P b c a; Z = 8;  $D_{calc} = 1.260$  g/cm<sup>3</sup>; F<sub>000</sub> = 1232; Final R indices [I > 2σ(I)]: R1 = 0.0370; wR2 = 0.0909.

**Table S5. Crystal data and structure refinement for 2a.**

|                                   |                                                                                                   |
|-----------------------------------|---------------------------------------------------------------------------------------------------|
| Empirical formula                 | C <sub>20</sub> H <sub>19</sub> NO                                                                |
| Formula weight                    | 289.36                                                                                            |
| Temperature                       | 213(2) K                                                                                          |
| Wavelength                        | 0.71073 Å                                                                                         |
| Crystal system                    | Orthorhombic                                                                                      |
| Space group                       | P b c a                                                                                           |
| Unit cell dimensions              | a = 9.2952(3) Å      α = 90°.<br>b = 15.1908(6) Å      β = 90°.<br>c = 21.6017(8) Å      γ = 90°. |
| Volume                            | 3050.19(19) Å <sup>3</sup>                                                                        |
| Z                                 | 8                                                                                                 |
| Density (calculated)              | 1.260 Mg/m <sup>3</sup>                                                                           |
| Absorption coefficient            | 0.077 mm <sup>-1</sup>                                                                            |
| F(000)                            | 1232                                                                                              |
| Crystal size                      | 0.200 x 0.150 x 0.130 mm <sup>3</sup>                                                             |
| Theta range for data collection   | 2.737 to 25.998°.                                                                                 |
| Index ranges                      | -11 ≤ h ≤ 11, -18 ≤ k ≤ 16, -26 ≤ l ≤ 23                                                          |
| Reflections collected             | 14282                                                                                             |
| Independent reflections           | 2976 [R(int) = 0.0275]                                                                            |
| Completeness to theta = 25.242°   | 99.2 %                                                                                            |
| Absorption correction             | Semi-empirical from equivalents                                                                   |
| Max. and min. transmission        | 0.7456 and 0.6646                                                                                 |
| Refinement method                 | Full-matrix least-squares on F <sup>2</sup>                                                       |
| Data / restraints / parameters    | 2976 / 0 / 202                                                                                    |
| Goodness-of-fit on F <sup>2</sup> | 1.027                                                                                             |
| Final R indices [I > 2σ(I)]       | R1 = 0.0370, wR2 = 0.0909                                                                         |
| R indices (all data)              | R1 = 0.0447, wR2 = 0.0970                                                                         |
| Extinction coefficient            | 0.019(2)                                                                                          |
| Largest diff. peak and hole       | 0.215 and -0.160 e.Å <sup>-3</sup>                                                                |

## 8. Characterization Data of Substrates

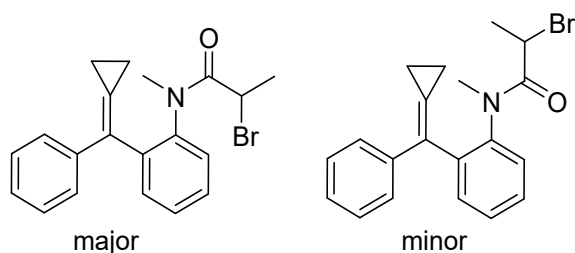

**2-bromo-N-(2-(cyclopropylidene(phenyl)methyl)phenyl)-N-4methylpropanamide (1a):** A white solid, 570 mg, 75% yield, major : minor = 6.7 : 1. M.p.: 177-178 °C. Eluent: PE/EA = 10/1. <sup>1</sup>H NMR (400 MHz, CDCl<sub>3</sub>, TMS) δ 7.49 - 7.43 (m, 4H), 7.31 - 7.27 (m, 2H), 7.23 - 7.19 (m, 3H), 4.31 (q, *J* = 7.0 Hz, 1H, *minor isomer*) & 4.05 (q, *J* = 6.7 Hz, 1H), 2.71 (s, 3H, *minor isomer*) & 2.63 (s, 3H), 1.72 (d, *J* = 7.0 Hz, 3H, *minor isomer*), 1.52 - 1.48 (m, 1H), 1.46 (d, *J* = 6.7 Hz, 3H), 1.33 - 1.24 (m, 2H), 1.13 - 1.05 (m, 1H); <sup>13</sup>C NMR (150 MHz, CDCl<sub>3</sub>, TMS) δ 170.7 & 169.2 (*minor isomer*), 141.7 (*minor isomer*) & 141.4, 141.1 (*minor isomer*), 140.7 (*minor isomer*), 140.1, 140.0, 132.3, 131.8, 129.1, 128.7, 128.6, 128.4, 128.2, 127.7, 127.6, 127.3, 127.1, 126.7, 126.6 (there are multiple peaks between 132.3 - 126.6 due to rotamers), 39.3 (*minor isomer*) & 37.5, 25.4 (*minor isomer*) & 23.1, 19.0 (*minor isomer*) & 15.3, 4.8 & 4.5 (*minor isomer*), 2.7 (*minor isomer*) & 2.0; IR(EtOH): ν 3055, 2971, 2935, 1731, 1659, 1488, 1446, 1376, 1074, 766, 753, 698 cm<sup>-1</sup>; HRMS (ESI) *m/z*: [M+Na]<sup>+</sup> Calcd. for C<sub>20</sub>H<sub>20</sub>NONaBr 392.0620; found 392.0619.

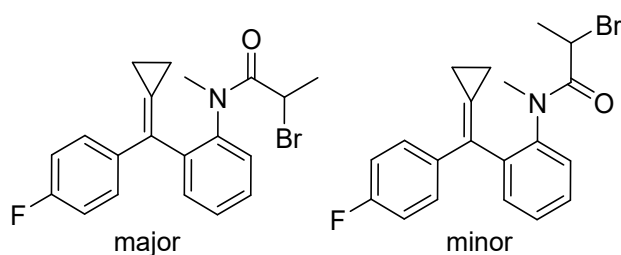

**2-bromo-N-(2-(cyclopropylidene(4-fluorophenyl)methyl)phenyl)-N-methylpropanamide (1b):** A white solid, 545 mg, 70% yield, major : minor = 5 : 1. M.p.: 147-149 °C. Eluent: PE/EA = 10/1. <sup>1</sup>H NMR (400 MHz, CDCl<sub>3</sub>, TMS) δ 7.50 - 7.40 (m, 4H), 7.20 - 7.14 (m, 2H), 6.97 (t, *J* = 8.7 Hz, 2H), 4.29 (q, *J* = 7.0 Hz, 1H, *minor isomer*) & 4.04 (q, *J* = 6.7 Hz, 1H), 2.63 (s, 3H) & 2.50 (s, 3H, *minor isomer*), 1.72 (d, *J* = 7.1 Hz, 3H, *minor isomer*) & 1.51 (d, *J*

= 6.7 Hz, 3H), 1.48 - 1.45 (m, 2H), 1.32 - 1.28 (m, 1H), 1.13 - 1.05 (m, 1H);  $^{13}\text{C}$  NMR (150 MHz,  $\text{CDCl}_3$ , TMS)  $\delta$  169.6 (*minor isomer*) & 169.2, 161.9 (d,  $J = 246.1$  Hz), 141.0, 139.6, 136.1 (d,  $J = 3.5$  Hz), 132.1, 131.6, 129.2, 128.8, 128.4, 128.2 (d,  $J = 8.3$  Hz), 127.6, 126.7, 115.3 (d,  $J = 21.3$  Hz), 115.2, 42.5 (*minor isomer*) & 39.0, 37.28 & 37.25 (*minor isomer*), 23.3 (*minor isomer*) & 20.9, 4.7 & 4.4 (*minor isomer*), 2.5 (*minor isomer*) & 2.2;  $^{19}\text{F}$  NMR (564 MHz,  $\text{CDCl}_3$ )  $\delta$  -114.6 & -115.0 (*minor isomer*); IR (acetone)  $\nu$  3039, 2966, 2919, 1654, 1593, 1506, 1484, 1446, 1379, 1221, 1155, 1094, 829, 805, 773, 749  $\text{cm}^{-1}$ ; HRMS (ESI)  $m/z$ :  $[\text{M}+\text{H}]^+$  Calcd. for  $\text{C}_{20}\text{H}_{20}\text{NOFBr}$  388.0706; found 388.0711.

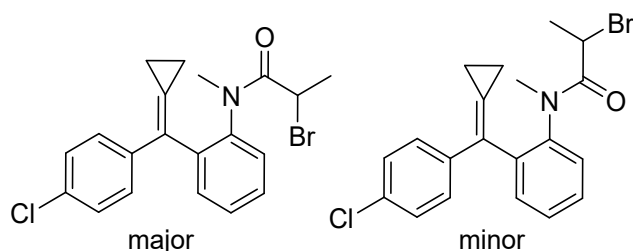

## 2-bromo-N-(2-((4-chlorophenyl)(cyclopropylidene)methyl)phenyl)-N-

**methylpropanamide (1c):** A white solid, 572 mg, 71% yield, major : minor = 3.3 : 1. M.p.: 152-154 °C. Eluent: PE/EA = 10/1.  $^1\text{H}$  NMR (400 MHz,  $\text{CDCl}_3$ , TMS)  $\delta$  7.51 - 7.45 (m, 2H), 7.45 - 7.40 (m, 2H), 7.25 - 7.19 (m, 2H), 7.14 (d,  $J = 8.6$  Hz, 2H), 4.23 (q,  $J = 6.8$  Hz, 1H, *minor isomer*) & 3.97 (q,  $J = 6.6$  Hz, 1H), 2.71 (s, 3H) & 2.55 (s, 3H, *minor isomer*), 1.57 (d,  $J = 6.9$  Hz, 3H, *minor isomer*) 1.48 (t,  $J = 7.2$  Hz, 2H), 1.34 (d,  $J = 6.6$  Hz, 3H), 1.28 (t,  $J = 6.8$  Hz, 1H), 1.17 - 1.07 (m, 1H);  $^{13}\text{C}$  NMR (100 MHz,  $\text{CDCl}_3$ , TMS)  $\delta$  169.7 (*minor isomer*) & 169.2, 141.2 (*minor isomer*) & 141.1, 139.9 (*minor isomer*) & 139.4, 139.1 (*minor isomer*) & 138.5, 133.1, 132.8, 132.1, 131.7, 129.7, 129.3, 128.8, 128.5, 128.45, 128.42, 128.3, 127.9, 127.7, 127.6, 126.9 (there are multiple peaks between 133.1 - 126.9 due to rotamers), 42.4 (*minor isomer*) & 39.0, 37.4, 23.3 (*minor isomer*) & 20.9, 4.8 & 4.5 (*minor isomer*), 2.5 (*minor isomer*) & 2.2; IR (EtOH):  $\nu$  2973, 2921, 1666, 1489, 1448, 1381, 1091, 1044, 879, 821, 757  $\text{cm}^{-1}$ ; HRMS(ESI)  $m/z$ :  $[\text{M}+\text{Na}]^+$  Calcd. for  $\text{C}_{20}\text{H}_{19}\text{NONaClBr}$  426.0230; found 426.0237.

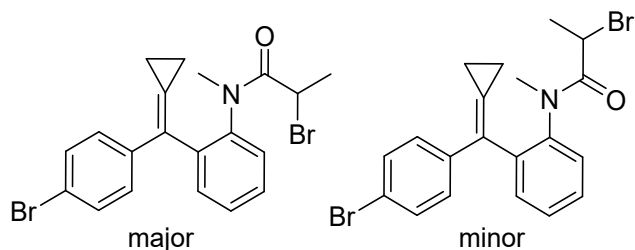

**2-bromo-N-(2-((4-bromophenyl)(cyclopropylidene)methyl)phenyl)-N-**

**methylpropanamide (1d):** A yellow solid, 645 mg, 72% yield, major : minor = 3.7 : 1. M.p.: 131-133 °C. Eluent: PE/EA = 10/1. <sup>1</sup>H NMR (400 MHz, CDCl<sub>3</sub>, TMS) δ 7.49 - 7.45 (m, 2H), 7.44 - 7.39 (m, 4H), 7.08 (d, *J* = 8.5 Hz, 2H), 4.22 (q, *J* = 6.9 Hz, 1H, *minor isomer*) & 3.97 (q, *J* = 6.6 Hz, 1H), 2.71 (s, 3H) & 2.55 (s, 3H, *minor isomer*), 1.56 (d, *J* = 6.8 Hz, 3H, *minor isomer*) 1.51 - 1.44 (m, 2H), 1.34 (d, *J* = 6.6 Hz, 3H), 1.33 - 1.27 (m, 1H), 1.16 - 1.07 (m, 1H); <sup>13</sup>C NMR (150 MHz, CDCl<sub>3</sub>, TMS) δ 169.2, 141.1, 139.3, 139.0, 131.7, 131.5, 131.4, 129.3, 128.8, 128.7, 128.5, 128.3, 127.8, 127.7, 121.2, 42.4 (*minor isomer*) & 39.0, 37.4, 20.3(*minor isomer*) & 20.9, 4.8 & 4.6 (*minor isomer*), 2.6 (*minor isomer*) & 2.2; IR (EtOH): ν 2971, 2924, 1666, 1486, 1447, 1382, 1089, 1045, 879, 771, 756 cm<sup>-1</sup>; HRMS (ESI) *m/z*: [M+Na]<sup>+</sup> Calcd. for C<sub>20</sub>H<sub>19</sub>NONaBr<sub>2</sub> 469.9725; found 469.9714.

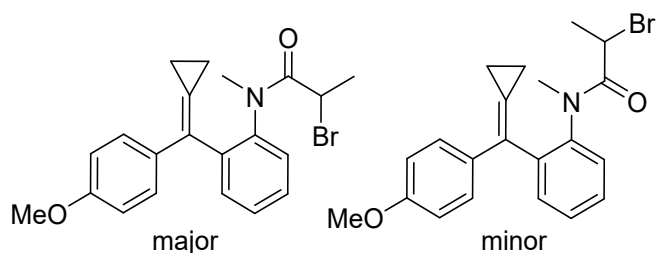

**2-bromo-N-(2-(cyclopropylidene(4-methoxyphenyl)methyl)phenyl)-N-**

**methylpropanamide (1e):** A yellow solid, 640 mg, 80% yield, major : minor = 5 : 1. M.p.: 133-135 °C. Eluent: PE/EA = 10/1. <sup>1</sup>H NMR (400 MHz, CDCl<sub>3</sub>, TMS) δ 7.47 - 7.39 (m, 4H), 7.15 (d, *J* = 8.8 Hz, 2H), 6.83 - 6.77 (m, 2H), 4.25 (q, *J* = 6.9 Hz, 1H, *minor isomer*) & 4.00 (q, *J* = 6.6 Hz, 1H), 3.79 (s, 3H, *minor isomer*) & 3.78 (s, 3H), 2.73 (s, 3H) & 2.55 (s, 3H, *minor isomer*), 1.57 (d, *J* = 6.9 Hz, 3H, *minor isomer*), 1.46 (t, *J* = 8.4 Hz, 2H), 1.32 (d, *J* = 6.6 Hz, 3H), 1.28 - 1.20 (m, 1H), 1.12 - 1.04 (m, 1H); <sup>13</sup>C NMR (100 MHz, CDCl<sub>3</sub>, TMS) δ 169.6 (*minor isomer*) & 169.2, 158.8 & 158.7 (*minor isomer*), 141.3 (*minor isomer*) & 141.1,

140.6 (*minor isomer*) & 140.1, 133.2 (*minor isomer*) & 132.6, 132.1 (*minor isomer*) & 131.7, 128.9, 128.6, 128.4, 128.2, 128.0, 127.8, 127.6, 124.8, 113.7, 55.2, 42.6 (*minor isomer*) & 39.3, 37.4, 23.3 (*minor isomer*) & 21.0, 4.6 & 4.4 (*minor isomer*), 2.3 (*minor isomer*) & 2.0; IR (EtOH):  $\nu$  2971, 2927, 1654, 1509, 1446, 1385, 1300, 1245, 1167, 1029, 825, 790, 777  $\text{cm}^{-1}$ ; HRMS (ESI)  $m/z$ :  $[M+Na]^+$  Calcd. for  $\text{C}_{21}\text{H}_{22}\text{NO}_2\text{NaBr}$  422.0726; found 422.0719.

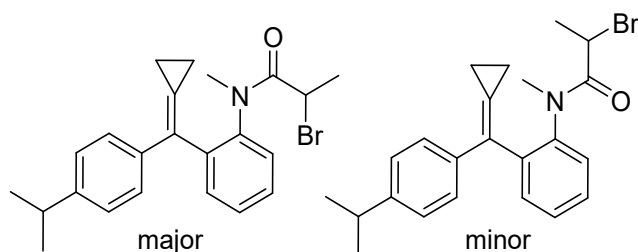

**2-bromo-*N*-(2-(cyclopropylidene(4-isopropylphenyl)methyl)phenyl)-*N*-**

**methylpropanamide (1f):** A yellow oil, 580 mg, 70% yield, major : minor = 8.3 : 1. Eluent: PE/EA = 10/1.  $^1\text{H}$  NMR (400 MHz,  $\text{CDCl}_3$ , TMS)  $\delta$  7.47 - 7.44 (m, 3H), 7.43 - 7.39 (m, 1H), 7.13 (s, 4H), 4.31 (q,  $J = 7.0$  Hz, 1H, *minor isomer*) & 4.02 (q,  $J = 6.7$  Hz, 1H), 2.90 - 2.81 (m, 1H), 2.67 (s, 3H) & 2.47 (s, 3H, *minor isomer*), 1.48 (t,  $J = 7.2$  Hz, 2H), 1.40 (d,  $J = 6.7$  Hz, 3H), 1.24 - 1.22 (m, 1H), 1.20 (d,  $J = 6.9$  Hz, 6H), 1.11 - 1.03 (m, 1H);  $^{13}\text{C}$  NMR (150 MHz,  $\text{CDCl}_3$ , TMS,)  $\delta$  170.7, 148.1, 141.4, 140.3, 137.4, 131.8, 129.0, 128.6, 128.5, 127.8, 126.7, 126.4, 125.6, 37.6, 33.8, 24.0, 23.9, 23.2, 15.6, 4.8, 2.0; IR (acetone):  $\nu$  2959, 2919, 2861, 1659, 1589, 1485, 1446, 1372, 1099, 1060, 843, 826, 762  $\text{cm}^{-1}$ ; HRMS (ESI)  $m/z$ :  $[M+H]^+$  Calcd. for  $\text{C}_{23}\text{H}_{27}\text{NOBr}$  412.1270; found 412.1279.

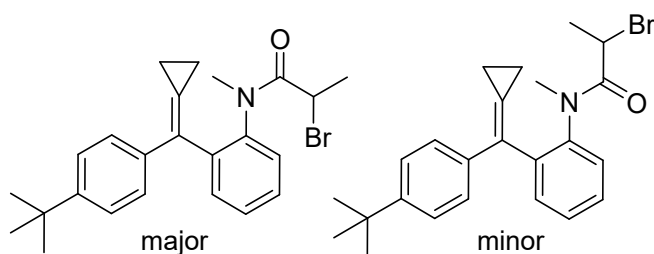

**2-bromo-*N*-(2-((4-(tert-butyl)phenyl)(cyclopropylidene)methyl)phenyl)-*N*-**

**methylpropanamide (1g):** A white solid, 632 mg, 74% yield, major : minor = 5 : 1. M.p.: 97-99  $^{\circ}\text{C}$ . Eluent: PE/EA = 10/1.  $^1\text{H}$  NMR (400 MHz,  $\text{CDCl}_3$ , TMS)  $\delta$  7.46 (d,  $J = 2.7$  Hz, 3H),



7.43 - 7.40 (m, 1H), 7.29 (d,  $J = 8.4$  Hz, 2H), 7.15 (d,  $J = 8.5$  Hz, 2H), 4.01 (q,  $J = 6.7$  Hz, 1H) & 3.95 (q,  $J = 6.5$  Hz, 1H, *minor isomer*), 2.76 (s, 3H, *minor isomer*) & 2.68 (s, 3H), 1.72 (d,  $J = 7.0$  Hz, 3H, *minor isomer*), 1.48 (t,  $J = 7.5$  Hz, 2H), 1.37 (d,  $J = 6.7$  Hz, 3H), 1.27 (s, 9H), 1.23 - 1.15 (m, 1H), 1.13 - 1.03 (m, 1H);  $^{13}\text{C}$  NMR (100 MHz,  $\text{CDCl}_3$ , TMS, *major isomer*)  $\delta$  170.6, 150.3, 141.3, 140.2, 136.9, 131.8, 128.9, 128.6, 128.2, 127.7, 126.3, 125.6, 125.2, 37.5, 34.4, 31.2, 23.1, 15.5, 4.7, 1.9; IR (EtOH):  $\nu$  2963, 2866, 1640, 1486, 1447, 1384, 1267, 1088, 1045, 837, 758  $\text{cm}^{-1}$ ; HRMS (ESI)  $m/z$ :  $[\text{M}+\text{H}]^+$  Calcd. for  $\text{C}_{24}\text{H}_{29}\text{NOBr}$  426.1427; found 426.1421.

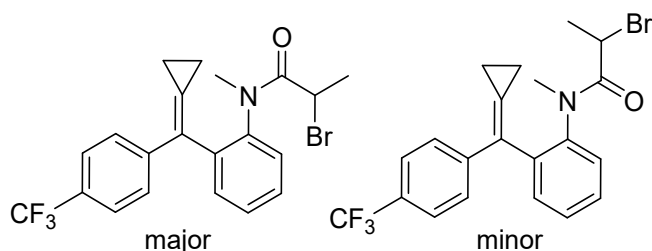

**2-bromo-N-(2-(cyclopropylidene(4-(trifluoromethyl)phenyl)methyl)phenyl)-N-**

**methylpropanamide (1h):** A white solid, 530 mg, 61% yield, major : minor = 3.4 : 1. M.p.: 101-103 °C. Eluent: PE/EA = 10/1.  $^1\text{H}$  NMR (400 MHz,  $\text{CDCl}_3$ , TMS, *major isomer*)  $\delta$  7.54 (d,  $J = 7.9$  Hz, 2H), 7.53 - 7.47 (m, 2H), 7.49 - 7.41 (m, 2H), 7.32 (d,  $J = 8.1$  Hz, 2H), 4.23 (q,  $J = 6.9$  Hz, 1H, *minor isomer*) & 3.96 (q,  $J = 6.6$  Hz, 1H), 2.69 (s, 3H) & 2.51 (s, 3H, *minor isomer*), 1.57 (d,  $J = 6.9$  Hz, 3H, *minor isomer*), 1.53 (td,  $J = 7.0, 3.7$  Hz, 2H), 1.39 - 1.34 (m, 1H), 1.31 (d,  $J = 6.6$  Hz, 3H), 1.22 - 1.11 (m, 1H);  $^{13}\text{C}$  NMR (150 MHz,  $\text{CDCl}_3$ , TMS)  $\delta$  169.3, 143.6, 141.1, 139.1, 131.8, 129.54, 129.50, 129.3 (q,  $J = 33.2$  Hz), 128.9, 128.6, 127.3, 126.9, 125.4 (q,  $J = 4.0$  Hz), 124.0 (q,  $J = 271.3$  Hz), 42.3 (*minor isomer*) & 38.9, 37.4, 23.3 (*minor isomer*) & 20.9, 4.9 & 4.7 (*minor isomer*), 2.7 (*minor isomer*) & 2.3;  $^{19}\text{F}$  NMR (564 MHz,  $\text{CDCl}_3$ )  $\delta$  -62.4 (*minor isomer*) & -62.5; IR (acetone):  $\nu$  3060, 2976, 2919, 1666, 1615, 1487, 1445, 1373, 1311, 1217, 1163, 1119, 1068, 1015, 848, 770, 753  $\text{cm}^{-1}$ ; HRMS (ESI)  $m/z$ :  $[\text{M}+\text{H}]^+$  Calcd. for  $\text{C}_{21}\text{H}_{20}\text{NOF}_3\text{Br}$  438.0674; found 438.0679.

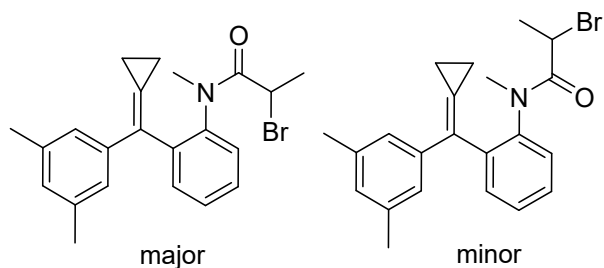

**2-bromo-N-(2-(cyclopropylidene(3,5-dimethylphenyl)methyl)phenyl)-N-**

**methylpropanamide (1i):** A white solid, 625 mg, 75% yield, major : minor = 5 : 1. M.p.: 112-114 °C. Eluent: PE/EA = 10/1. <sup>1</sup>H NMR (600 MHz, CDCl<sub>3</sub>, TMS) δ 7.52- 7.38 (m, 4H), 6.89- 6.83 (m, 1H), 6.82 - 6.79 (m, 2H), 4.23 (q, *J* = 6.9 Hz, 1H, *minor isomer*) & 3.96 (q, *J* = 6.5 Hz, 1H), 2.76 (s, 3H) & 2.54 (s, 1H, *minor isomer*), 2.26 (s, 6H, *minor isomer*) & 2.24 (s, 6H), 1.57 (d, *J* = 6.8 Hz, 3H, *minor isomer*), 1.51 - 1.46 (m, 2H), 1.26 (d, *J* = 6.6 Hz, 3H), 1.21 (td, *J* = 9.2, 6.0 Hz, 1H), 1.09 (td, *J* = 9.2, 6.2 Hz, 1H); <sup>13</sup>C NMR (150 MHz, CDCl<sub>3</sub>, TMS) δ 169.2, 141.1, 140.1, 139.7, 137.8, 131.8, 129.0, 128.9, 128.6, 128.3, 126.1, 124.4, 39.4, 37.3, 21.3, 20.8, 4.9, 2.0; IR (EtOH) ν 2971, 2911, 1667, 1598, 1485, 1447, 1373, 1270, 1044, 769, 701, 655 cm<sup>-1</sup>; HRMS (ESI) *m/z*: [M+Na]<sup>+</sup> Calcd. for C<sub>22</sub>H<sub>24</sub>NONaBr 420.0933; found 420.0925.

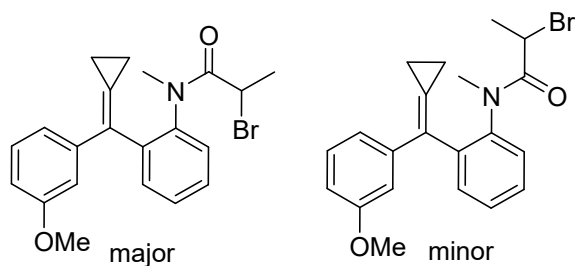

**2-bromo-N-(2-(cyclopropylidene(3-methoxyphenyl)methyl)phenyl)-N-**

**methylpropanamide (1j):** A yellow oil, 620 mg, 77% yield, major : minor = 7 : 1. Eluent: PE/EA = 10/1. <sup>1</sup>H NMR (400 MHz, CDCl<sub>3</sub>, TMS) δ 7.48 - 7.39 (m, 4H), 7.23 - 7.16 (m, 1H), 6.83 - 6.73 (m, 3H), 4.25 (q, *J* = 6.9 Hz, 1H, *minor isomer*) & 4.00 (q, *J* = 6.6 Hz, 1H), 3.77 (s, 3H, *minor isomer*) & 3.75 (s, 3H), 2.76 (s, 3H) & 2.55 (s, 3H, *minor isomer*), 1.57 (d, *J* = 6.9 Hz, 3H, *minor isomer*), 1.54 - 1.47 (m, 2H), 1.30 (d, *J* = 6.6 Hz, 3H), 1.27 - 1.20 (m, 1H), 1.15 - 1.07 (m, 1H); <sup>13</sup>C NMR (100 MHz, CDCl<sub>3</sub>, TMS, *major isomer*) δ 169.6 (*minor isomer*)

& 169.2, 159.44 & 159.37 (*minor isomer*), 141.9 (*minor isomer*) & 141.3, 141.0, 140.3 (*minor isomer*) & 139.7, 132.0 (*minor isomer*) & 131.7, 129.3, 129.0, 128.6, 128.33, 128.30, 126.8, 126.2, 119.7 (*minor isomer*) & 119.3, 112.9 (*minor isomer*) & 112.8, 112.5 (*minor isomer*) & 112.1, 55.1, 42.5 (*minor isomer*) & 39.3, 37.3 & 37.2 (*minor isomer*), 23.2 (*minor isomer*) & 20.9, 4.8 & 4.5 (*minor isomer*), 2.4 (*minor isomer*) & 2.0; IR (acetone)  $\nu$  2974, 2924, 2832, 1665, 1596, 1577, 1486, 1447, 1425, 1361, 1259, 1221, 1164, 1045, 977, 773, 746, 689  $\text{cm}^{-1}$ ; HRMS (ESI)  $m/z$ :  $[M+H]^+$  Calcd. for  $\text{C}_{21}\text{H}_{23}\text{NO}_2\text{Br}$  400.0906; found 400.0912.

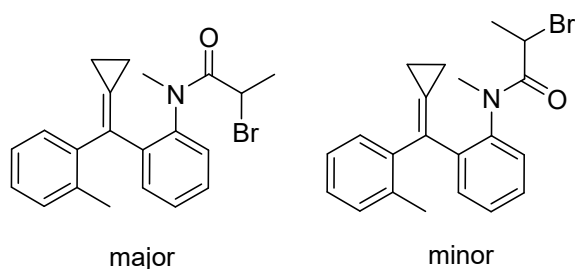

**2-bromo-N-(2-(cyclopropylidene(o-tolyl)methyl)phenyl)-N-methylpropanamide (1k):** A brown oil, 546 mg, 71% yield, major : minor = 3 : 1. Eluent: PE/EA = 10/1.  $^1\text{H}$  NMR (400 MHz,  $\text{CDCl}_3$ , TMS)  $\delta$  7.55 (d,  $J = 7.6$  Hz, 1H), 7.50 - 7.36 (m, 2H), 7.31 (dt,  $J = 7.7, 2.8$  Hz, 1H), 7.17 - 7.09 (m, 3H), 7.00 (dd,  $J = 5.6, 3.5$  Hz, 1H), 4.20 (q,  $J = 6.9$  Hz, 1H, *minor isomer*) & 3.88 (q,  $J = 6.6$  Hz, 1H), 2.52 (s, 3H) & 2.25 (s, 1H, *minor isomer*), 2.06 (s, 3H) & 2.03 (s, 3H, *minor isomer*), 1.26 - 1.17 (m, 1H), 1.55 (d,  $J = 6.9$  Hz, 3H, *minor isomer*) 1.45 - 1.33 (m, 5H), 1.32 (d,  $J = 6.5$  Hz, 1H);  $^{13}\text{C}$  NMR (100 MHz,  $\text{CDCl}_3$ , TMS)  $\delta$  169.4 (*minor isomer*) & 168.9, 141.6 (*minor isomer*) & 141.2, 140.7 (*minor isomer*) & 140.6, 139.9 (*minor isomer*) & 139.5, 135.8 (*minor isomer*) & 135.7, 132.3 (*minor isomer*) & 132.0, 130.7, 130.2, 129.9, 129.3, 129.1, 128.74, 128.68, 127.4, 126.1 (*minor isomer*) & 125.5, 41.7 (*minor isomer*) & 39.3, 36.4 & 36.1 (*minor isomer*), 23.1 (*minor isomer*), 21.1, 20.8, 4.9 & 4.3 (*minor isomer*), 3.5 (*minor isomer*) & 3.3; IR (neat)  $\nu$  2974, 2923, 1669, 1483, 1444, 1414, 1372, 1108, 1064, 762, 737, 724  $\text{cm}^{-1}$ ; HRMS (ESI)  $m/z$ :  $[M+\text{Na}]^+$  Calcd. for  $\text{C}_{21}\text{H}_{22}\text{NONaBr}$  406.0777; found 406.0781.

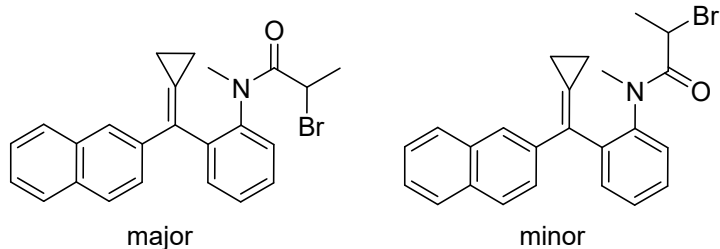

**2-bromo-N-(2-(cyclopropylidene(naphthalen-2-yl)methyl)phenyl)-N-**

**methylpropanamide (1l):** A white solid, 630 mg, 75% yield, major : minor = 4 : 1. M.p.: 195-197 °C. Eluent: PE/EA = 10/1. <sup>1</sup>H NMR (400 MHz, CDCl<sub>3</sub>, TMS) δ 7.77 (d, *J* = 8.6 Hz, 2H), 7.70 - 7.66 (m, 1H), 7.56 - 7.48 (m, 4H), 7.45 (d, *J* = 10.2 Hz, 2H), 7.41 (dd, *J* = 6.3, 3.3 Hz, 2H), 4.29 (q, *J* = 6.8 Hz, 1H, *minor isomer*) & 4.02 (q, *J* = 6.5 Hz, 1H), 2.67 (s, 3H) & 2.41 (s, 3H, *minor isomer*), 1.60 - 1.54 (m, 2H), 1.46 - 1.25 (m, 2H), 1.16 (d, *J* = 6.6 Hz, 3H); <sup>13</sup>C NMR (150 MHz, CDCl<sub>3</sub>, TMS) δ 169.8 (*minor isomer*) & 169.3, 141.3, 140.0, 137.5, 133.2, 132.6, 131.9, 129.2, 128.8, 128.7, 128.6, 128.3, 128.0, 127.7, 127.4, 126.3, 126.0, 125.4, 124.9, 42.6 (*minor isomer*) & 39.3, 37.5, 23.3 (*minor isomer*) & 21.0, 5.1, 2.2; IR (neat) ν 3055, 2971, 2914, 1666, 1596, 1487, 1447, 1422, 1383, 1269 1062, 817, 774, 749 cm<sup>-1</sup>; HRMS (ESI) *m/z*: [M+H]<sup>+</sup> Calcd. for C<sub>24</sub>H<sub>22</sub>NONaBr 442.0777; found 442.0781.

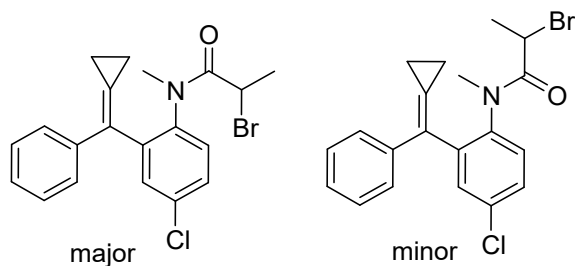

**2-bromo-N-(4-chloro-2-(cyclopropylidene(phenyl)methyl)phenyl)-N-**

**methylpropanamide (1m):** A pale yellow oil, 612 mg, 76% yield, major : minor = 5 : 1. Eluent: PE/EA = 10/1. <sup>1</sup>H NMR (400 MHz, CDCl<sub>3</sub>, TMS) δ 7.44 (dq, *J* = 5.5, 2.5 Hz, 2H), 7.37 (d, *J* = 9.1 Hz, 1H), 7.32 - 7.27 (m, 2H), 7.26 - 7.18 (m, 3H), 4.22 (q, *J* = 6.9 Hz, 1H, *minor isomer*) & 3.93 (q, *J* = 6.6 Hz, 1H), 2.67 (s, 3H) & 2.44 (s, 3H, *minor isomer*), 1.56 (d, *J* = 6.9 Hz, 3H, *minor isomer*), 1.50 (t, *J* = 7.9 Hz, 2H), 1.38 - 1.31 (m, 1H), 1.28 (d, *J* = 6.7 Hz, 3H), 1.21 - 1.10 (m, 1H); <sup>13</sup>C NMR (150 MHz, CDCl<sub>3</sub>, TMS) δ 169.1, 141.8, 139.7, 139.4, 134.4, 131.6, 129.9, 129.2, 128.6, 127.6, 126.7, 39.0, 37.2, 20.9, 4.8, 2.3; IR (EtOH) ν 2972,

2918, 2867, 1655, 1483, 1445, 1400, 1375, 1274, 1090, 1047, 880, 775, 748, 696  $\text{cm}^{-1}$ ;  
HRMS (ESI)  $m/z$ :  $[M+Na]^+$  Calcd. for  $\text{C}_{20}\text{H}_{19}\text{NONaClBr}$  426.0230; found 426.0232.

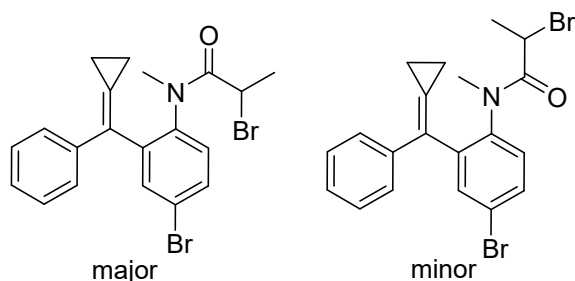

**2-bromo-N-(4-bromo-2-(cyclopropylidene(phenyl)methyl)phenyl)-N-**

**methylpropanamide (1n):** A light yellow solid, 580 mg, 64% yield, major : minor = 5 : 1. M.p.: 141-143 °C. Eluent: PE/EA = 10/1.  $^1\text{H}$  NMR (400 MHz,  $\text{CDCl}_3$ , TMS)  $\delta$  7.61 - 7.56 (m, 2H), 7.34 - 7.27 (m, 3H), 7.25 - 7.17 (m, 3H), 4.21 (q,  $J = 6.8$  Hz, 1H, *minor isomer*) & 3.93 (q,  $J = 6.5$  Hz, 1H), 2.67 (s, 3H) & 2.44 (s, 3H, *minor isomer*), 1.57 (d,  $J = 6.9$  Hz, 1H, *minor isomer*), 1.50 (t,  $J = 7.9$  Hz, 2H), 1.39 - 1.31 (m, 1H), 1.28 (d,  $J = 6.6$  Hz, 3H), 1.21 - 1.10 (m, 1H);  $^{13}\text{C}$  NMR (150 MHz,  $\text{CDCl}_3$ , TMS)  $\delta$  169.2, 142.0, 140.2, 139.4, 134.5, 132.2, 130.1, 128.6, 127.9, 127.6, 126.7, 122.5, 39.0, 37.3, 20.9, 4.8, 2.3; IR (neat)  $\nu$  3057, 2968, 1666, 1480, 1424, 1397, 1373, 1277, 1114, 1079, 908, 825, 769, 728, 697  $\text{cm}^{-1}$ ; HRMS (ESI)  $m/z$ :  $[M+H]^+$  Calcd. for  $\text{C}_{20}\text{H}_{20}\text{NOBr}_2$  447.9906; found 447.9915.

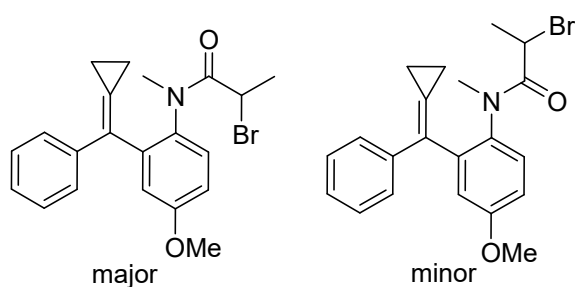

**2-bromo-N-(2-(cyclopropylidene(phenyl)methyl)-4-methoxyphenyl)-N-**

**methylpropanamide (1o):** A light yellow solid, 542 mg, 67% yield, major : minor = 4 : 1. M.p.: 134-135 °C. Eluent: PE/EA = 10/1.  $^1\text{H}$  NMR (400 MHz,  $\text{CDCl}_3$ , TMS)  $\delta$  7.35 - 7.32 (m, 1H), 7.31 - 7.27 (m, 2H), 7.25 - 7.20 (m, 3H), 7.00 - 6.94 (m, 2H), 4.28 (q,  $J = 6.9$  Hz, 1H, *minor isomer*) & 4.00 (q,  $J = 6.6$  Hz, 1H), 3.89 (s, 3H), 2.67 (s, 3H) & 2.44 (s, 3H, *minor isomer*), 1.57 (d,  $J = 6.9$  Hz, 3H, *minor isomer*), 1.49 (t,  $J = 7.6$  Hz, 2H), 1.30 - 1.27 (m, 1H),

1.26 (d,  $J = 6.5$  Hz, 3H), 1.13 (dt,  $J = 9.0, 7.5$  Hz, 1H)  $^{13}\text{C}$  NMR (150 MHz,  $\text{CDCl}_3$ , TMS)  $\delta$  169.7, 159.3, 141.2, 139.8, 133.9, 129.4, 128.6, 128.4, 128.3, 127.4, 127.2, 126.7, 126.6, 117.2, 113.6, 55.6, 42.4, 39.3, 37.5, 21.0, 4.8, 2.2; IR (neat)  $\nu$  2959, 2909, 1664, 1597, 1493, 1462, 1445, 1370, 1297, 1236, 1173, 1034, 822, 803, 766, 700  $\text{cm}^{-1}$ ; HRMS (ESI)  $m/z$ :  $[\text{M}+\text{H}]^+$  Calcd. for  $\text{C}_{21}\text{H}_{23}\text{NOBr}$  400.0912; found 400.0913.

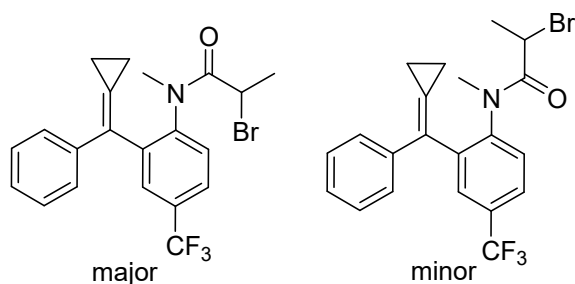

**2-bromo-N-(2-(cyclopropylidene(phenyl)methyl)-4-(trifluoromethyl)phenyl)-N-**

**methylpropanamide (1p):** A light green solid, 320 mg, 37% yield, major : minor = 5 : 1. M.p.: 107-109 °C. Eluent: PE/EA = 10/1.  $^1\text{H}$  NMR (400 MHz,  $\text{CDCl}_3$ , TMS)  $\delta$  7.73 (d,  $J = 7.8$  Hz, 2H), 7.57 (d,  $J = 8.0$  Hz, 1H), 7.33 - 7.23 (m, 3H), 7.18 (d,  $J = 6.9$  Hz, 2H), 4.17 (q,  $J = 6.9$  Hz, 1H, *minor isomer*) & 3.90 (q,  $J = 6.5$  Hz, 1H), 2.71 (s, 3H) & 2.49 (s, 3H, *minor isomer*), 1.57 (d,  $J = 6.9$  Hz, 3H, *minor isomer*), 1.53 (t,  $J = 8.0$  Hz, 2H), 1.40 - 1.32 (m, 1H), 1.30 (d,  $J = 6.6$  Hz, 3H), 1.22 - 1.11 (m, 1H);  $^{13}\text{C}$  NMR (150 MHz,  $\text{CDCl}_3$ , TMS)  $\delta$  168.8, 144.2, 140.9, 139.2, 130.8 (q,  $J = 32.4$  Hz), 129.1, 128.6 (q,  $J = 4.1$  Hz), 128.5, 128.3, 127.6, 127.0, 126.6, 126.0 (q,  $J = 4.1$  Hz), 123.6 (q,  $J = 270.9$  Hz), 38.9, 37.1, 20.8, 4.8, 2.2;  $^{19}\text{F}$  NMR (564 MHz,  $\text{CDCl}_3$ )  $\delta$  -62.37 & -62.43 (*minor isomer*); IR(neat): 2978, 1667, 1612, 1496, 1426, 1376, 1206, 1123, 1080, 975, 793, 762, 670; HRMS (ESI)  $m/z$ :  $[\text{M}+\text{Na}]^+$  Calcd. for  $\text{C}_{21}\text{H}_{19}\text{NOF}_3\text{NaBr}$  460.0494; found 460.0493.

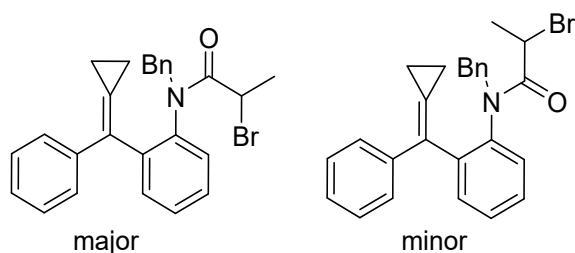

**N-benzyl-2-bromo-N-(2-(cyclopropylidene(phenyl)methyl)phenyl)propanamide(1q):** A

light green solid, 680 mg, 75% yield, major : minor = 6.7 : 1. M.p.: 191-193 °C. Eluent: PE/EA = 10/1. <sup>1</sup>H NMR (400 MHz, CDCl<sub>3</sub>, TMS) δ 7.46 - 7.41 (m, 2H), 7.37 - 7.28 (m, 4H), 7.26 - 7.21 (m, 5H), 7.13 (dd, *J* = 7.5, 2.0 Hz, 2H), 6.98 (d, *J* = 7.5 Hz, 1H), 5.10 (d, *J* = 14.6 Hz, 1H) & 4.80 (d, *J* = 14.6 Hz, 1H, *minor isomer*), 4.25 (q, *J* = 6.9 Hz, 1H, *minor isomer*) & 3.94 (q, *J* = 6.6 Hz, 1H), 3.34 (d, *J* = 14.7 Hz, 1H) & 2.98 (d, *J* = 14.7 Hz, 1H, *minor isomer*), 1.59 (d, *J* = 6.9 Hz, 3H, *minor isomer*), 1.56 - 1.46 (m, 2H), 1.33 - 1.27 (m, 1H), 1.26 (d, *J* = 6.6 Hz, 3H), 1.17 (td, *J* = 9.2, 6.3 Hz, 1H); <sup>13</sup>C NMR (100 MHz, CDCl<sub>3</sub>, TMS) δ 169.4 (*minor isomer*) & 169.0, 140.3 (*minor isomer*), 140.1 (*minor isomer*), 139.8, 139.6, 139.3 (*minor isomer*) & 138.9, 136.9, 132.0 (*minor isomer*) & 131.5, 129.4, 128.5, 128.21, 128.17, 128.0, 127.1, 126.9, 126.6, 126.5, 51.3, 42.9 (*minor isomer*) & 39.1, 23.1 (*minor isomer*) & 20.6, 4.4 & 4.2 (*minor isomer*), 2.2 (*minor isomer*) & 2.0; IR(EtOH): ν 3057, 3026, 2974, 2929, 1664, 1485, 1447, 1397, 1174, 1042, 765, 749, 697 cm<sup>-1</sup>; HRMS (ESI) *m/z*: [M+Na]<sup>+</sup> Calcd. for C<sub>26</sub>H<sub>24</sub>NONaBr 468.0933; found 468.0939.

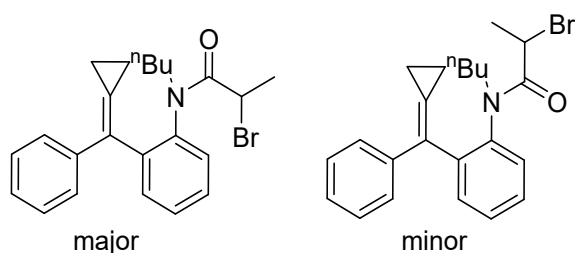

**2-bromo-N-butyl-N-(2-(cyclopropylidene(phenyl)methyl)phenyl)propenamide (1r):** A pale yellow oil, 672 mg, 83% yield, major : minor = 8 : 1. Eluent: PE/EA = 10/1. <sup>1</sup>H NMR (400 MHz, CDCl<sub>3</sub>, TMS) δ 7.53 - 7.39 (m, 4H), 7.30 - 7.26 (m, 2H), 7.21 (d, *J* = 7.2 Hz, 3H), 4.21 (q, *J* = 6.9 Hz, 1H, *minor isomer*) & 3.85 (q, *J* = 6.5 Hz, 1H), 3.66 - 3.63 (m, 1H) & 3.27 - 3.12 (m, 1H, *minor isomer*), 2.48 - 2.45 (m, 1H) & 2.24 - 2.17 (m, 1H, *minor isomer*), 1.61 (d, *J* = 6.9 Hz, 3H, *minor isomer*) 1.59 - 1.50 (m, 2H), 1.49 - 1.43 (m, 1H), 1.43 - 1.31 (m, 2H), 1.27 - 1.17 (m, 2H), 1.15 (d, *J* = 6.5 Hz, 3H), 1.14 - 1.09 (m, 1H), 0.82 (t, *J* = 7.3 Hz, 3H); <sup>13</sup>C NMR (150 MHz, CDCl<sub>3</sub>, TMS) δ 168.9, 140.1, 140.0, 139.9, 132.1, 129.5, 128.7, 128.52, 128.46, 127.3, 126.7, 48.9, 40.3, 29.1, 21.0, 20.1, 13.8, 4.8, 2.3; IR (EtOH): ν 2974, 2929, 2866, 1663, 1486, 1446, 1403, 1372, 1267, 1078, 1046, 880, 765, 753 cm<sup>-1</sup>; HRMS

(ESI)  $m/z$ :  $[M+Na]^+$  Calcd. for  $C_{23}H_{26}NONaBr$  434.1090; found 434.1085.

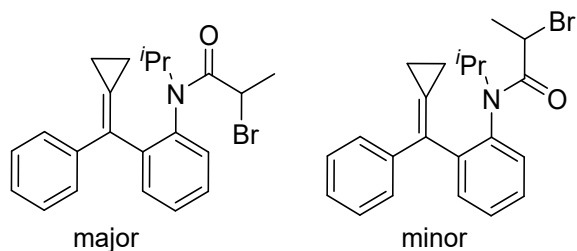

**2-bromo-N-(2-(cyclopropylidene(phenyl)methyl)phenyl)-N-isopropylpropanamide (1s):**

A yellow oil, 580mg, 73% yield, major : minor = 10 : 1. Eluent: PE/EA = 10/1.  $^1H$  NMR (400 MHz,  $CDCl_3$ , TMS)  $\delta$  7.50 - 7.38 (m, 4H), 7.31 - 7.27 (m, 1H), 7.26 - 7.18 (m, 4H), 4.15 (q,  $J$  = 6.8 Hz, 1H, *minor isomer*) & 3.74 (q,  $J$  = 6.5 Hz, 1H), 3.70 - 3.60 (m, 1H) & 3.37 (m, 1H, *minor isomer*), 1.58 (d,  $J$  = 6.6 Hz, 3H, *minor isomer*), 1.56 - 1.38 (m, 2H), 1.17 (dd,  $J$  = 8.9, 6.4 Hz, 2H), 1.11 (t,  $J$  = 6.7 Hz, 6H), 1.01 (d,  $J$  = 6.4 Hz, 3H);  $^{13}C$  NMR (150 MHz,  $CDCl_3$ , TMS)  $\delta$  168.9, 140.22, 140.19, 140.1, 132.3, 129.7, 128.6, 128.5, 128.4, 127.2, 126.9, 54.4, 42.1, 21.1, 20.4, 18.8, 4.8, 2.4; IR (EtOH)  $\nu$  3052, 3974, 2922, 1658, 1594, 1485, 1445, 1424, 1373, 1349, 1281, 1059, 981, 907, 764, 727, 696, 679  $cm^{-1}$ ; HRMS (ESI)  $m/z$ :  $[M+Na]^+$  Calcd. for  $C_{22}H_{24}NONaBr$  420.0933; found 420.0936.

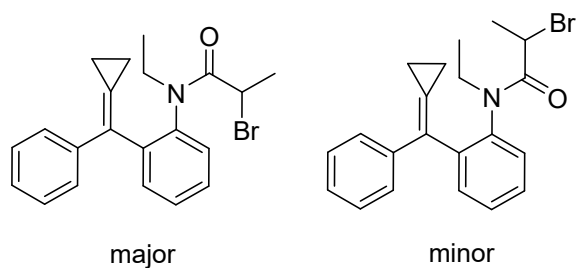

**2-bromo-N-(2-(cyclopropylidene(phenyl)methyl)phenyl)-N-ethylpropanamide (1t):**

A yellow oil, 465 mg, 55% yield, major : minor = 5 : 1. Eluent: PE/EA = 10/1.  $^1H$  NMR (400 MHz,  $CDCl_3$ , TMS)  $\delta$  7.51 - 7.41 (m, 4H), 7.26 (t,  $J$  = 3.5 Hz, 2H), 7.21 (d,  $J$  = 7.5 Hz, 3H), 4.20 (q,  $J$  = 6.9 Hz, 1H, *minor isomer*) & 3.85 (q,  $J$  = 6.5 Hz, 1H), 3.65 (dq,  $J$  = 14.2, 7.1 Hz, 1H) & 3.26 (dq,  $J$  = 14.2, 7.1 Hz, 1H, *minor isomer*), 2.52 (dq,  $J$  = 14.1, 7.1 Hz, 1H) & 2.34 - 2.24 (m, 1H, *minor isomer*), 1.55 - 1.40 (m, 2H), 1.21 (dd,  $J$  = 9.2, 5.8 Hz, 1H), 1.18 (d,  $J$  = 6.5 Hz, 3H), 1.15 - 1.09 (m, 1H), 1.04 (t,  $J$  = 7.1 Hz, 3H);  $^{13}C$  NMR (150 MHz,  $CDCl_3$ , TMS,)



$\delta$  168.7, 140.1, 140.0, 139.9, 132.0, 129.4, 128.7, 128.6, 128.5, 127.3, 126.7, 44.2, 40.2, 21.0, 12.2, 4.7, 2.2; IR (neat)  $\nu$  3060, 2968, 2931, 1662, 1486, 1446, 1401, 1372, 1260, 764, 733, 696  $\text{cm}^{-1}$ ; HRMS (ESI)  $m/z$ :  $[M+H]^+$  Calcd. for  $\text{C}_{21}\text{H}_{23}\text{NOBr}$  384.0957; found 384.0959.

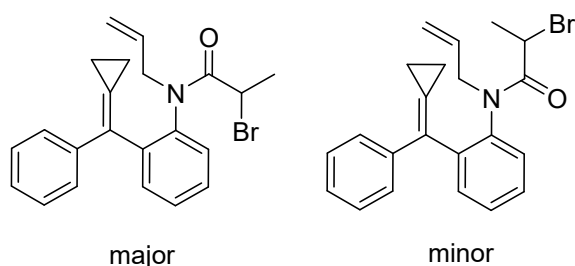

***N*-allyl-2-bromo-*N*-(2-(cyclopropylidene(phenyl)methyl)phenyl)propenamide (1u):** A yellow oil, 380 mg, 48% yield, major : minor = 6 : 1. Eluent: PE/EA = 10/1.  $^1\text{H}$  NMR (400 MHz,  $\text{CDCl}_3$ , TMS, *major isomer*)  $\delta$  7.50 - 7.41 (m, 4H), 7.29 (d,  $J = 7.7$  Hz, 2H), 7.22 (t,  $J = 7.8$  Hz, 3H), 5.85 - 5.73 (m, 1H), 5.13 - 5.02 (m, 2H) & 4.98 - 4.90 (m, 2H, *minor isomer*), 4.24 (q,  $J = 6.9$  Hz, 1H, *minor isomer*), 4.20 - 4.10 (m, 1H), 3.94 (q,  $J = 6.5$  Hz, 1H), 3.88 - 3.81 (m, 1H, *minor isomer*), 2.95 (dd,  $J = 15.1, 7.3$  Hz, 1H) & 2.67 (dd,  $J = 15.0, 8.0$  Hz, 1H, *minor isomer*), 1.58 (d,  $J = 6.9$  Hz, 3H, *minor isomer*), 1.51-1.47 (m, 2H), 1.32 - 1.20 (m, 4H), 1.18 - 1.07 (m, 1H);  $^{13}\text{C}$  NMR (150 MHz,  $\text{CDCl}_3$ , TMS, *major isomer*)  $\delta$  168.9, 140.1, 140.0, 139.9, 132.5, 131.8, 129.4, 128.8, 128.6, 128.5, 127.4, 126.9, 126.8, 117.5, 51.9, 39.8, 20.8, 4.8, 2.2; IR (neat)  $\nu$  3066, 2973, 2917, 1661, 1486, 1447, 1396, 907, 755, 727, 697  $\text{cm}^{-1}$ ; HRMS (ESI)  $m/z$ :  $[M+\text{Na}]^+$  Calcd. for  $\text{C}_{22}\text{H}_{22}\text{NONaBr}$  418.0777; found 418.0774.

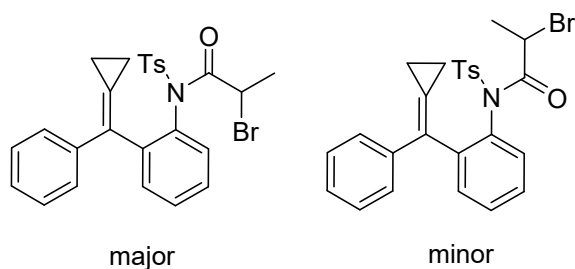

**2-bromo-*N*-(2-(cyclopropylidene(phenyl)methyl)phenyl)-*N*-tosylpropanamide (1v):** A white solid, 572 mg, 56% yield, major : minor = 6 : 1. M.p.: 188-190  $^\circ\text{C}$ . Eluent: PE/EA = 10/1.  $^1\text{H}$  NMR (400 MHz,  $\text{CDCl}_3$ , TMS)  $\delta$  7.89 (d,  $J = 8.4$  Hz, 2H), 7.70 - 7.59 (m, 2H), 7.58 - 7.52 (m, 2H), 7.40 - 7.35 (m, 2H), 7.31 (dd,  $J = 7.9, 2.6$  Hz, 4H), 7.22 - 7.17 (m, 1H), 3.50

(q,  $J = 6.5$  Hz, 1H) & 3.22 (q,  $J = 7.2$  Hz, 1H, *minor isomer*), 2.43 (d,  $J = 3.9$  Hz, 3H), 1.69 - 1.63 (m, 1H), 1.51 - 1.42 (m, 1H), 1.40 - 1.33 (m, 1H), 1.23 - 1.14 (m, 1H), 0.72 (d,  $J = 6.5$  Hz, 3H);  $^{13}\text{C}$  NMR (100 MHz,  $\text{CDCl}_3$ , TMS)  $\delta$  168.1, 144.9, 144.5, 143.3, 139.8, 135.6, 133.8, 132.8, 132.1, 130.7, 130.5, 129.6, 129.3, 129.2, 128.7, 128.5, 128.1, 127.2, 127.1, 126.8, 126.1, 40.3, 21.7, 19.6, 6.2 (*minor isomer*) & 4.4, 2.9 & 1.3 (*minor isomer*); IR (EtOH)  $\nu$  2976, 2927, 1696, 1440, 1358, 1173, 1147, 1086, 1046, 874, 812, 757, 696  $\text{cm}^{-1}$ ; HRMS (ESI)  $m/z$ :  $[\text{M}+\text{Na}]^+$  Calcd. for  $\text{C}_{26}\text{H}_{24}\text{NO}_3\text{NaSBr}$  532.0552; found 532.0544.

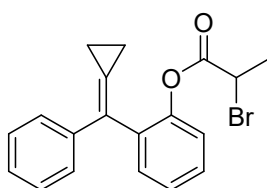

**2-(cyclopropylidene(phenyl)methyl)phenyl 2-bromopropanoate (1w):** A yellow oil, 580 mg, 81% yield. Eluent: PE/EA = 10/1.  $^1\text{H}$  NMR (400 MHz,  $\text{CDCl}_3$ , TMS)  $\delta$  7.43 - 7.36 (m, 4H), 7.34 - 7.29 (m, 1H), 7.26 (s, 2H), 7.23 - 7.18 (m, 1H), 7.15 (d,  $J = 8.3$  Hz, 1H), 4.01 (q,  $J = 6.9$  Hz, 1H), 1.61 - 1.56 (m, 1H), 1.54 (d,  $J = 6.3$  Hz, 1H), 1.49 (d,  $J = 7.0$  Hz, 3H), 1.30 - 1.17 (m, 2H);  $^{13}\text{C}$  NMR (150 MHz,  $\text{CDCl}_3$ , TMS)  $\delta$  168.1, 148.1, 139.8, 133.9, 131.6, 128.4, 128.2, 126.9, 126.7, 126.4, 122.2, 39.6, 21.2, 5.4, 2.1; IR (EtOH)  $\nu$  2977, 2935, 1747, 1641, 1442, 1336, 1215, 1185, 1140, 1073, 1045, 905, 878, 843, 767, 745  $\text{cm}^{-1}$ ; HRMS (ESI)  $m/z$ :  $[\text{M}+\text{Na}]^+$  Calcd. for  $\text{C}_{19}\text{H}_{17}\text{BrO}_2\text{Na}$  379.0306; found 379.0308.

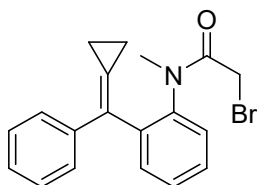

**2-bromo-N-(2-(cyclopropylidene(phenyl)methyl)phenyl)-N-methylacetamide (1x):** A white solid, 563 mg, 79% yield. M.p.: 125-127  $^\circ\text{C}$ , Eluent: PE/EA = 10/1.  $^1\text{H}$  NMR (400 MHz,  $\text{CDCl}_3$ , TMS)  $\delta$  7.48 - 7.40 (m, 3H), 7.33 - 7.19 (m, 6H), 3.52 (d,  $J = 11.3$  Hz, 1H), 3.32 (d,  $J = 11.2$  Hz, 1H), 2.72 (s, 3H), 1.58-1.45 (m, 2H), 1.26-1.19 (m, 2H);  $^{13}\text{C}$  NMR (150 MHz,  $\text{CDCl}_3$ , TMS)  $\delta$  166.2, 141.4, 140.2, 139.7, 132.1, 129.0, 128.8, 128.4, 128.1, 127.4, 126.9,

37.1, 27.6, 4.8, 2.3; IR (EtOH)  $\nu$  3052, 2966, 1665, 1593, 1484, 1445, 1433, 1379, 1300, 1099, 1074, 1047, 898, 773, 764, 753, 697  $\text{cm}^{-1}$ ; HRMS (ESI)  $m/z$ :  $[M+Na]^+$  Calcd. for  $\text{C}_{19}\text{H}_{18}\text{NONaBr}$  378.0464; found 378.0466.

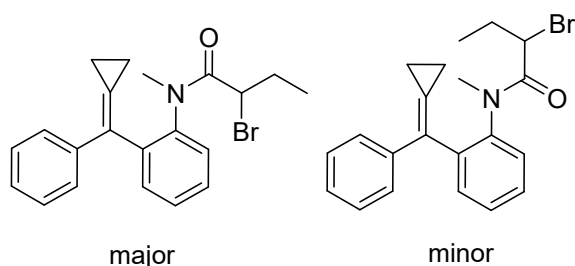

**2-bromo-N-(2-(cyclopropylidene(phenyl)methyl)phenyl)-N-methylbutanamide (1y):** A white solid, 620 mg, 81% yield, major : minor = 3 : 1. M.p.: 180-182 °C. Eluent: PE/EA = 10/1.  $^1\text{H}$  NMR (400 MHz,  $\text{CDCl}_3$ , TMS)  $\delta$  7.53 - 7.43 (m, 4H), 7.28 (s, 2H), 7.22 - 7.19 (m, 3H), 4.05 (t,  $J = 7.1$  Hz, 1H, *minor isomer*), 3.71 (dd,  $J = 10.0, 4.3$  Hz, 1H), 2.72 (s, 3H) & 2.49 (s, 3H, *minor isomer*), 1.90 - 1.76 (m, 2H), 1.49 (t,  $J = 7.8$  Hz, 2H), 1.40 - 1.22 (m, 2H), 1.21 - 1.06 (m, 2H), 0.75 (t,  $J = 7.2$  Hz, 3H);  $^{13}\text{C}$  NMR (100 MHz,  $\text{CDCl}_3$ , TMS,)  $\delta$  168.9, 141.2 (*minor isomer*) & 141.0, 140.6 (*minor isomer*), 140.5 (*minor isomer*), 140.1, 139.8, 132.0 (*minor isomer*) & 131.8, 128.9, 128.73, 128.70, 128.6, 128.5, 128.3, 128.1, 128.0, 127.2, 127.0, 126.8, 126.8, 126.6 (there are multiple peaks between 128.9 - 126.6 due to rotamers), 49.4 (*minor isomer*) & 48.0, 37.4 & 37.1 (*minor isomer*), 29.8 (*minor isomer*) & 27.1, 12.1 (*minor isomer*) & 11.7, 4.6 & 4.4 (*minor isomer*), 2.4 (*minor isomer*) & 2.2; IR (EtOH)  $\nu$  3055, 2972, 2930, 1661, 1596, 1486, 1446, 1424, 1384, 1340, 1302, 1076, 903, 765, 729, 696  $\text{cm}^{-1}$ ; HRMS (ESI)  $m/z$ :  $[M+Na]^+$  Calcd. for  $\text{C}_{21}\text{H}_{22}\text{NONaBr}$  406.0777; found 406.0782.

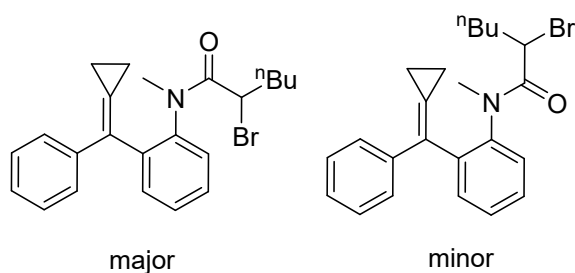

**2-bromo-N-(2-(cyclopropylidene(phenyl)methyl)phenyl)-N-methylhexanamide (1z):** A

light yellow oil, 480 mg, 58% yield, major : minor = 2 : 1.  $^1\text{H}$  NMR (400 MHz,  $\text{CDCl}_3$ , TMS, *major isomer*)  $\delta$  7.45 (t,  $J = 4.2$  Hz, 3H), 7.30 - 7.27 (m, 3H), 7.23 - 7.20 (m, 3H), 4.13 (dd,  $J = 8.5, 5.8$  Hz, 1H, *minor isomer*) & 3.75 (dd,  $J = 10.0, 4.3$  Hz, 1H), 2.72 (s, 3H) & 2.49 (s, 3H, *minor isomer*), 1.90 - 1.70 (m, 2H), 1.48 (t,  $J = 8.1$  Hz, 2H), 1.36 - 1.27 (m, 2H), 1.21 - 1.15 (m, 2H), 1.14 - 1.05 (m, 2H), 0.86 (t,  $J = 7.1$  Hz, 3H) & 0.74 (t,  $J = 7.1$  Hz, 3H, *minor isomer*);  $^{13}\text{C}$  NMR (150 MHz,  $\text{CDCl}_3$ , TMS)  $\delta$  169.1, 141.0, 140.2, 139.8, 132.1 (*minor isomer*) & 131.9, 129.0, 128.9, 128.8, 128.71, 128.66, 128.4, 128.2, 128.1, 127.3, 127.2, 127.1, 127.0, 126.7 (there are multiple peaks between 129.0 - 126.7 due to rotamers), 48.2 (*minor isomer*) & 46.6, 37.6 & 37.2 (*minor isomer*), 35.8 (*minor isomer*) & 33.9, 29.6 & 29.2 (*minor isomer*), 22.4 & 21.5 (*minor isomer*), 14.0 & 13.7 (*minor isomer*), 4.7 & 4.5 (*minor isomer*), 2.45 & 2.37 (*minor isomer*); IR (neat)  $\nu$  2956, 2929 2870, 1660, 1596, 1486, 1446, 1385, 1103, 908, 765, 751, 696  $\text{cm}^{-1}$ ; HRMS (ESI)  $m/z$ :  $[\text{M}+\text{Na}]^+$  Calcd. for  $\text{C}_{23}\text{H}_{26}\text{NONaBr}$  434.1090; found 434.1088.

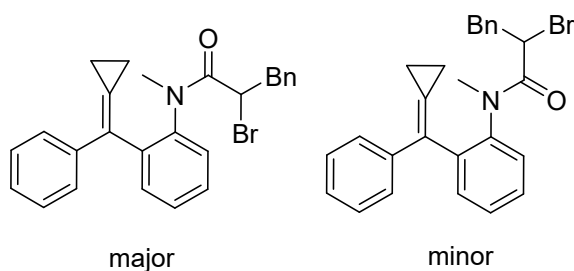

**2-bromo-N-(2-(cyclopropylidene(phenyl)methyl)phenyl)-N-methyl-3-**

**phenylpropanamide (1aa):** A white solid, 565 mg, 63% yield, major : minor = 5 : 3. M.p.: 213-215  $^{\circ}\text{C}$ . Eluent: PE/EA = 10/1.  $^1\text{H}$  NMR (400 MHz,  $\text{CDCl}_3$ , TMS)  $\delta$  7.48 - 7.41 (m, 3H), 7.25 - 7.20 (m, 6H), 7.08 - 7.02 (m, 2H), 6.87 (d,  $J = 6.5$  Hz, 2H), 5.87 (d,  $J = 7.9$  Hz, 1H), 4.20 (dd,  $J = 8.9, 6.6$  Hz, 1H) & 4.06 (dd,  $J = 9.4, 5.1$  Hz, 1H, *minor isomer*), 3.29 (dd,  $J = 13.3, 9.0$  Hz, 1H) & 3.09 (dd,  $J = 15.1, 9.5$  Hz, 1H, *minor isomer*), 2.96 (dd,  $J = 13.3, 6.5$  Hz, 1H), 2.75 (s, 3H, *minor isomer*) & 2.35 (s, 3H), 1.33 - 1.28 (m, 2H), 1.27 - 1.18 (m, 2H);  $^{13}\text{C}$  NMR (150 MHz,  $\text{CDCl}_3$ , TMS, *major isomer*)  $\delta$  168.5 (*minor isomer*) & 168.3, 140.87 (*minor isomer*) & 140.85, 140.76 & 140.6 (*minor isomer*), 140.3 & 139.7 (*minor isomer*), 137.6 (*minor isomer*) & 137.2, 131.9 (*minor isomer*) & 131.6, 129.5, 129.4, 129.1, 129.0,

128.9, 128.73, 128.69, 128.5, 128.4, 128.28, 128.25, 128.19, 128.04, 128.01, 127.21, 127.15, 127.0, 126.9, 126.8 (there are multiple peaks between 129.5 - 126.8 due to rotamers), 46.7 & 45.4 (*minor isomer*), 43.1 & 39.9 (*minor isomer*), 37.8 (*minor isomer*) & 37.1, 4.5 (*minor isomer*) & 4.4, 2.7 (*minor isomer*) & 2.6; IR (neat)  $\nu$  3029, 2928, 2958, 1664, 1493, 1445, 1373, 1229, 902, 774, 752, 700, 665  $\text{cm}^{-1}$ ; HRMS (ESI)  $m/z$ :  $[M+Na]^+$  Calcd. for  $\text{C}_{26}\text{H}_{24}\text{NONaBr}$  468.0933; found 468.0925.

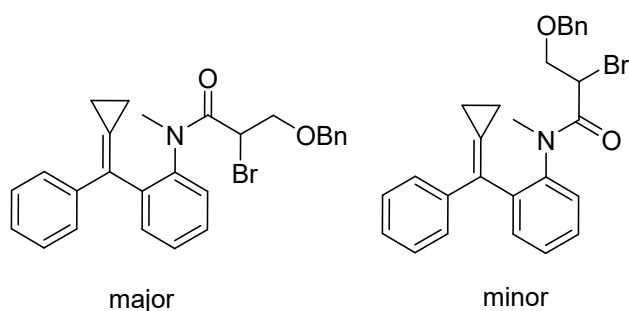

### 3-(benzyloxy)-2-bromo-N-(2-(cyclopropylidene(phenyl)methyl)phenyl)-N-

**methylpropanamide (1ab):** A brown oil, 423 mg, 44% yield, major : minor = 3 : 1. Eluent: PE/EA = 10/1.  $^1\text{H}$  NMR (400 MHz,  $\text{CDCl}_3$ , TMS, *major isomer*)  $\delta$  7.45 - 7.41 (m, 3H), 7.39 - 7.34 (m, 3H), 7.34 - 7.31 (m, 3H), 7.25 - 7.24 (m, 2H), 7.20 - 7.15 (m, 3H), 4.48 (s, 2H), 4.26 (dd,  $J = 8.4, 6.1$  Hz, 1H, *minor isomer*), 4.01 (dd,  $J = 8.4, 4.8$  Hz, 1H), 3.80 (dd,  $J = 9.8, 8.5$  Hz, 1H, *minor isomer*), 3.63 (dd,  $J = 10.8, 8.4$  Hz, 1H), 3.56 (dd,  $J = 9.8, 6.1$  Hz, 1H, *minor isomer*), 3.29 (dd,  $J = 10.8, 4.9$  Hz, 1H), 2.62 (s, 3H), 2.49 (s, 3H, *minor isomer*), 1.34 - 1.29 (m, 2H), 1.25 - 1.17 (m, 2H);  $^{13}\text{C}$  NMR (150 MHz,  $\text{CDCl}_3$ , TMS  $\delta$  167.4, 140.7, 140.4, 140.3, 137.5, 131.9, 129.0, 128.8, 128.6, 128.5, 128.4, 128.33, 128.26, 128.2, 128.1, 127.9, 127.8, 127.7, 127.2, 127.1, 126.9, 74.0 & 73.2 (*minor isomer*), 72.6 (*minor isomer*) & 71.3, 43.0 (*minor isomer*) & 42.8, 37.4 (*minor isomer*) & 37.0, 4.6 & 4.5 (*minor isomer*), 2.6 (*minor isomer*) & 2.1; IR (neat)  $\nu$  3074, 3024, 2920, 2867, 1769, 1659, 1452, 1112, 1075, 1027, 908, 729, 696  $\text{cm}^{-1}$ ; HRMS (ESI)  $m/z$ :  $[M+Na]^+$  Calcd. for  $\text{C}_{27}\text{H}_{26}\text{NO}_2\text{NaBr}$  498.1039; found 498.1037.

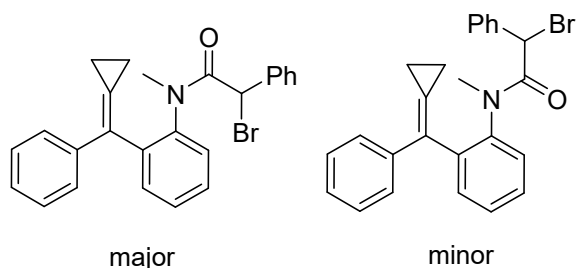

**2-bromo-N-(2-(cyclopropylidene(phenyl)methyl)phenyl)-N-methyl-2-phenylacetamide**

**(1ac):** A white solid, 445 mg, 51% yield, major : minor = 5 : 3. M.p.: 213-215 °C. Eluent: PE/EA = 10/1. <sup>1</sup>H NMR (400 MHz, CDCl<sub>3</sub>, TMS) δ 7.55 (d, *J* = 8.6 Hz, 1H), 7.50 - 7.41 (m, 2H), 7.32 (d, *J* = 4.3 Hz, 4H), 7.25 - 7.16 (m, 5H), 7.06 (dd, *J* = 7.6, 1.7 Hz, 2H), 6.62 (d, *J* = 7.8 Hz, 1H), 5.29 (s, 1H) & 5.22 (s, 1H, *minor isomer*), 2.70 (s, 3H, *minor isomer*) & 2.50 (s, 3H), 1.71 (td, *J* = 9.0, 5.5 Hz, 1H), 1.50 - 1.37 (m, 3H); <sup>13</sup>C NMR (150 MHz, CDCl<sub>3</sub>, TMS) δ 166.6, 141.0, 140.5, 140.3, 137.0, 131.9, 128.8, 128.75, 128.73, 128.6, 128.34, 128.30, 128.26, 128.1, 127.3, 127.1, 49.5, 37.3, 4.9, 2.3; IR (neat) ν 3065, 3026, 2974, 1663, 1596, 1485, 1446, 1373, 1103, 908, 765, 751, 726, 694 cm<sup>-1</sup>. HRMS (ESI) *m/z*: [M+Na]<sup>+</sup> Calcd. for C<sub>25</sub>H<sub>22</sub>NONaBr 454.0777; found 454.0770.

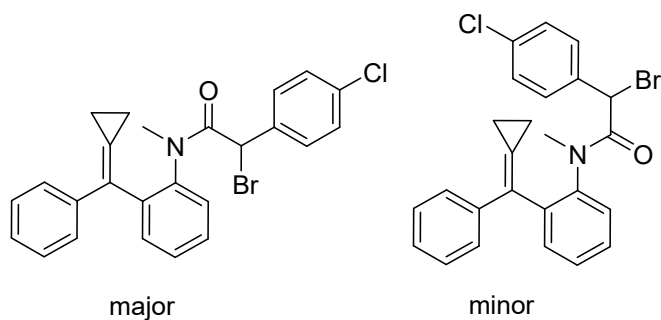

**2-bromo-2-(4-chlorophenyl)-N-(2-(cyclopropylidene(phenyl)methyl)phenyl)-N-**

**methylacetamide (1ad):** A white solid, 380 mg, 40% yield, major : minor = 4 : 1. M.p.: 210-212 °C. Eluent: PE/EA = 10/1. <sup>1</sup>H NMR (400 MHz, CDCl<sub>3</sub>, TMS, *major isomer*) δ 7.55 (d, *J* = 7.6 Hz, 1H), 7.50 - 7.42 (m, 2H), 7.31 (d, *J* = 6.1 Hz, 4H), 7.25 (s, 1H), 7.17 (d, *J* = 8.5 Hz, 2H), 7.00 (d, *J* = 8.5 Hz, 2H), 6.64 (dd, *J* = 7.9, 1.3 Hz, 1H), 5.25 (s, 1H) & 5.15 (s, 1H, *minor isomer*), 2.72 (s, 3H, *minor isomer*) & 2.49 (s, 3H), 1.75 - 1.66 (m, 1H), 1.52 - 1.40 (m, 2H), 1.32 - 1.23 (m, 1H); <sup>13</sup>C NMR (150 MHz, CDCl<sub>3</sub>, TMS) δ 166.3, 140.9, 140.41, 140.37, 135.6, 134.7, 132.0, 130.6, 129.6, 128.9, 128.83, 128.81, 128.7, 128.6, 128.4, 127.3, 127.1,

48.3, 37.3, 4.8, 2.3; IR (neat)  $\nu$  3066, 2973, 2931, 1664, 1488, 1373, 1091, 1015, 907, 832, 766, 750, 726, 696  $\text{cm}^{-1}$ . HRMS (ESI)  $m/z$ :  $[M+Na]^+$  Calcd. for  $\text{C}_{25}\text{H}_{21}\text{NONaClBr}$  488.0387; found 488.0383.

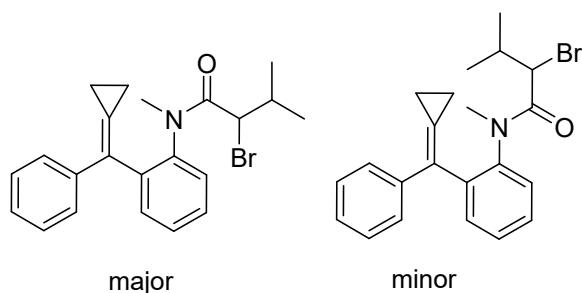

**2-bromo-N-(2-(cyclopropylidene(phenyl)methyl)phenyl)-N,3-dimethylbutanamide (1ae):**

A yellow oil, 326 mg, 41% yield, major : minor = 100 : 94. Eluent: PE/EA = 10/1.  $^1\text{H}$  NMR (400 MHz,  $\text{CDCl}_3$ , TMS)  $^1\text{H}$  NMR (400 MHz,  $\text{CDCl}_3$ )  $\delta$  7.52 (dd,  $J = 7.4, 1.9$  Hz, 1H), 7.47 - 7.36 (m, 6H), 7.29 (d,  $J = 5.6$  Hz, 5H), 7.24 - 7.17 (m, 4H), 7.09 (dd,  $J = 7.6, 1.5$  Hz, 1H), 3.94 (d,  $J = 7.3$  Hz, 1H, *minor isomer*), 3.55 (d,  $J = 9.3$  Hz, 1H), 2.60 (s, 3H), 2.48 (s, 3H, *minor isomer*), 2.18 - 2.04 (m, 1H, *minor isomer*), 1.96 (dq,  $J = 13.6, 6.7$  Hz, 1H), 1.52 (td,  $J = 8.4, 7.8, 4.6$  Hz, 1H), 1.46 - 1.38 (m, 2H), 1.35 (td,  $J = 8.2, 4.0$  Hz, 2H), 1.25 - 1.20 (m, 1H), 1.19 - 1.11 (m, 2H), 0.95 (d,  $J = 6.6$  Hz, 3H), 0.92 (d,  $J = 6.6$  Hz, 3H), 0.76 (d,  $J = 6.7$  Hz, 3H), 0.69 (d,  $J = 6.7$  Hz, 3H);  $^{13}\text{C}$  NMR (150 MHz,  $\text{CDCl}_3$ , TMS)  $\delta$  168.9, 168.6 (*minor isomer*), 141.3 (*minor isomer*), 141.0, 140.7, 140.4, 139.9 (*minor isomer*), 132.1 (*minor isomer*), 132.0, 129.6, 129.2, 129.0, 128.9, 128.7, 128.6, 128.6, 128.5, 128.3, 128.2, 127.3, 127.3, 127.1, 127.0, 126.9, 55.7 (*minor isomer*), 52.9, 37.8, 37.3 (*minor isomer*), 33.5 (*minor isomer*), 31.9, 20.7, 20.6 (*minor isomer*), 19.8 (*minor isomer*), 19.5, 4.6, 4.5 (*minor isomer*), 2.4 (*minor isomer*), 2.3; IR (neat)  $\nu$  2971, 2934, 2875, 1659, 1486, 1445, 1378, 909, 765, 751, 728, 696  $\text{cm}^{-1}$ ; HRMS (ESI)  $m/z$ :  $[M+Na]^+$  Calcd. for  $\text{C}_{22}\text{H}_{24}\text{NONaBr}$  420.0933; found 420.0934.

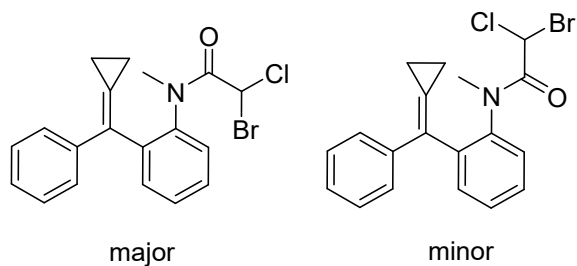

**2-bromo-2-chloro-N-(2-(cyclopropylidene(phenyl)methyl)phenyl)-N-methylacetamide**

**(1af):** A white solid, 473 mg, 60% yield, major : minor = 2 : 1. M.p.: 163-165 °C. Eluent: PE/EA = 10/1. <sup>1</sup>H NMR (400 MHz, CDCl<sub>3</sub>, TMS) δ 7.51 - 7.48 (m, 3H), 7.30 - 7.28 (m, 3H), 7.24 - 7.21 (m, 3H), 5.75 (s, 1H, *minor isomer*) & 5.69 (s, 1H), 2.58 (s, 3H), 1.47 - 1.36 (m, 2H), 1.31 - 1.23 (m, 2H); <sup>13</sup>C NMR (150 MHz, CDCl<sub>3</sub>, TMS) δ 164.1, 140.2, 140.0, 132.0, 129.4, 129.3, 128.45, 128.41, 128.0, 127.5, 127.0, 52.0 (*minor isomer*) & 50.4, 37.8 (*minor isomer*) & 37.7, 4.7, 2.4 (*minor isomer*) & 2.1; IR (neat) ν 3049, 2971, 1674, 1594, 1483, 1445, 1381, 1299, 1106, 794, 776, 766, 754, 698 cm<sup>-1</sup>; HRMS (ESI) m/z: [M+Na]<sup>+</sup> Calcd. for C<sub>19</sub>H<sub>17</sub>NONaClBr 412.0074; found 412.0072.



## 9. Characterization Data of Products.

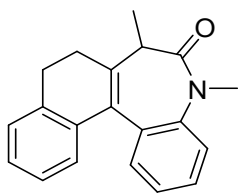

**5,7-dimethyl-5,7,8,9-tetrahydro-6H-benzo[b]naphtho[1,2-d]azepin-6-one (2a):** A white solid, 36 mg, 62% yield. m.p.: 176-178 °C. Eluent: PE/EA = 10/1. <sup>1</sup>H NMR (600 MHz, CDCl<sub>3</sub>, TMS) δ 7.46 (dd, *J* = 7.8, 1.6 Hz, 1H), 7.41 - 7.37 (m, 1H), 7.35 (dd, *J* = 8.3, 1.4 Hz, 1H), 7.22 - 7.17 (m, 2H), 7.14 (td, *J* = 7.3, 1.4 Hz, 1H), 7.10 (t, *J* = 7.5 Hz, 1H), 6.95 (d, *J* = 6.2 Hz, 1H), 3.37 (s, 3H), 3.00 (qd, *J* = 7.1, 2.4 Hz, 1H), 2.92 (td, *J* = 16.1, 6.3 Hz, 1H), 2.82 (dd, *J* = 14.1, 5.1 Hz, 1H), 2.63 (dd, *J* = 16.7, 4.4 Hz, 1H), 2.27 (tdd, *J* = 16.8, 6.1, 2.5 Hz, 1H), 1.39 (d, *J* = 7.0 Hz, 3H); <sup>13</sup>C NMR (150 MHz, CDCl<sub>3</sub>, TMS) δ 172.7, 142.8, 140.0, 136.0, 135.0, 131.7, 130.8, 130.2, 128.0, 127.4, 126.7, 126.4, 126.2, 123.9, 122.1, 40.1, 35.6, 28.2, 23.4, 12.6; IR (EtOH) ν 2971, 2879, 2830, 1651, 1601, 1445, 1366, 1090, 1046, 766, 735, 724, 651 cm<sup>-1</sup>; HRMS (ESI) *m/z*: [M+H]<sup>+</sup> Calcd. for C<sub>20</sub>H<sub>20</sub>NO 290.1539; found 290.1537.

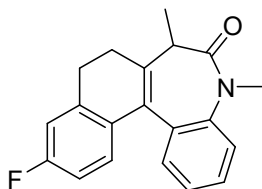

**11-fluoro-5,7-dimethyl-5,7,8,9-tetrahydro-6H-benzo[b]naphtho[1,2-d]azepin-6-one (2b):** A white solid, 30 mg, 48% yield. m.p. 135-137 °C. Eluent: PE/EA = 10/1. <sup>1</sup>H NMR (600 MHz, CDCl<sub>3</sub>, TMS) δ 7.44 - 7.38 (m, 2H), 7.35 (dd, *J* = 8.3, 1.4 Hz, 1H), 7.19 (ddd, *J* = 7.8, 7.1, 1.4 Hz, 1H), 6.94 - 6.89 (m, 2H), 6.78 (tdd, *J* = 8.5, 2.8, 1.0 Hz, 1H), 3.38 (s, 3H), 2.97 (qd, *J* = 7.0, 2.3 Hz, 1H), 2.89 (dd, *J* = 16.7, 5.9 Hz, 1H), 2.80 (dd, *J* = 16.3, 5.1 Hz, 1H), 2.62 (dd, *J* = 16.7, 6.4 Hz, 1H), 2.25 (tdd, *J* = 16.9, 6.0, 2.5 Hz, 1H), 1.39 (d, *J* = 7.1 Hz, 3H); <sup>13</sup>C NMR (150 MHz, CDCl<sub>3</sub>, TMS) δ 172.7, 161.4 (d, *J* = 245.5 Hz), 142.7, 139.0, 138.5 (d, *J* = 7.7 Hz), 131.5, 131.1 (d, *J* = 3.5 Hz), 130.0, 129.9, 128.1, 127.8 (d, *J* = 8.3 Hz), 123.9, 122.1, 114.4 (d, *J* = 21.3 Hz), 112.6 (d, *J* = 20.7 Hz), 39.9, 35.6, 28.3, 23.1, 12.6; <sup>19</sup>F NMR (564 MHz, CDCl<sub>3</sub>)

$\delta$  -115.6; IR (acetone)  $\nu$  2937, 1666, 1598, 1488, 1446, 1363, 1268, 1244, 1225, 1089, 922, 864, 765  $\text{cm}^{-1}$ ; HRMS (ESI)  $m/z$ :  $[M+H]^+$  Calcd. for  $\text{C}_{20}\text{H}_{19}\text{NOF}$  308.1445; found 308.1441.

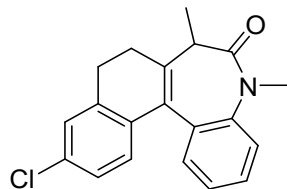

**11-chloro-5,7-dimethyl-5,7,8,9-tetrahydro-6H-benzo[b]naphtho[1,2-d]azepin-6-one (2c):**

A colorless oil, 38 mg, 58% yield. Eluent: PE/EA = 10/1. Containing trace amount of three-membered ring unopened by-product.  $^1\text{H}$  NMR (400 MHz,  $\text{CDCl}_3$ , TMS)  $\delta$  7.43 - 7.37 (m, 2H), 7.35 (dd,  $J$  = 8.6, 1.5 Hz, 1H), 7.22 - 7.16 (m, 2H), 7.08 - 7.03 (m, 1H), 6.88 (d,  $J$  = 8.3 Hz, 1H), 3.37 (s, 3H), 3.01 - 2.94 (m, 1H), 2.88 (dd,  $J$  = 15.5, 6.2 Hz, 1H), 2.79 (dd,  $J$  = 14.3, 5.2 Hz, 1H), 2.63 (dd,  $J$  = 17.1, 6.7 Hz, 1H), 2.25 (tdd,  $J$  = 16.8, 6.3, 2.5 Hz, 1H), 1.39 (d,  $J$  = 7.1 Hz, 3H);  $^{13}\text{C}$  NMR (150 MHz,  $\text{CDCl}_3$ , TMS)  $\delta$  172.6, 142.7, 140.2, 137.9, 133.5, 132.1, 131.3, 131.1, 129.9, 128.3, 127.6, 127.4, 126.2, 124.0, 122.2, 40.1, 35.7, 28.0, 23.2, 12.6; IR (neat)  $\nu$  2970, 2935, 2885, 1666, 1597, 1479, 1445, 1362, 1260, 1218, 1084, 1046, 879, 832, 758  $\text{cm}^{-1}$ ; HRMS (ESI)  $m/z$ :  $[M+H]^+$  Calcd. for  $\text{C}_{20}\text{H}_{19}\text{NOCl}$  324.1149; found 324.1153.

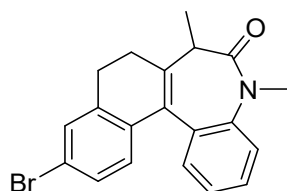

**11-bromo-5,7-dimethyl-5,7,8,9-tetrahydro-6H-benzo[b]naphtho[1,2-d]azepin-6-one (2d):**

A colorless oil, 40 mg, 54% yield. Eluent: PE/EA = 10/1. Containing trace amount of three-membered ring unopened by-product.  $^1\text{H}$  NMR (400 MHz,  $\text{CDCl}_3$ , TMS)  $\delta$  7.41 - 7.31 (m, 4H), 7.24 - 7.15 (m, 2H), 6.82 (d,  $J$  = 8.3 Hz, 1H), 3.37 (s, 3H), 2.96 (td,  $J$  = 9.8, 8.4 Hz, 1H), 2.88 (dd,  $J$  = 16.3, 5.6 Hz, 1H), 2.79 (dd,  $J$  = 15.4, 4.3 Hz, 1H), 2.62 (dd,  $J$  = 17.9, 5.6 Hz, 1H), 2.24 (tdd,  $J$  = 16.9, 6.2, 2.5 Hz, 1H), 1.39 (d,  $J$  = 7.1 Hz, 3H);  $^{13}\text{C}$  NMR (150 MHz,  $\text{CDCl}_3$ , TMS)  $\delta$  172.6, 142.8, 140.4, 138.2, 133.9, 131.3, 130.6, 130.3, 129.9, 129.2, 128.3, 127.9, 124.0, 122.2, 120.3, 40.2, 35.7, 27.9, 23.2, 12.6; IR (EtOH)  $\nu$  3050, 2940, 2870, 2820,

1663, 1597, 1478, 1446, 1361, 1265, 1228, 1121, 1095, 1002, 904, 822, 763, 730, 701  $\text{cm}^{-1}$ ;  
HRMS (ESI)  $m/z$ :  $[M+H]^+$  Calcd. for  $\text{C}_{20}\text{H}_{19}\text{NOBr}$  368.0644; found 368.0638.

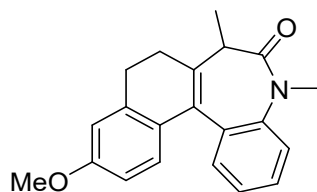

**11-methoxy-5,7-dimethyl-5,7,8,9-tetrahydro-6H-benzo[b]naphtho[1,2-d]azepin-6-one**

**(2e)**: A white solid, 41 mg, 64% yield, m.p.: 180-182 °C. Eluent: PE/EA = 10/1. Containing trace amount of three-membered ring unopened by-product.  $^1\text{H}$  NMR (400 MHz,  $\text{CDCl}_3$ , TMS)  $\delta$  7.45 (d,  $J = 6.2$  Hz, 1H), 7.40 - 7.32 (m, 2H), 7.21 - 7.15 (m, 1H), 6.89 (d,  $J = 8.5$  Hz, 1H), 6.79 - 6.75 (m, 1H), 6.63 (dd,  $J = 8.5, 2.7$  Hz, 1H), 3.80 (s, 3H), 3.36 (s, 3H), 3.00 - 2.85 (m, 2H), 2.78 (dd,  $J = 16.2, 5.1$  Hz, 1H), 2.60 (dd,  $J = 16.6, 6.3$  Hz, 1H), 2.25 (tdd,  $J = 16.8, 6.1, 2.5$  Hz, 1H), 1.38 (d,  $J = 7.0$  Hz, 3H);  $^{13}\text{C}$  NMR (150 MHz,  $\text{CDCl}_3$ , TMS)  $\delta$  172.9, 158.4, 142.7, 137.9, 137.4, 131.9, 130.7, 130.4, 130.1, 127.9, 127.5, 123.8, 122.1, 113.4, 111.0, 55.3, 39.9, 35.7, 30.3, 28.7, 23.3, 12.7; IR (EtOH)  $\nu$  3057, 2935, 2831, 1662, 1597, 1488, 1451, 1364, 1251, 1227, 1092, 1035, 763, 732, 654  $\text{cm}^{-1}$ ; HRMS (ESI)  $m/z$ :  $[M+H]^+$  Calcd. for  $\text{C}_{21}\text{H}_{22}\text{NO}_2$  320.1645; found 320.1646.

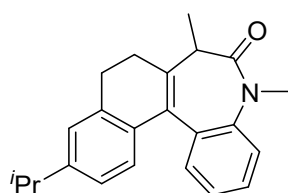

**11-isopropyl-5,7-dimethyl-5,7,8,9-tetrahydro-6H-benzo[b]naphtho[1,2-d]azepin-6-one**

**(2f)**: A colorless oil, 42 mg, 63% yield. Eluent: PE/EA = 10/1.  $^1\text{H}$  NMR (400 MHz,  $\text{CDCl}_3$ , TMS)  $\delta$  7.48 (dd,  $J = 7.8, 1.6$  Hz, 1H), 7.42 - 7.30 (m, 2H), 7.22 - 7.14 (m, 1H), 7.07 (s, 1H), 6.97 (d,  $J = 6.0$  Hz, 1H), 6.89 (d,  $J = 8.0$  Hz, 1H), 3.34 (s, 3H), 3.02 - 2.94 (m, 1H), 2.87 (t,  $J = 6.9$  Hz, 1H), 2.81 (dd,  $J = 15.1, 4.2$  Hz, 1H), 2.62 (dd,  $J = 16.0, 5.4$  Hz, 1H), 2.26 (tdd,  $J = 16.9, 6.3, 2.4$  Hz, 1H), 1.38 (d,  $J = 7.1$  Hz, 3H), 1.25 (d,  $J = 5.9$  Hz, 6H);  $^{13}\text{C}$  NMR (100 MHz,  $\text{CDCl}_3$ , TMS)  $\delta$  172.8, 147.6, 142.7, 139.0, 136.0, 132.7, 131.8, 130.7, 130.2, 127.9, 126.3,

125.7, 124.1, 123.8, 122.1, 40.0, 35.6, 33.8, 28.9, 28.4, 24.0, 23.5, 12.6; IR (acetone)  $\nu$  2957, 2924, 2866, 1666, 1597, 1488, 1445, 1361, 1300, 1220, 1118, 1091, 832, 762, 742  $\text{cm}^{-1}$ ; HRMS (ESI)  $m/z$ :  $[M+H]^+$  Calcd. for  $\text{C}_{23}\text{H}_{26}\text{NO}$  332.2008; found 332.2006.

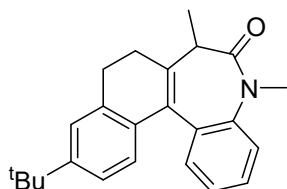

**11-(tert-butyl)-5,7-dimethyl-5,7,8,9-tetrahydro-6H-benzo[b]naphtho[1,2-d]azepin-6-one (2g):** A colorless oil, 50 mg, 72% yield. Eluent: PE/EA = 10/1.  $^1\text{H}$  NMR (400 MHz,  $\text{CDCl}_3$ , TMS)  $\delta$  7.49 (dd,  $J = 7.8, 1.6$  Hz, 1H), 7.41 - 7.36 (m, 1H), 7.34 (dd,  $J = 8.3, 1.5$  Hz, 1H), 7.23 (s, 1H), 7.21 - 7.15 (m, 1H), 7.13 (dd,  $J = 8.2, 1.3$  Hz, 1H), 6.91 (d,  $J = 8.2$  Hz, 1H), 3.34 (s, 3H), 2.99 (td,  $J = 7.0, 2.3$  Hz, 1H), 2.92 (dd,  $J = 16.5, 6.5$  Hz, 1H), 2.82 (dd,  $J = 16.1, 5.2$  Hz, 1H), 2.62 (dd,  $J = 16.8, 4.3$  Hz, 1H), 2.27 (tdd,  $J = 16.8, 6.2, 2.5$  Hz, 1H), 1.39 (d,  $J = 7.1$  Hz, 3H), 1.32 (s, 9H);  $^{13}\text{C}$  NMR (150 MHz,  $\text{CDCl}_3$ , TMS)  $\delta$  172.7, 149.8, 142.7, 139.1, 135.6, 132.3, 131.8, 130.6, 130.2, 128.0, 126.0, 124.6, 123.8, 123.0, 122.1, 40.1, 35.6, 34.5, 31.3, 28.6, 23.6, 12.6; IR (EtOH)  $\nu$  2965, 1648, 1589, 1440, 1364, 1267, 1085, 1047, 880, 762, 742  $\text{cm}^{-1}$ ; HRMS (ESI)  $m/z$ :  $[M+H]^+$  Calcd. for  $\text{C}_{24}\text{H}_{28}\text{NO}$  346.2165; found 346.2169.

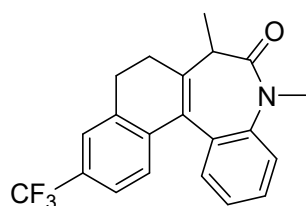

**5,7-dimethyl-11-(trifluoromethyl)-5,7,8,9-tetrahydro-6H-benzo[b]naphtho[1,2-d]azepin-6-one (2h):** A pale green oil, 37 mg, 52% yield. Eluent: PE/EA = 10/1. Containing trace amount of three-membered ring unopened by-product.  $^1\text{H}$  NMR (400 MHz,  $\text{CDCl}_3$ , TMS)  $\delta$  7.59 (s, 1H), 7.46 - 7.40 (m, 2H), 7.39 (d,  $J = 5.8$  Hz, 1H), 7.35 (d,  $J = 9.8$  Hz, 1H), 7.21 (ddd,  $J = 8.2, 6.9, 1.5$  Hz, 1H), 7.05 (d,  $J = 8.0$  Hz, 1H), 3.38 (s, 3H), 3.09 - 2.98 (m, 1H), 2.98 - 2.85 (m, 2H), 2.74 - 2.63 (m, 1H), 2.36 - 2.22 (m, 1H), 1.41 (d,  $J = 6.9$  Hz, 3H);  $^{13}\text{C}$  NMR (150 MHz,  $\text{CDCl}_3$ , TMS)  $\delta$  172.4, 142.8, 142.5, 136.5, 131.1, 130.2, 130.0, 129.9, 128.5,

128.4 (q,  $J = 32.4$  Hz), 126.4, 124.23 (q,  $J = 272.3$  Hz), 124.15 (q,  $J = 4.2$  Hz), 124.14, 123.2 (q,  $J = 4.2$  Hz), 122.3, 40.4, 35.7, 27.9, 23.2, 12.6;  $^{19}\text{F}$  NMR (564 MHz,  $\text{CDCl}_3$ )  $\delta$  -62.4; IR (neat)  $\nu$  3063, 2940, 1667, 1598, 1448, 1360, 1323, 1277, 1160, 1100, 1096, 1071, 901, 837, 763, 735  $\text{cm}^{-1}$ ; HRMS (ESI)  $m/z$ :  $[\text{M}+\text{H}]^+$  Calcd. for  $\text{C}_{21}\text{H}_{19}\text{NOF}_3$  358.1413; found 358.1407.

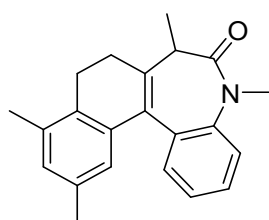

**5,7,10,12-tetramethyl-5,7,8,9-tetrahydro-6H-benzo[b]naphtho[1,2-d]azepin-6-one (2i):** A white solid, 46 mg, 74% yield, m.p.: 183-185 °C. Eluent: PE/EA = 10/1.  $^1\text{H}$  NMR (400 MHz,  $\text{CDCl}_3$ , TMS)  $\delta$  7.45 - 7.32 (m, 3H), 7.18 (t,  $J = 6.6$  Hz, 1H), 6.87 (s, 1H), 6.62 (s, 1H), 3.36 (s, 3H), 3.04 - 2.93 (m, 2H), 2.68 - 2.51 (m, 2H), 2.31 (s, 3H), 2.31 - 2.14(m, 1H), 2.19 (s, 3H), 1.39 (d,  $J = 7.1$  Hz, 3H);  $^{13}\text{C}$  NMR (100 MHz,  $\text{CDCl}_3$ , TMS)  $\delta$  172.8, 142.7, 139.6, 134.84, 134.82, 134.5, 132.2, 131.2, 131.0, 130.3, 129.6, 127.8, 125.2, 123.8, 122.0, 40.0, 35.6, 23.5, 23.2, 21.0, 19.5, 12.5; IR (neat)  $\nu$  2946, 2828, 1659, 1598, 1445, 1365, 1221, 1107, 1047, 907, 857, 764, 750  $\text{cm}^{-1}$ ; HRMS (ESI)  $m/z$ :  $[\text{M}+\text{H}]^+$  Calcd. for  $\text{C}_{22}\text{H}_{24}\text{NO}$  318.1852; found 318.1852.

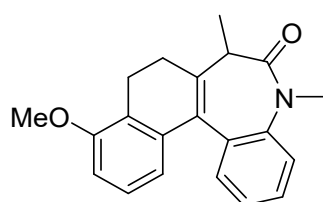

**12-methoxy-5,7-dimethyl-5,7,8,9-tetrahydro-6H-benzo[b]naphtho[1,2-d]azepin-6-one (2j):** A yellow oil, 30 mg, 47% yield. Eluent: PE/EA = 10/1. Containing trace amount of three-membered ring unopened by-product.  $^1\text{H}$  NMR (400 MHz,  $\text{CDCl}_3$ , TMS)  $\delta$  7.47 (d,  $J = 7.9$  Hz, 1H), 7.37 - 7.32 (m, 1H), 7.22 - 7.15 (m, 1H), 7.12 (d,  $J = 8.2$  Hz, 1H), 7.04 (d,  $J = 7.8$  Hz, 1H), 6.70 (dd,  $J = 8.2, 2.7$  Hz, 1H), 6.53 (d,  $J = 2.6$  Hz, 1H), 3.70 (s, 3H), 3.36 (s, 3H), 3.05 - 2.95 (m, 1H), 2.87 - 2.73 (m, 2H), 2.62 (dd,  $J = 15.7, 4.7$  Hz, 1H), 2.23 (tdd,  $J = 16.4, 6.9, 2.5$  Hz, 1H), 1.39 (d,  $J = 7.1$  Hz, 3H);  $^{13}\text{C}$  NMR (150 MHz,  $\text{CDCl}_3$ , TMS)  $\delta$  172.7, 158.1,

142.7, 140.7, 136.0, 131.6, 130.8, 130.1, 128.3, 128.1, 128.0, 124.0, 122.1, 113.3, 111.0, 76.8, 55.3, 40.2, 35.6, 27.3, 23.7, 12.6; IR (EtOH)  $\nu$  2936, 2836, 1663, 1597, 1489, 1453, 1361, 1302, 1213, 1117, 1043, 908, 807, 785, 763  $\text{cm}^{-1}$ ; HRMS (ESI)  $m/z$ :  $[M+H]^+$  Calcd. for  $\text{C}_{21}\text{H}_{22}\text{NO}_2$  320.1645; found 320.1640.

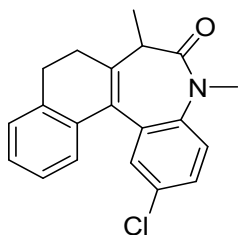

**2-chloro-5,7-dimethyl-5,7,8,9-tetrahydro-6H-benzo[b]naphtho[1,2-d]azepin-6-one (2m):**

A pale yellow oil, 41 mg, 63% yield. Eluent: PE/EA = 10/1. Containing trace amount of three-membered ring unopened by-product.  $^1\text{H}$  NMR (400 MHz,  $\text{CDCl}_3$ , TMS)  $\delta$  7.45 (d,  $J$  = 2.5 Hz, 1H), 7.36 (dd,  $J$  = 8.8, 2.5 Hz, 1H), 7.28 (d,  $J$  = 8.8 Hz, 1H), 7.23 - 7.12 (m, 3H), 6.99 - 6.92 (m, 1H), 3.34 (s, 3H), 2.97 (td,  $J$  = 8.4, 5.4 Hz, 1H), 2.92 - 2.78 (m, 2H), 2.63 (dd,  $J$  = 16.9, 4.1 Hz, 1H), 2.25 (tdd,  $J$  = 16.8, 6.5, 2.5 Hz, 1H), 1.40 (d,  $J$  = 7.1 Hz, 3H);  $^{13}\text{C}$  NMR (150 MHz,  $\text{CDCl}_3$ , TMS)  $\delta$  172.4, 141.3, 140.9, 136.0, 134.4, 133.3, 130.1, 129.7, 129.4, 128.2, 127.5, 127.1, 126.5, 126.1, 123.5, 40.2, 35.7, 28.1, 23.5, 12.6; IR (EtOH)  $\nu$  3073, 2935, 2880, 1667, 1479, 1450, 1401, 1354, 1296, 1221, 1104, 907, 818, 767, 728, 704  $\text{cm}^{-1}$ ; HRMS (ESI)  $m/z$ :  $[M+H]^+$  Calcd. for  $\text{C}_{20}\text{H}_{19}\text{NOCl}$  324.1149; found 324.1143.

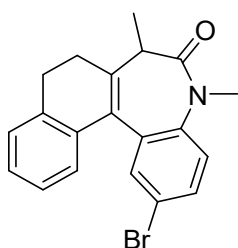

**2-bromo-5,7-dimethyl-5,7,8,9-tetrahydro-6H-benzo[b]naphtho[1,2-d]azepin-6-one (2n):**

A yellow oil, 45 mg, 61% yield. Eluent: PE/EA = 10/1. Containing trace amount of three-membered ring unopened by-product.  $^1\text{H}$  NMR (400 MHz,  $\text{CDCl}_3$ , TMS)  $\delta$  7.60 (d,  $J$  = 2.4 Hz, 1H), 7.49 (dd,  $J$  = 8.7, 2.4 Hz, 1H), 7.24 - 7.14 (m, 4H), 6.97 - 6.92 (m, 1H), 3.34 (s, 3H), 3.01 - 2.93 (m, 1H), 2.92 - 2.77 (m, 2H), 2.63 (dd,  $J$  = 16.9, 6.2 Hz, 1H), 2.25 (tdd,  $J$  = 16.8,

6.5, 2.5 Hz, 1H), 1.39 (d,  $J = 7.1$  Hz, 3H);  $^{13}\text{C}$  NMR (150 MHz,  $\text{CDCl}_3$ , TMS)  $\delta$  172.4, 141.7, 141.0, 136.0, 134.4, 133.7, 132.7, 131.1, 130.0, 127.5, 127.1, 126.5, 126.1, 123.8, 117.1, 40.2, 35.6, 28.1, 23.5, 12.6; IR (neat)  $\nu$  2971, 2945, 2878, 2819, 1662, 1478, 1398, 1352, 1297, 1114, 1095, 906, 817, 788, 656  $\text{cm}^{-1}$ ; HRMS (ESI)  $m/z$ :  $[\text{M}+\text{H}]^+$  Calcd. for  $\text{C}_{20}\text{H}_{19}\text{NOBr}$  368.0644; found 368.0638.

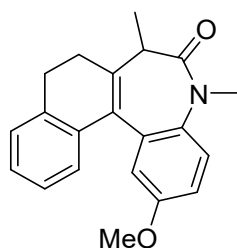

**2-methoxy-5,7-dimethyl-5,7,8,9-tetrahydro-6H-benzo[b]naphtho[1,2-d]azepin-6-one (2o):**

A light green oil, 38 mg, 60% yield. Eluent: PE/EA = 10/1. Containing trace amount of three-membered ring unopened by-product.  $^1\text{H}$  NMR (400 MHz,  $\text{CDCl}_3$ , TMS)  $\delta$  7.28 - 7.24 (m, 1H), 7.20 (d,  $J = 6.9$  Hz, 1H), 7.17 - 7.08 (m, 2H), 7.04 (dd,  $J = 7.3, 1.8$  Hz, 1H), 6.99 - 6.92 (m, 2H), 3.77 (s, 3H), 3.32 (s, 3H), 3.04 (qd,  $J = 7.1, 2.3$  Hz, 1H), 2.92 (td,  $J = 16.0, 6.2$  Hz, 1H), 2.82 (ddd,  $J = 15.2, 6.3, 2.1$  Hz, 1H), 2.62 (ddd,  $J = 17.0, 6.5, 2.2$  Hz, 1H), 2.25 (tdd,  $J = 16.8, 6.3, 2.5$  Hz, 1H), 1.38 (d,  $J = 7.1$  Hz, 3H);  $^{13}\text{C}$  NMR (150 MHz,  $\text{CDCl}_3$ )  $\delta$  172.6, 155.5, 140.2, 136.5, 136.0, 134.9, 132.8, 130.7, 127.5, 126.7, 126.3, 126.2, 123.4, 115.3, 113.3, 55.6, 40.1, 35.7, 28.2, 23.4, 12.7; IR (neat)  $\nu$  2928, 2830, 1659, 1496, 1461, 1415, 1284, 1222, 1114, 1041, 907, 767, 728  $\text{cm}^{-1}$ ; HRMS (ESI)  $m/z$ :  $[\text{M}+\text{H}]^+$  Calcd. for  $\text{C}_{21}\text{H}_{22}\text{NO}_2$  320.1645; found 320.1652.

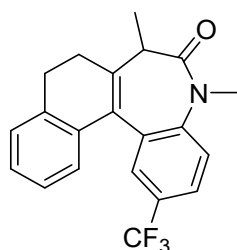

**5,7-dimethyl-2-(trifluoromethyl)-5,7,8,9-tetrahydro-6H-benzo[b]naphtho[1,2-d]azepin-6-one(2p):** A light green oil, 42 mg, 59% yield. Eluent: PE/EA = 10/1. Containing trace

amount of three-membered ring unopened by-product.  $^1\text{H}$  NMR (400 MHz,  $\text{CDCl}_3$ , TMS)  $\delta$  7.76 (s, 1H), 7.64 (d,  $J = 8.6$  Hz, 1H), 7.46 (d,  $J = 8.6$  Hz, 1H), 7.24 - 7.09 (m, 3H), 6.86 (d,  $J = 7.5$  Hz, 1H), 3.39 (s, 3H), 3.00 - 2.89 (m, 2H), 2.85 (ddd,  $J = 15.3, 6.5, 2.1$  Hz, 1H), 2.66 (ddd,  $J = 16.8, 6.2, 2.1$  Hz, 1H), 2.28 (tdd,  $J = 16.8, 6.4, 2.5$  Hz, 1H), 1.41 (d,  $J = 7.1$  Hz, 3H);  $^{13}\text{C}$  NMR (150 MHz,  $\text{CDCl}_3$ , TMS)  $\delta$  172.5, 145.2, 141.2, 136.0, 134.4, 132.0, 130.3, 127.7, 127.6 (q,  $J = 4.1$  Hz), 127.2, 126.6, 126.008 (q,  $J = 33.8$  Hz), 126.005, 124.8 (q,  $J = 4.1$  Hz), 123.9 (q,  $J = 270.9$  Hz), 122.6, 40.3, 35.7, 28.0, 23.5, 12.6;  $^{19}\text{F}$  NMR (564 MHz,  $\text{CDCl}_3$ )  $\delta$  -62.2; IR (EtOH)  $\nu$  2972, 2881, 1697, 1381, 1310, 1137, 1087, 1045, 879, 803; HRMS (ESI)  $m/z$ :  $[\text{M}+\text{H}]^+$  Calcd. for  $\text{C}_{21}\text{H}_{19}\text{NOF}_3$  358.1413; found 358.1412.

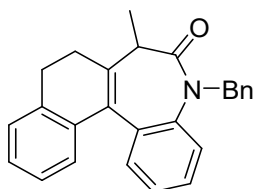

**5-benzyl-7-methyl-5,7,8,9-tetrahydro-6H-benzo[b]naphtho[1,2-d]azepin-6-one (2q):** A green oil, 38 mg, 52% yield. Eluent: PE/EA = 10/1.  $^1\text{H}$  NMR (400 MHz,  $\text{CDCl}_3$ , TMS)  $\delta$  7.37 (t,  $J = 7.7$  Hz, 2H), 7.29 (d,  $J = 7.3$  Hz, 1H), 7.19 (d,  $J = 7.3$  Hz, 1H), 7.15 - 7.08 (m, 2H), 7.05 - 6.93 (m, 4H), 6.89 (d,  $J = 7.1$  Hz, 2H), 6.61 (d,  $J = 7.7$  Hz, 1H), 5.57 (d,  $J = 15.4$  Hz, 1H), 4.74 (d,  $J = 15.5$  Hz, 1H), 3.12 (qd,  $J = 6.9, 2.3$  Hz, 1H), 2.92 (td,  $J = 15.9, 6.2$  Hz, 1H), 2.82 (ddd,  $J = 15.2, 6.3, 2.0$  Hz, 1H), 2.64 (ddd,  $J = 16.7, 6.2, 2.0$  Hz, 1H), 2.27 (tdd,  $J = 16.8, 6.3, 2.5$  Hz, 1H), 1.44 (d,  $J = 7.0$  Hz, 3H);  $^{13}\text{C}$  NMR (150 MHz,  $\text{CDCl}_3$ , TMS)  $\delta$  172.2, 141.0, 139.8, 137.4, 135.942, 135.935, 134.6, 133.4, 131.3, 130.0, 128.3, 127.9, 127.2, 127.1, 126.8, 126.7, 126.6, 126.1, 124.4, 123.0, 50.6, 40.2, 28.2, 23.4, 12.6; IR (EtOH)  $\nu$  3026, 2937, 2869, 1663, 1597, 1483, 1447, 1375, 1295, 1192, 767, 749, 725, 697  $\text{cm}^{-1}$ ; HRMS (ESI)  $m/z$ :  $[\text{M}+\text{Na}]^+$  Calcd. for  $\text{C}_{26}\text{H}_{23}\text{NONa}$  388.1671; found 388.1680.

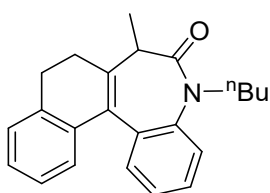



**5-butyl-7-methyl-5,7,8,9-tetrahydro-6H-benzo[b]naphtho[1,2-d]azepin-6-one (2r):** A pale yellow oil, 35 mg, 53% yield. Eluent: PE/EA = 10/1.  $^1\text{H}$  NMR (400 MHz,  $\text{CDCl}_3$ , TMS)  $\delta$  7.47 - 7.33 (m, 3H), 7.23 - 7.06 (m, 4H), 6.93 (d,  $J = 7.5$  Hz, 1H), 4.37 (dt,  $J = 13.6, 7.7$  Hz, 1H), 3.57 - 3.48 (m, 1H), 2.98 (qt,  $J = 7.0, 3.7$  Hz, 1H), 2.89 (dd,  $J = 16.3, 6.2$  Hz, 1H), 2.82 (dd,  $J = 15.2, 4.3$  Hz, 1H), 2.61 (dd,  $J = 16.8, 4.2$  Hz, 1H), 2.24 (tdd,  $J = 16.8, 6.4, 2.5$  Hz, 1H), 1.38 (d,  $J = 7.0$  Hz, 3H), 1.34 - 1.27 (m, 2H), 1.10 - 0.94 (m, 2H), 0.64 (t,  $J = 7.3$  Hz, 3H);  $^{13}\text{C}$  NMR (150 MHz,  $\text{CDCl}_3$ , TMS)  $\delta$  172.0, 141.3, 140.2, 136.0, 134.9, 133.3, 130.9, 130.0, 128.0, 127.3, 126.6, 126.2, 124.2, 123.1, 47.1, 40.3, 30.0, 28.2, 23.3, 19.6, 13.6, 12.5; IR (acetone)  $\nu$  2956 2932, 2872, 1663, 1597, 1483, 1447, 1483, 1447, 1375, 1222, 1205, 1092, 1092, 766, 751, 730  $\text{cm}^{-1}$ ; HRMS (ESI)  $m/z$ :  $[\text{M}+\text{H}]^+$  Calcd. for  $\text{C}_{23}\text{H}_{26}\text{NO}$  332.2008; found 332.2011.

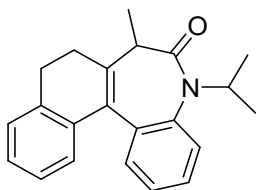

**5-isopropyl-7-methyl-5,7,8,9-tetrahydro-6H-benzo[b]naphtho[1,2-d]azepin-6-one (2s):** A colorless oil, 32 mg, 51% yield. Eluent: PE/EA = 10/1.  $^1\text{H}$  NMR (400 MHz,  $\text{CDCl}_3$ , TMS)  $\delta$  7.47 - 7.37 (m, 2H), 7.34 (td,  $J = 8.2, 7.6, 1.6$  Hz, 1H), 7.25 - 7.18 (m, 2H), 7.17 - 7.08 (m, 2H), 6.97 (d,  $J = 7.3$  Hz, 1H), 4.59 - 4.54 (m, 1H), 2.98 (qd,  $J = 7.1, 2.4$  Hz, 1H), 2.94 - 2.77 (m, 2H), 2.59 (dd,  $J = 15.8, 5.3$  Hz, 1H), 2.26 (tdd,  $J = 16.8, 6.5, 2.5$  Hz, 1H), 1.42 (d,  $J = 6.8$  Hz, 3H), 1.37 (d,  $J = 7.0$  Hz, 3H), 0.99 (d,  $J = 7.0$  Hz, 3H);  $^{13}\text{C}$  NMR (150 MHz,  $\text{CDCl}_3$ , TMS)  $\delta$  172.3, 140.4, 140.2, 136.0, 135.0, 134.2, 130.8, 129.8, 127.4, 127.2, 126.7, 126.3, 126.1, 125.0, 124.8, 50.2, 41.0, 28.1, 23.4, 22.5, 20.7, 12.4; IR (EtOH)  $\nu$  2972, 2928, 2867, 1647, 1591, 1483, 1448, 1378, 1295, 1087, 1046, 879, 766, 731  $\text{cm}^{-1}$ ; HRMS (ESI)  $m/z$ :  $[\text{M}+\text{H}]^+$  Calcd. for  $\text{C}_{22}\text{H}_{24}\text{NO}$  318.1852; found 318.1845.

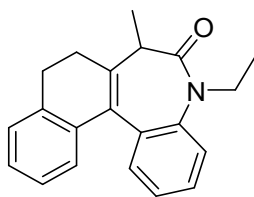

**5-ethyl-7-methyl-5,7,8,9-tetrahydro-6H-benzo[b]naphtho[1,2-d]azepin-6-one (2t):** A brown oil, 32 mg, 52% yield. Eluent: PE/EA = 10/1. Containing trace amount of three-membered ring unopened by-product.  $^1\text{H}$  NMR (400 MHz,  $\text{CDCl}_3$ , TMS)  $\delta$  7.44 (d,  $J = 7.6$  Hz, 1H), 7.42 - 7.35 (m, 2H), 7.20 (d,  $J = 7.5$  Hz, 2H), 7.17 - 7.07 (m, 2H), 6.95 (d,  $J = 5.9$  Hz, 1H), 4.31 (dq,  $J = 14.2, 7.2$  Hz, 1H), 3.60 (dq,  $J = 13.9, 7.0$  Hz, 1H), 2.98 (qd,  $J = 7.2, 2.5$  Hz, 1H), 2.89 (dd,  $J = 16.3, 6.1$  Hz, 1H), 2.82 (dd,  $J = 15.2, 4.4$  Hz, 1H), 2.61 (dd,  $J = 14.9, 6.3$  Hz, 1H), 2.25 (tdd,  $J = 16.8, 6.4, 2.4$  Hz, 1H), 1.39 (d,  $J = 7.0$  Hz, 3H), 0.93 (t,  $J = 7.1$  Hz, 3H);  $^{13}\text{C}$  NMR (150 MHz,  $\text{CDCl}_3$ , TMS)  $\delta$  171.4, 141.1, 140.1, 136.1, 135.1, 133.3, 130.8, 130.0, 128.0, 127.4, 126.7, 126.3, 126.2, 124.3, 123.1, 43.0, 40.3, 28.1, 23.3, 13.1, 12.5; IR (neat)  $\nu$  2956, 2931, 2872, 2830, 1659, 1596, 1482, 1446, 1376, 1277, 1295, 1221, 909, 788, 750, 726  $\text{cm}^{-1}$ ; HRMS (ESI)  $m/z$ :  $[\text{M}+\text{H}]^+$  Calcd. for  $\text{C}_{21}\text{H}_{22}\text{NO}$  304.1695; found 304.1691.

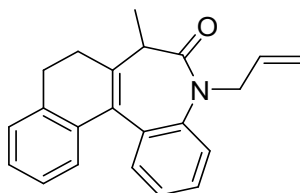

**5-allyl-7-methyl-5,7,8,9-tetrahydro-6H-benzo[b]naphtho[1,2-d]azepin-6-one (2u):** A light green oil, 34 mg, 54% yield. Eluent: PE/EA = 10/1.  $^1\text{H}$  NMR (400 MHz,  $\text{CDCl}_3$ )  $\delta$  7.43 (ddd,  $J = 8.2, 4.9, 1.5$  Hz, 2H), 7.36 (ddd,  $J = 8.4, 7.1, 1.6$  Hz, 1H), 7.22 - 7.07 (m, 4H), 6.93 (dd,  $J = 7.5, 1.5$  Hz, 1H), 5.78 - 5.64 (m, 1H), 5.01 (dd,  $J = 7.1, 1.5$  Hz, 1H), 4.98 (t,  $J = 1.6$  Hz, 1H), 4.62 (ddt,  $J = 16.0, 5.0, 1.7$  Hz, 1H), 4.35 (ddt,  $J = 15.9, 5.6, 1.6$  Hz, 1H), 3.04 (qd,  $J = 7.1, 2.4$  Hz, 1H), 2.92 (td,  $J = 15.9, 6.2$  Hz, 1H), 2.82 (ddd,  $J = 15.2, 6.3, 2.1$  Hz, 1H), 2.62 (ddd,  $J = 16.4, 6.1, 1.7$  Hz, 1H), 2.26 (tdd,  $J = 16.8, 6.3, 2.5$  Hz, 1H), 1.41 (d,  $J = 7.1$  Hz, 3H).  $^{13}\text{C}$  NMR (150 MHz,  $\text{CDCl}_3$ , TMS)  $\delta$  171.8, 141.6, 140.1, 136.1, 135.0, 133.7, 132.7, 131.1, 130.1, 129.7, 128.0, 127.45, 127.37, 126.7, 126.4, 126.2, 124.2, 122.7, 116.3, 50.6, 40.2, 28.2, 23.4, 12.6; IR (neat)  $\nu$  3055, 2968, 2940, 2884, 1652, 1597, 1490, 1455, 1369, 1226, 1205,

932, 919, 727, 704  $\text{cm}^{-1}$ ; HRMS (ESI)  $m/z$ :  $[M+H]^+$  Calcd. for  $\text{C}_{22}\text{H}_{22}\text{NO}$  316.1695; found 316.1699.

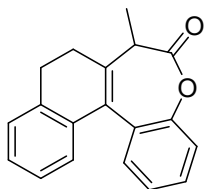

**7-methyl-8,9-dihydrobenzo[b]naphtho[1,2-d]oxepin-6(7H)-one (2w):** A colorless oil, 28 mg, 50% yield. Eluent: PE/EA = 10/1.  $^1\text{H}$  NMR (600 MHz,  $\text{CDCl}_3$ , TMS)  $\delta$  7.48 (dd,  $J = 7.8$ , 1.6 Hz, 1H), 7.44 - 7.39 (m, 1H), 7.29 (dd,  $J = 8.2$ , 1.3 Hz, 1H), 7.26 - 7.17 (m, 3H), 7.17 - 7.11 (m, 1H), 7.04 (dd,  $J = 7.7$ , 1.3 Hz, 1H), 3.23 (qd,  $J = 7.0$ , 2.5 Hz, 1H), 2.93 (td,  $J = 16.9$ , 16.3, 6.3 Hz, 1H), 2.86 (ddd,  $J = 15.2$ , 6.2, 2.0 Hz, 1H), 2.62 (ddd,  $J = 16.3$ , 6.0, 1.8 Hz, 1H), 2.32 (tdd,  $J = 16.7$ , 6.2, 2.6 Hz, 1H), 1.49 (d,  $J = 7.0$  Hz, 3H);  $^{13}\text{C}$  NMR (150 MHz,  $\text{CDCl}_3$ , TMS)  $\delta$  170.9, 150.8, 136.1, 135.1, 133.9, 131.7, 130.4, 129.2, 127.8, 127.5, 127.4, 126.5, 126.4, 124.3, 120.5, 39.6, 28.0, 23.1, 12.9; IR (EtOH)  $\nu$  3055, 2935, 2836, 1761, 1602, 1481, 1441, 1247, 1211, 1135, 1085, 1030, 906, 769, 729, 703  $\text{cm}^{-1}$ ; HRMS (ESI)  $m/z$ :  $[M+H]^+$  Calcd. for  $\text{C}_{19}\text{H}_{17}\text{O}_2$  277.1223; found 277.1226.

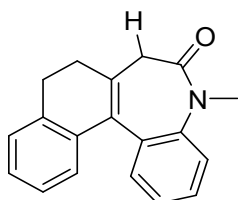

**5-methyl-5,7,8,9-tetrahydro-6H-benzo[b]naphtho[1,2-d]azepin-6-one (2x):** A white solid, 35 mg, 63% yield, m.p.: 145-147  $^{\circ}\text{C}$ . Eluent: PE/EA = 10/1.  $^1\text{H}$  NMR (400 MHz,  $\text{CDCl}_3$ , TMS)  $\delta$  7.47 (dd,  $J = 7.7$ , 1.6 Hz, 1H), 7.41 - 7.31 (m, 2H), 7.22 - 7.09 (m, 4H), 7.03 (d,  $J = 7.4$  Hz, 1H), 3.36 (s, 3H), 3.06 (s, 2H), 2.99 (dd,  $J = 15.6$ , 6.9 Hz, 1H), 2.86 - 2.69 (m, 2H), 2.50 - 2.42 (m, 1H);  $^{13}\text{C}$  NMR (150 MHz,  $\text{CDCl}_3$ , TMS)  $\delta$  171.2, 143.0, 136.2, 136.0, 134.6, 131.7, 130.9, 130.1, 128.0, 127.7, 126.8, 126.3, 126.0, 124.0, 122.4, 42.6, 35.8, 30.7, 28.3; IR (EtOH)  $\nu$  3055, 2922, 2825, 1662, 1598, 1481, 1445, 1356, 1263, 1117, 1090, 908, 765, 747, 727, 661  $\text{cm}^{-1}$ ; HRMS (ESI)  $m/z$ :  $[M+H]^+$  Calcd. for  $\text{C}_{19}\text{H}_{18}\text{NO}$  276.1382; found 276.1384.

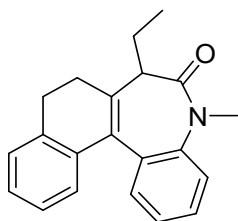

**7-ethyl-5-methyl-5,7,8,9-tetrahydro-6H-benzo[b]naphtho[1,2-d]azepin-6-one (2y):** A white solid, 35 mg, 57% yield, m.p.:180-182 °C. Eluent: PE/EA = 10/1. Containing trace amount of three-membered ring unopened by-product. <sup>1</sup>H NMR (400 MHz, CDCl<sub>3</sub>, TMS) δ 7.48 (dd, *J* = 7.8, 1.6 Hz, 1H), 7.41 - 7.35 (m, 2H), 7.22 - 7.17 (m, 2H), 7.17 - 7.07 (m, 2H), 6.95 (dd, *J* = 7.5, 1.5 Hz, 1H), 3.36 (s, 3H), 2.92 (td, *J* = 16.5, 16.0 Hz, 1H), 2.82 (dd, *J* = 14.1, 7.2 Hz, 1H), 2.71 (td, *J* = 8.7, 6.6 Hz, 1H), 2.56 (dd, *J* = 16.5, 6.1 Hz, 1H), 2.25 (tdd, *J* = 16.8, 6.1, 2.4 Hz, 1H), 2.13 - 2.02 (m, 1H), 1.88 - 1.78 (m, 1H), 0.93 (t, *J* = 7.3 Hz, 3H); <sup>13</sup>C NMR (150 MHz, CDCl<sub>3</sub>, TMS) δ 171.5, 142.9, 139.5, 136.1, 134.9, 131.7, 131.3, 130.2, 128.0, 127.4, 126.7, 126.4, 126.2, 123.9, 122.2, 47.9, 35.5, 28.2, 23.6, 20.3, 12.5; IR (EtOH) ν 2970, 2878, 1647, 1597, 1482, 1446, 1378, 1342, 1086, 1048, 879, 765, 664 cm<sup>-1</sup>; HRMS (ESI) *m/z*: [M+H]<sup>+</sup> Calcd. for C<sub>21</sub>H<sub>22</sub>NO 304.1695; found 304.1699.

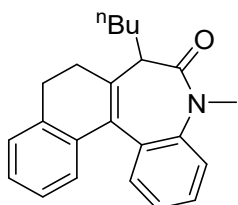

**7-butyl-5-methyl-5,7,8,9-tetrahydro-6H-benzo[b]naphtho[1,2-d]azepin-6-one (2z):** A yellow oil, 37 mg, 55% yield. Eluent: PE/EA = 10/1. Containing trace amount of three-membered ring unopened by-product. <sup>1</sup>H NMR (400 MHz, CDCl<sub>3</sub>, TMS) δ 7.50 - 7.33 (m, 3H), 7.23 - 7.05 (m, 4H), 6.95 (d, *J* = 7.6 Hz, 1H), 3.36 (d, *J* = 1.9 Hz, 3H), 2.99 - 2.73 (m, 3H), 2.57 (dd, *J* = 15.6, 5.2 Hz, 1H), 2.26 (tdd, *J* = 16.7, 6.2, 2.3 Hz, 1H), 2.13 - 1.99 (m, 1H), 1.85 - 1.72 (m, 1H), 1.34 (dd, *J* = 7.4, 3.3 Hz, 2H), 1.24 - 1.10 (m, 2H), 0.90 (t, *J* = 7.0 Hz, 3H); <sup>13</sup>C NMR (150 MHz, CDCl<sub>3</sub>, TMS) δ 171.6, 142.9, 139.6, 136.1, 134.9, 131.6, 131.2, 130.2, 128.0, 127.4, 126.7, 126.4, 126.2, 123.9, 122.2, 46.3, 35.5, 30.3, 28.2, 27.0, 23.7, 23.0,

14.1; IR (neat)  $\nu$  2957, 2920, 2870, 2850, 1663, 1597, 1482, 1445, 1364, 908, 765, 727, 664  $\text{cm}^{-1}$ ; HRMS (ESI)  $m/z$ :  $[M+H]^+$  Calcd. for  $\text{C}_{23}\text{H}_{26}\text{NO}$  332.2008; found 332.2014.

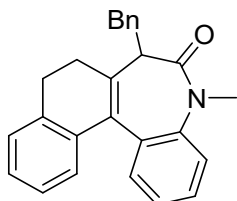

**7-benzyl-5-methyl-5,7,8,9-tetrahydro-6H-benzo[b]naphtho[1,2-d]azepin-6-one (2aa):** A light green oil, 30 mg, 41% yield. Eluent: PE/EA = 10/1.  $^1\text{H}$  NMR (400 MHz,  $\text{CDCl}_3$ , TMS)  $\delta$  7.51 (d,  $J = 7.8$  Hz, 1H), 7.42 - 7.31 (m, 2H), 7.24 - 7.07 (m, 9H), 6.96 (d,  $J = 7.4$  Hz, 1H), 3.42 (dd,  $J = 12.4, 5.4$  Hz, 1H), 3.35 (s, 3H), 3.31 - 3.19 (m, 2H), 2.87 - 2.69 (m, 2H), 2.58 (ddd,  $J = 16.4, 5.8, 2.4$  Hz, 1H), 2.33 (tdd,  $J = 14.2, 7.4, 6.6$  Hz, 1H);  $^{13}\text{C}$  NMR (150 MHz,  $\text{CDCl}_3$ , TMS)  $\delta$  170.9, 142.8, 139.8, 139.0, 136.1, 134.8, 131.5, 130.2, 128.7, 128.3, 128.2, 127.5, 126.9, 126.4, 126.2, 126.0, 124.0, 122.4, 46.4, 35.7, 32.6, 28.1, 23.9; IR (neat)  $\nu$  3015, 2954, 2934, 1659, 1596, 1492, 1452, 1369, 1344, 1088, 917, 768, 747, 722, 700, 665  $\text{cm}^{-1}$ ; HRMS (ESI)  $m/z$ :  $[M+H]^+$  Calcd. for  $\text{C}_{26}\text{H}_{24}\text{NO}$  366.1852; found 366.1854.

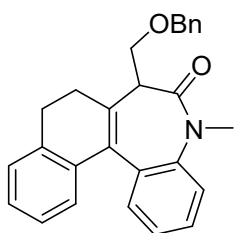

**7-((benzyloxy)methyl)-5-methyl-5,7,8,9-tetrahydro-6H-benzo[b]naphtho[1,2-d]azepin-6-one (2ab):** A light green oil, 24 mg, 30% yield. Eluent: PE/EA = 10/1.  $^1\text{H}$  NMR (600 MHz,  $\text{CDCl}_3$ , TMS)  $\delta$  7.44 (dd,  $J = 7.8, 1.5$  Hz, 1H), 7.40 - 7.36 (m, 1H), 7.35 - 7.30 (m, 5H), 7.29 - 7.27 (m, 1H), 7.22 - 7.16 (m, 2H), 7.16 - 7.12 (m, 1H), 7.12 - 7.07 (m, 1H), 6.94 (dd,  $J = 7.7, 1.3$  Hz, 1H), 4.60 (d,  $J = 11.9$  Hz, 1H), 4.57 (d,  $J = 12.0$  Hz, 1H), 4.06 - 3.99 (m, 2H), 3.20 (ddd,  $J = 8.7, 6.4, 2.3$  Hz, 1H), 2.98 (td,  $J = 16.2, 15.8, 6.3$  Hz, 1H), 2.79 (ddd,  $J = 15.1, 5.9, 1.9$  Hz, 1H), 2.52 (ddd,  $J = 16.2, 6.3, 1.9$  Hz, 1H), 2.31 (tdd,  $J = 16.7, 5.9, 2.4$  Hz, 1H);  $^{13}\text{C}$  NMR (150 MHz,  $\text{CDCl}_3$ , TMS)  $\delta$  170.3, 142.5, 138.0, 137.6, 136.1, 134.8, 131.8, 131.5,

130.4, 128.4, 128.1, 128.0, 127.8, 127.5, 126.9, 126.4, 126.2, 124.1, 122.3, 73.7, 67.2, 46.3, 35.4, 28.1, 23.8; IR (neat)  $\nu$  2914, 2870, 1659, 1482, 1446, 1367, 1086, 908, 769, 729, 697, 663  $\text{cm}^{-1}$ ; HRMS (ESI)  $m/z$ :  $[\text{M}+\text{H}]^+$  Calcd. for  $\text{C}_{27}\text{H}_{26}\text{NO}_2$  396.1964; found 396.1965.

## 10. Spectroscopic Data of Substrates (NMR Spectrum)

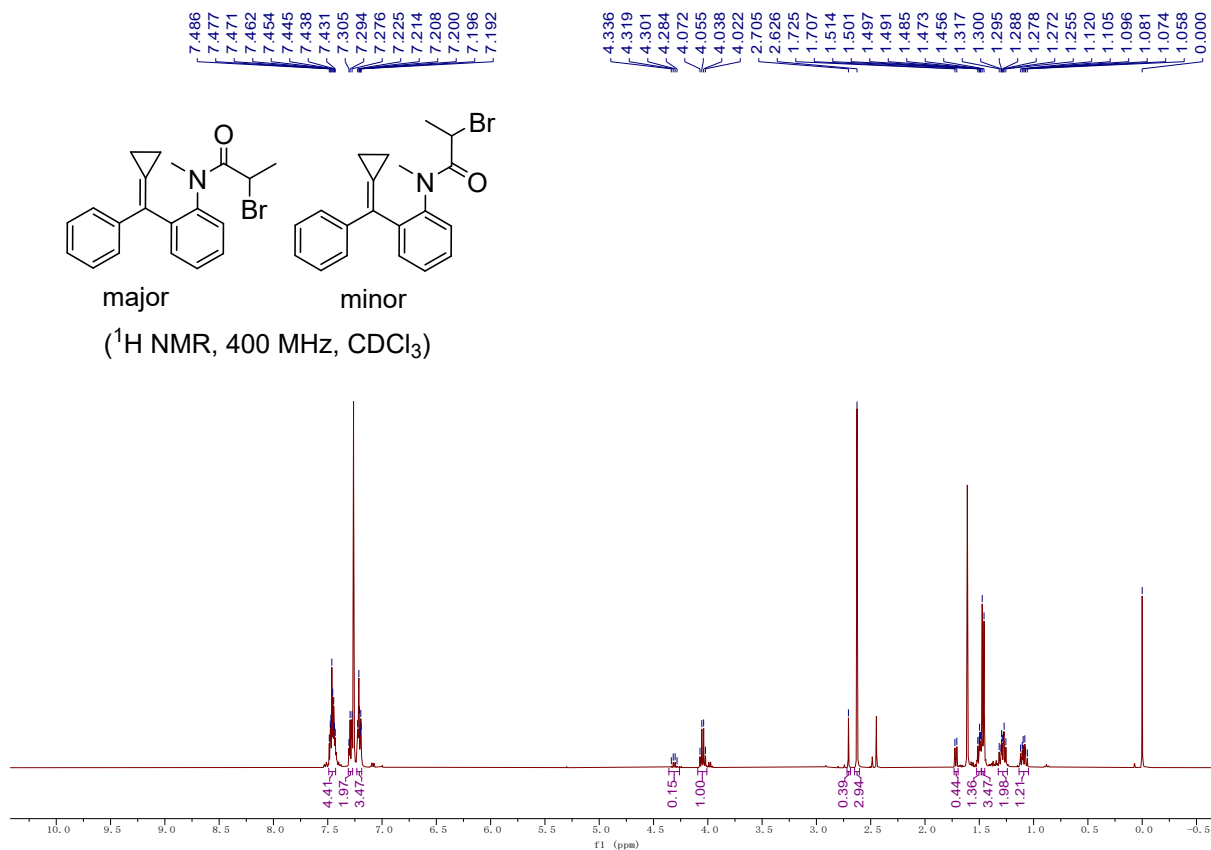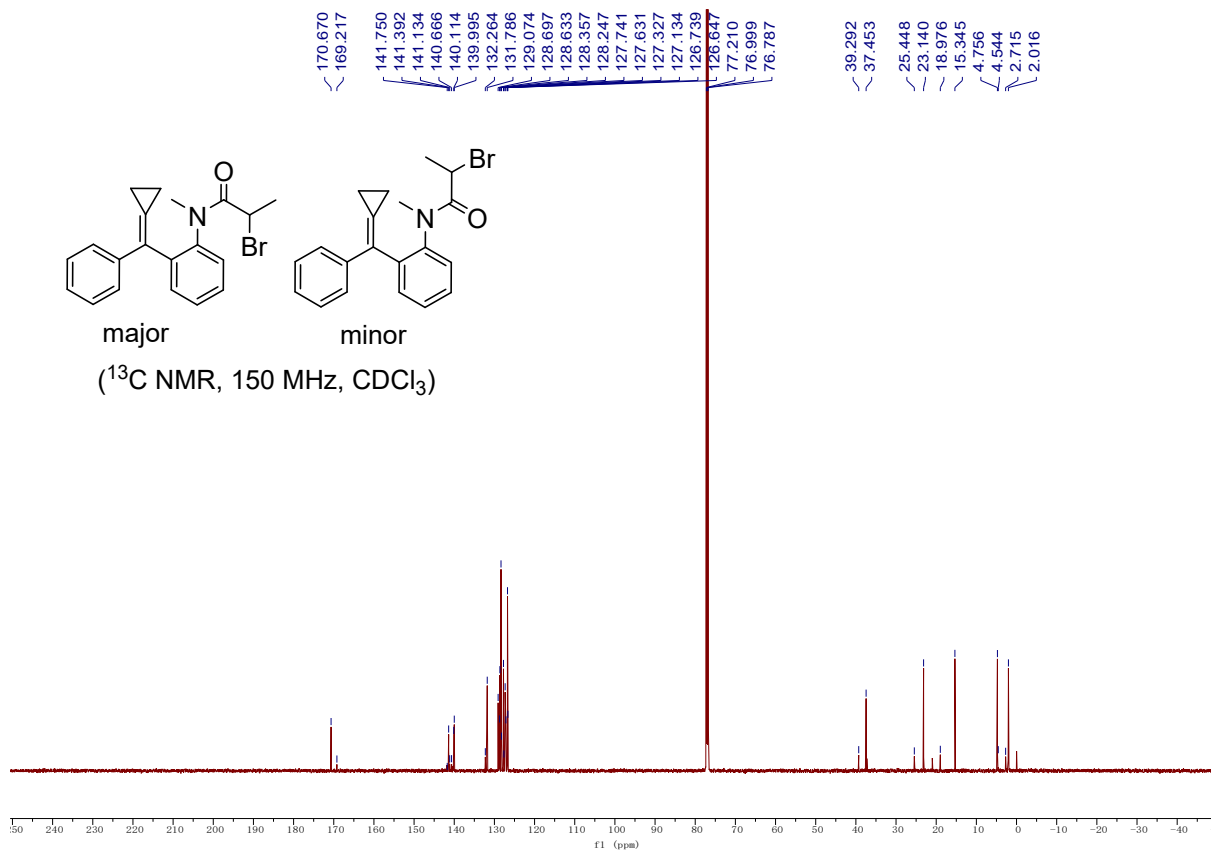

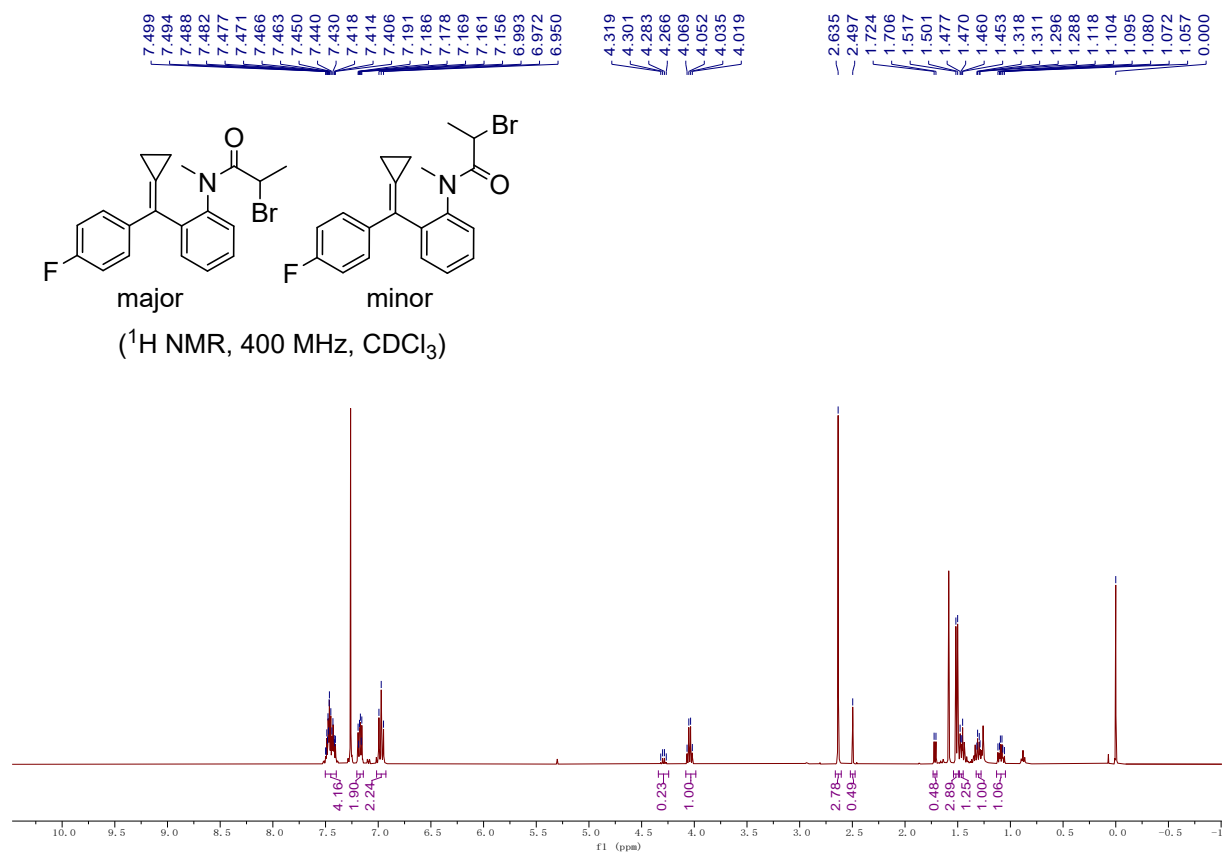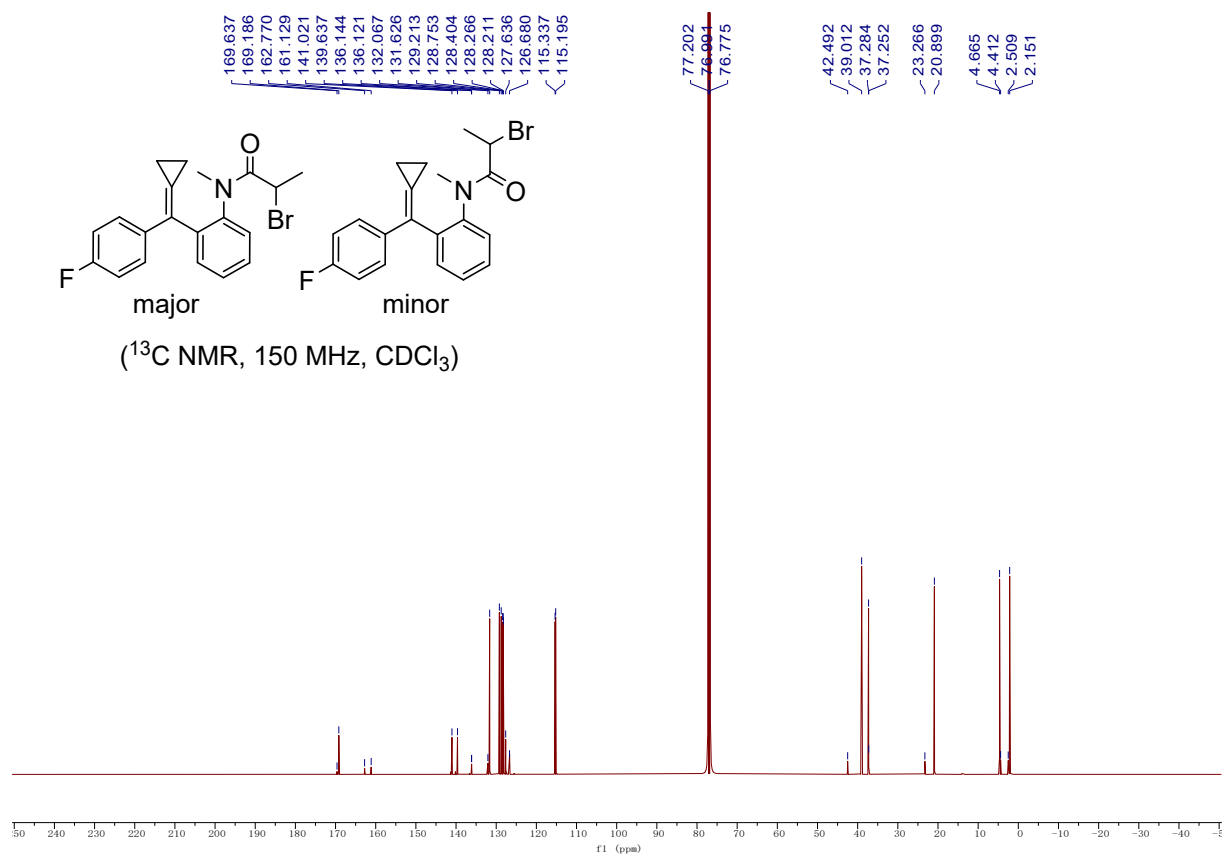



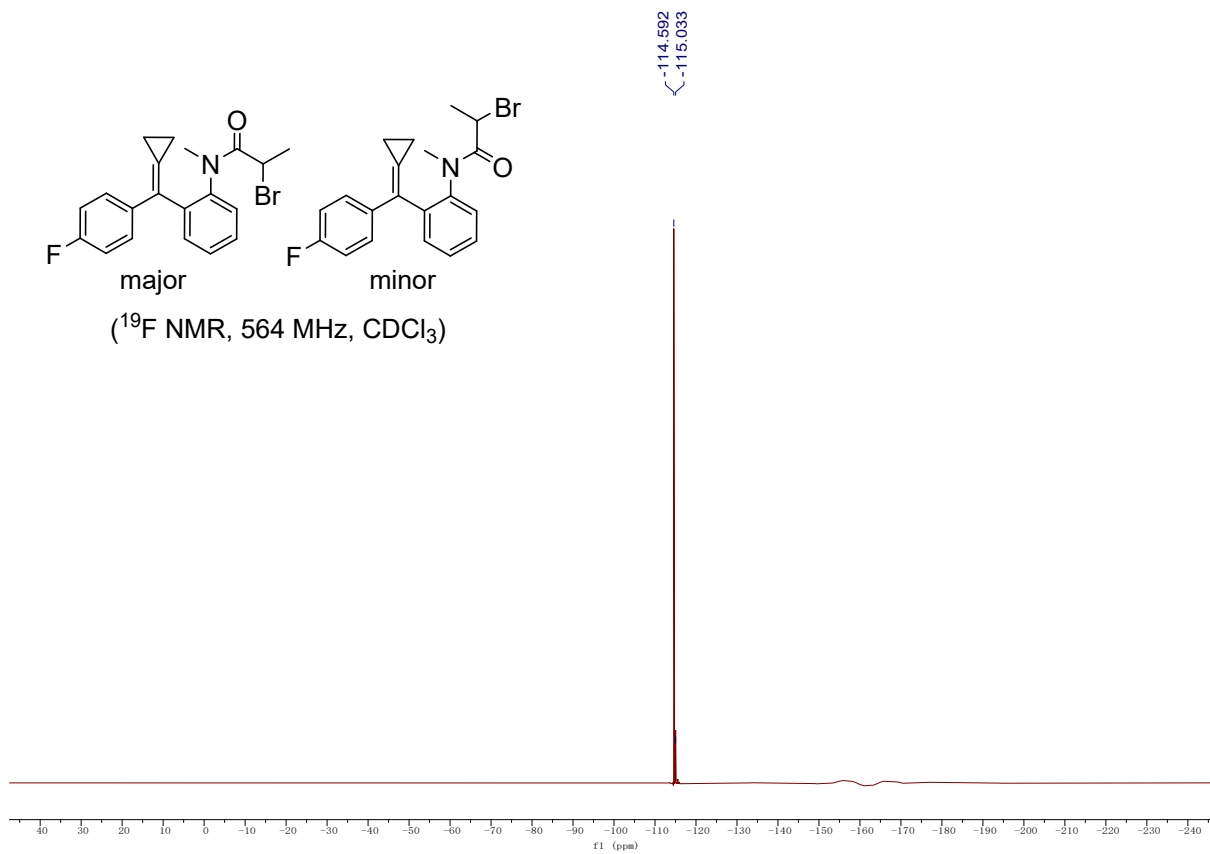

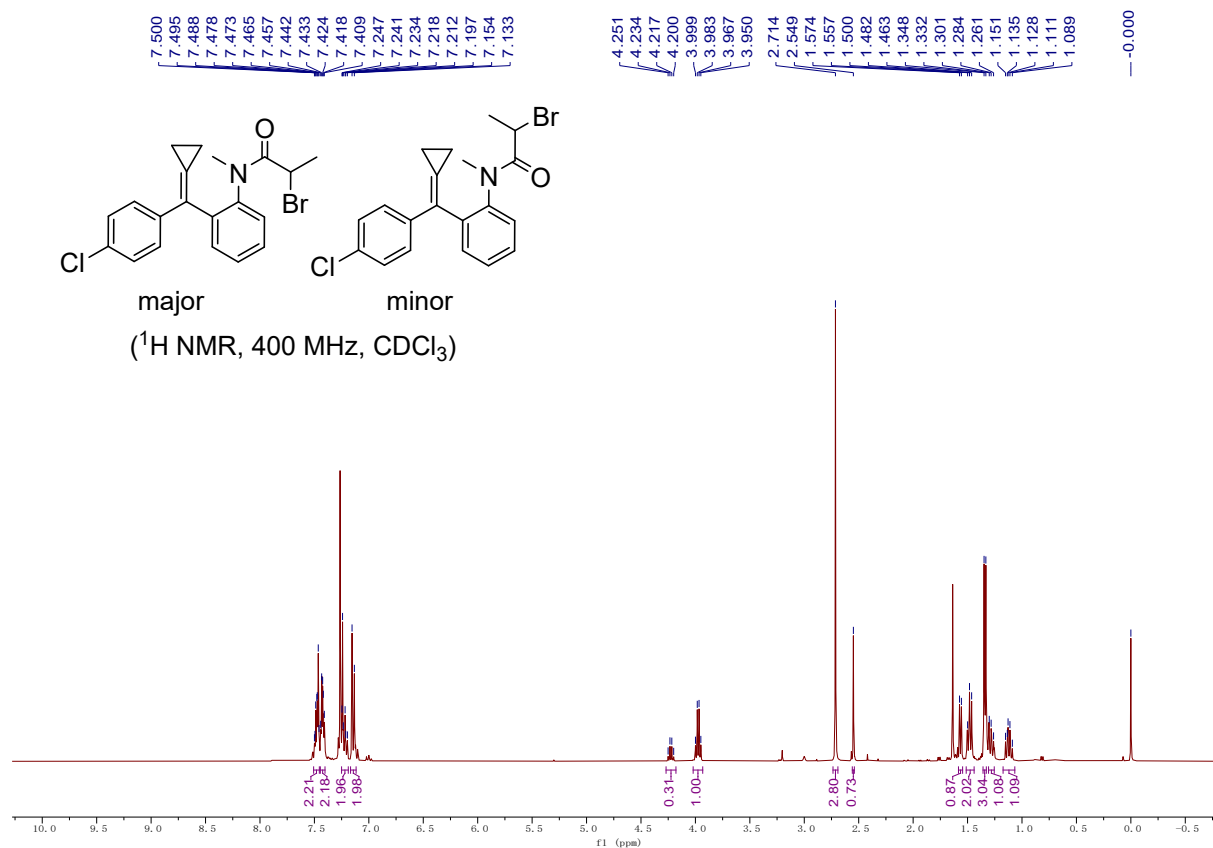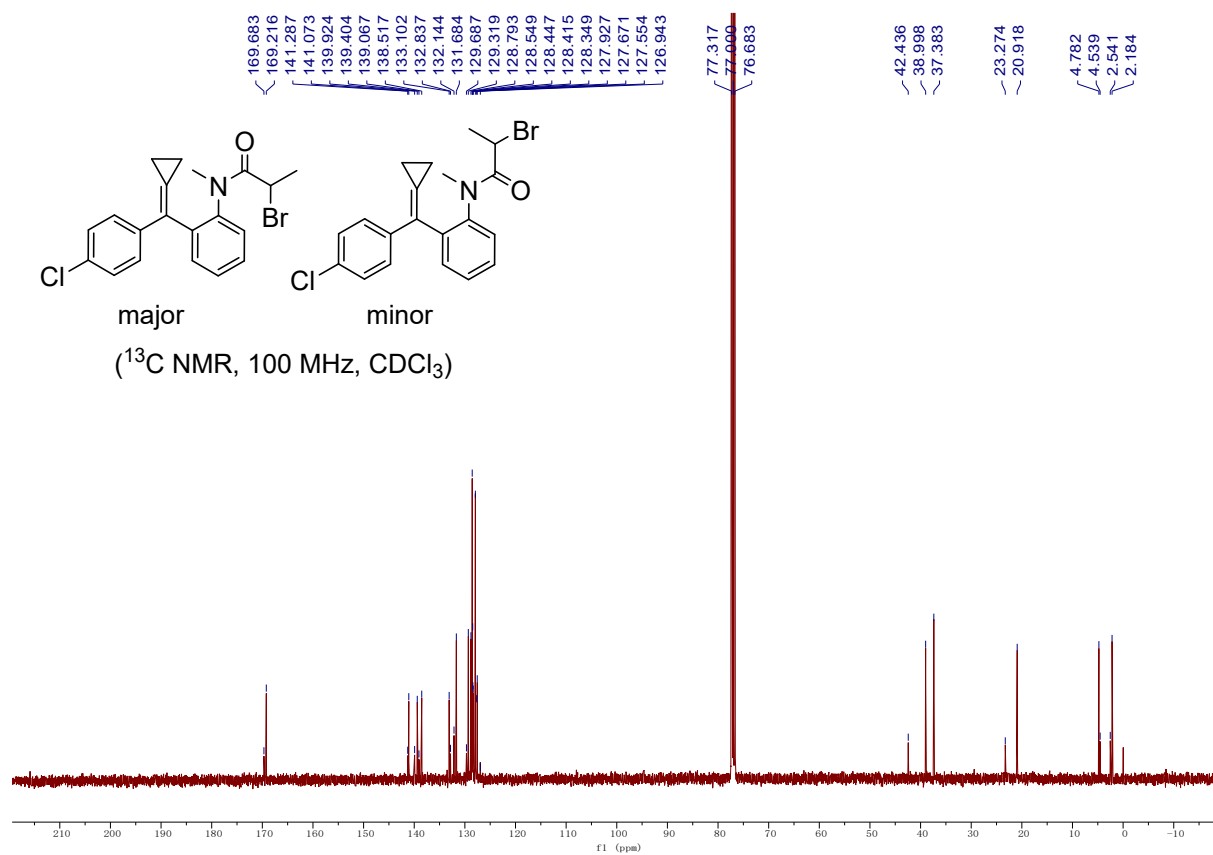

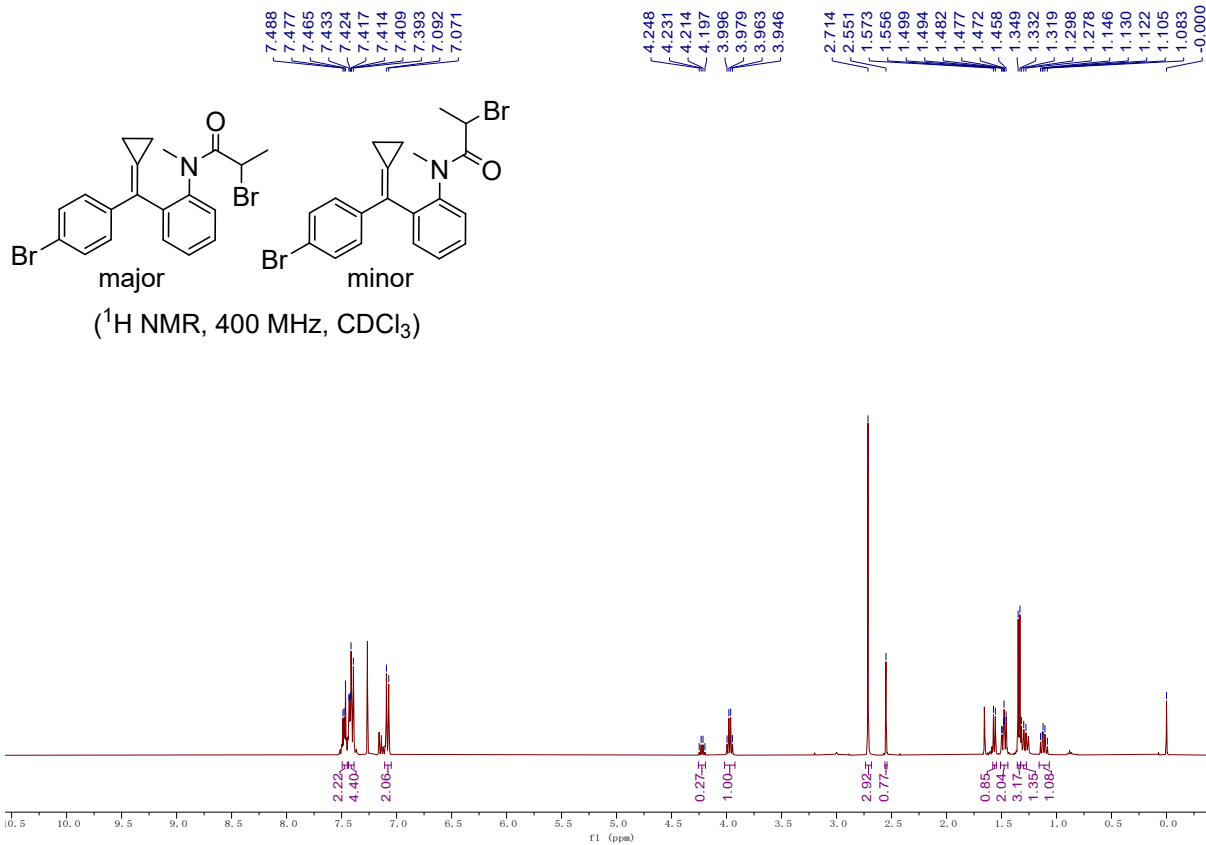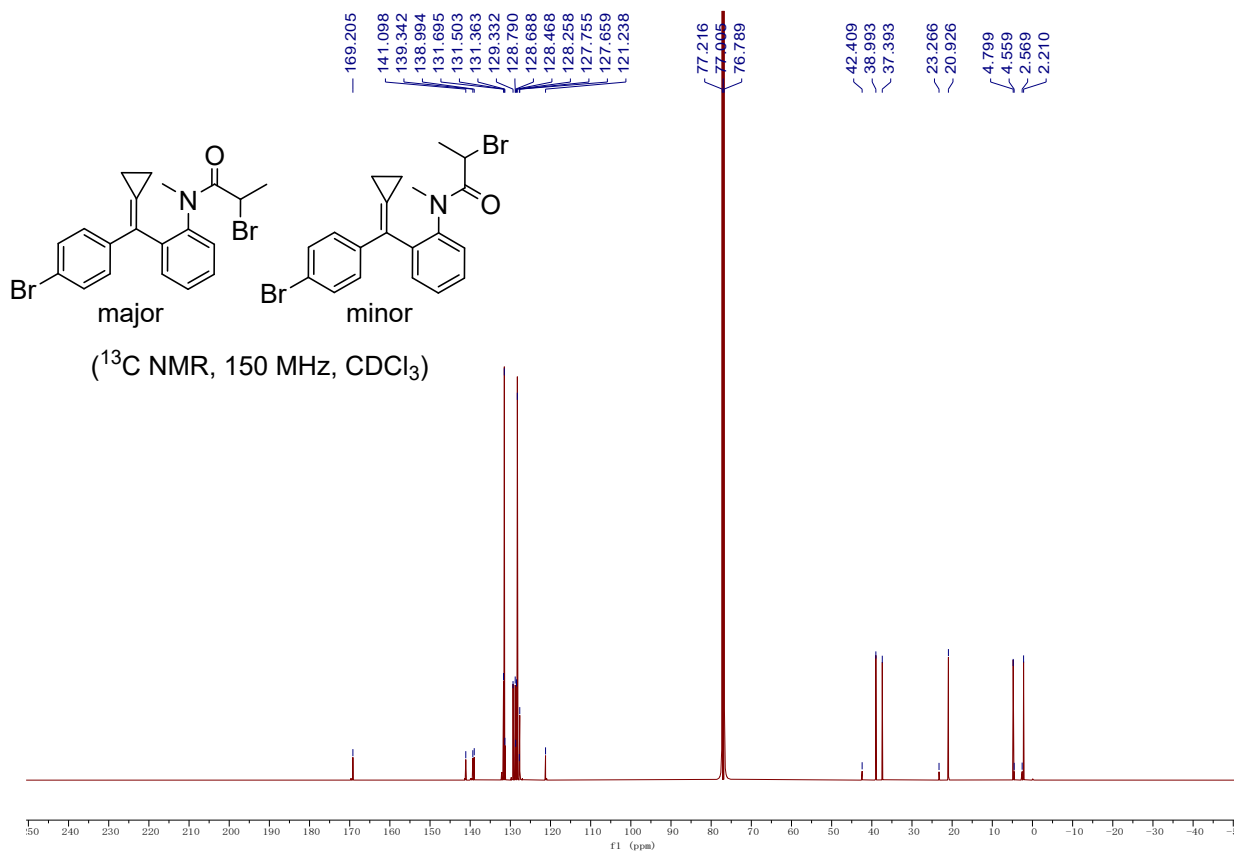

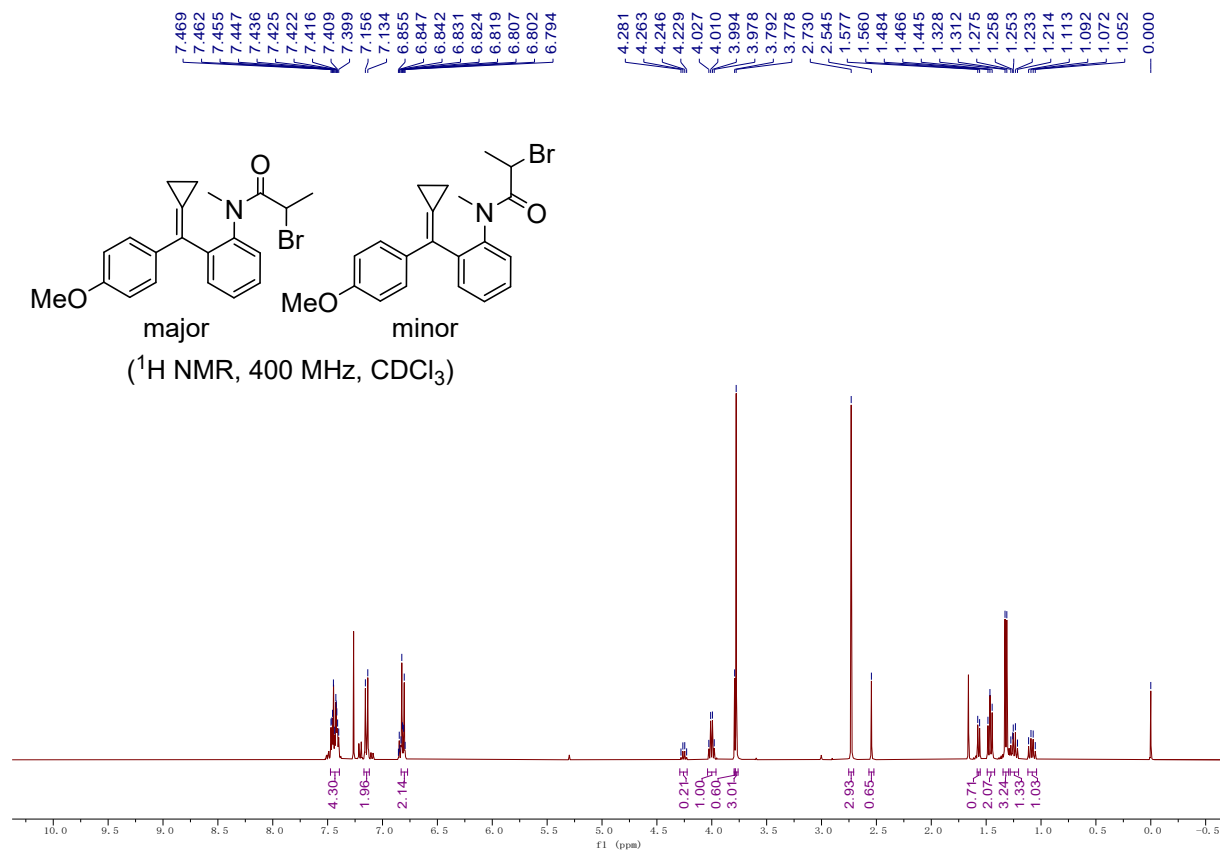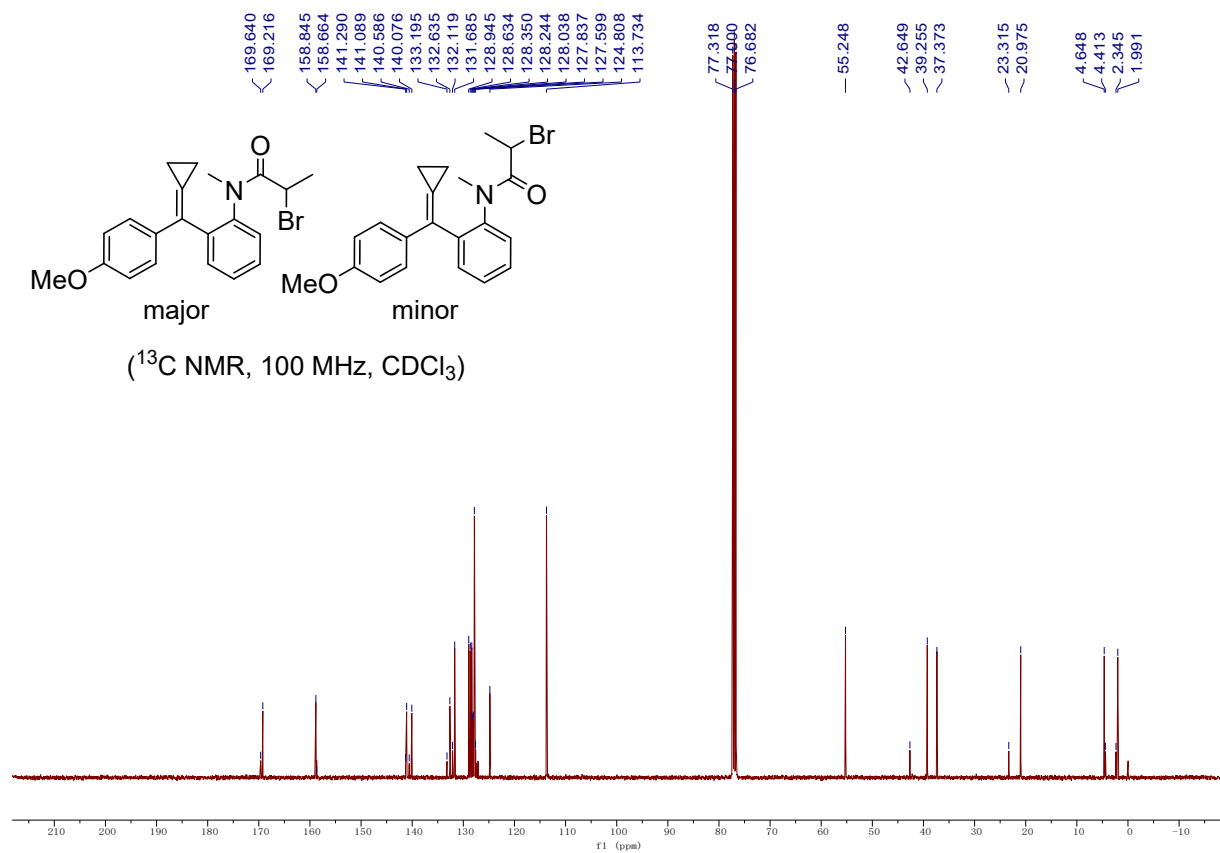

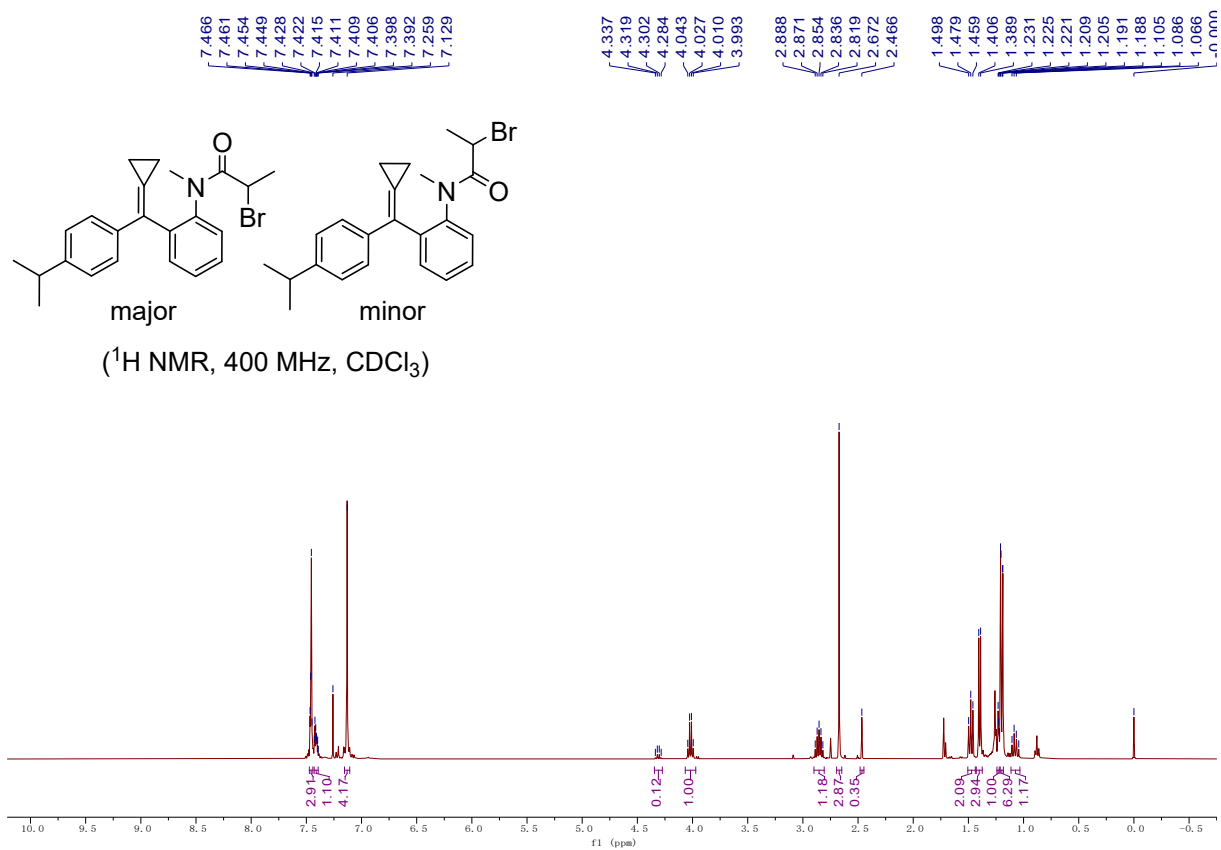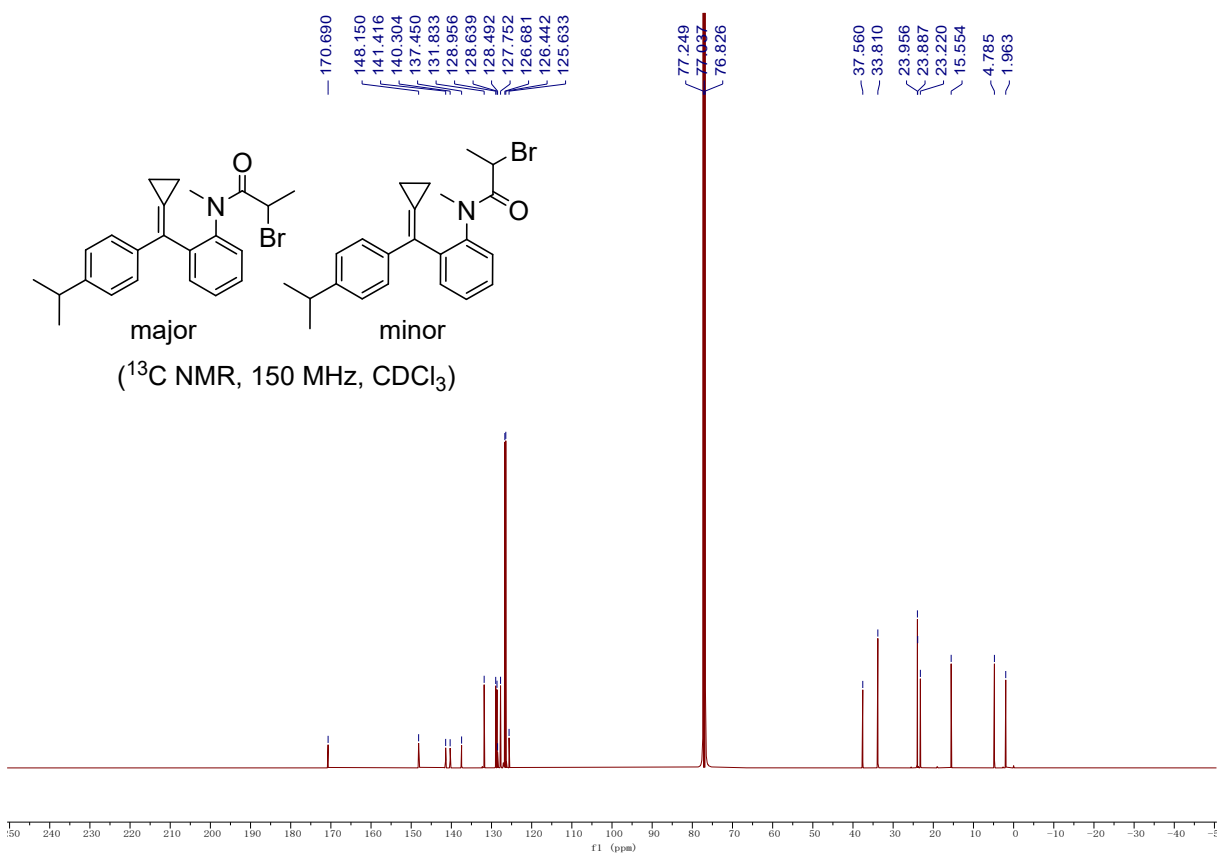

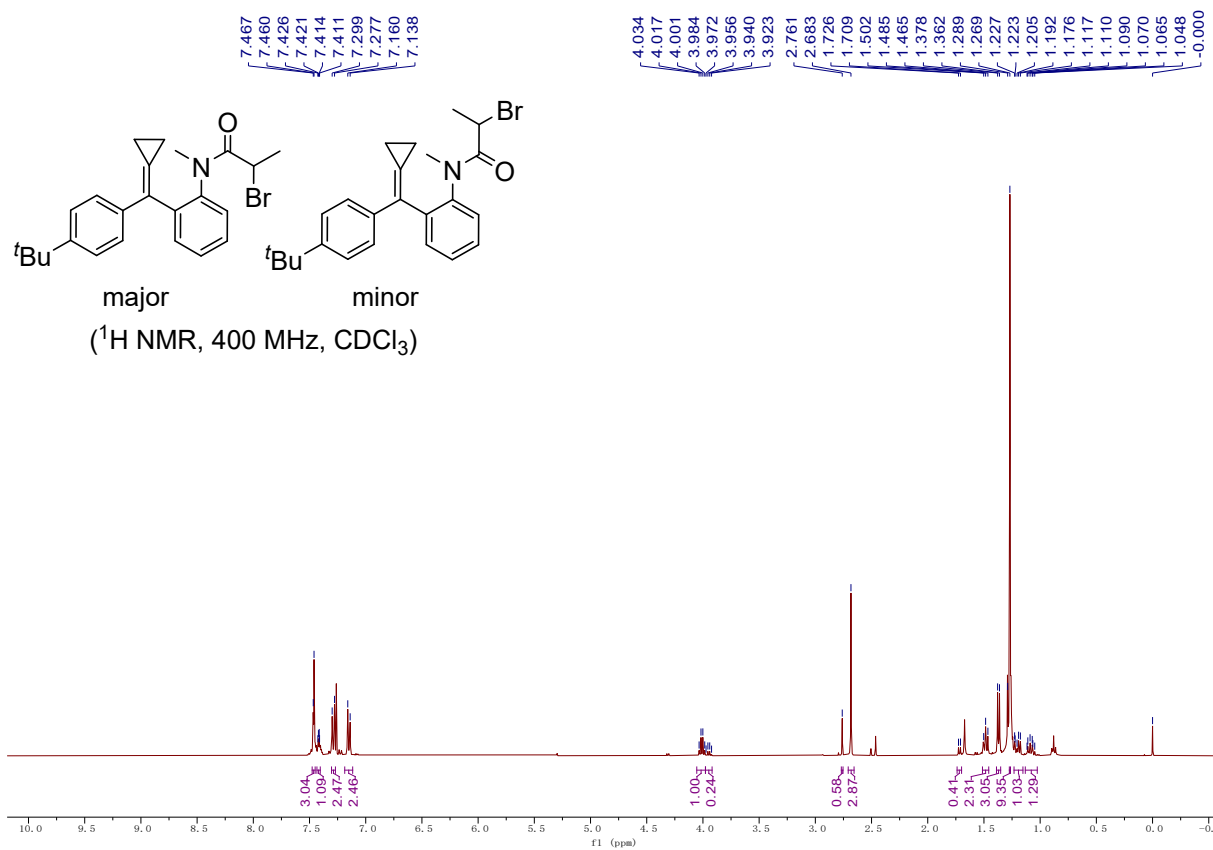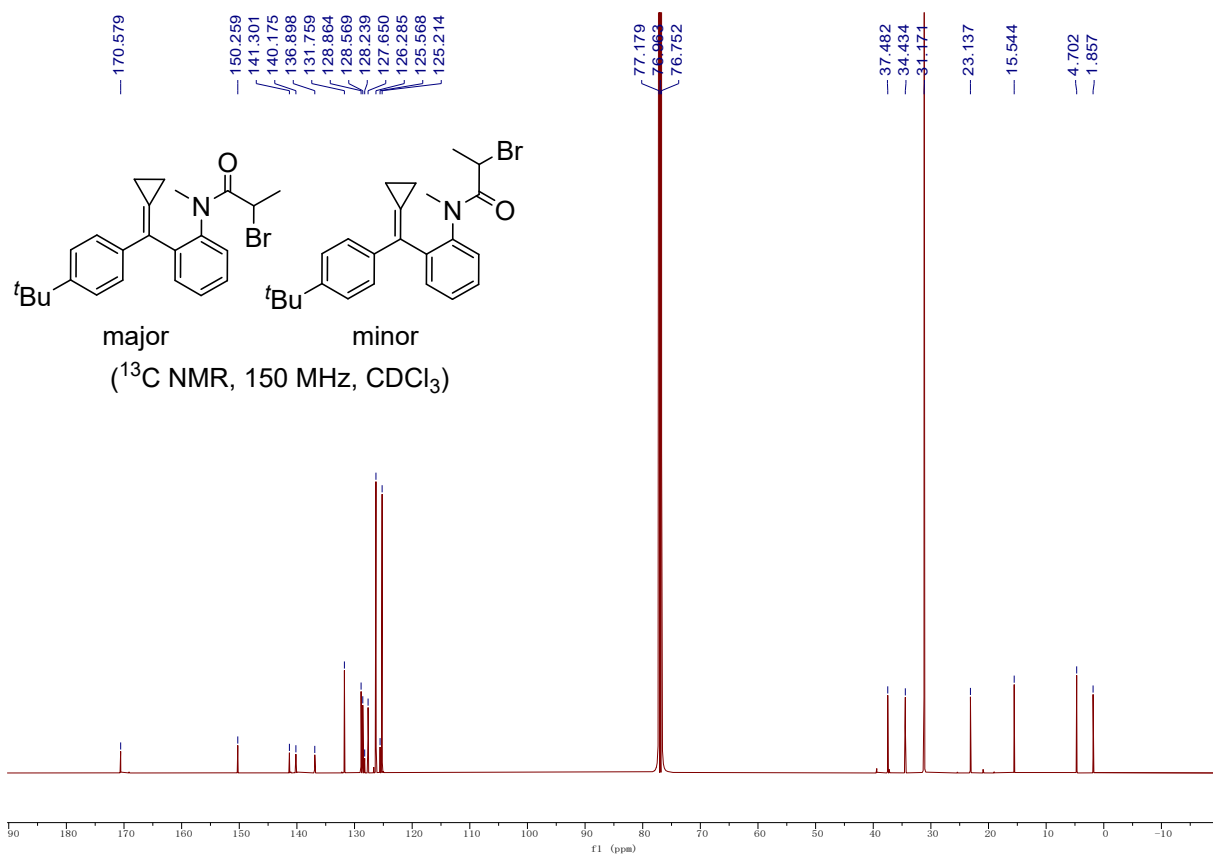

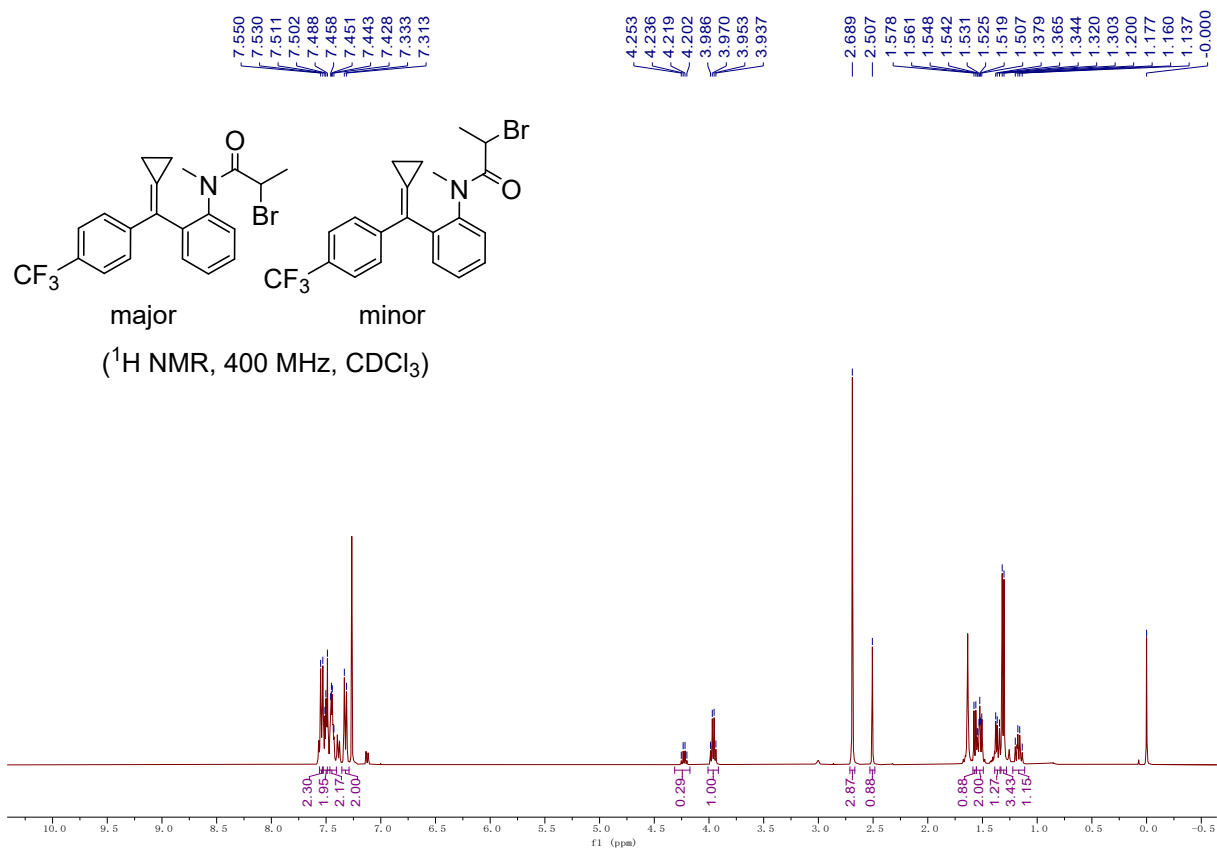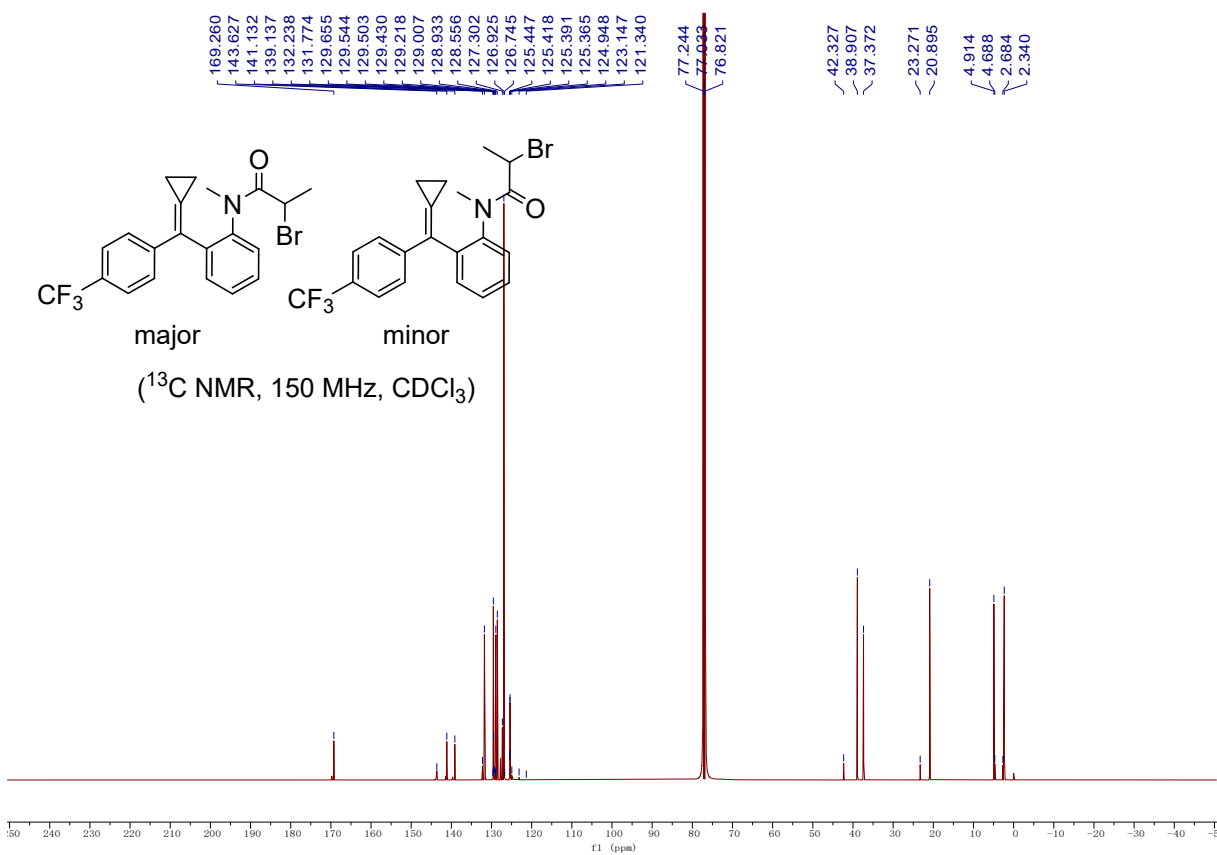

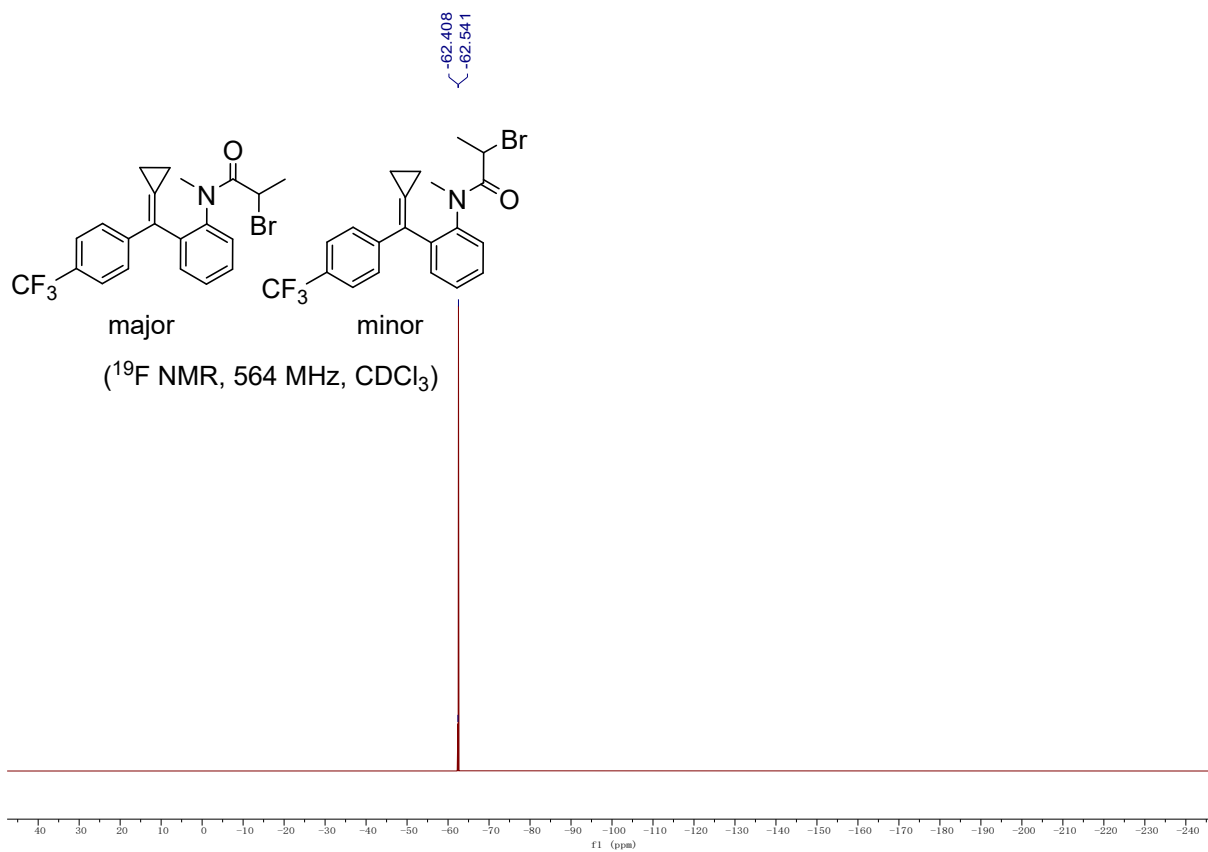



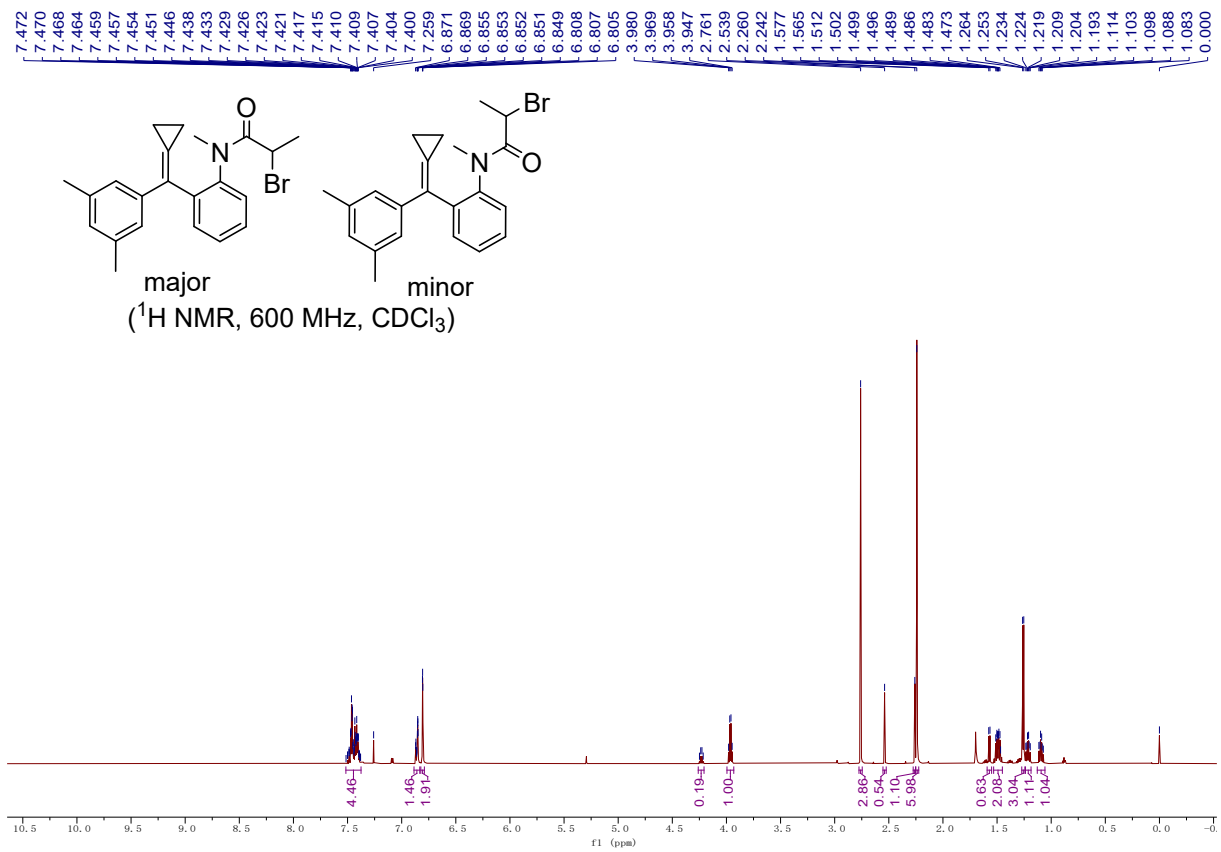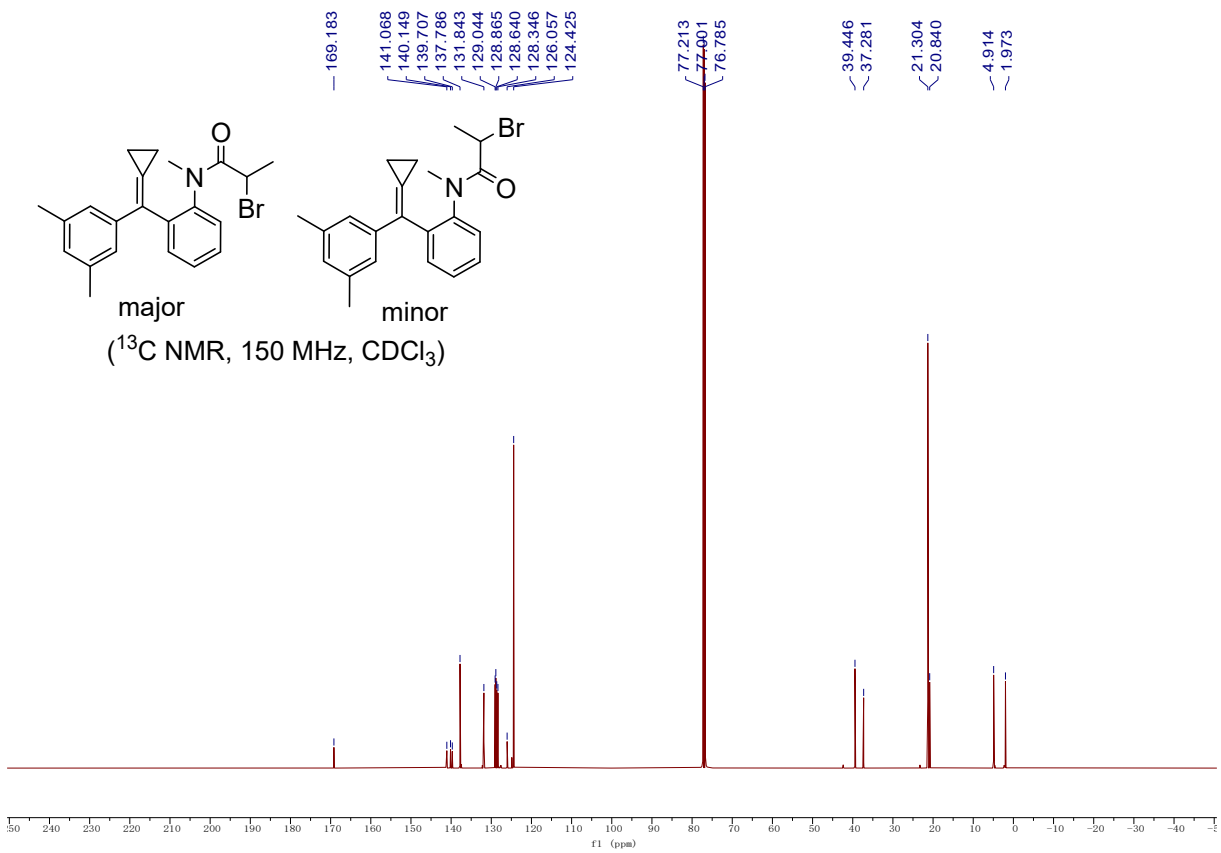

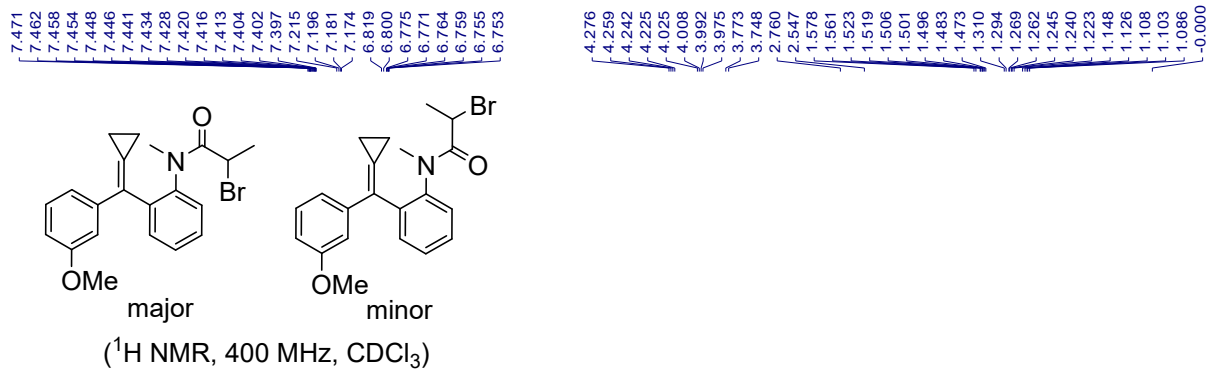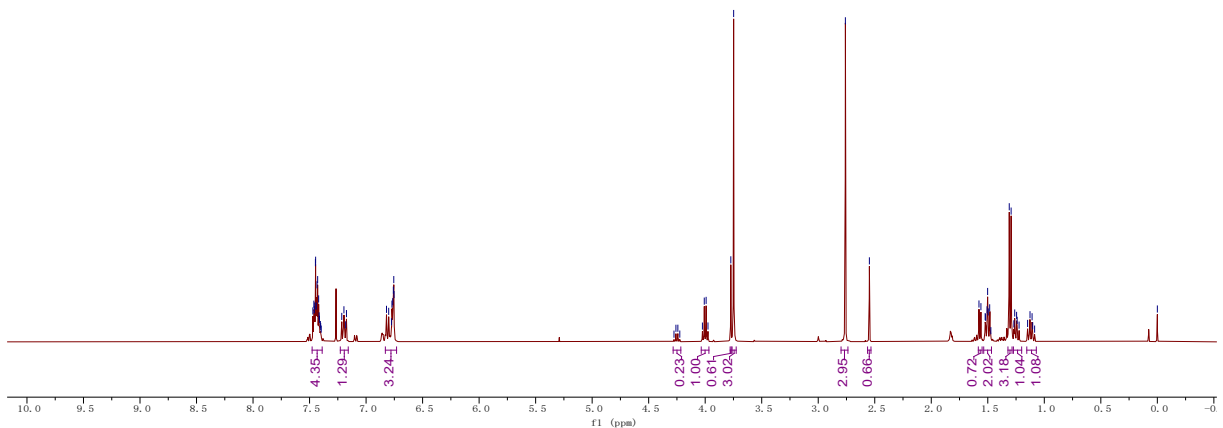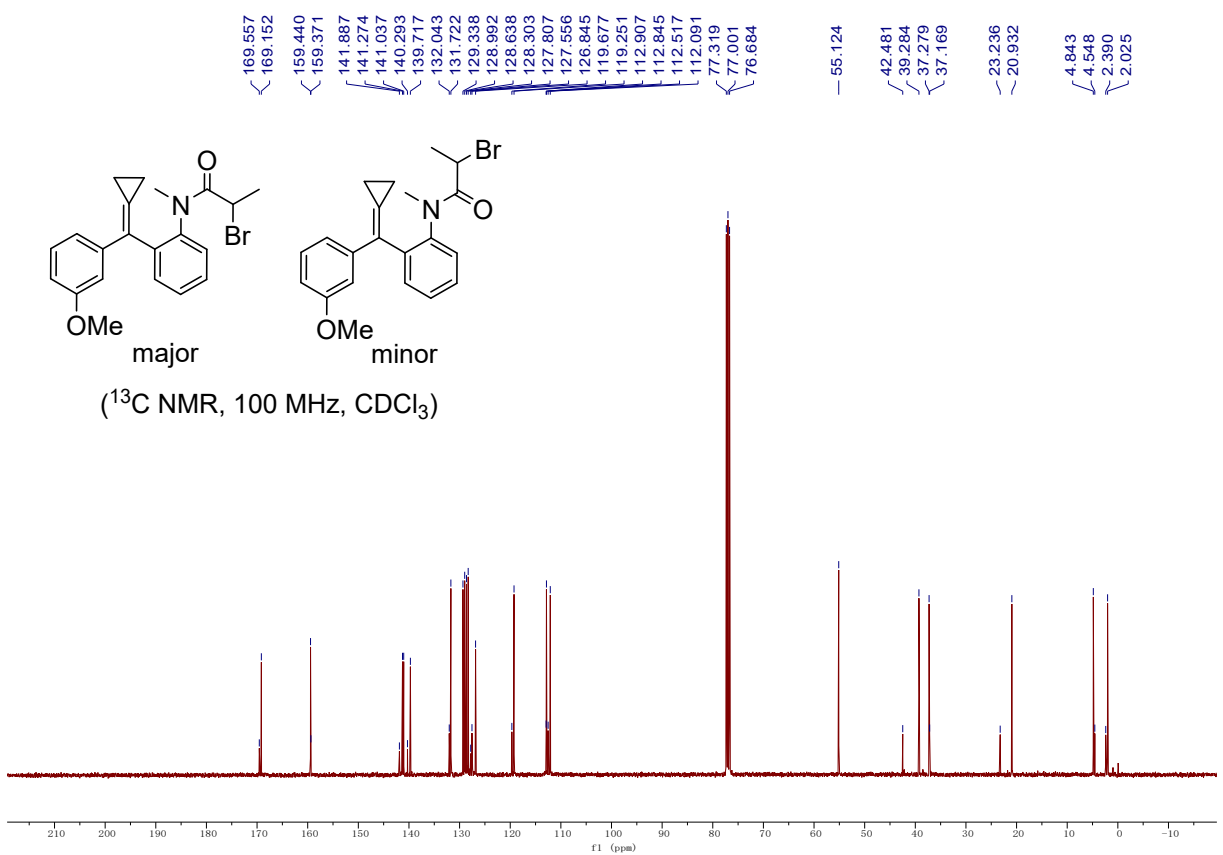

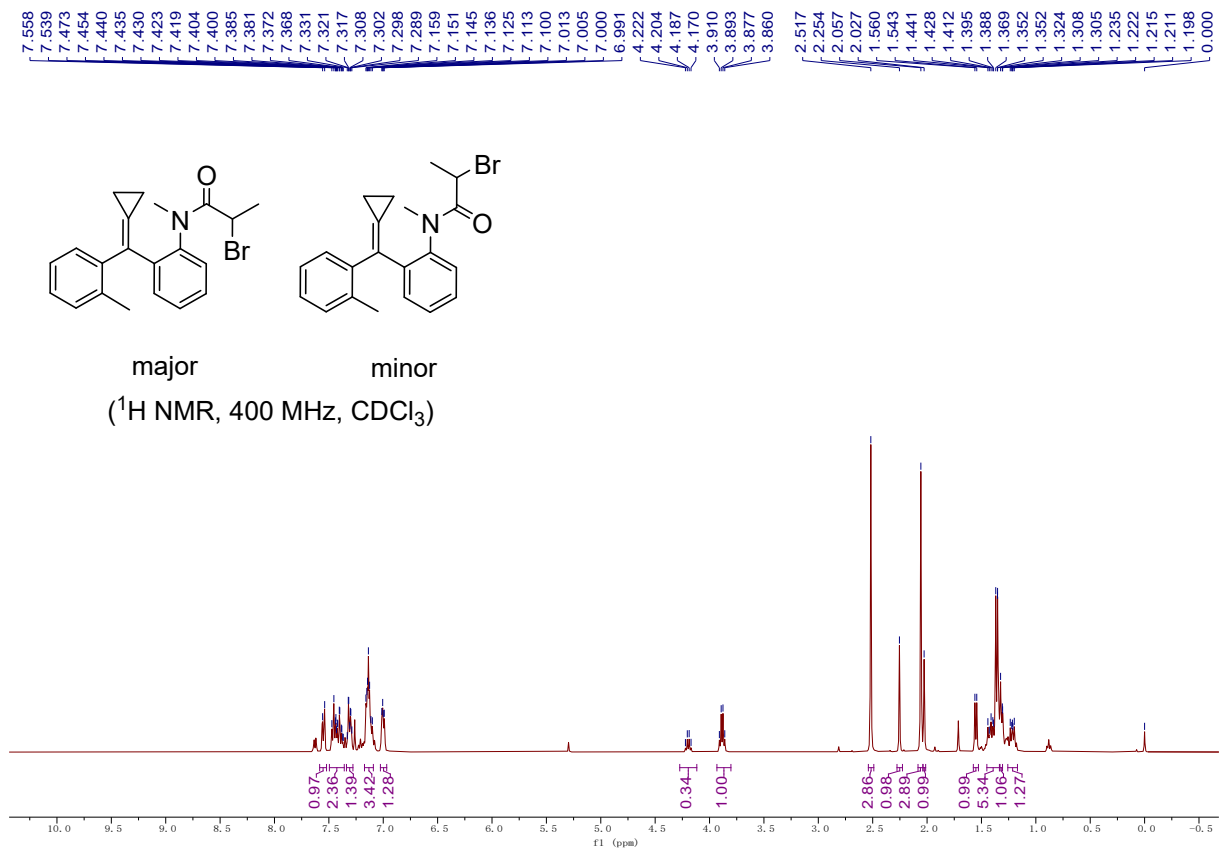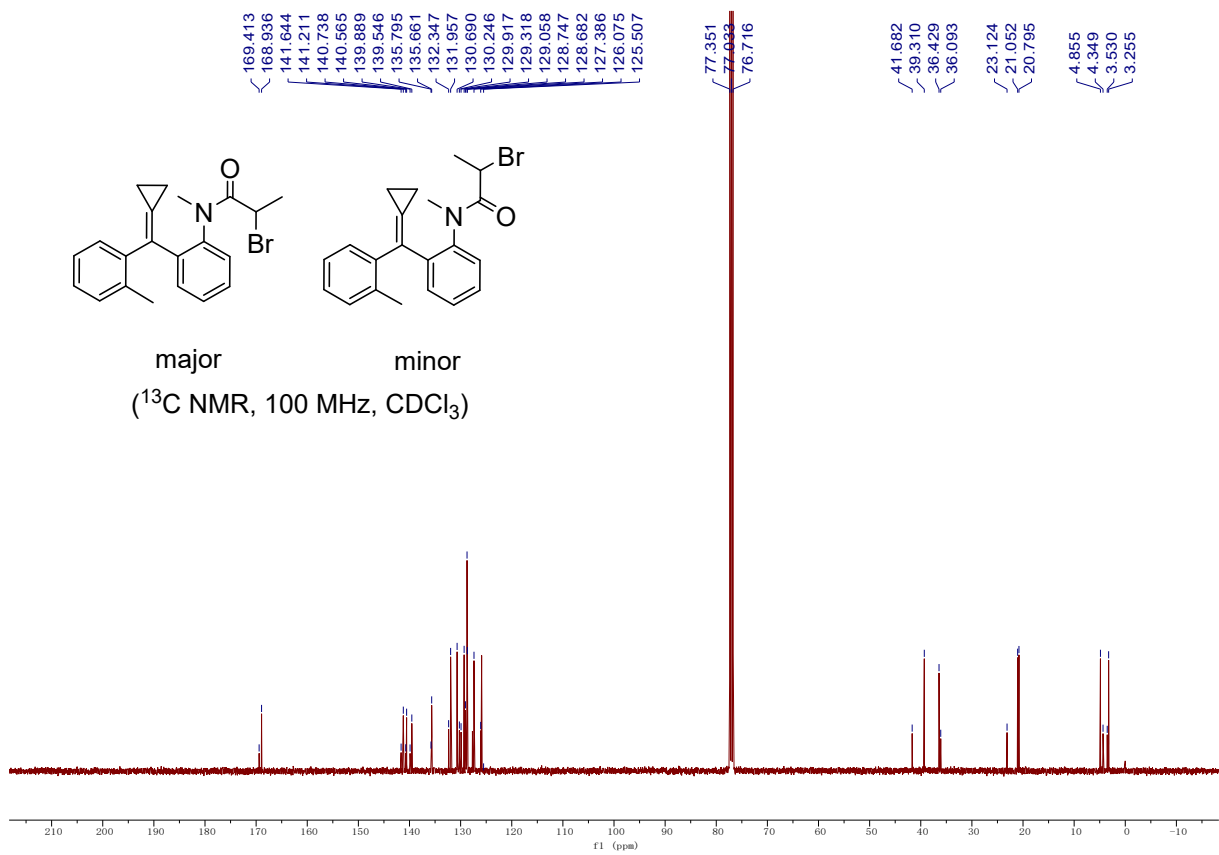

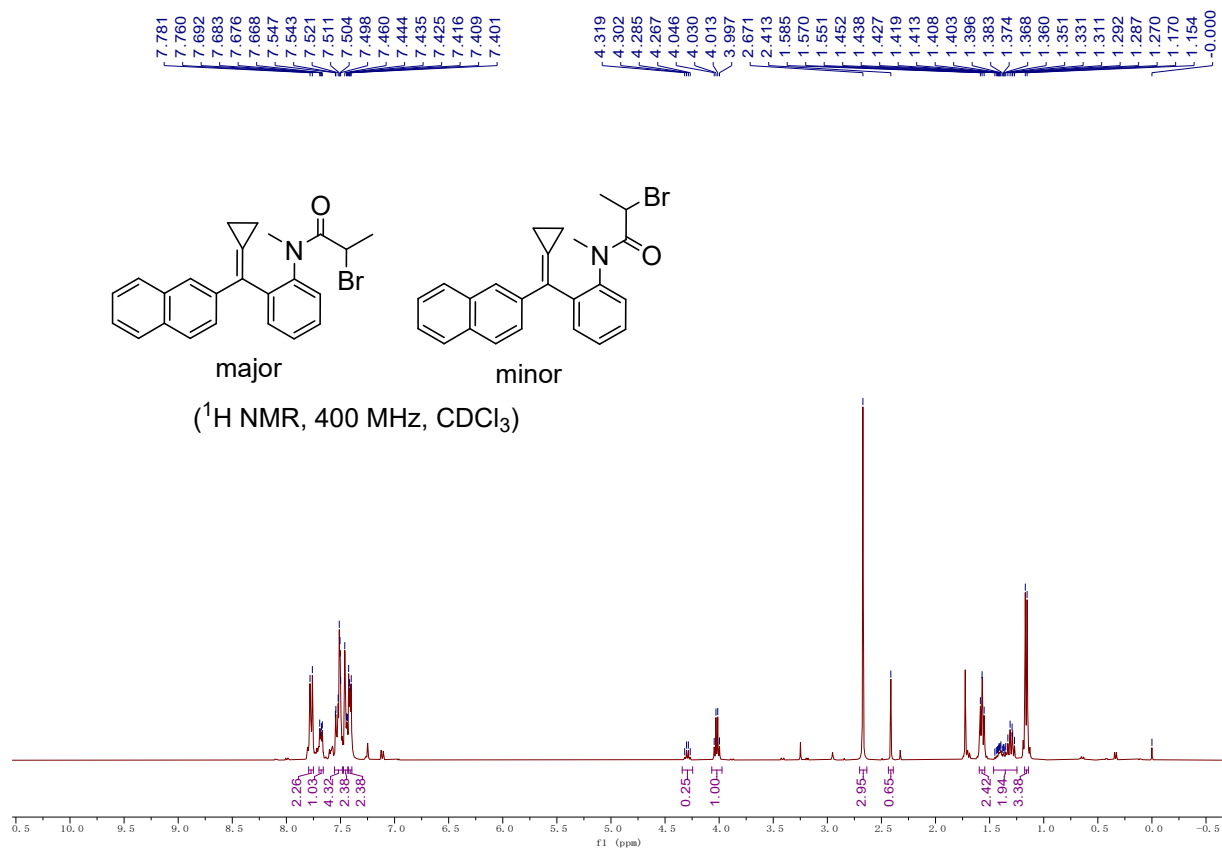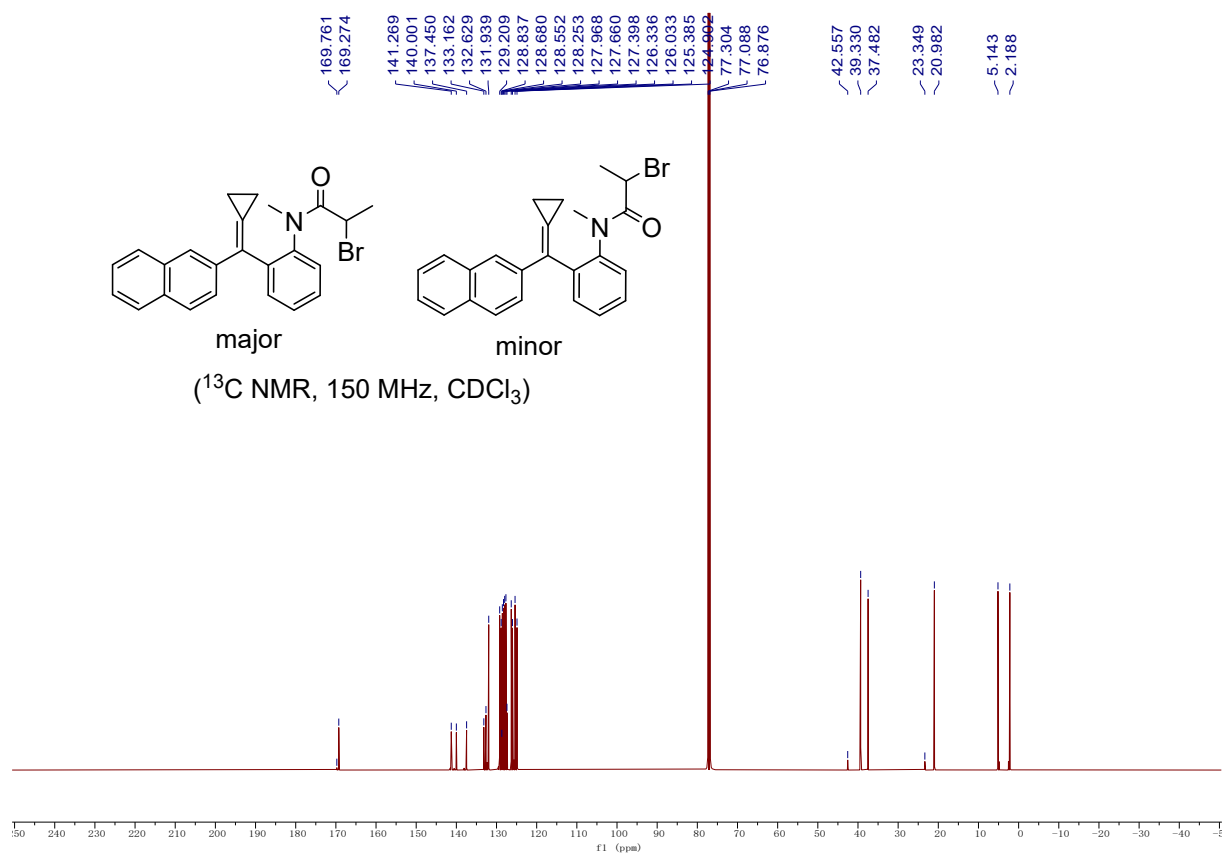

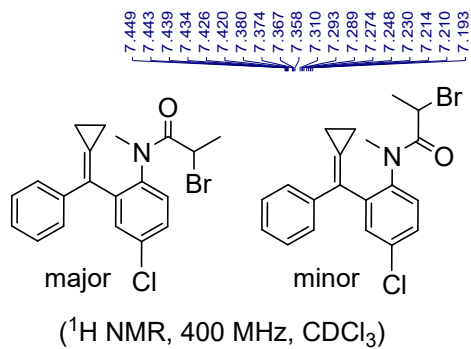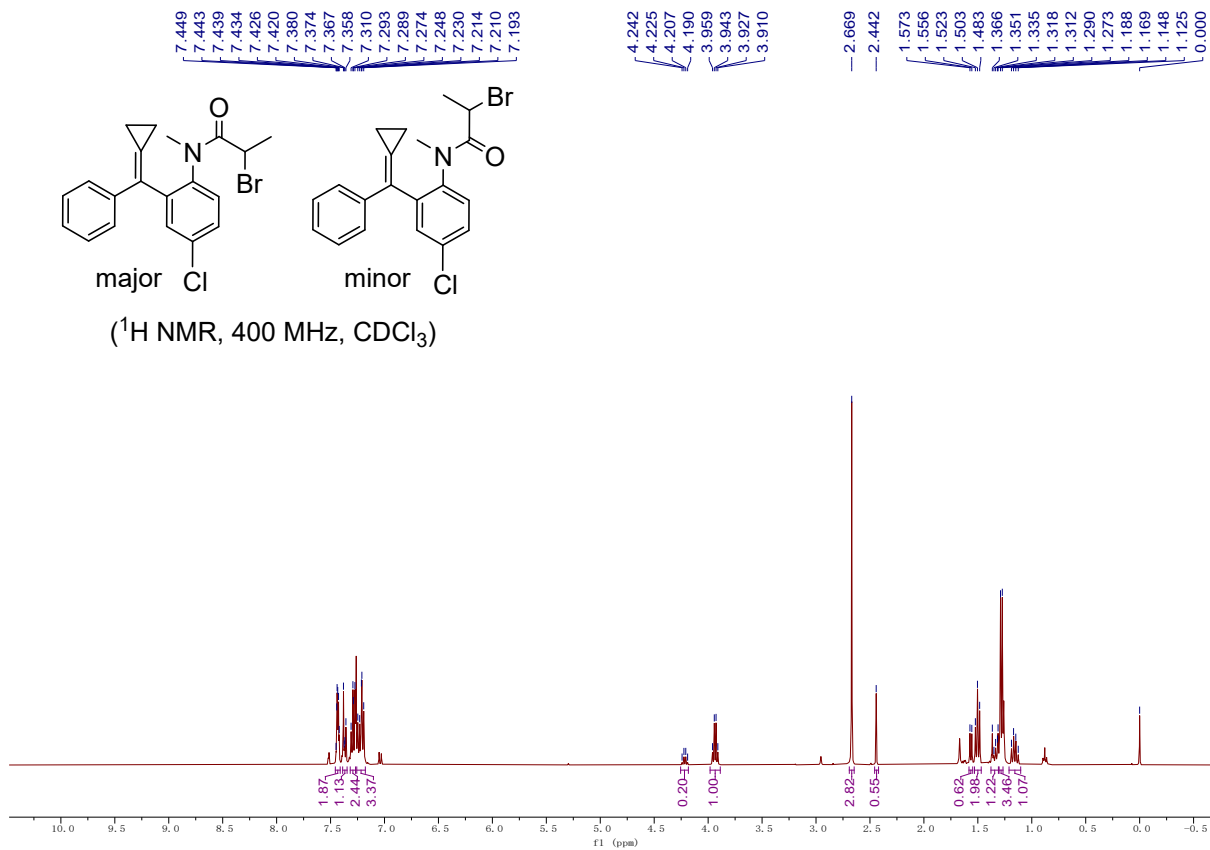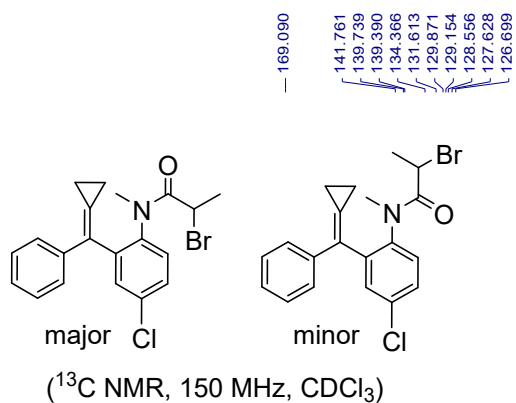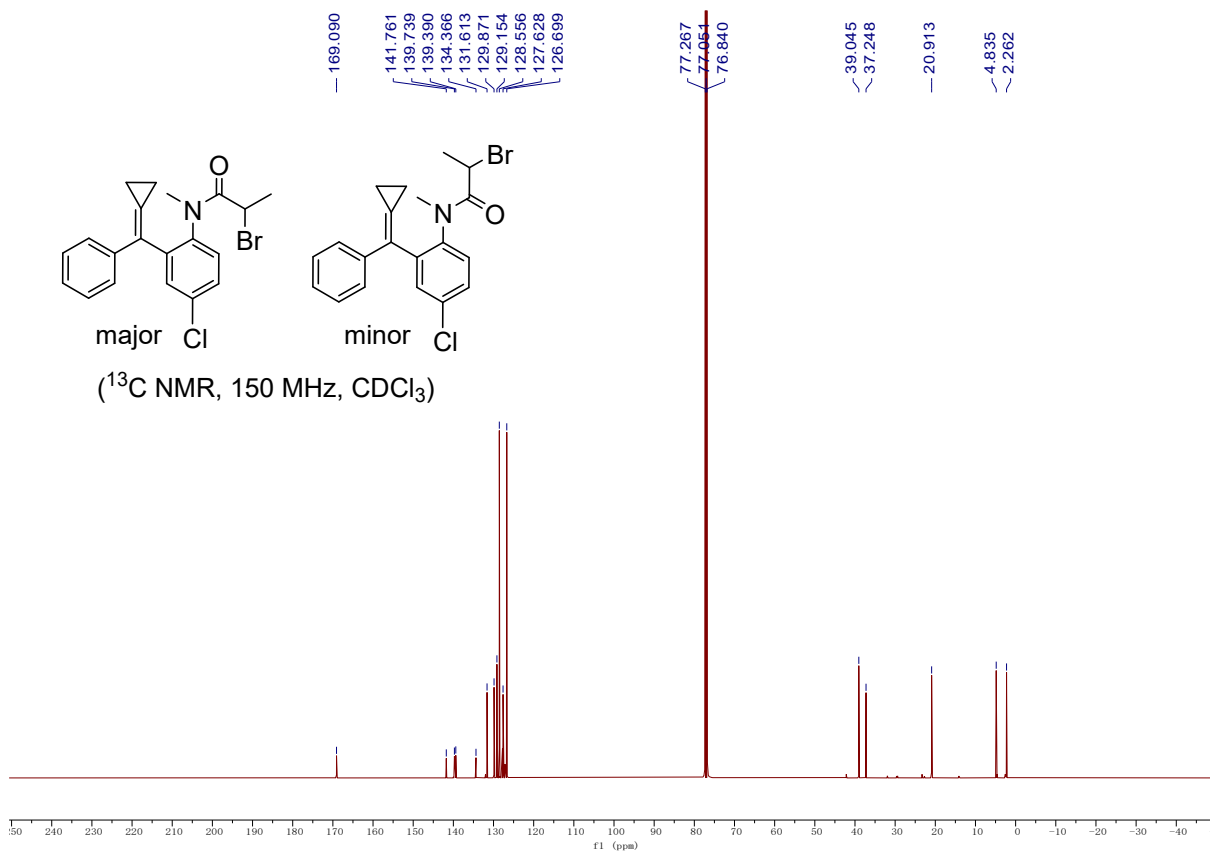

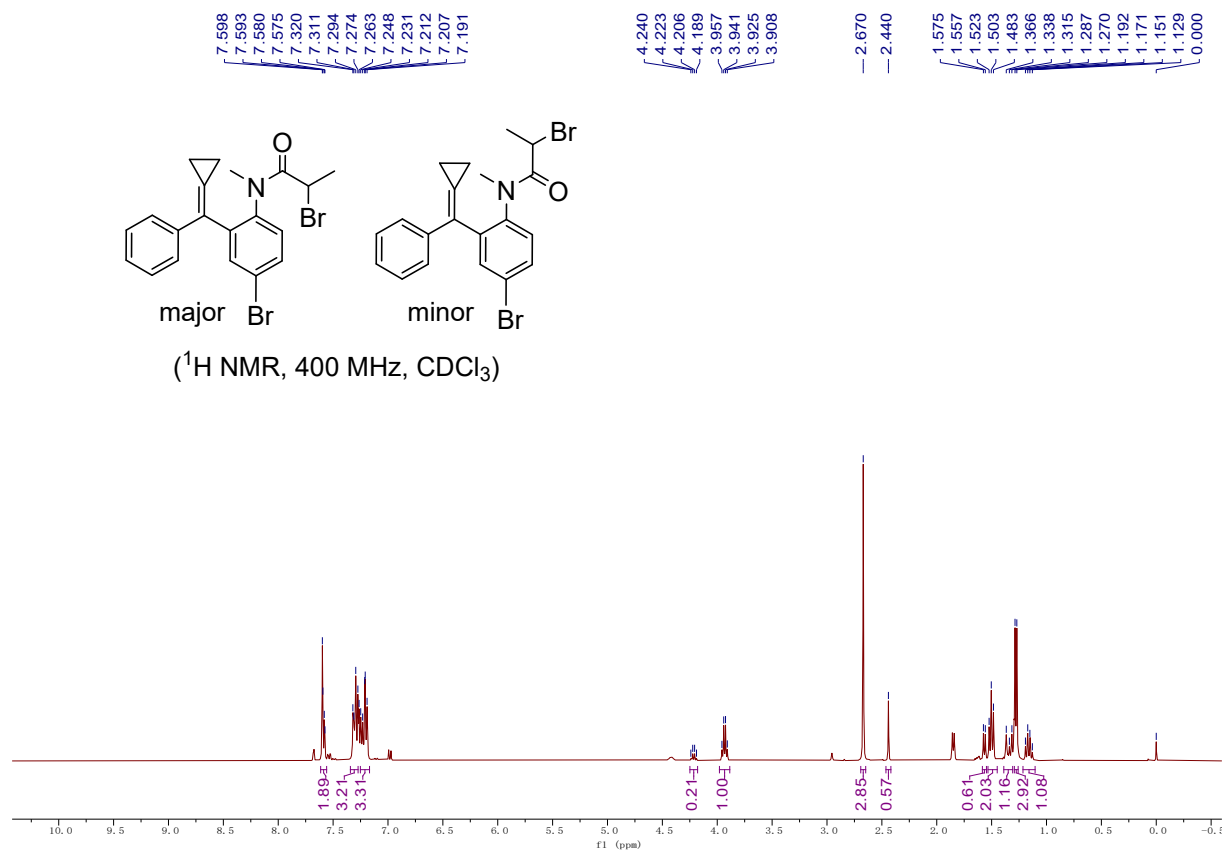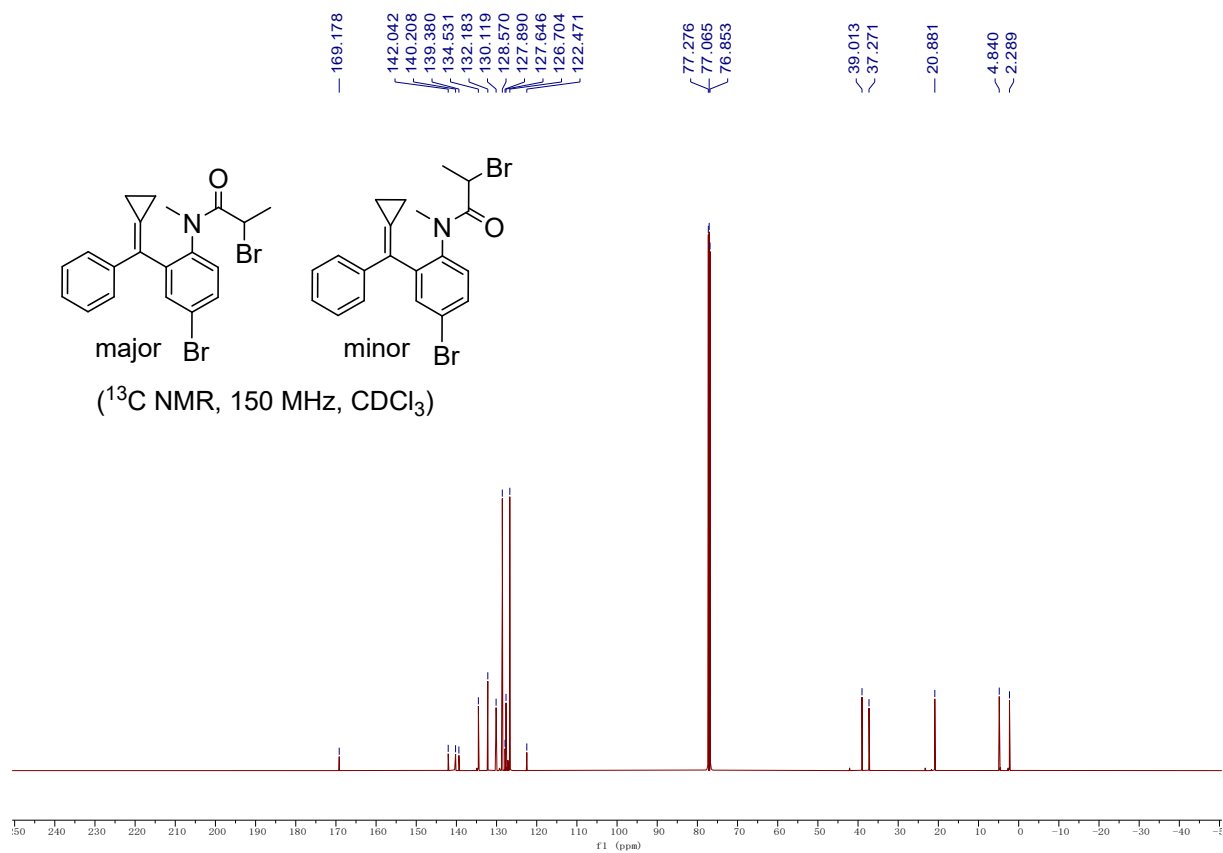

7.348  
7.346  
7.340  
7.329  
7.323  
7.321  
7.299  
7.287  
7.284  
7.281  
7.277  
7.263  
7.249  
7.245  
7.238  
7.233  
7.227  
7.223  
7.218  
7.212  
7.205  
6.992  
6.975  
6.968  
6.957  
6.951

4.303  
4.286  
4.268  
4.251  
4.026  
4.009  
3.993  
3.976  
3.887

2.672  
2.441  
1.574  
1.557  
1.547  
1.510  
1.489  
1.470  
1.297  
1.285  
1.281  
1.274  
1.269  
1.253  
1.160  
1.154  
1.141  
1.137  
1.120  
1.116  
1.104  
1.098  
0.000

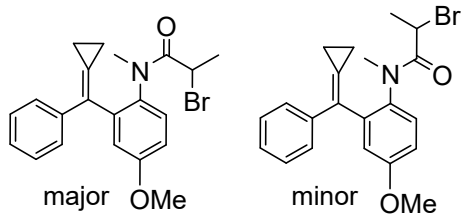

(<sup>1</sup>H NMR, 400 MHz, CDCl<sub>3</sub>)

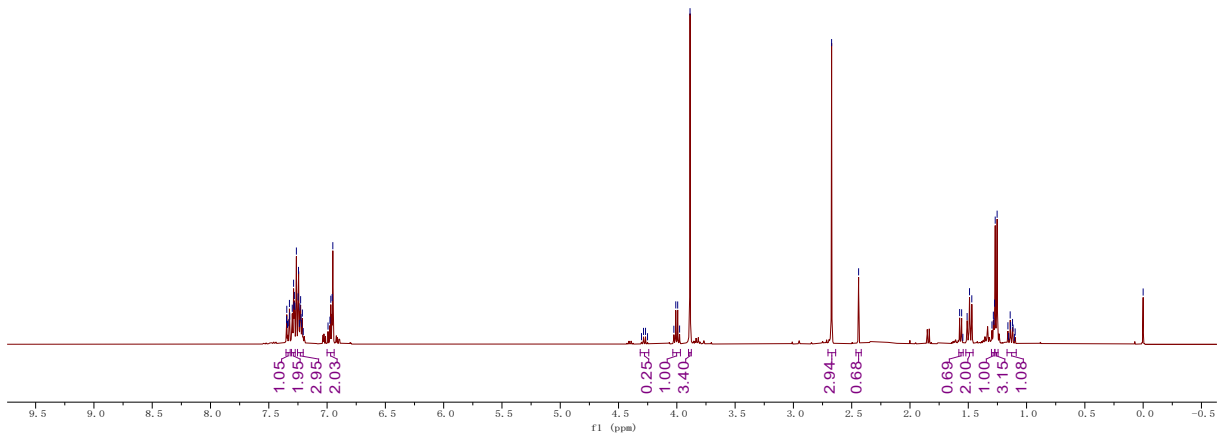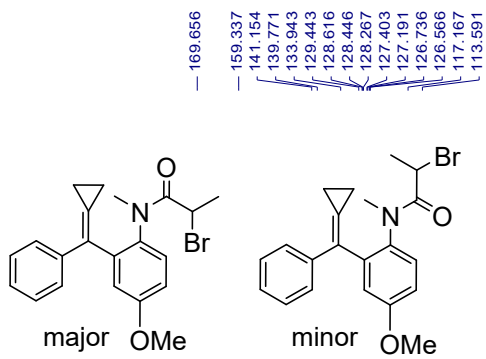

(<sup>13</sup>C NMR, 150 MHz, CDCl<sub>3</sub>)

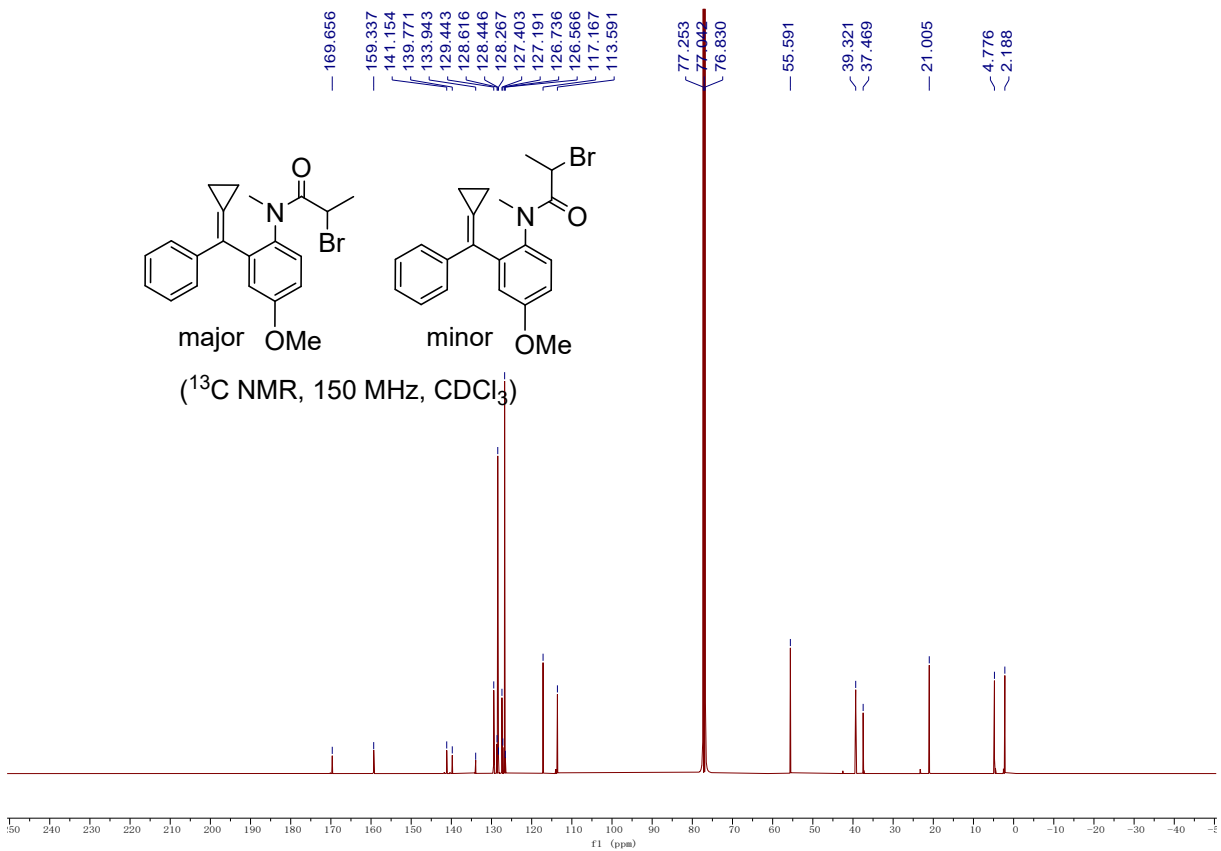

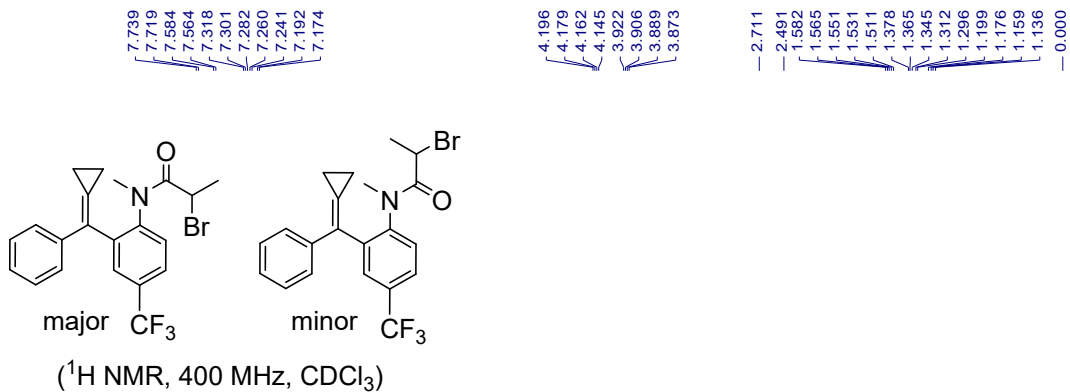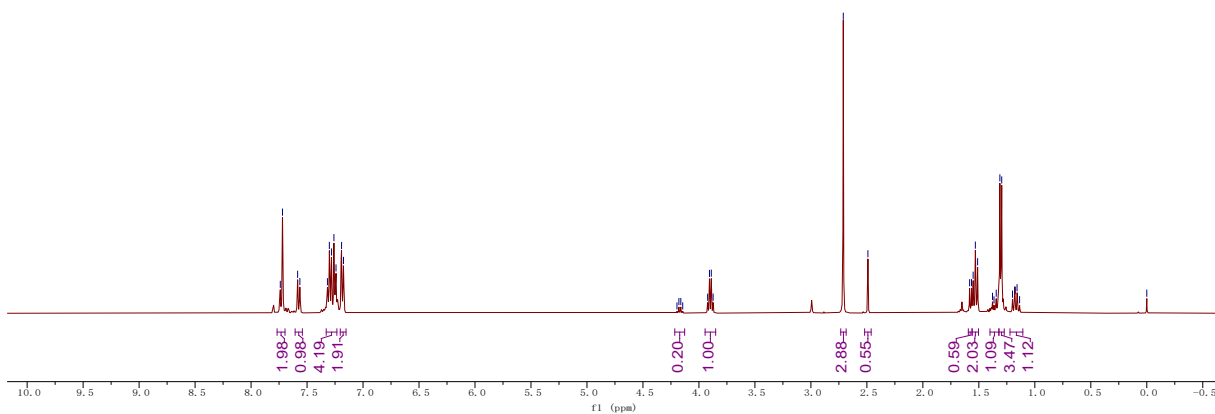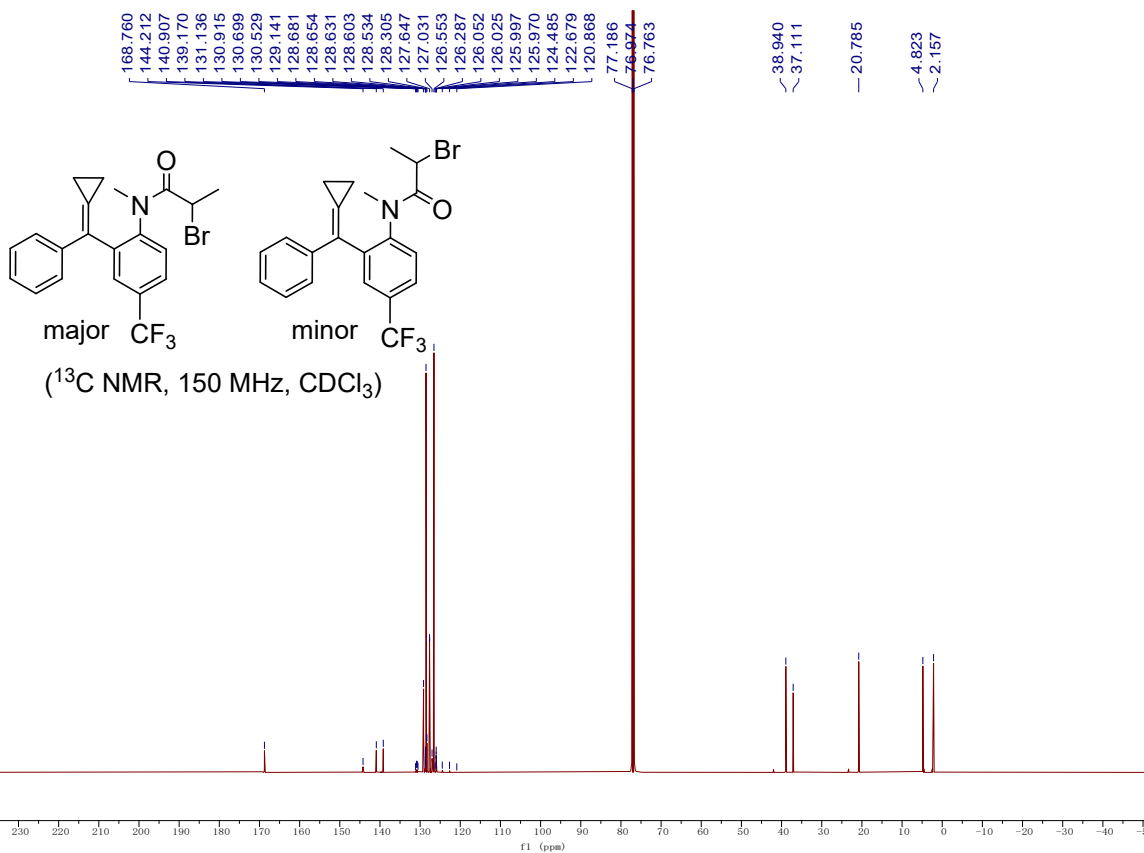



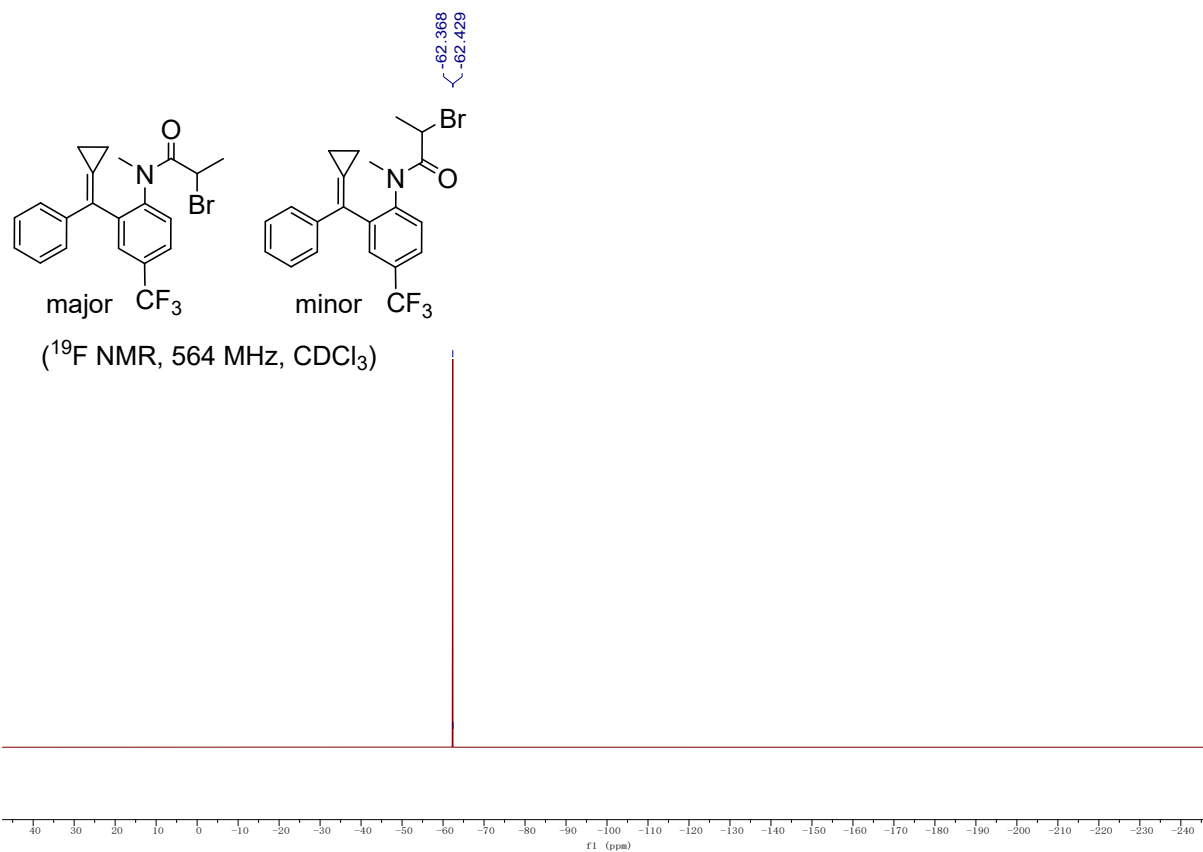

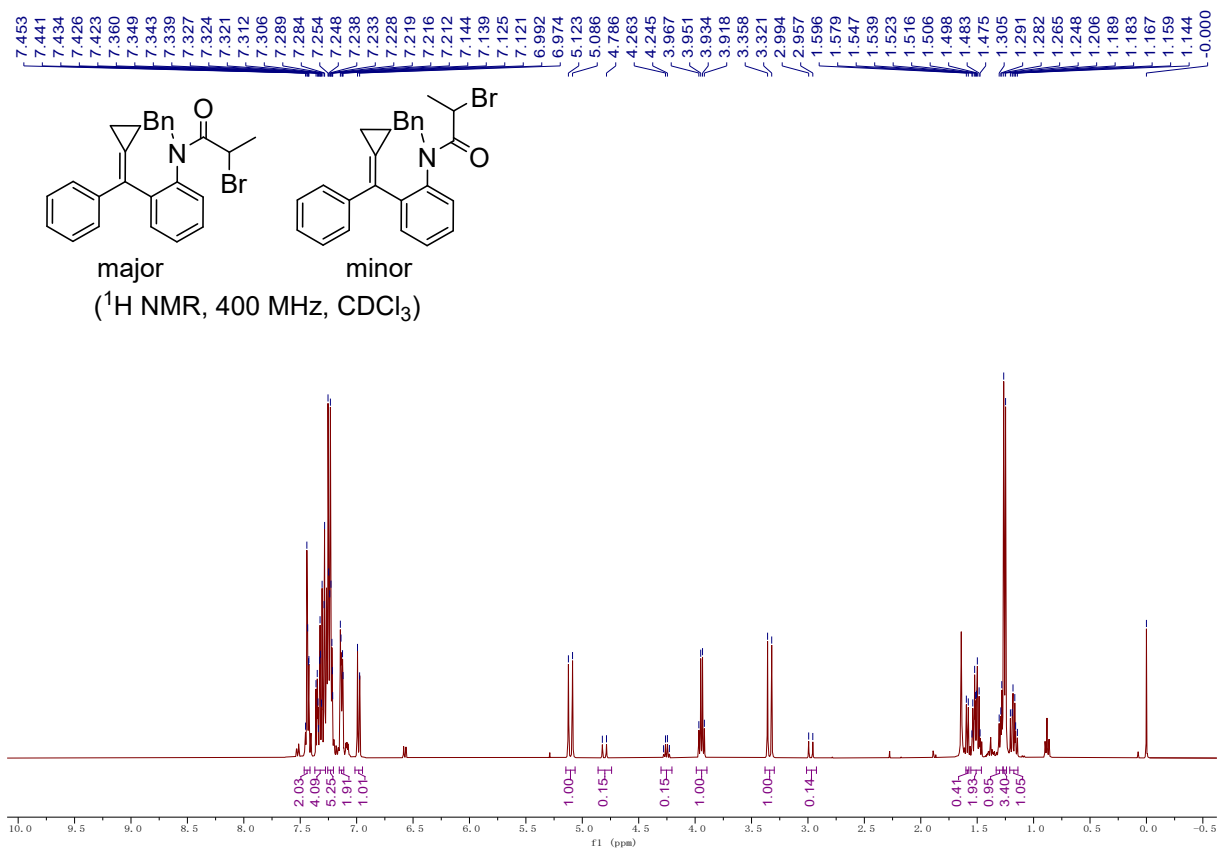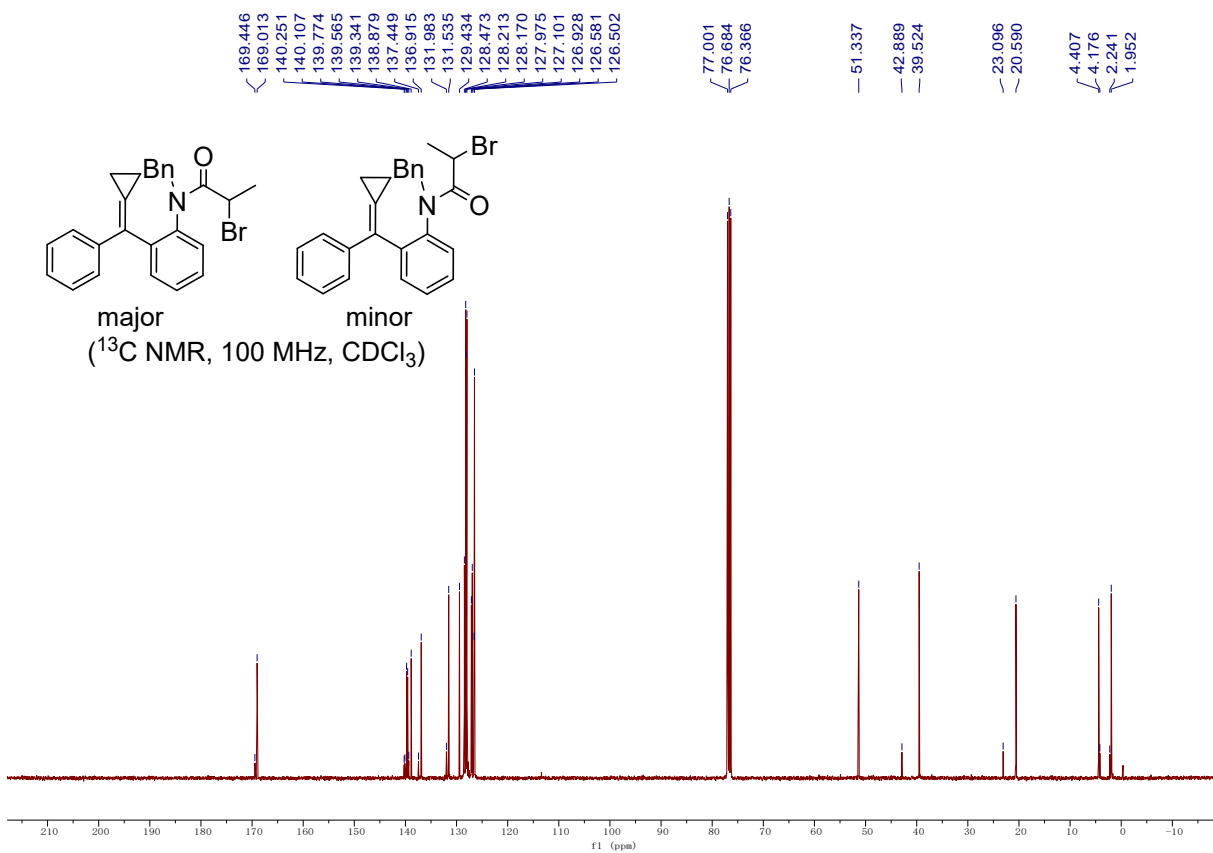

7.499  
7.485  
7.480  
7.466  
7.461  
7.456  
7.448  
7.437  
7.418  
7.413  
7.286  
7.265  
7.261  
7.221  
7.203  
3.855  
3.838  
3.660  
3.651  
3.645  
3.637  
3.626  
2.475  
2.463  
2.455  
2.450  
1.615  
1.598  
1.553  
1.550  
1.544  
1.534  
1.527  
1.510  
1.504  
1.487  
1.478  
1.463  
1.455  
1.432  
1.417  
1.389  
1.375  
1.372  
1.366  
1.363  
1.259  
1.253  
1.241  
1.223  
1.218  
1.206  
1.199  
1.192  
1.183  
1.166  
1.157  
1.148  
1.141  
1.126  
1.126  
0.841  
0.823  
0.804  
-0.000

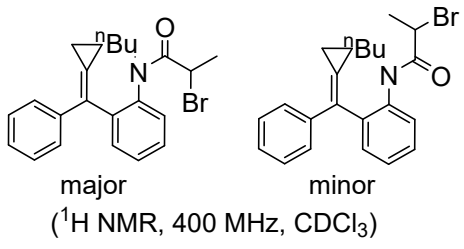

(<sup>1</sup>H NMR, 400 MHz, CDCl<sub>3</sub>)

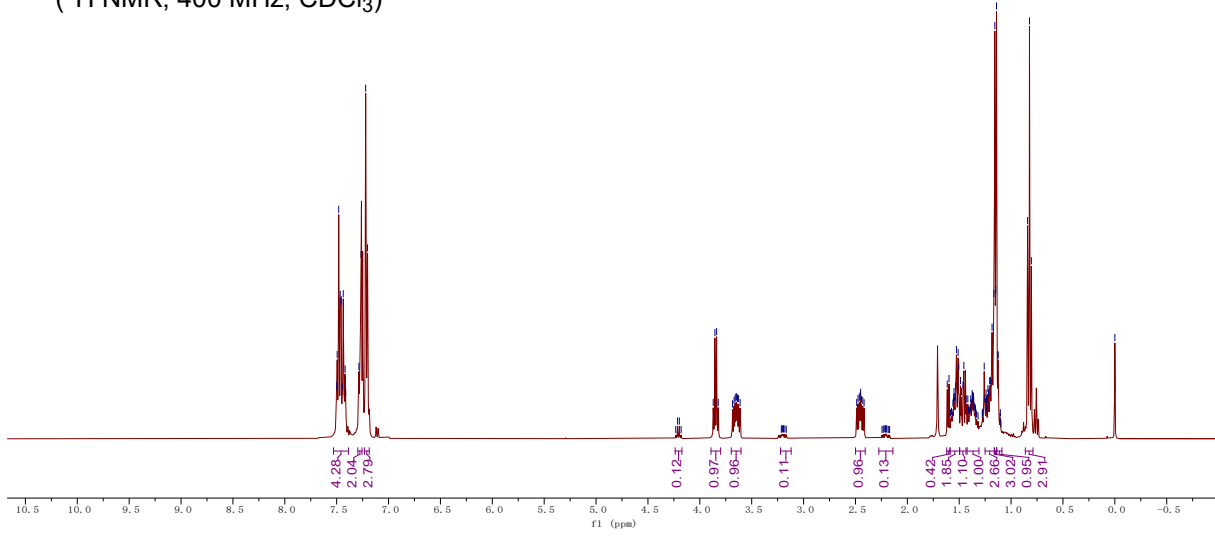

168.925  
140.074  
139.992  
139.909  
132.109  
129.549  
128.703  
128.515  
128.464  
127.320  
126.727  
77.276  
77.065  
76.853  
48.909  
40.254  
29.140  
21.009  
20.099  
13.803  
4.762  
2.262

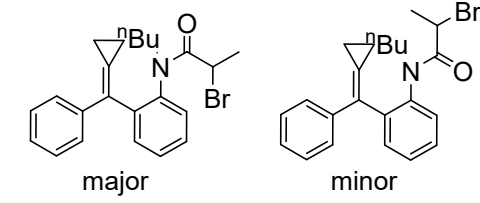

(<sup>13</sup>C NMR, 150 MHz, CDCl<sub>3</sub>)

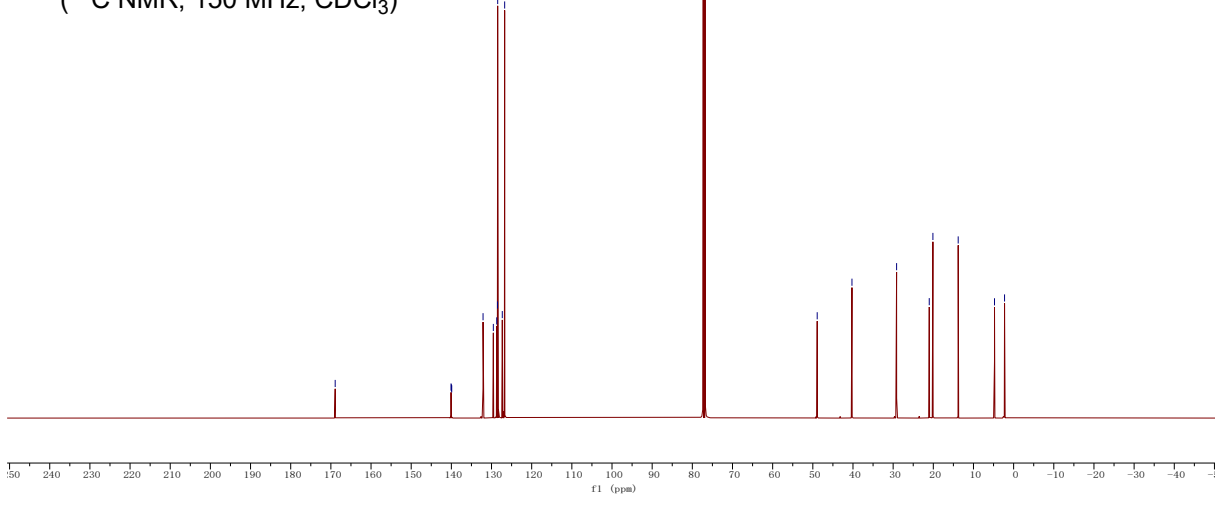

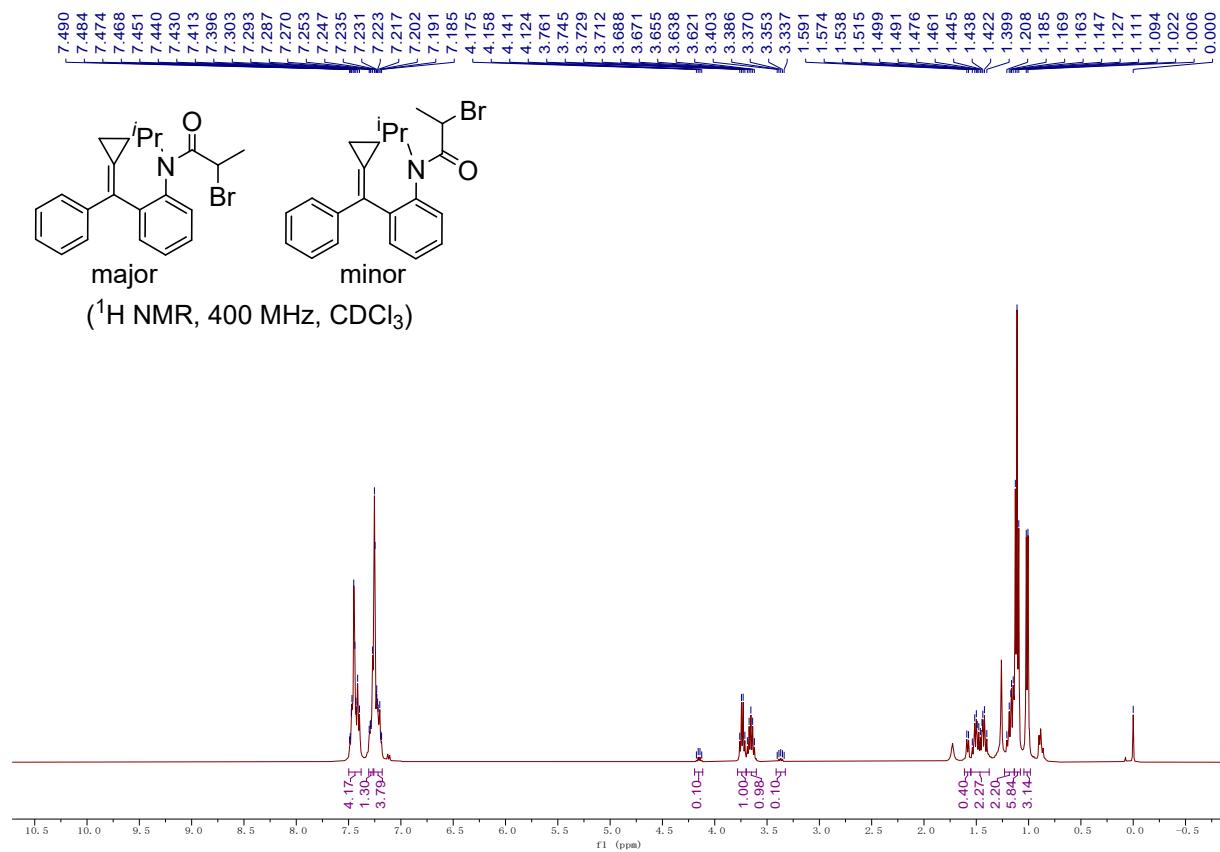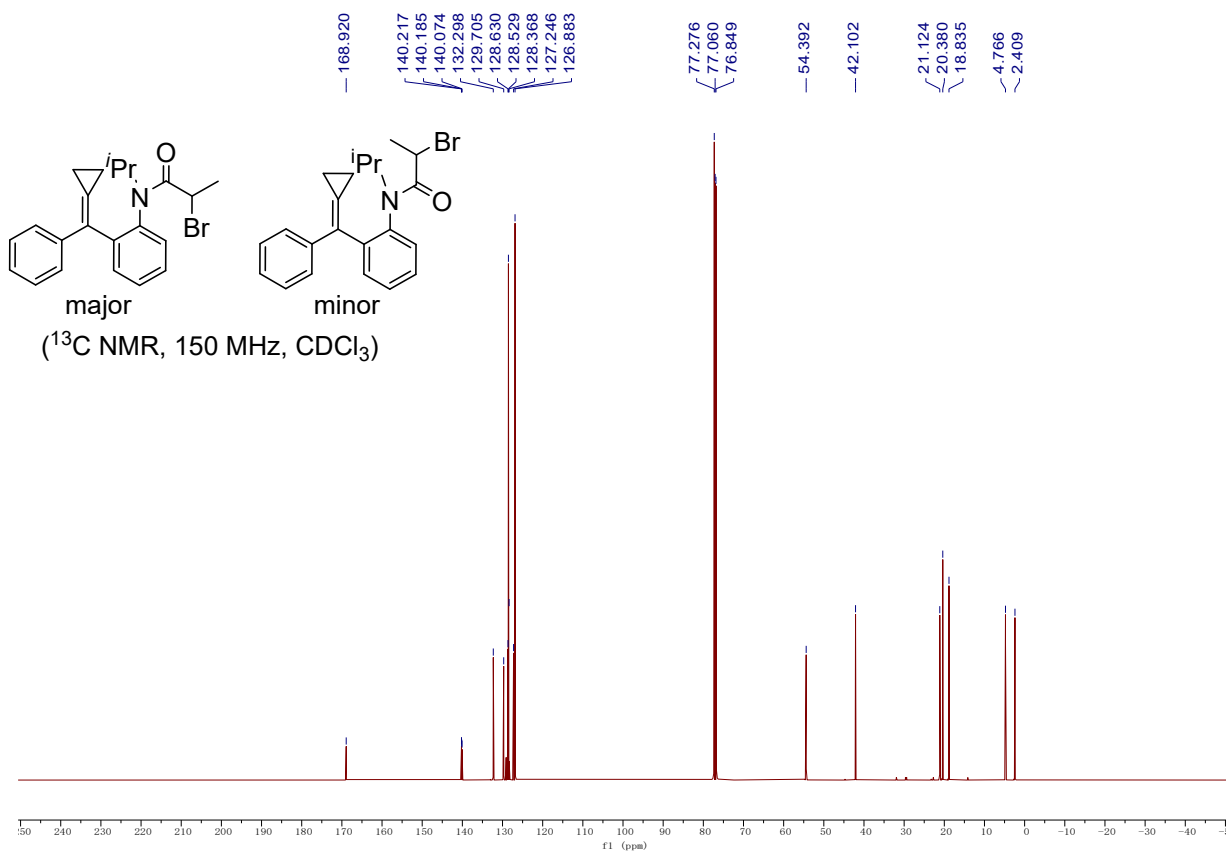

7.504  
7.489  
7.495  
7.484  
7.478  
7.474  
7.467  
7.457  
7.445  
7.439  
7.426  
7.420  
7.416  
7.288  
7.289  
7.262  
7.251  
7.217  
7.204  
7.198  
4.209  
4.191  
3.878  
3.862  
3.846  
3.829  
3.699  
3.681  
3.663  
3.647  
3.629  
3.611  
3.611  
2.564  
2.547  
2.529  
2.512  
2.512  
2.495  
2.477  
2.477  
1.523  
1.515  
1.500  
1.492  
1.482  
1.477  
1.468  
1.459  
1.444  
1.435  
1.421  
1.421  
1.233  
1.218  
1.210  
1.195  
1.183  
1.167  
1.163  
1.147  
1.139  
1.123  
1.115  
1.100  
1.060  
1.042  
1.024  
-0.000

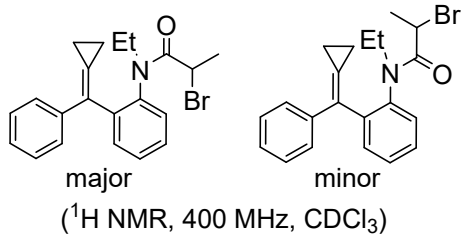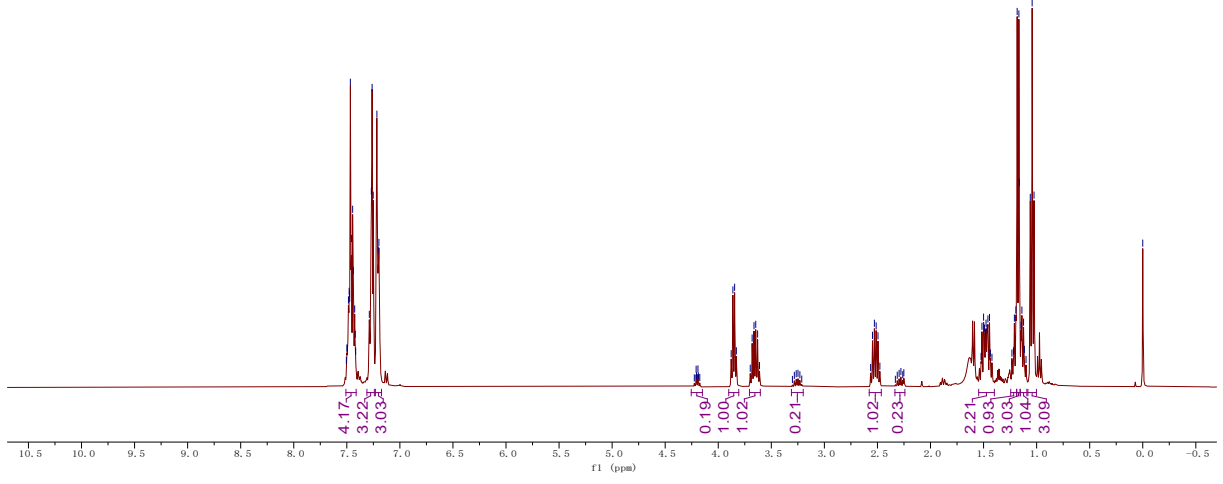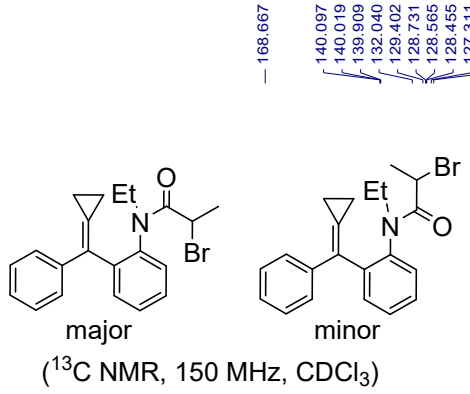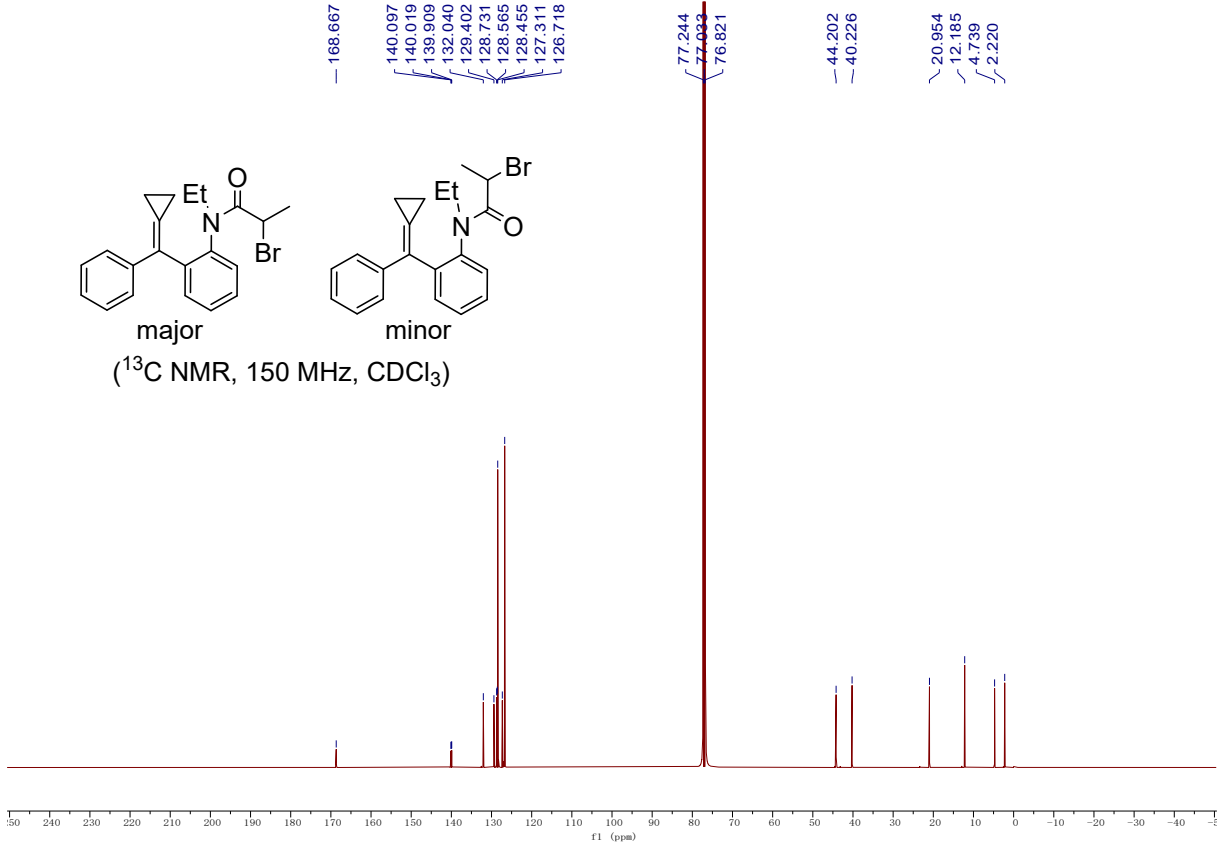

7.474  
7.456  
7.445  
7.435  
7.419  
7.303  
7.284  
7.266  
7.239  
7.221  
7.200  
5.821  
5.813  
5.809  
5.801  
5.796  
5.784  
5.778  
5.771  
5.767  
5.759  
5.752  
5.741  
5.105  
5.096  
5.083  
5.079  
5.054  
5.050  
4.171  
4.167  
4.163  
4.137  
4.133  
4.129  
4.125  
3.963  
3.947  
3.930  
3.914  
2.975  
2.957  
2.937  
2.919  
1.593  
1.576  
1.510  
1.503  
1.493  
1.487  
1.480  
1.470  
1.465  
1.296  
1.283  
1.263  
1.246  
1.221  
1.159  
1.137  
1.120  
1.114  
1.097  
0.000

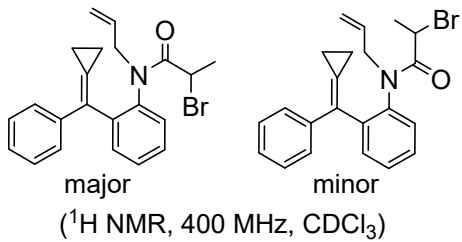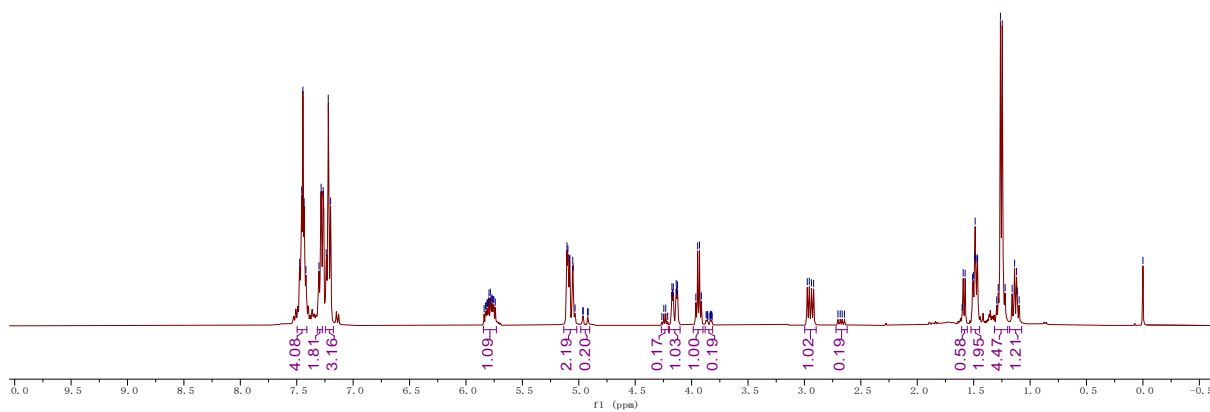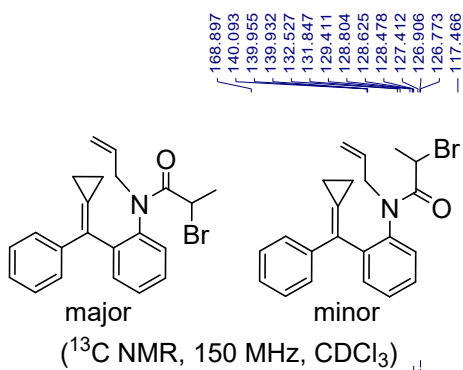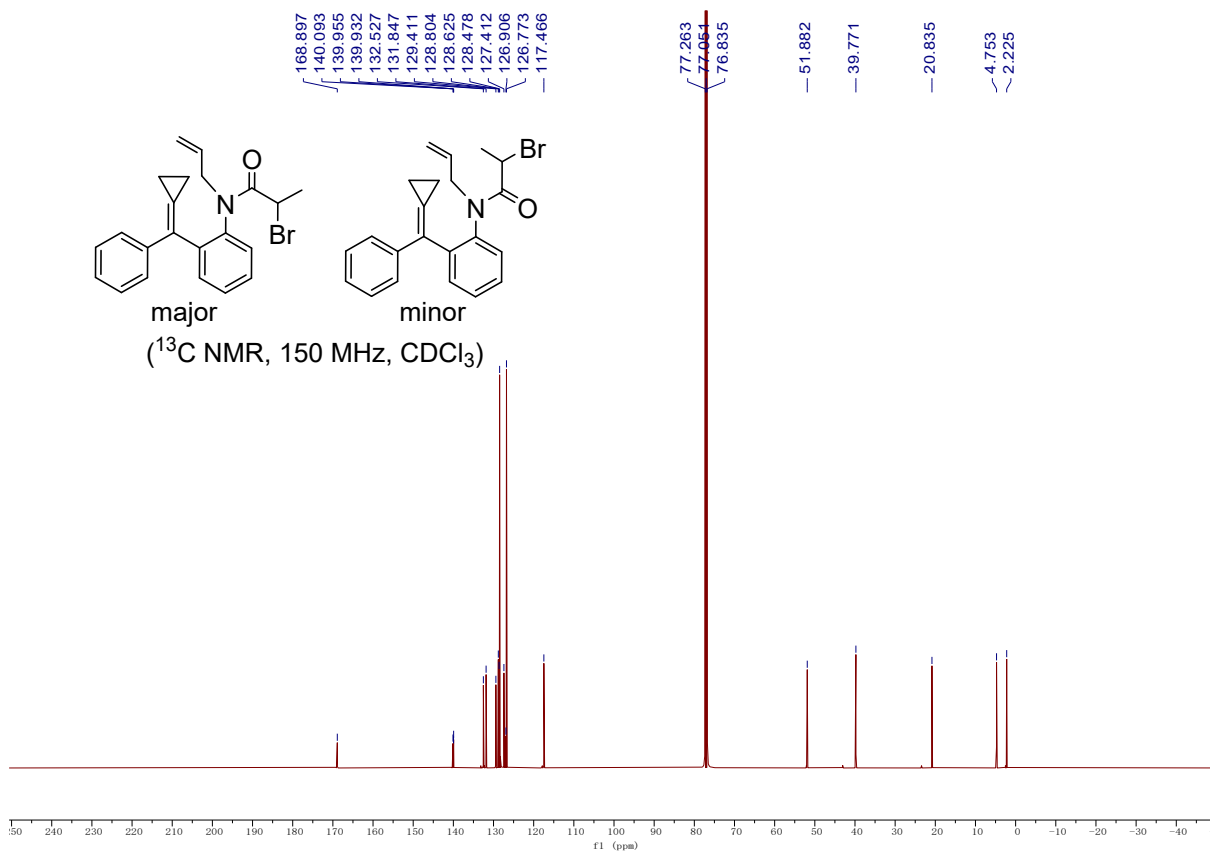

7.904  
7.883  
7.874  
7.854  
7.851  
7.836  
7.832  
7.817  
7.813  
7.568  
7.564  
7.554  
7.549  
7.545  
7.535  
7.531  
7.384  
7.380  
7.363  
7.360  
7.320  
7.313  
7.307  
7.300  
7.294  
7.280  
7.216  
7.212  
7.209  
7.199  
7.194  
7.176  
3.623  
3.507  
3.491  
3.475  
2.436  
2.426  
1.684  
1.670  
1.664  
1.661  
1.648  
1.645  
1.640  
1.623  
1.484  
1.469  
1.461  
1.446  
1.424  
1.402  
1.378  
1.363  
1.357  
1.342  
1.208  
1.192  
1.183  
1.168  
1.161  
1.147  
0.728  
0.712  
0.000

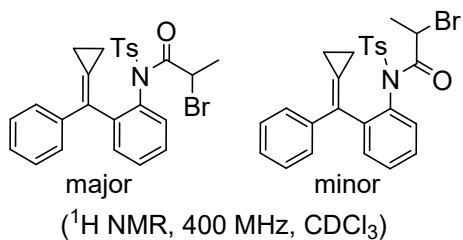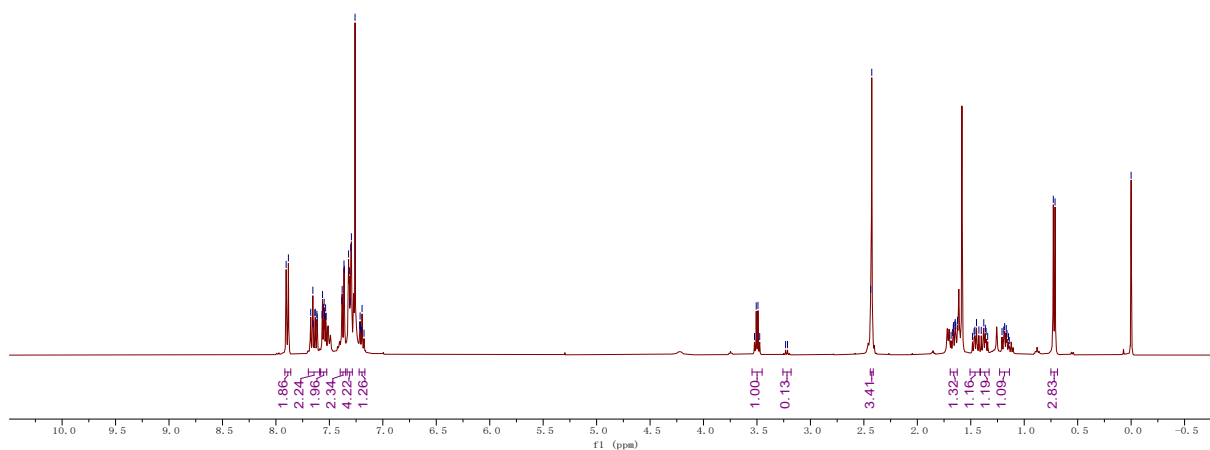

168.085  
144.877  
144.458  
143.288  
139.764  
135.583  
133.800  
132.803  
132.095  
130.716  
130.543  
129.568  
129.250  
129.192  
128.694  
128.521  
128.117  
127.163  
127.134  
126.752  
126.073

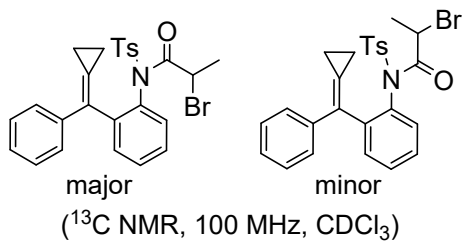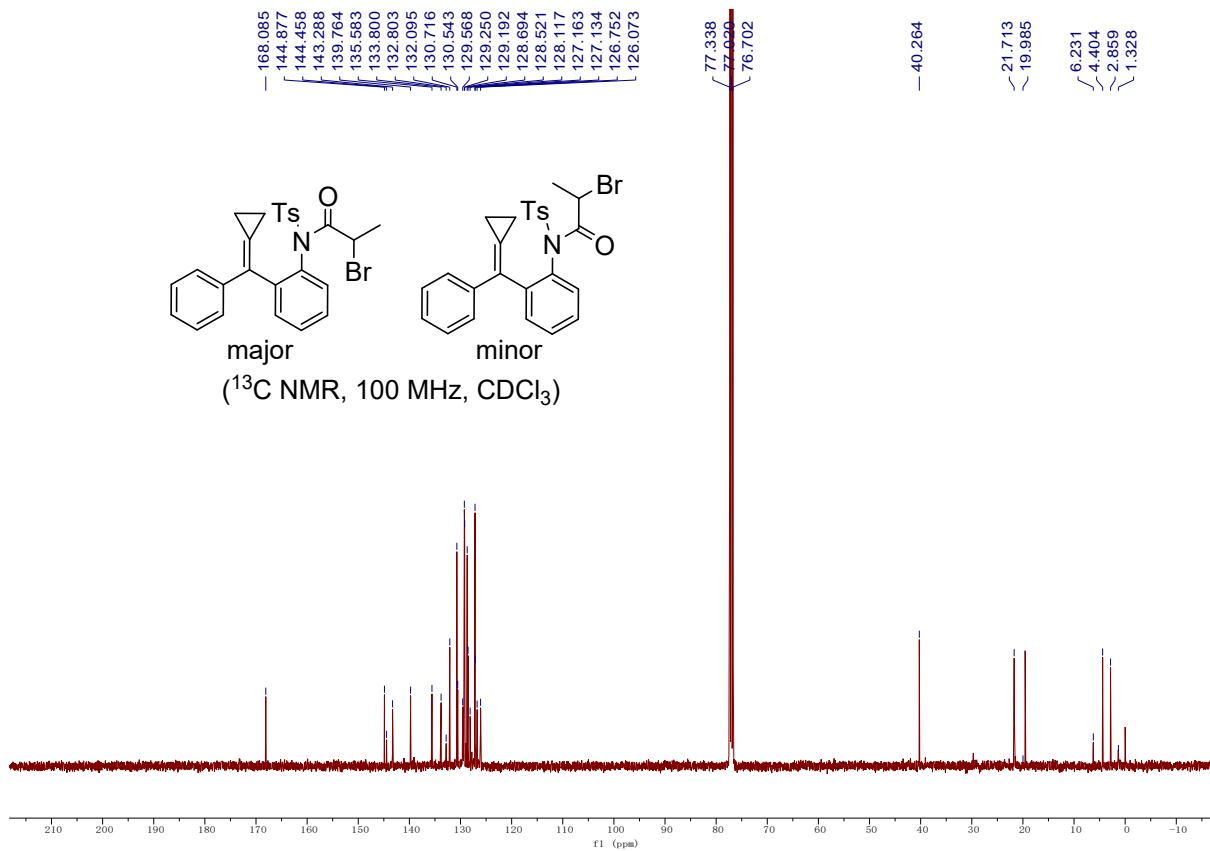

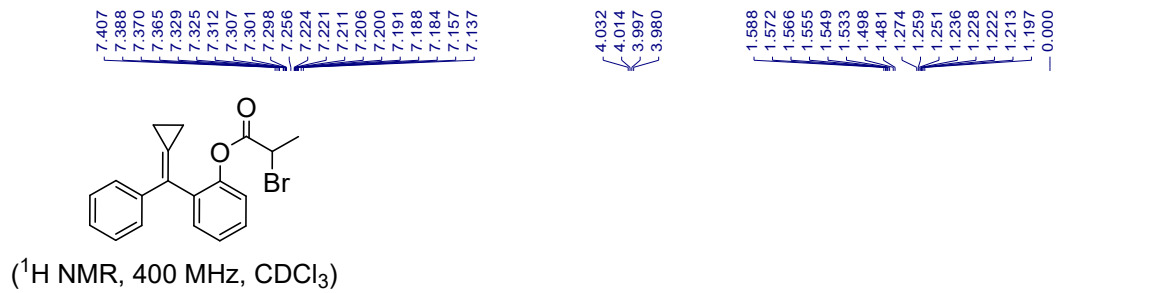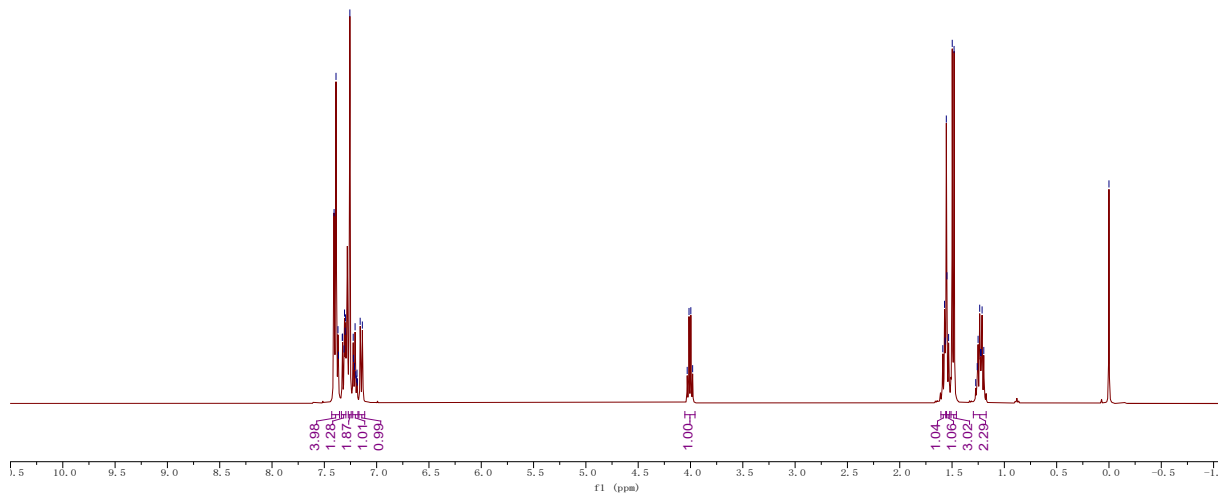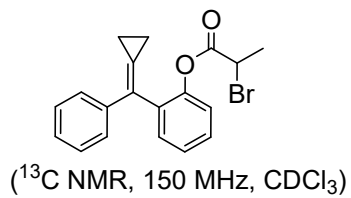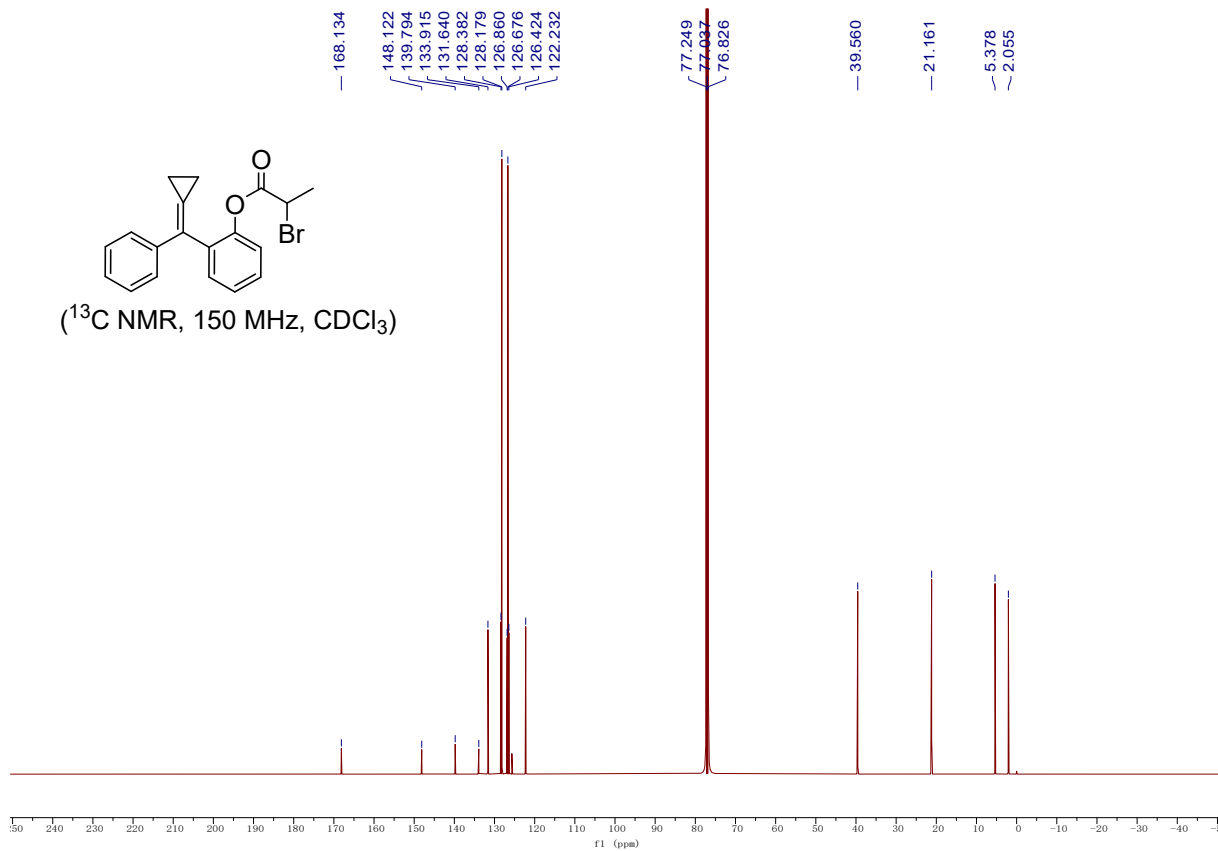



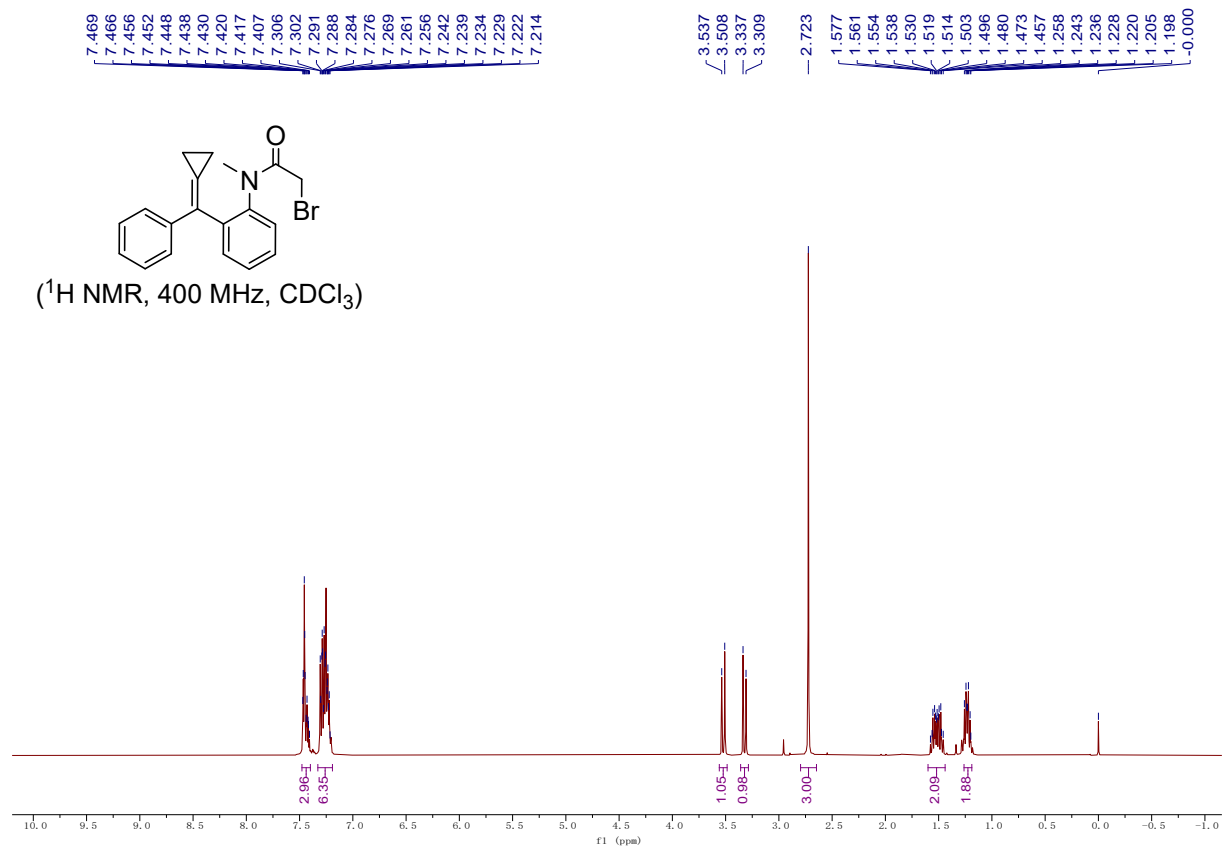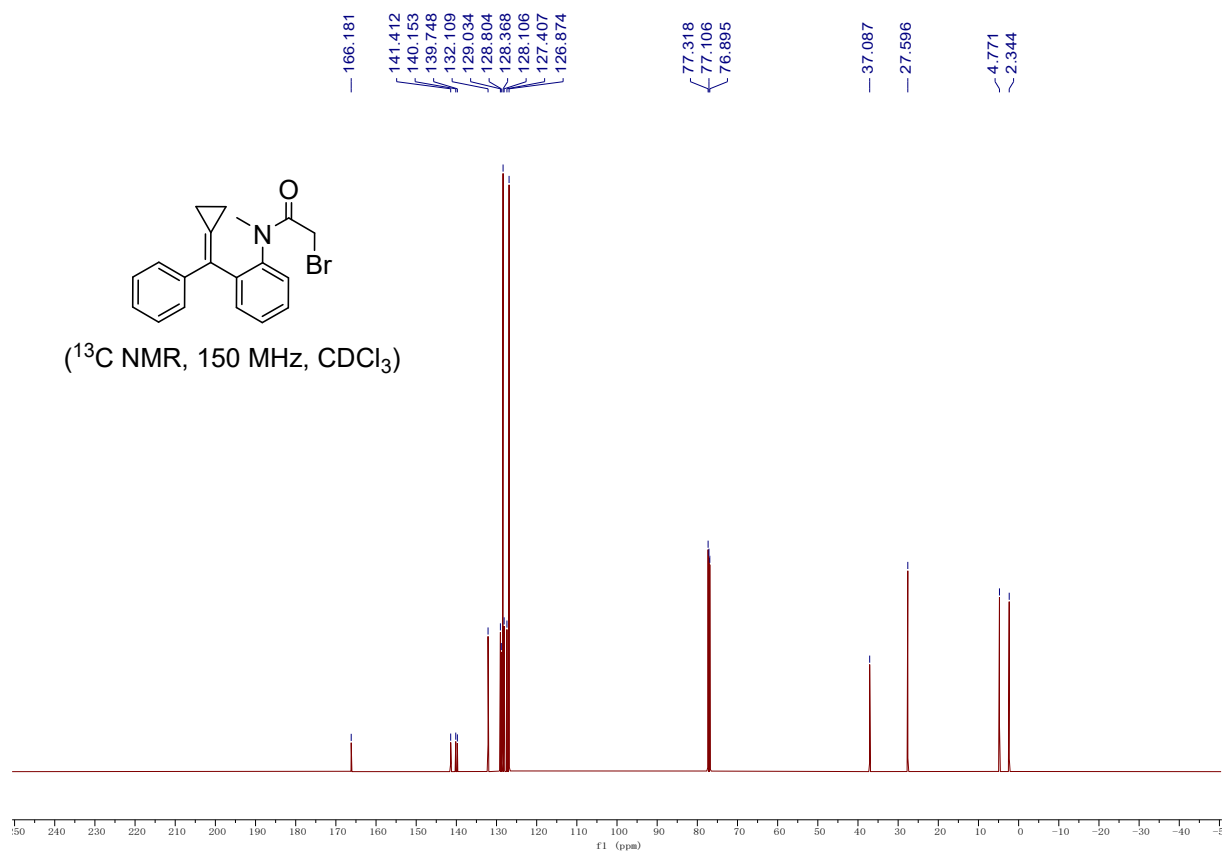

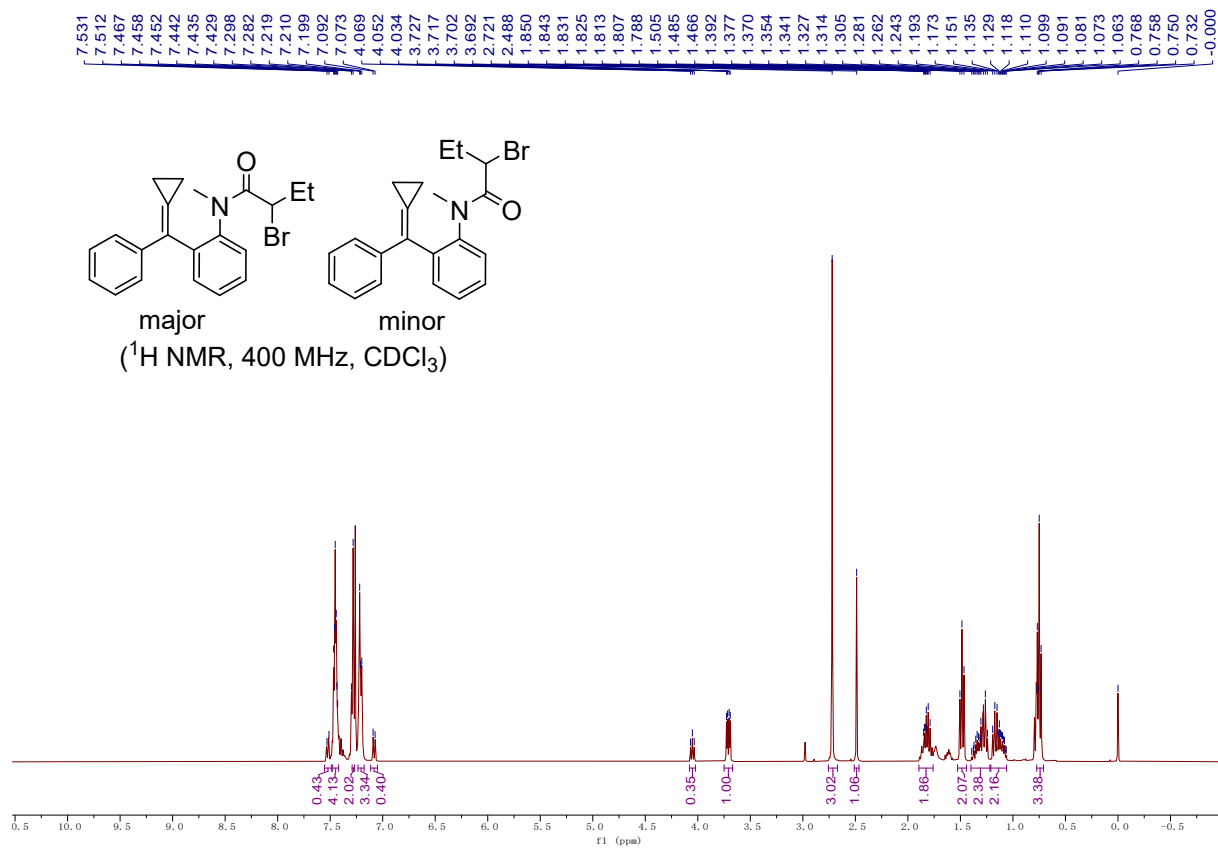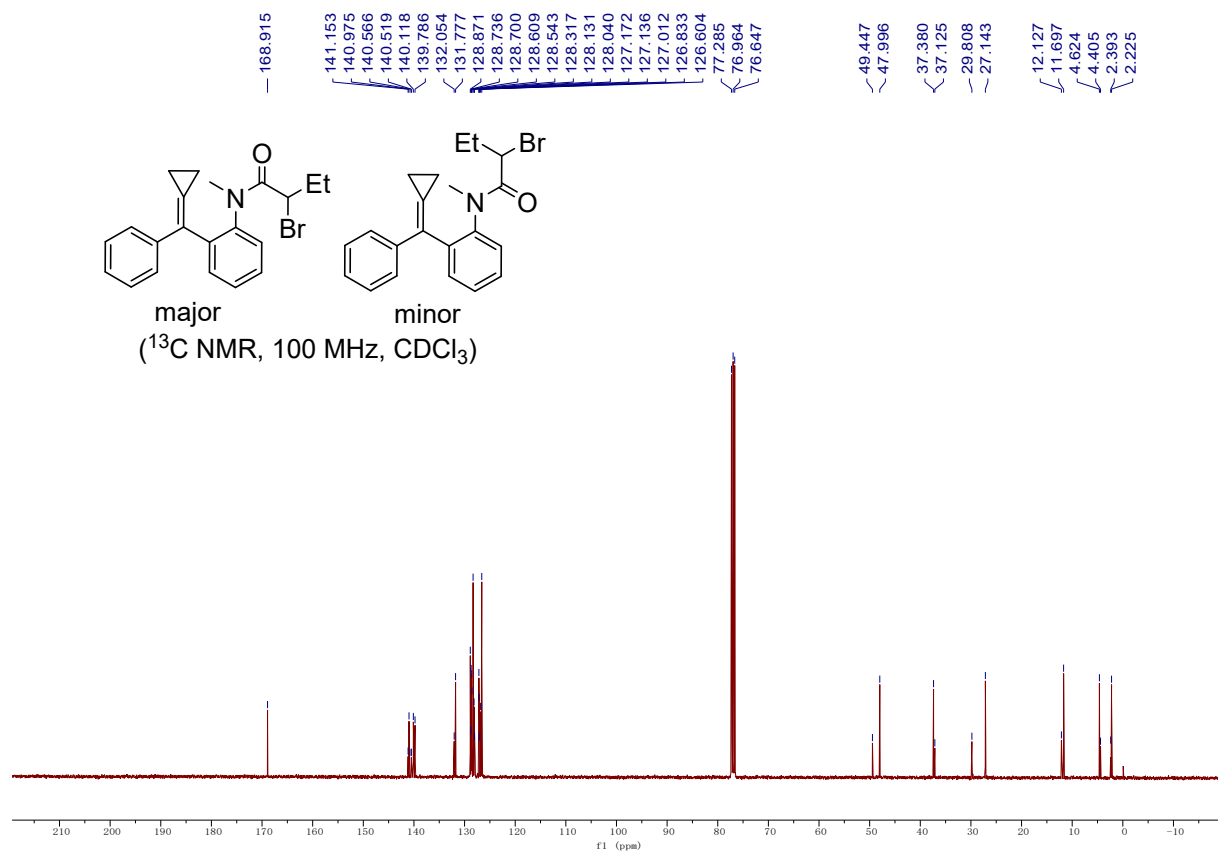

7.463  
7.455  
7.449  
7.442  
7.434  
7.429  
7.295  
7.286  
7.279  
7.228  
7.220  
7.212  
7.201  
4.149  
4.134  
4.127  
4.113  
3.772  
3.761  
3.747  
3.736  
3.718  
2.718  
2.487  
1.839  
1.829  
1.819  
1.813  
1.804  
1.799  
1.791  
1.778  
1.767  
1.759  
1.745  
1.498  
1.477  
1.458  
1.355  
1.343  
1.330  
1.317  
1.306  
1.290  
1.283  
1.275  
1.205  
1.188  
1.168  
1.148  
1.126  
1.119  
1.112  
1.107  
1.100  
1.094  
1.091  
1.082  
1.071  
1.060  
1.055  
1.051  
0.880  
0.862  
0.844  
0.000

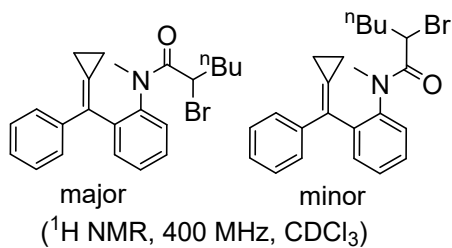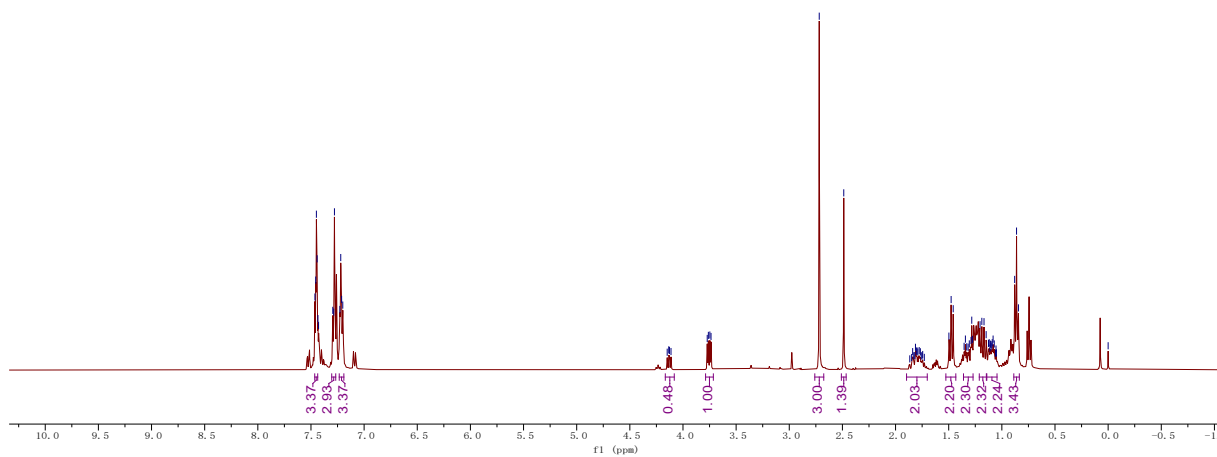

169.141  
141.044  
140.244  
139.840  
132.123  
131.870  
128.961  
128.873  
128.786  
128.708  
128.662  
128.400  
128.235  
128.055  
127.302  
127.233  
127.127  
126.961  
126.718  
77.286  
77.074  
76.863  
48.182  
46.597  
37.565  
37.230  
35.809  
33.856  
29.600  
29.228  
22.439  
21.460  
14.014  
13.660  
4.725  
4.514  
2.455  
2.376

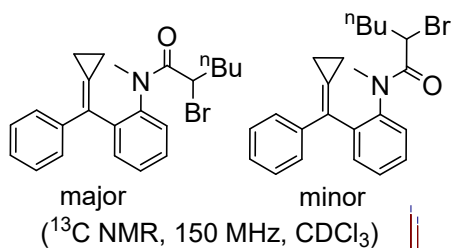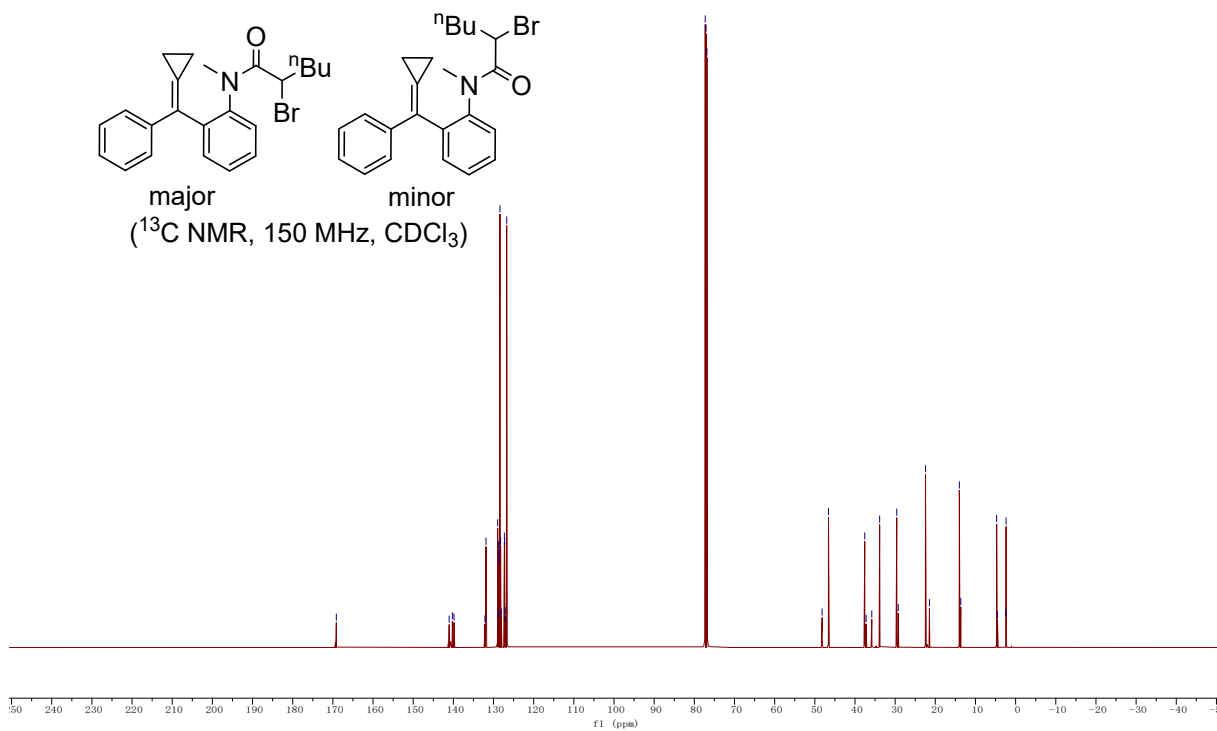

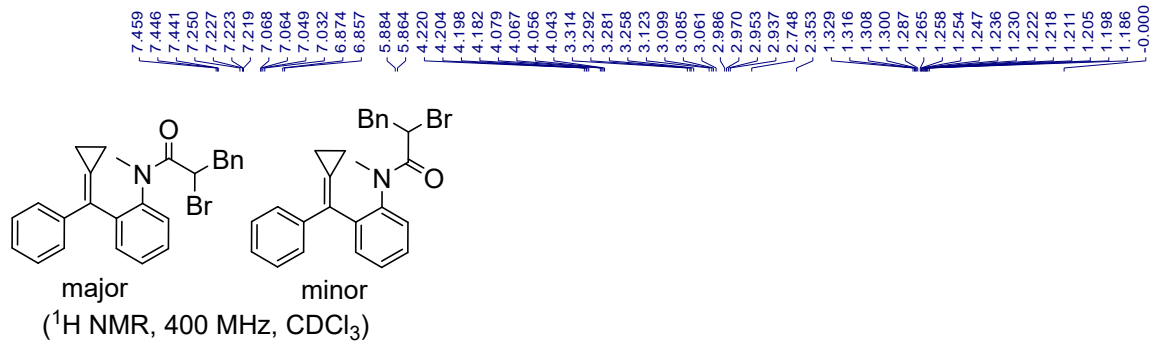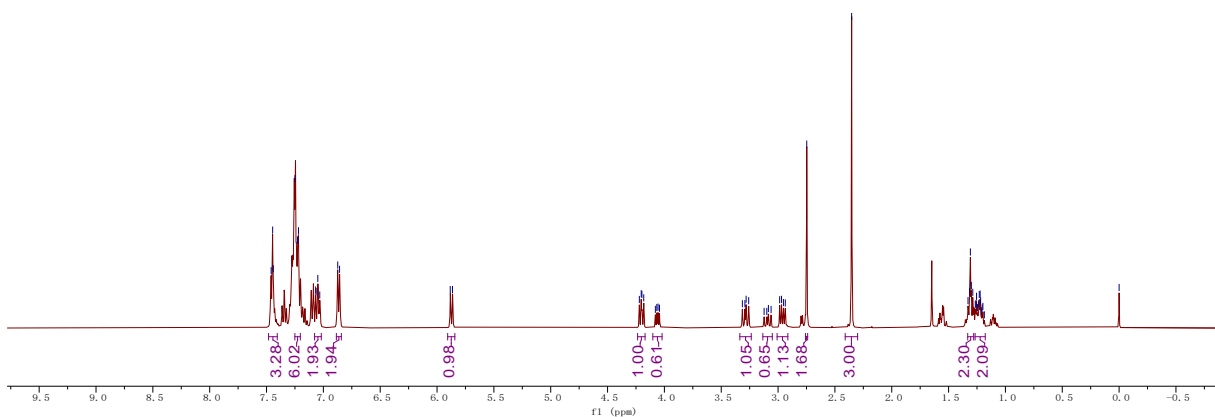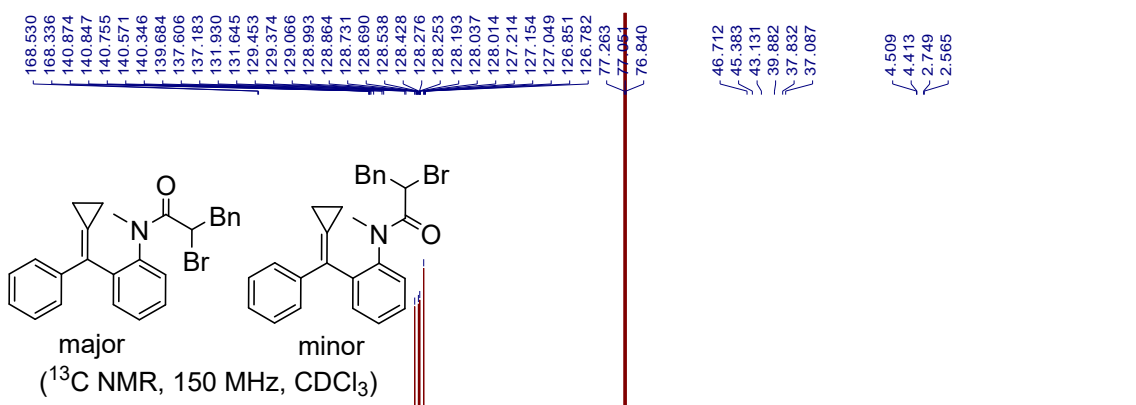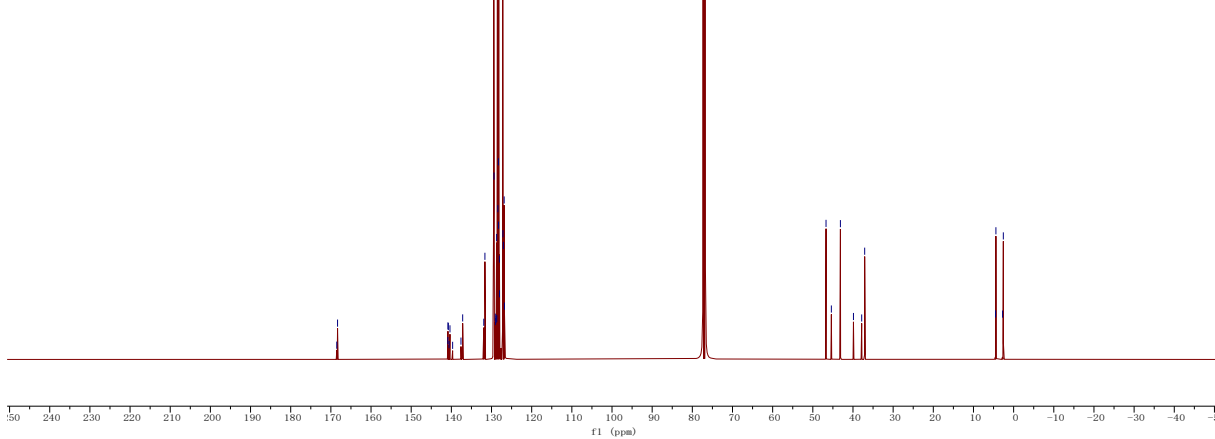

7.447  
7.445  
7.442  
7.438  
7.432  
7.429  
7.427  
7.422  
7.387  
7.385  
7.383  
7.380  
7.376  
7.374  
7.371  
7.363  
7.360  
7.353  
7.350  
7.349  
7.332  
7.329  
7.326  
7.319  
7.317  
7.289  
7.254  
7.245  
7.234  
7.197  
7.195  
7.192  
7.182  
7.171  
7.168  
7.157  
4.479  
4.019  
4.011  
4.005  
3.997  
3.647  
3.633  
3.629  
3.615  
3.307  
3.299  
3.289  
3.281  
2.621  
2.494  
1.334  
1.331  
1.324  
1.322  
1.317  
1.314  
1.309  
1.225  
1.216  
1.211  
1.201  
1.195  
0.000

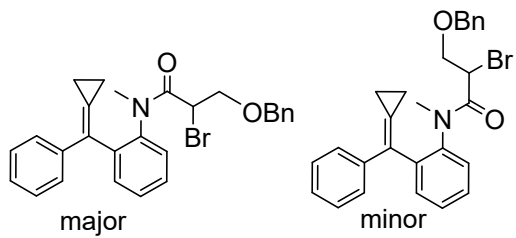

(<sup>1</sup>H NMR, 400 MHz, CDCl<sub>3</sub>)

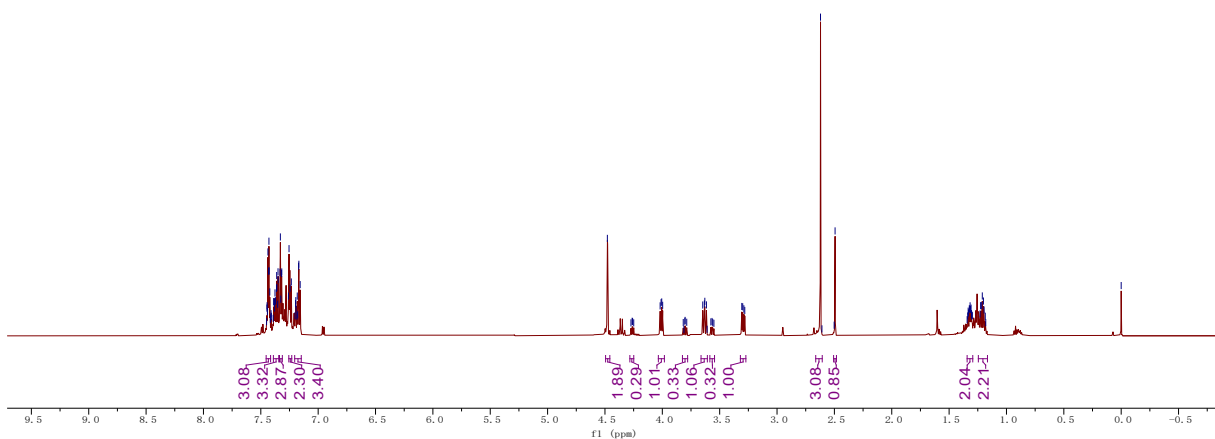

167.403  
140.736  
140.350  
140.281  
137.542  
131.889  
129.007  
128.827  
128.639  
128.474  
128.359  
128.331  
128.262  
128.202  
128.101  
127.945  
127.835  
127.678  
127.223  
127.141  
126.883

77.267  
77.056  
76.844  
74.004  
73.236  
72.565  
71.333

42.993  
42.791  
37.446  
37.036

4.610  
4.495  
2.606  
2.137

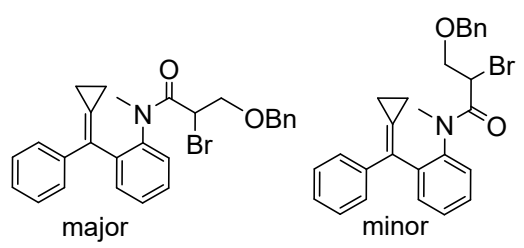

(<sup>13</sup>C NMR, 150 MHz, CDCl<sub>3</sub>)

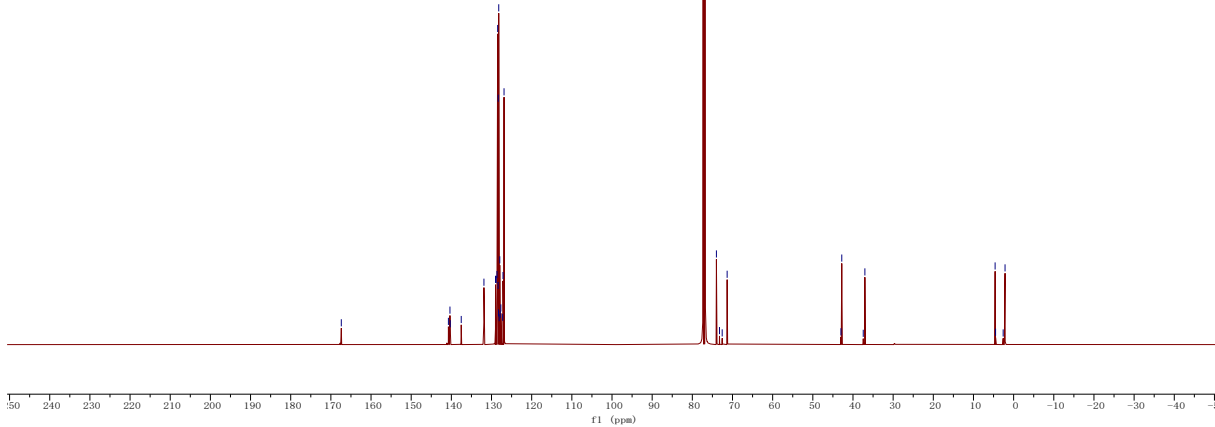

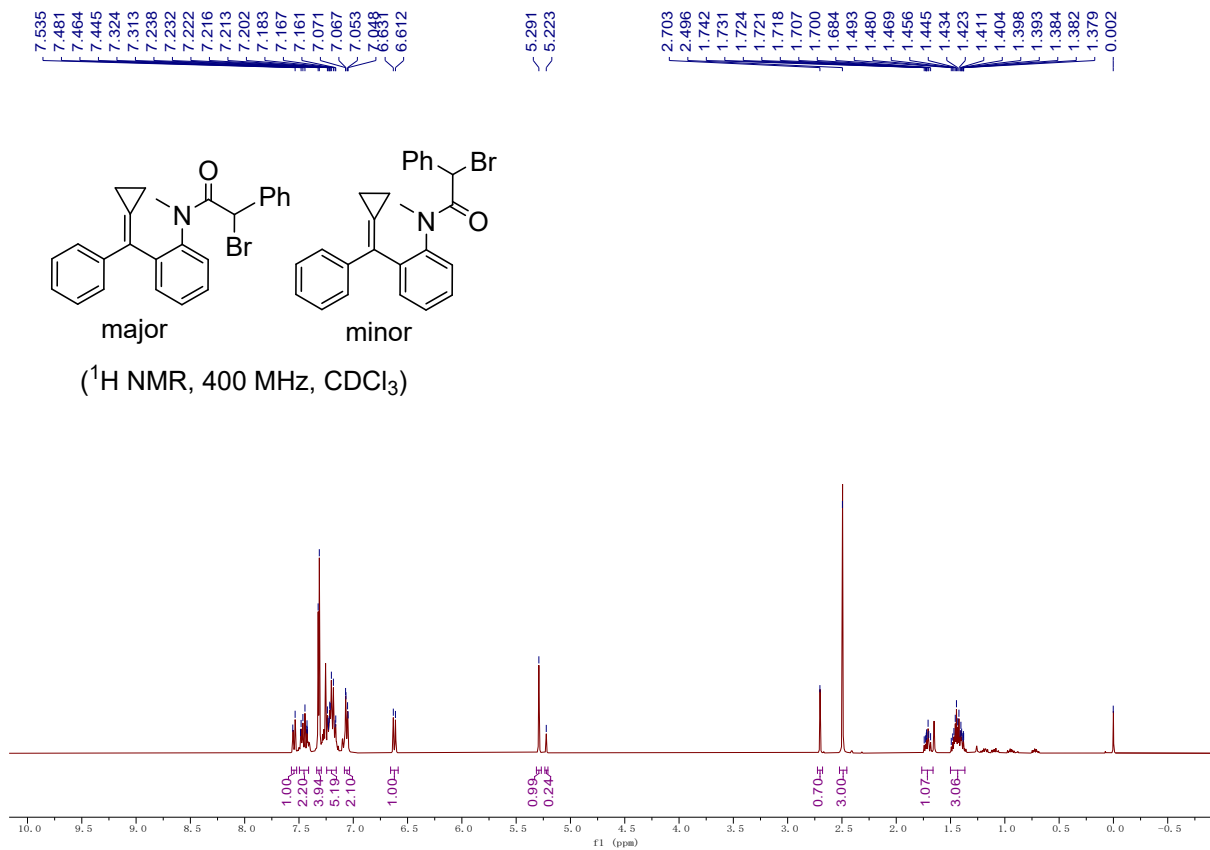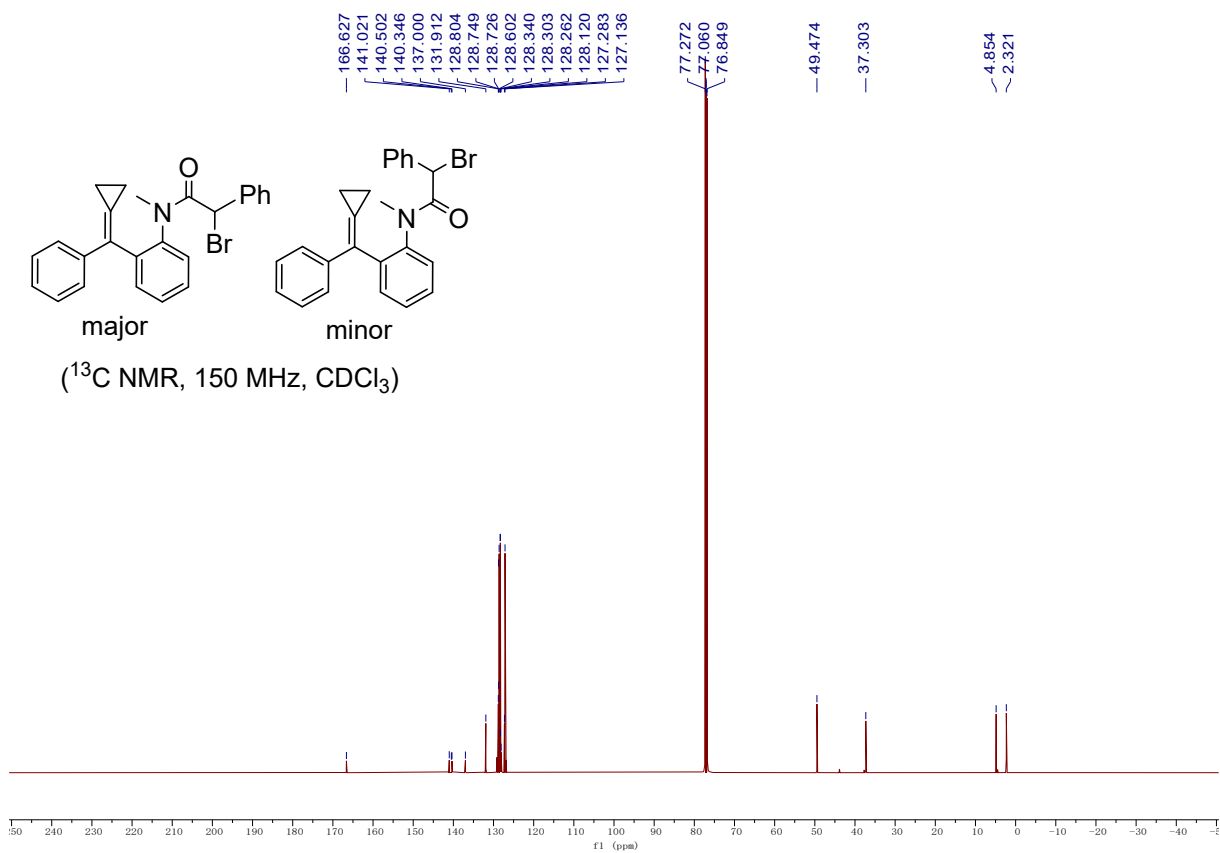

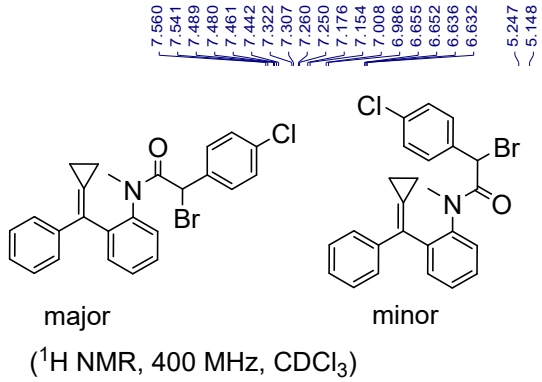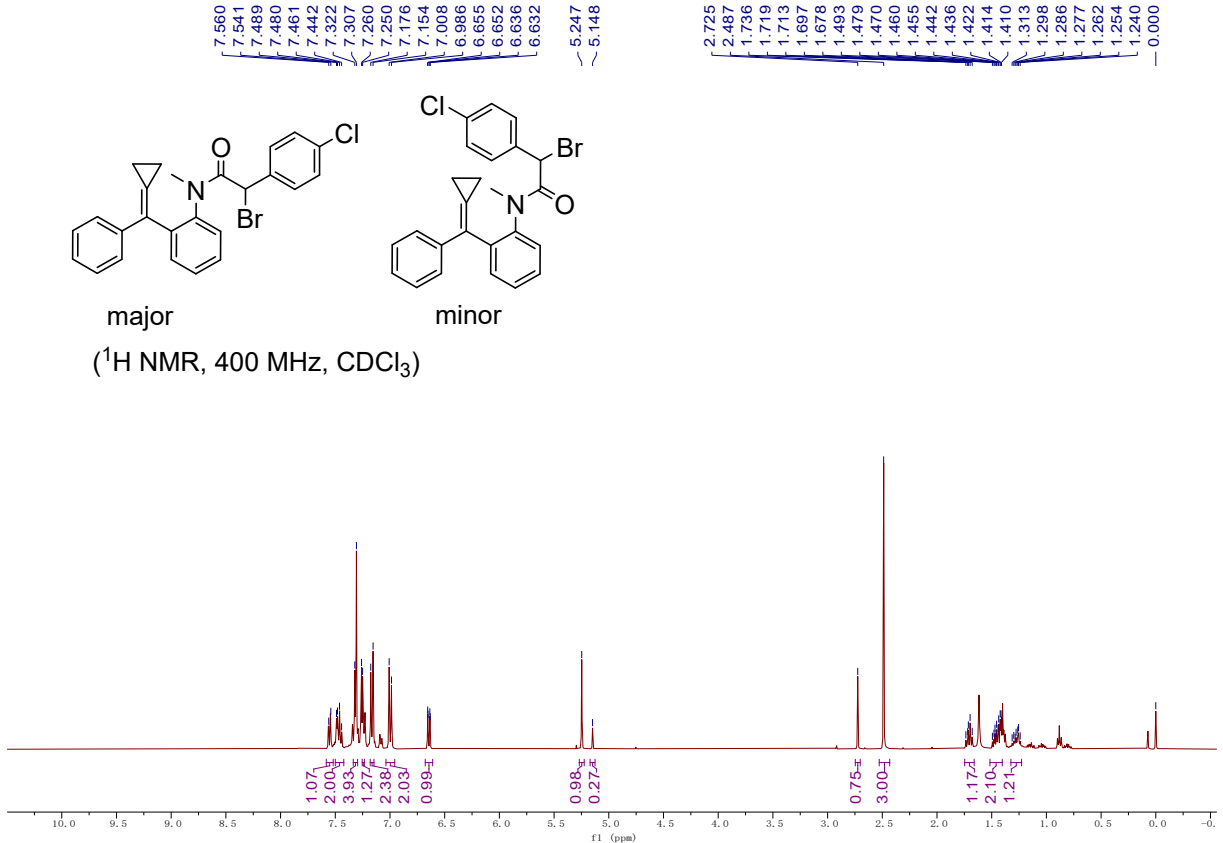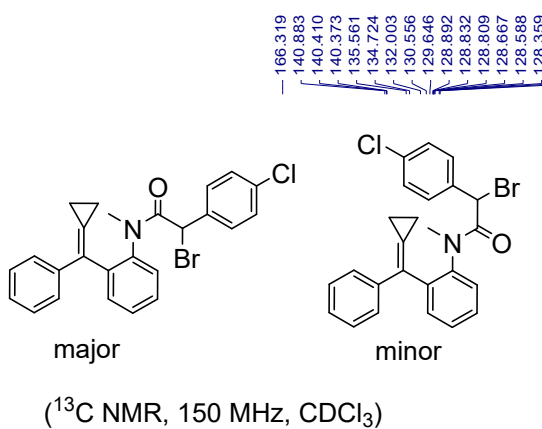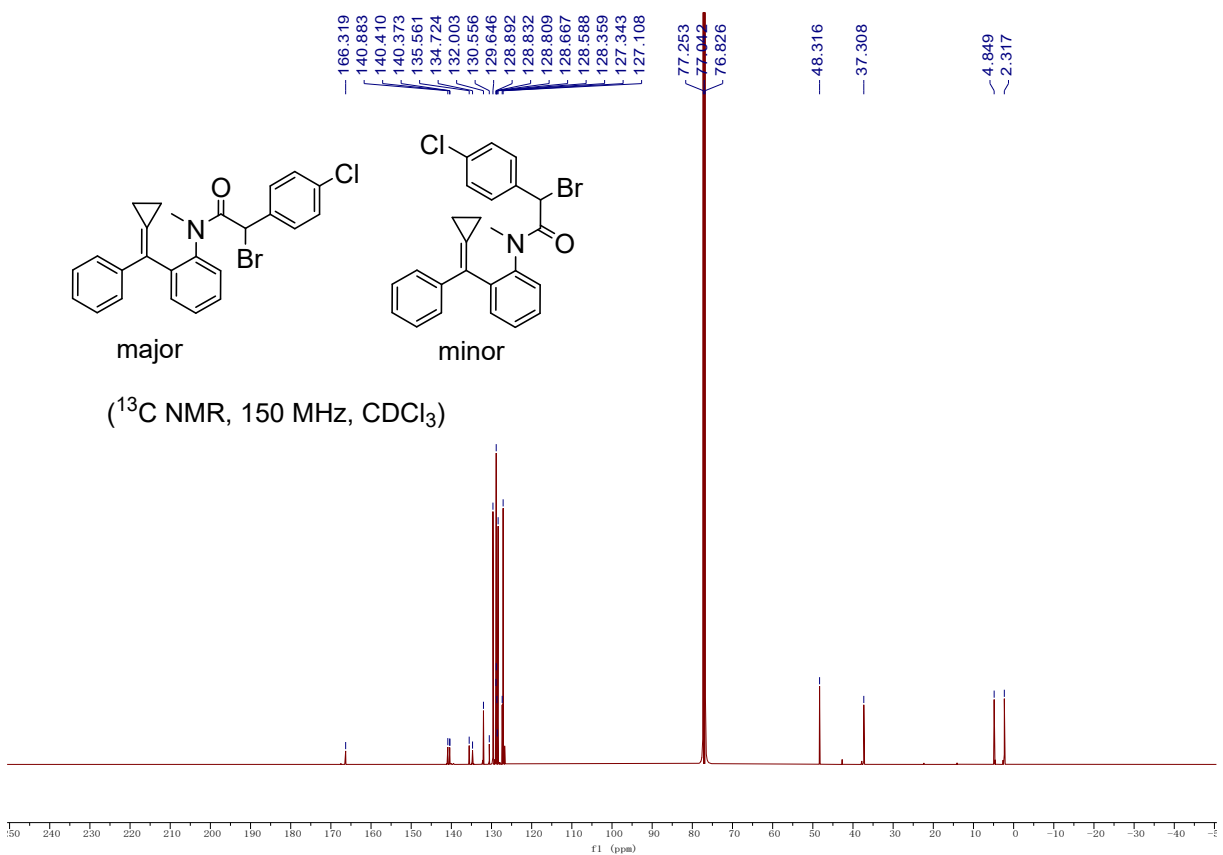

7.527  
7.513  
7.508  
7.458  
7.452  
7.445  
7.441  
7.436  
7.422  
7.418  
7.414  
7.408  
7.395  
7.390  
7.380  
7.376  
7.370  
7.300  
7.294  
7.288  
7.280  
7.262  
7.235  
7.230  
7.215  
7.209  
7.198  
7.193  
7.099  
7.095  
7.080  
7.076  
3.948  
3.930  
3.566  
3.543  
2.604  
2.485  
1.971  
1.954  
1.516  
1.433  
1.420  
1.402  
1.385  
1.371  
1.363  
1.350  
1.342  
1.333  
1.322  
1.250  
1.242  
1.165  
1.147  
1.130  
0.959  
0.942  
0.927  
0.911  
0.766  
0.750  
0.701  
0.684  
0.000

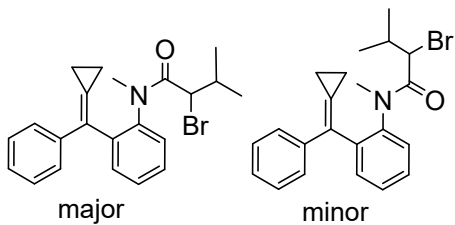

(<sup>1</sup>H NMR, 400 MHz, CDCl<sub>3</sub>)

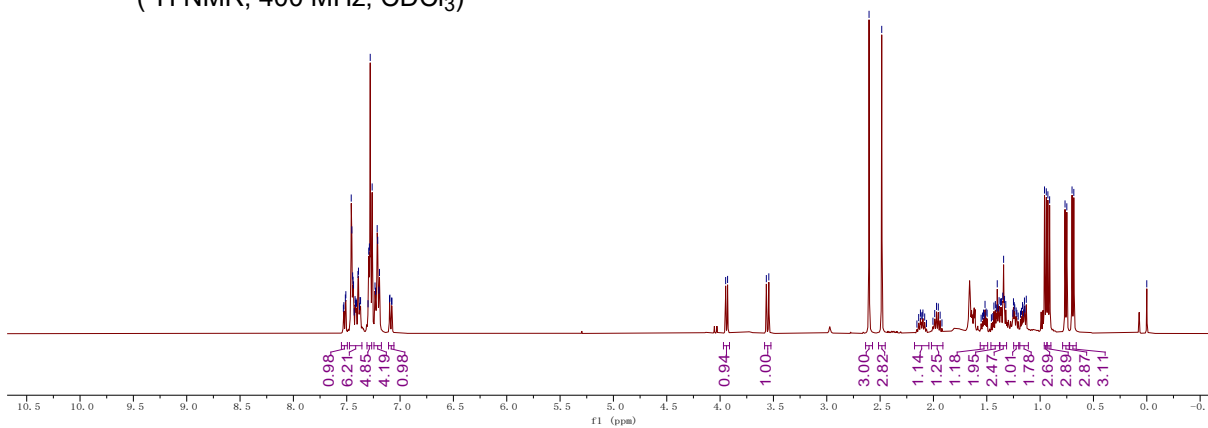

166.925  
166.626  
141.315  
141.044  
140.690  
140.405  
139.918  
132.141  
132.003  
129.609  
129.177  
129.030  
128.887  
128.731  
128.648  
128.570  
128.529  
128.317  
128.175  
127.292  
127.269  
127.081  
127.007  
126.860

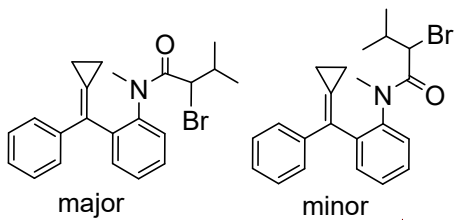

(<sup>13</sup>C NMR, 600 MHz, CDCl<sub>3</sub>)

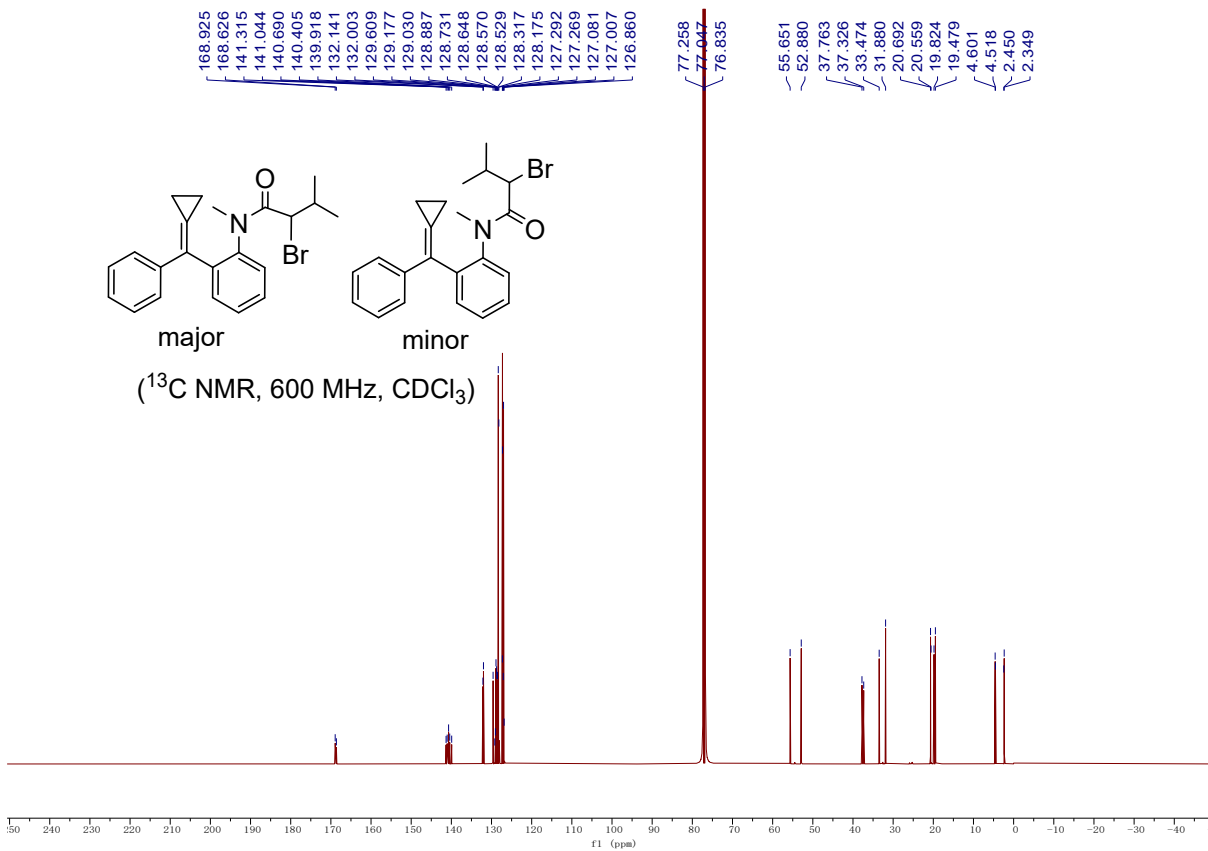



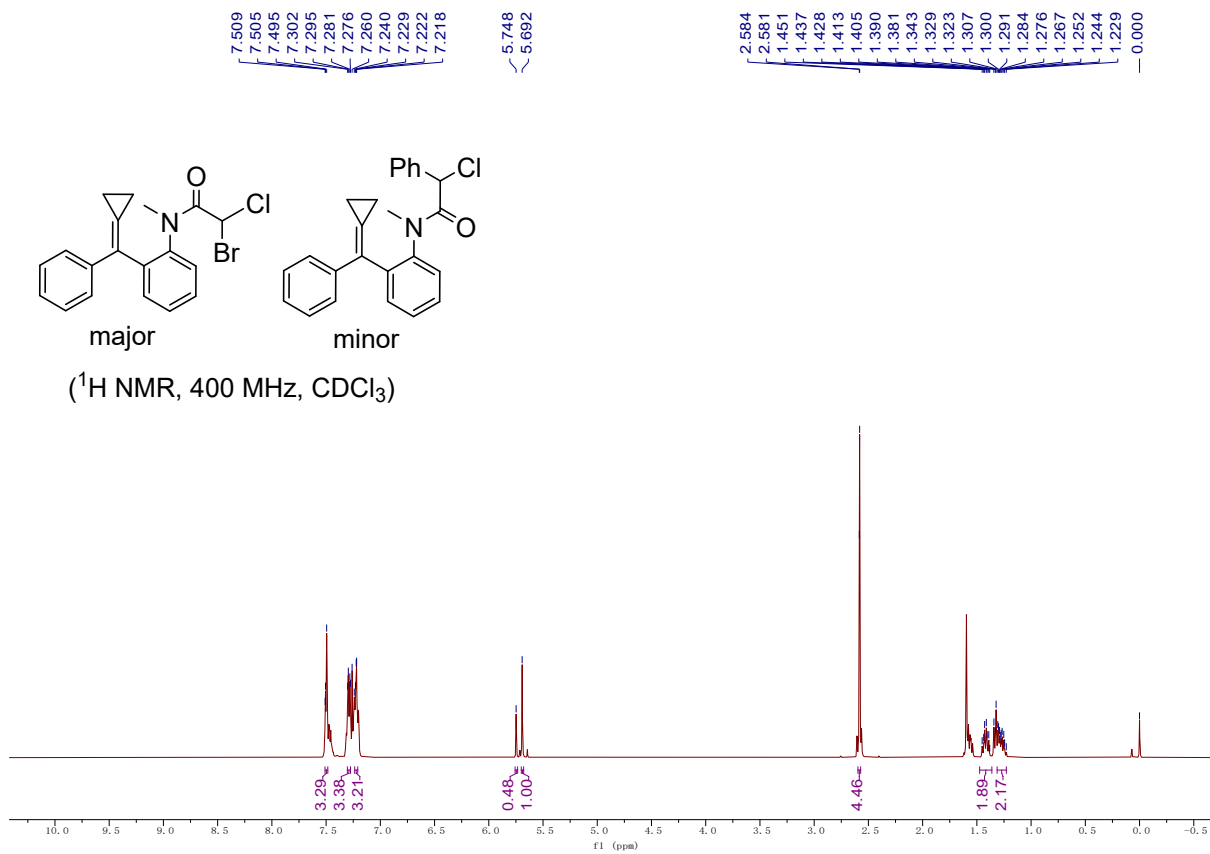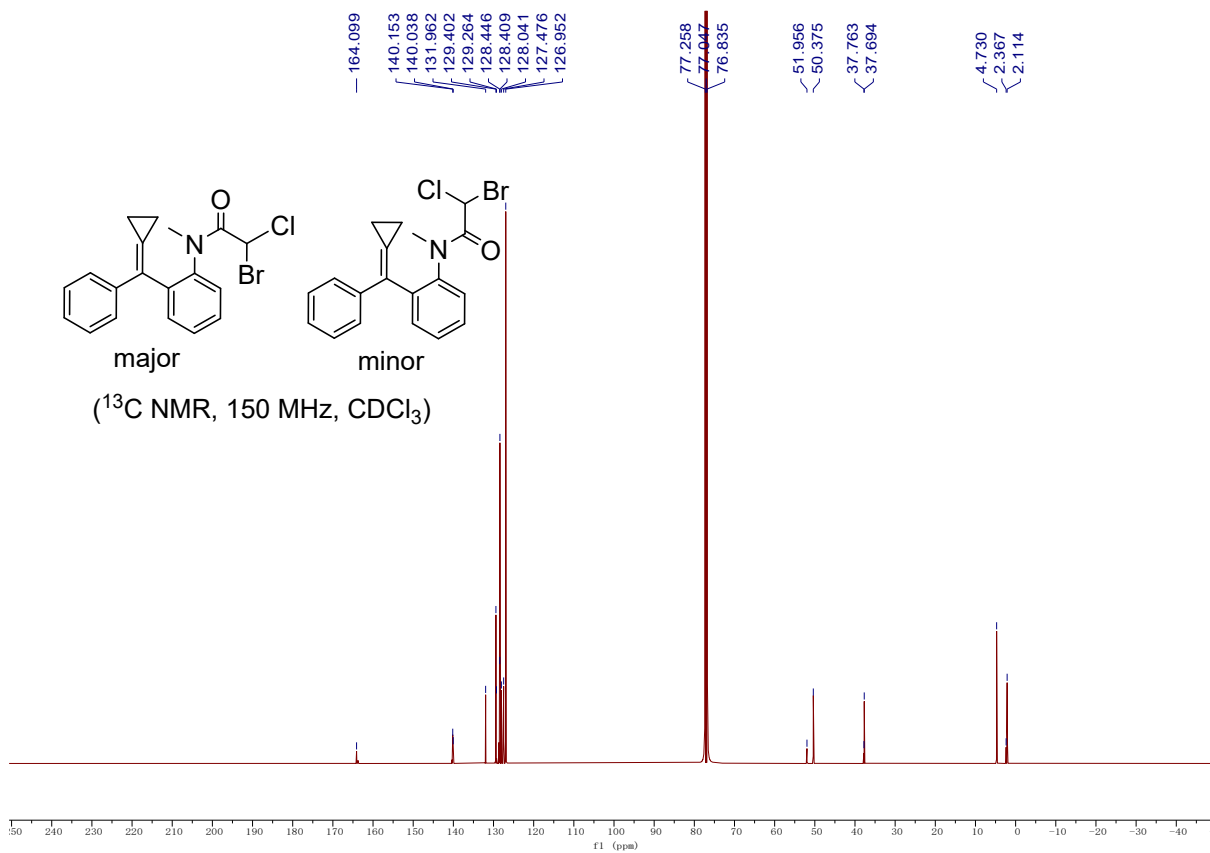

# 11. Spectroscopic Data of Products (NMR Spectrum)

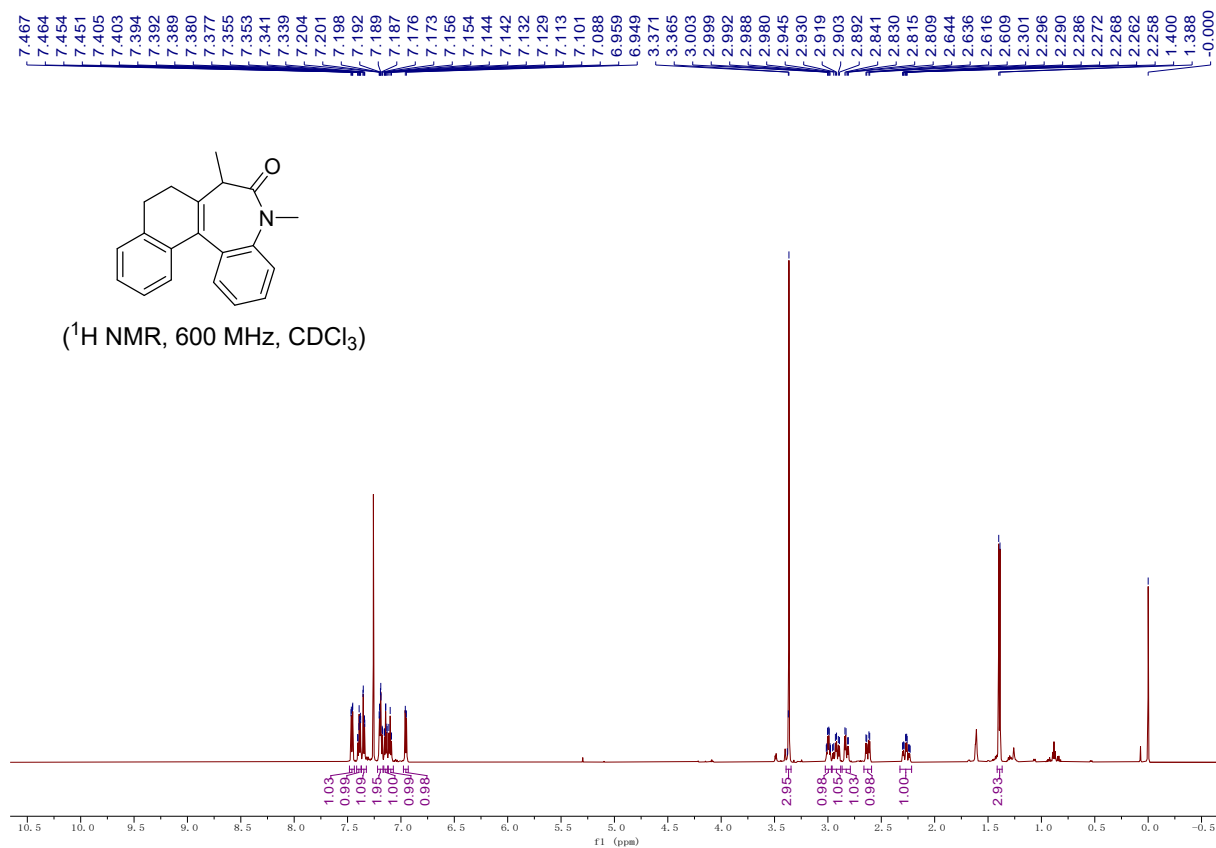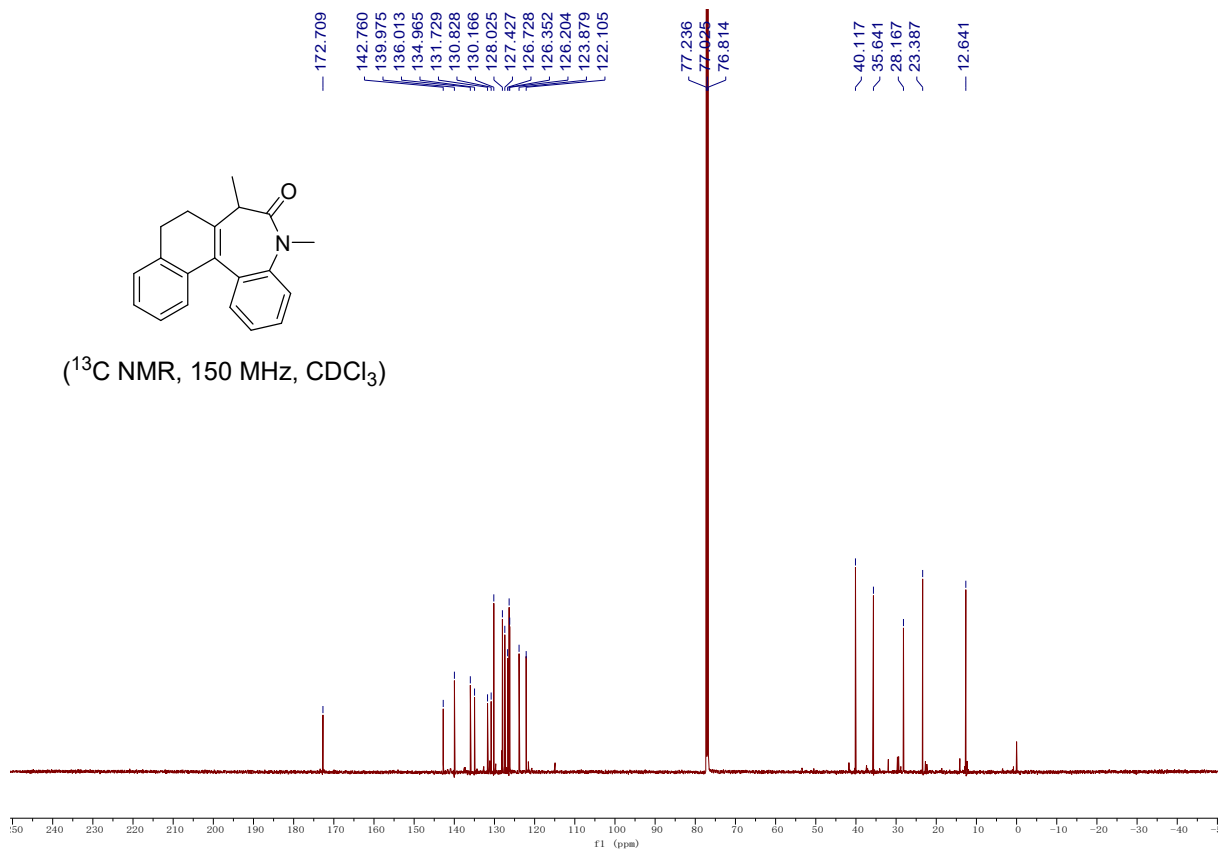

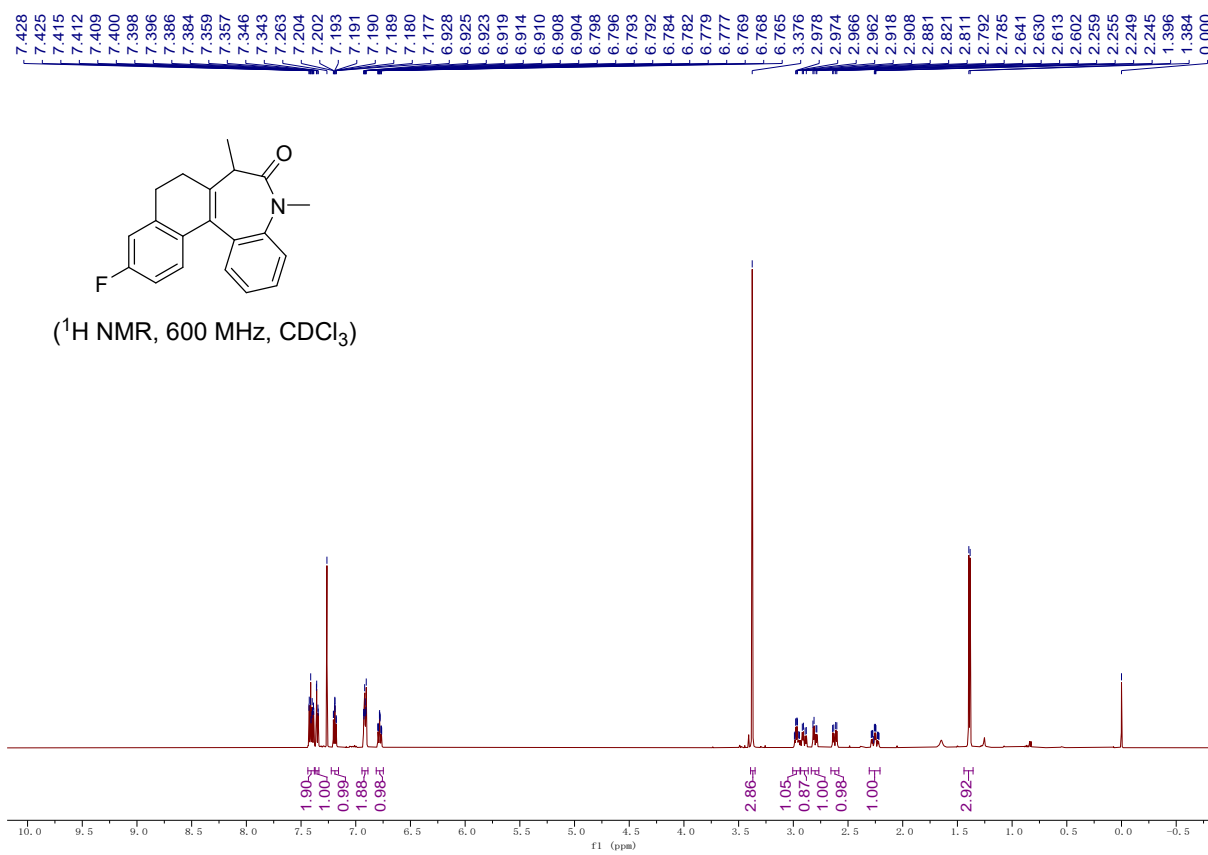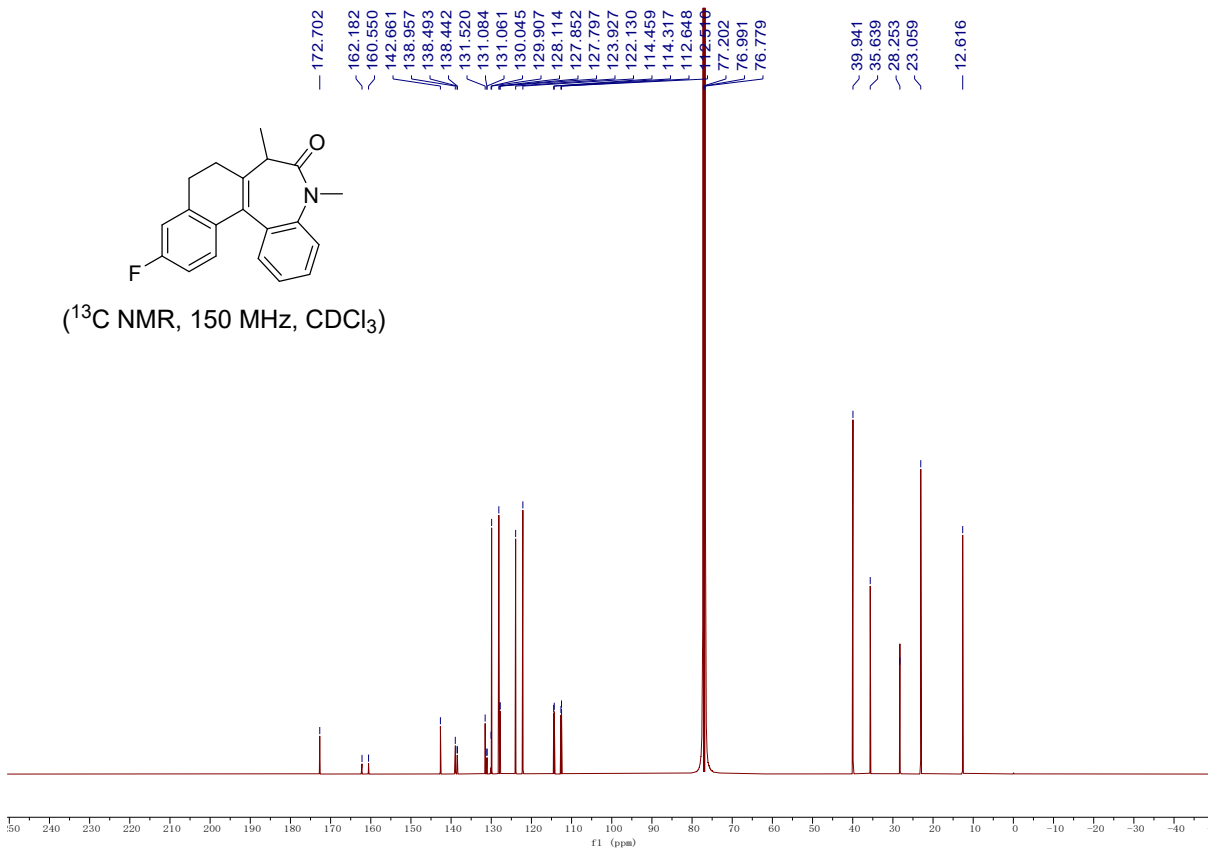

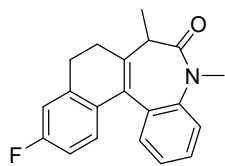

(<sup>19</sup>F NMR, 564 MHz, CDCl<sub>3</sub>)

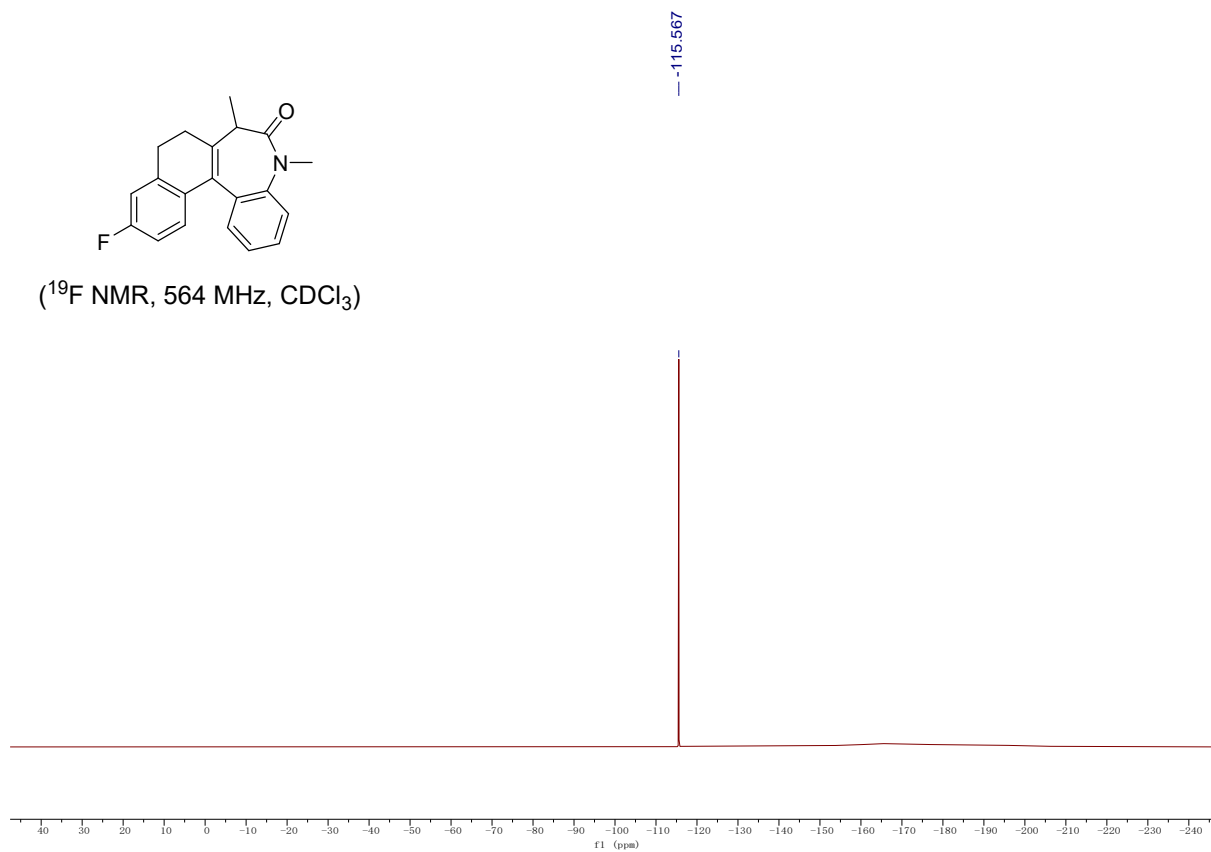

7.424  
7.420  
7.415  
7.410  
7.403  
7.399  
7.395  
7.391  
7.385  
7.381  
7.377  
7.363  
7.360  
7.342  
7.338  
7.211  
7.207  
7.194  
7.187  
7.182  
7.179  
7.174  
7.170  
7.075  
7.069  
7.056  
7.050  
7.037  
6.890  
6.869  
3.373  
3.002  
2.991  
2.985  
2.973  
2.967  
2.950  
2.907  
2.892  
2.869  
2.853  
2.817  
2.806  
2.784  
2.768  
2.657  
2.639  
2.613  
2.597  
2.501  
2.295  
2.285  
2.279  
2.259  
2.253  
2.243  
2.237  
1.397  
1.380  
1.072  
1.053  
0.551  
0.547  
0.000

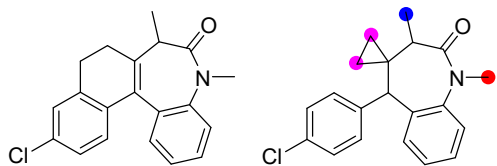

Speculated by-product

(<sup>1</sup>H NMR, 400 MHz, CDCl<sub>3</sub>)

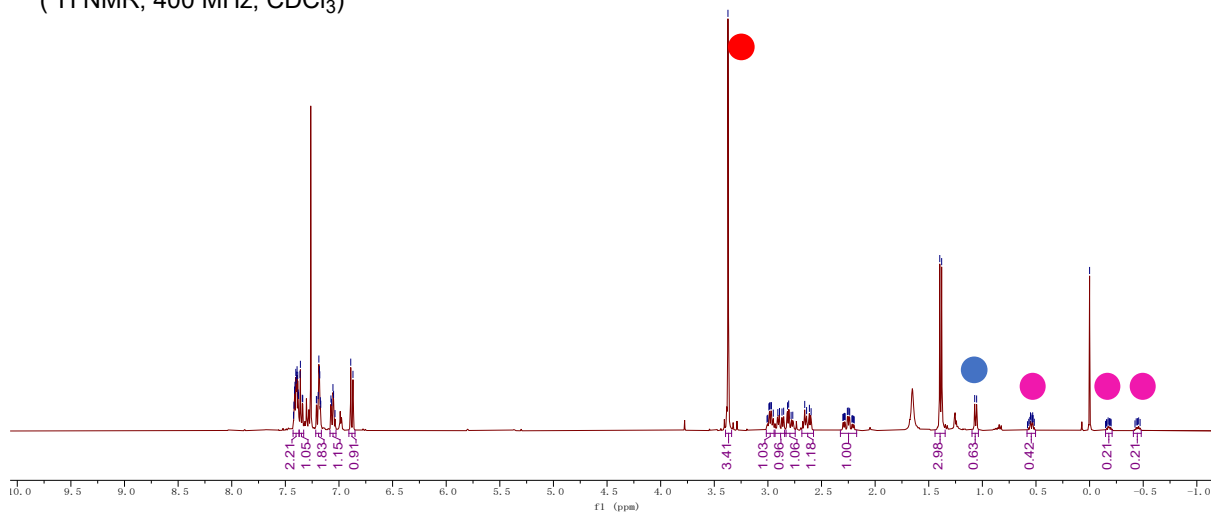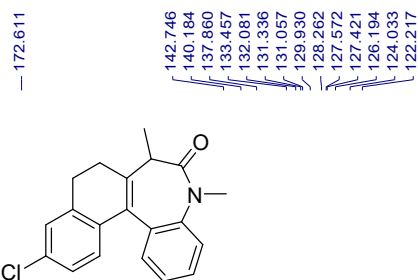

(<sup>13</sup>C NMR, 150 MHz, CDCl<sub>3</sub>)

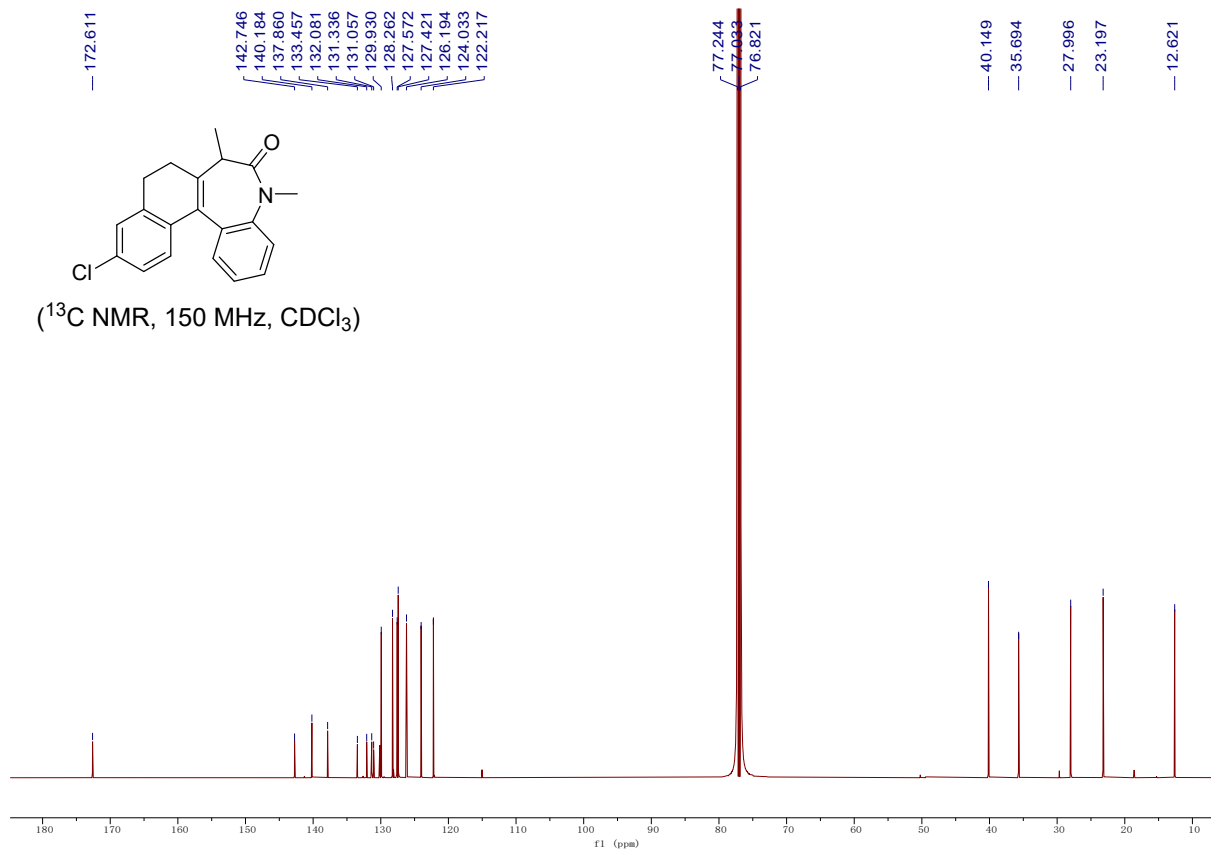

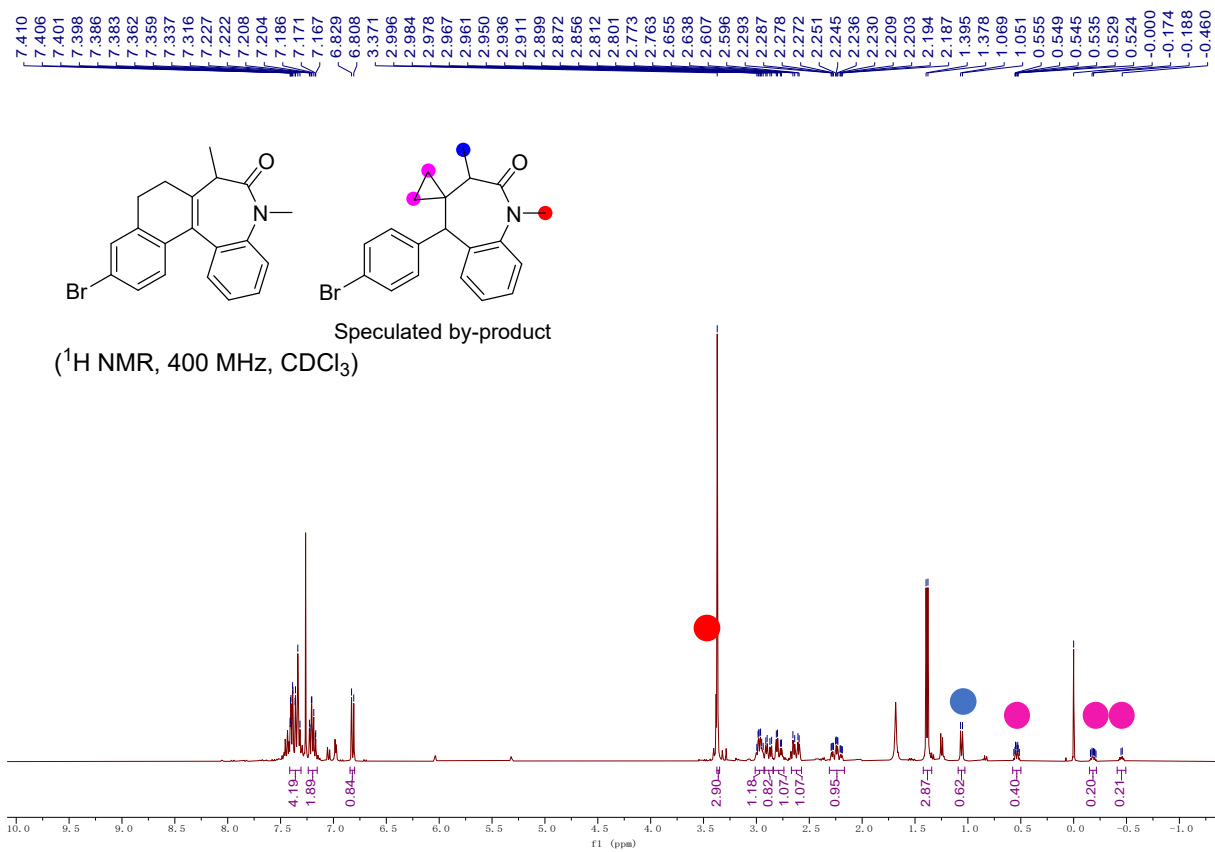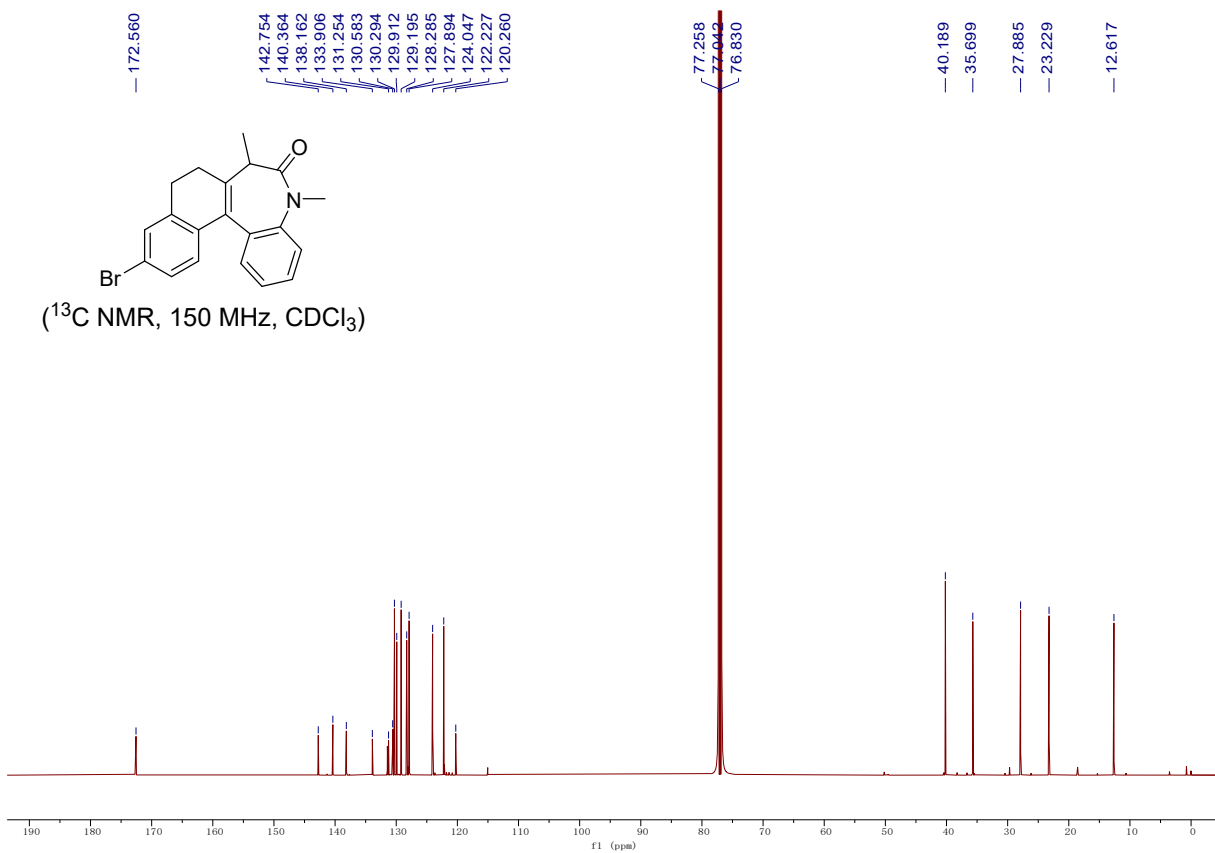

7.461  
7.446  
7.381  
7.364  
7.360  
7.349  
7.345  
7.198  
7.194  
7.181  
7.178  
7.162  
7.157  
7.150  
6.900  
6.879  
6.773  
6.769  
6.764  
6.648  
6.641  
6.626  
6.620  
3.819  
3.802  
3.381  
3.363  
2.965  
2.948  
2.925  
2.909  
2.884  
2.869  
2.811  
2.796  
2.768  
2.757  
2.633  
2.617  
2.591  
2.576  
2.298  
2.292  
2.283  
2.277  
2.256  
2.250  
2.241  
2.235  
2.214  
2.208  
2.199  
2.193  
1.390  
1.372  
1.088  
1.070  
0.537  
0.531  
0.518  
0.510  
0.497  
-0.000  
-0.169  
-0.454

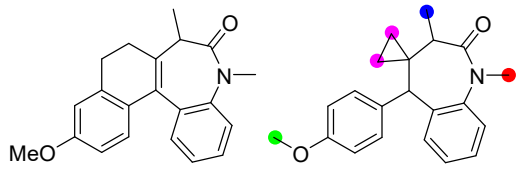

(<sup>1</sup>H NMR, 400 MHz, CDCl<sub>3</sub>)

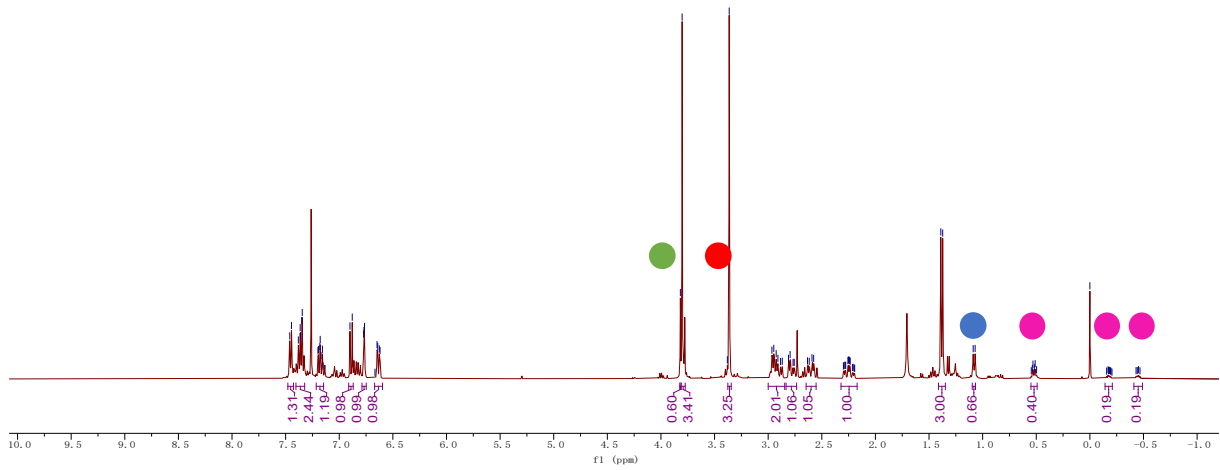

172.887  
158.395  
142.717  
137.854  
137.386  
131.934  
130.726  
130.413  
130.114  
127.936  
127.527  
123.845  
122.122  
113.412  
110.994  
77.253  
77.042  
76.830  
55.316  
39.891  
35.662  
28.681  
23.294  
12.658

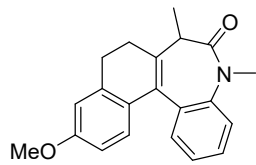

(<sup>13</sup>C NMR, 150 MHz, CDCl<sub>3</sub>)

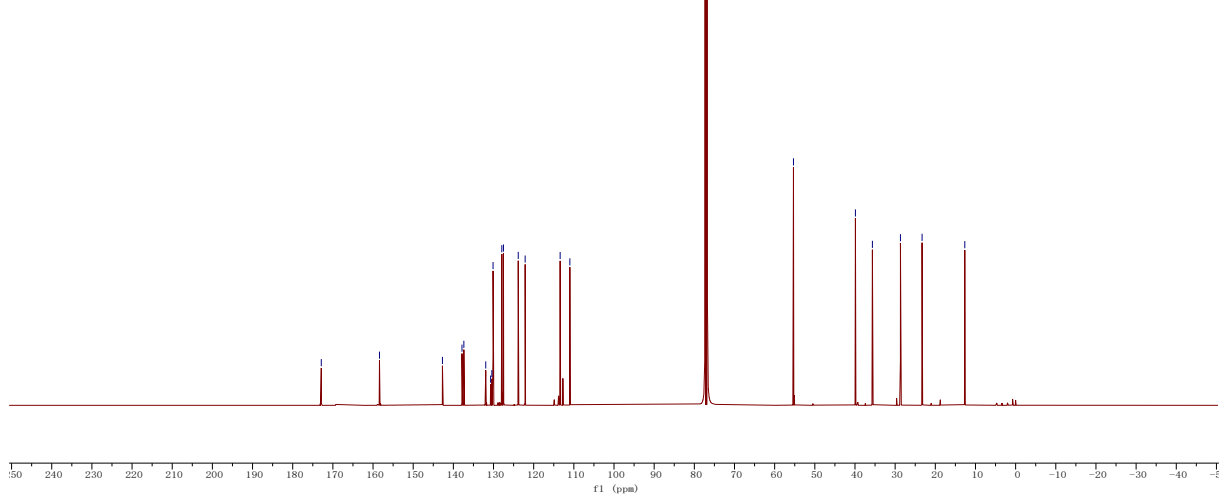

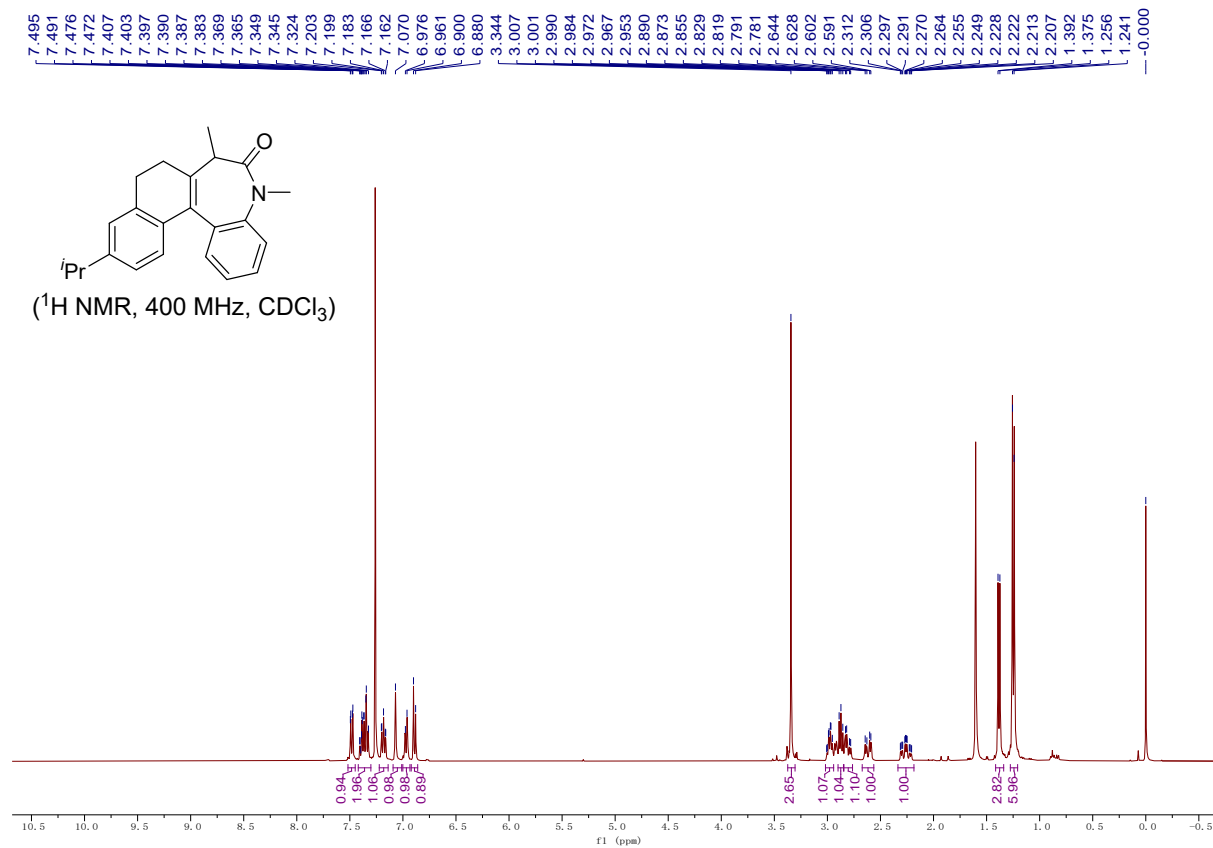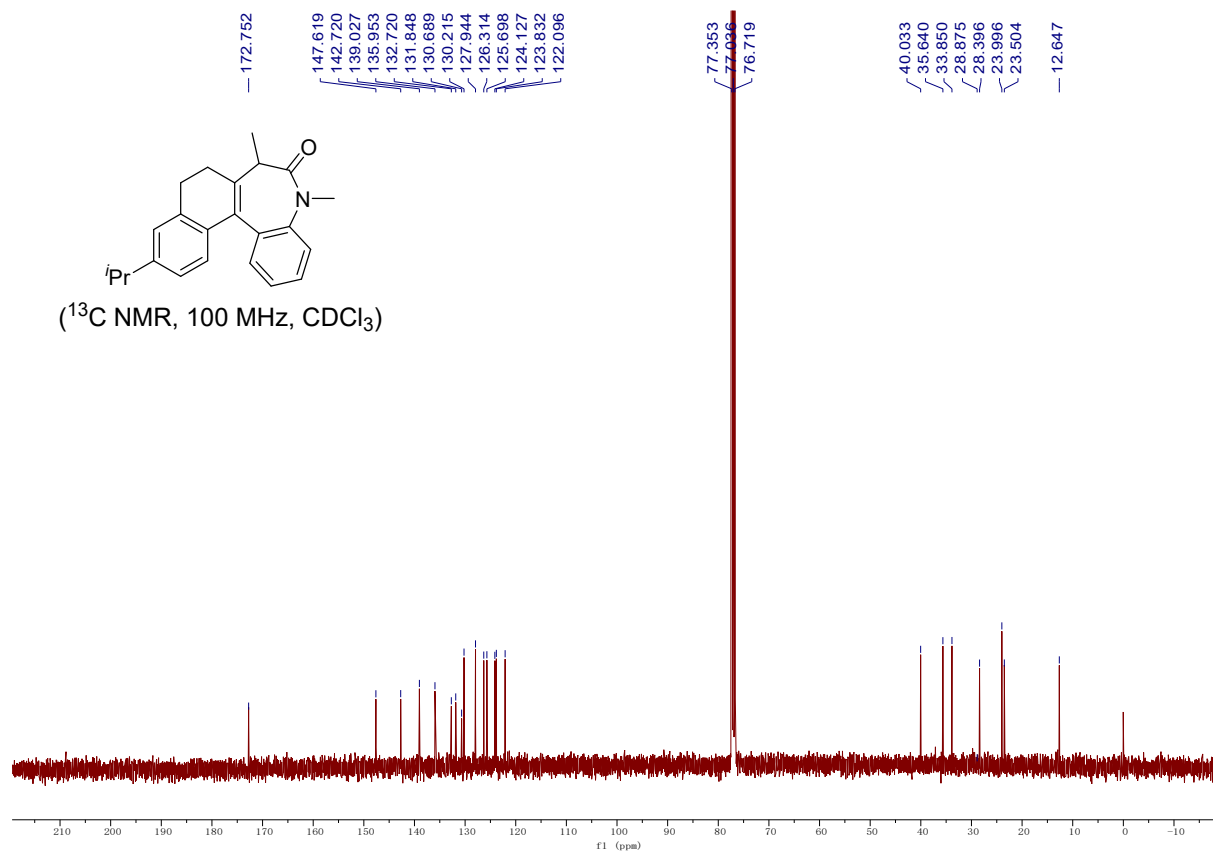



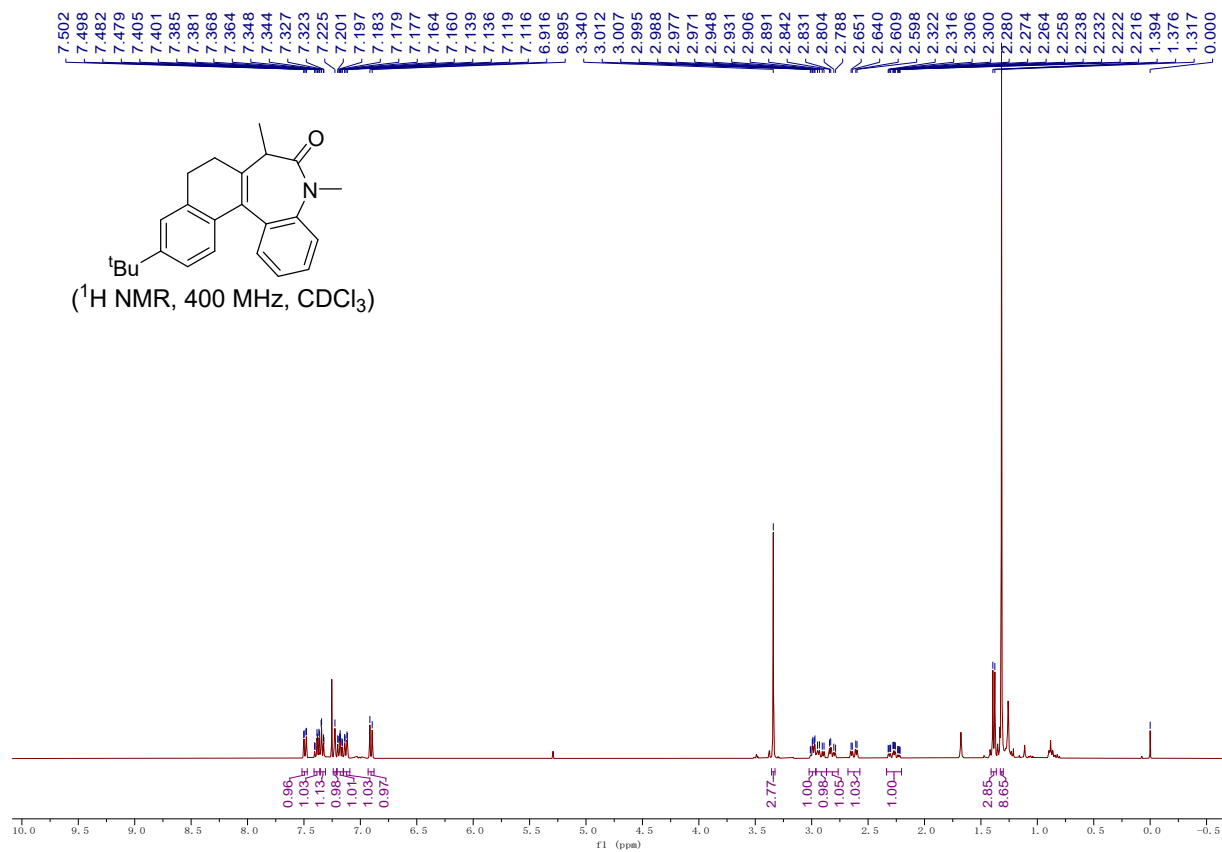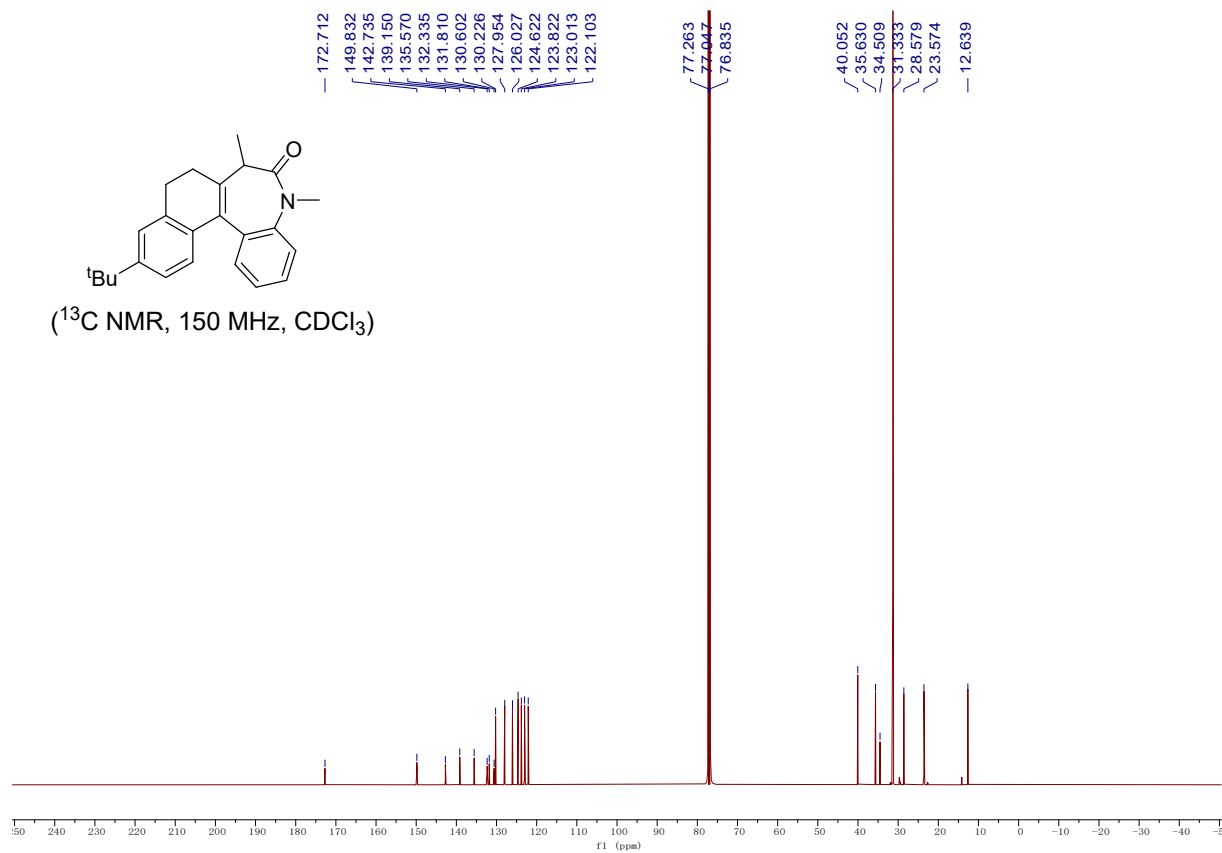

7.591, 7.443, 7.427, 7.423, 7.414, 7.410, 7.406, 7.394, 7.379, 7.358, 7.333, 7.229, 7.225, 7.212, 7.209, 7.205, 7.192, 7.188, 7.059, 7.039, 3.380, 3.054, 3.040, 3.034, 3.022, 3.016, 3.005, 2.967, 2.952, 2.925, 2.918, 2.913, 2.907, 2.901, 2.886, 2.880, 2.868, 2.715, 2.709, 2.698, 2.680, 2.672, 2.667, 2.657, 2.651, 2.341, 2.334, 2.323, 2.317, 2.300, 2.294, 2.282, 2.276, 2.252, 1.416, 1.399, 1.068, 1.049, 0.571, 0.558, 0.000, -0.149, -0.163, -0.446

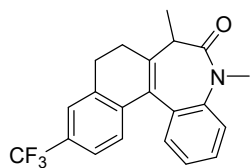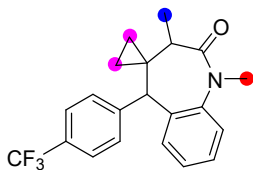

Speculated by-product

(<sup>1</sup>H NMR, 400 MHz, CDCl<sub>3</sub>)

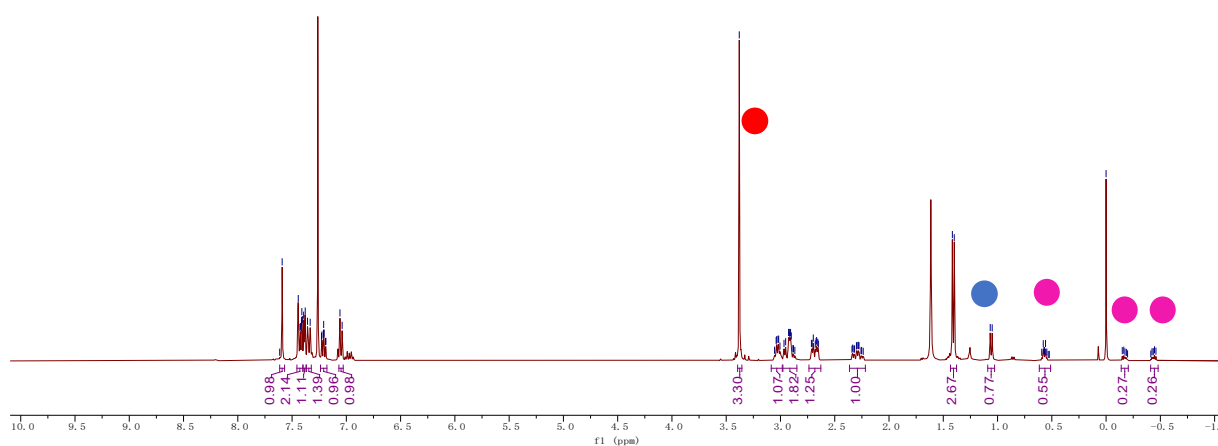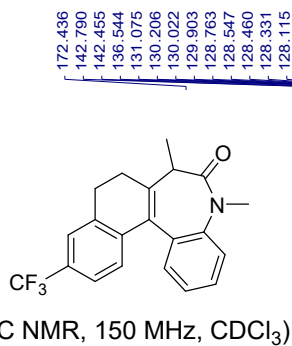

(<sup>13</sup>C NMR, 150 MHz, CDCl<sub>3</sub>)

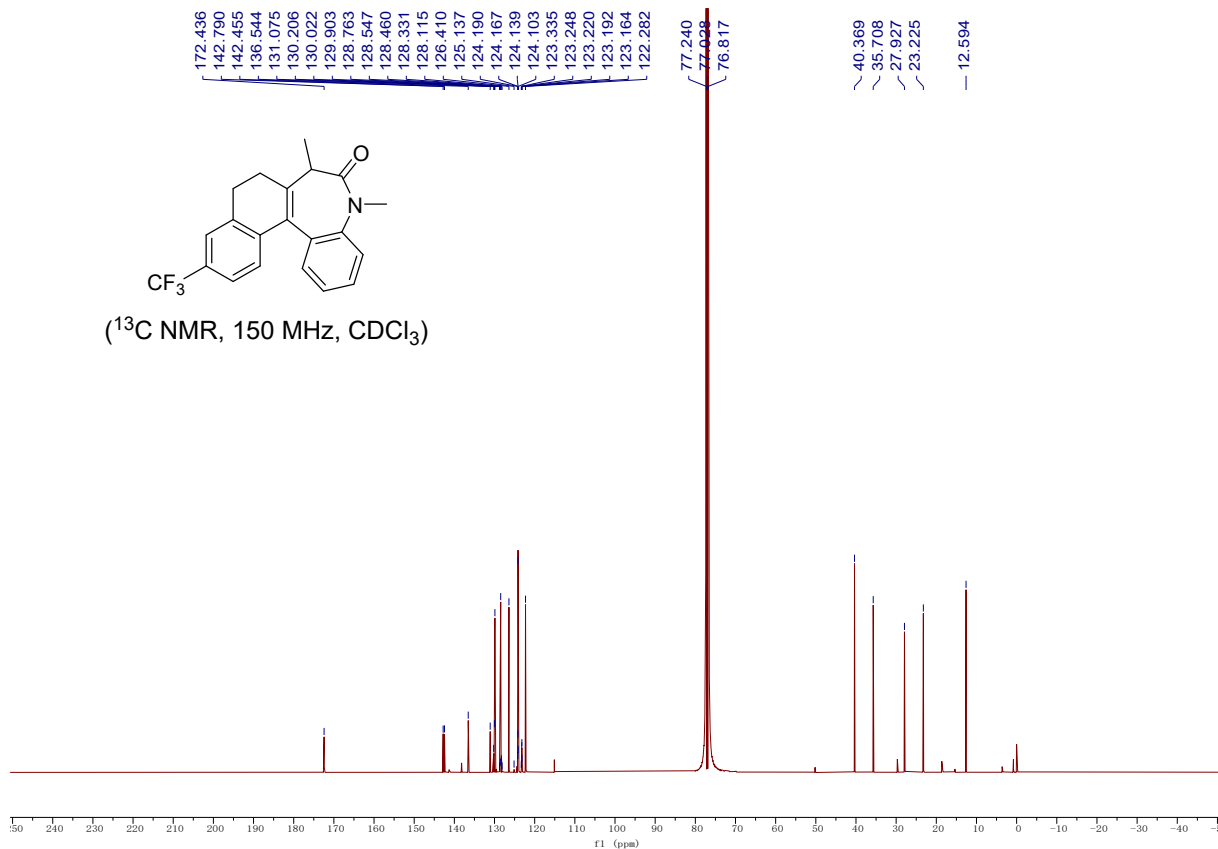

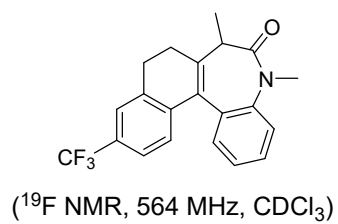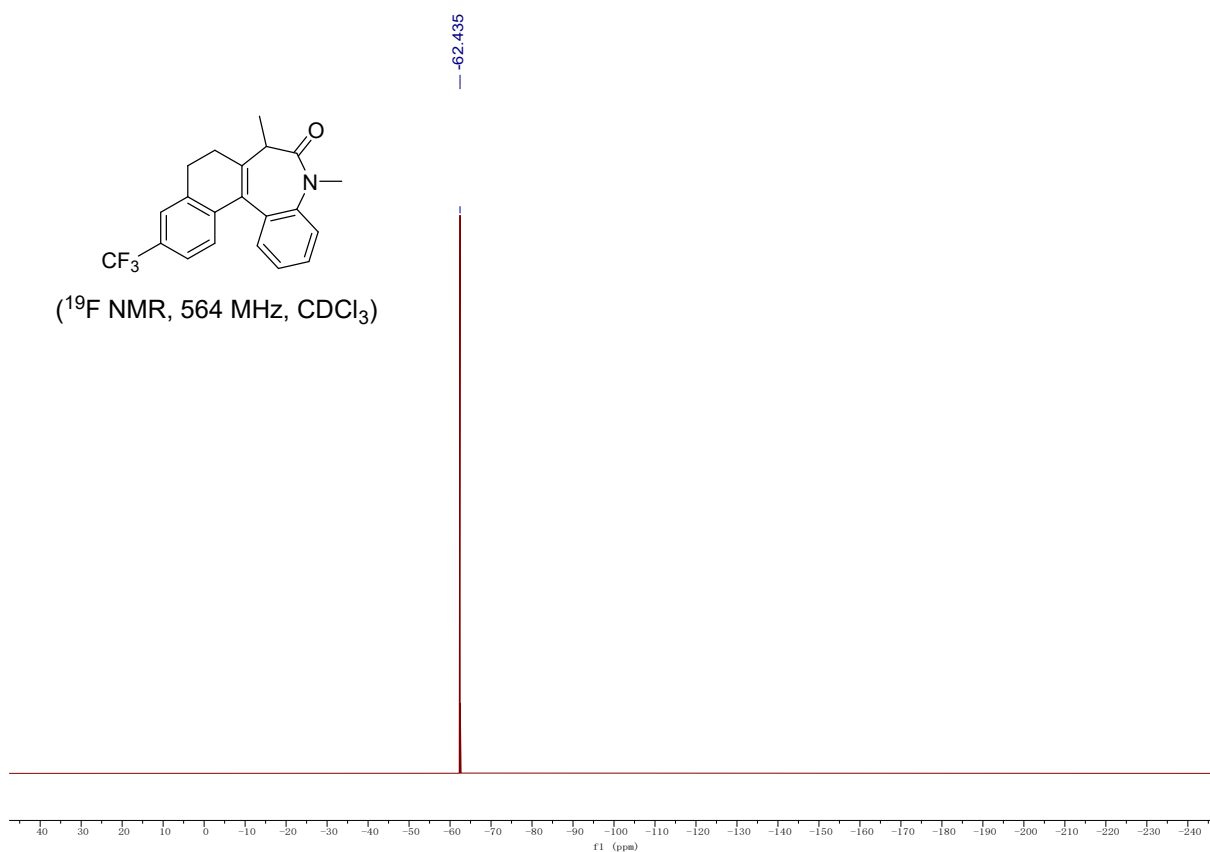

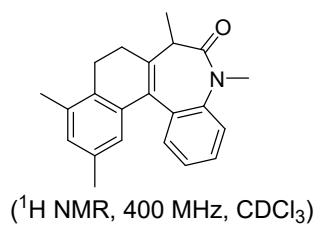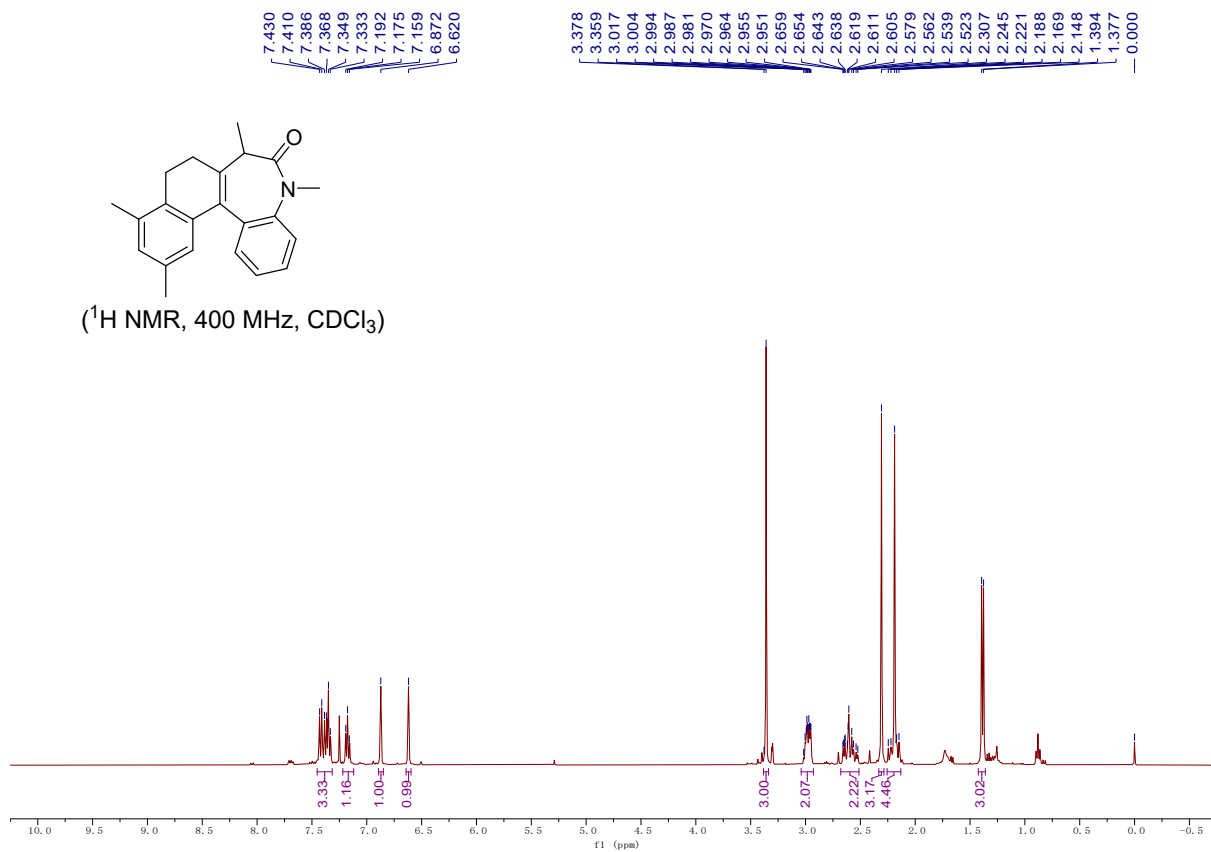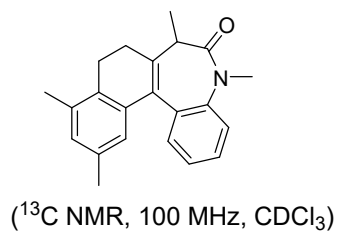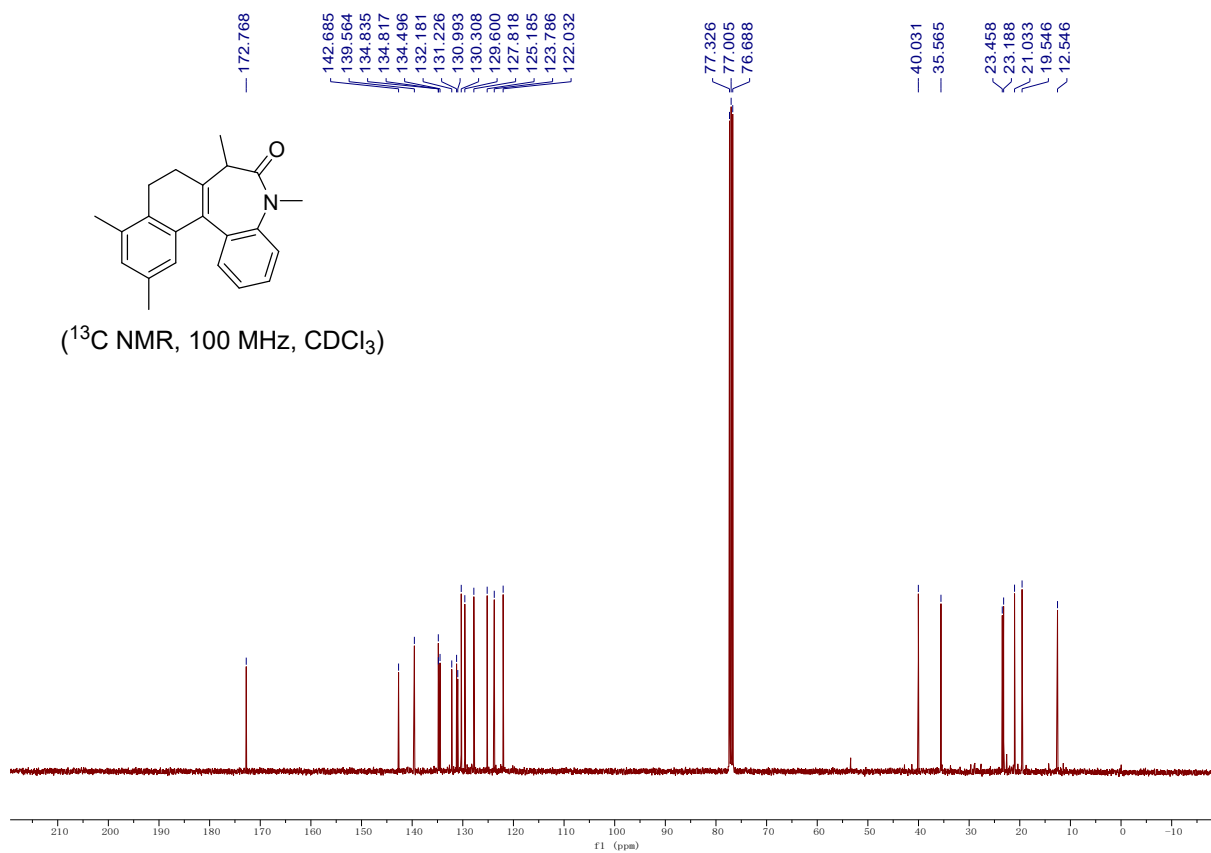

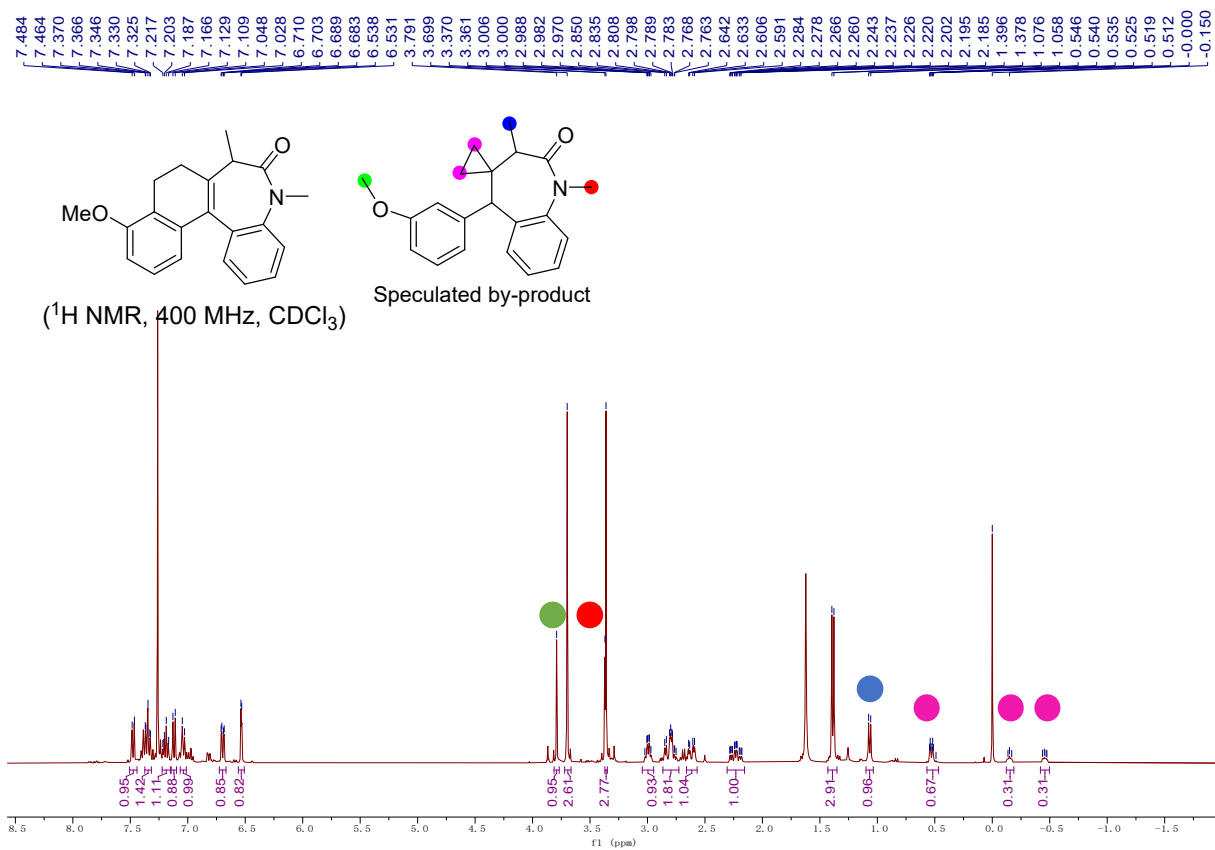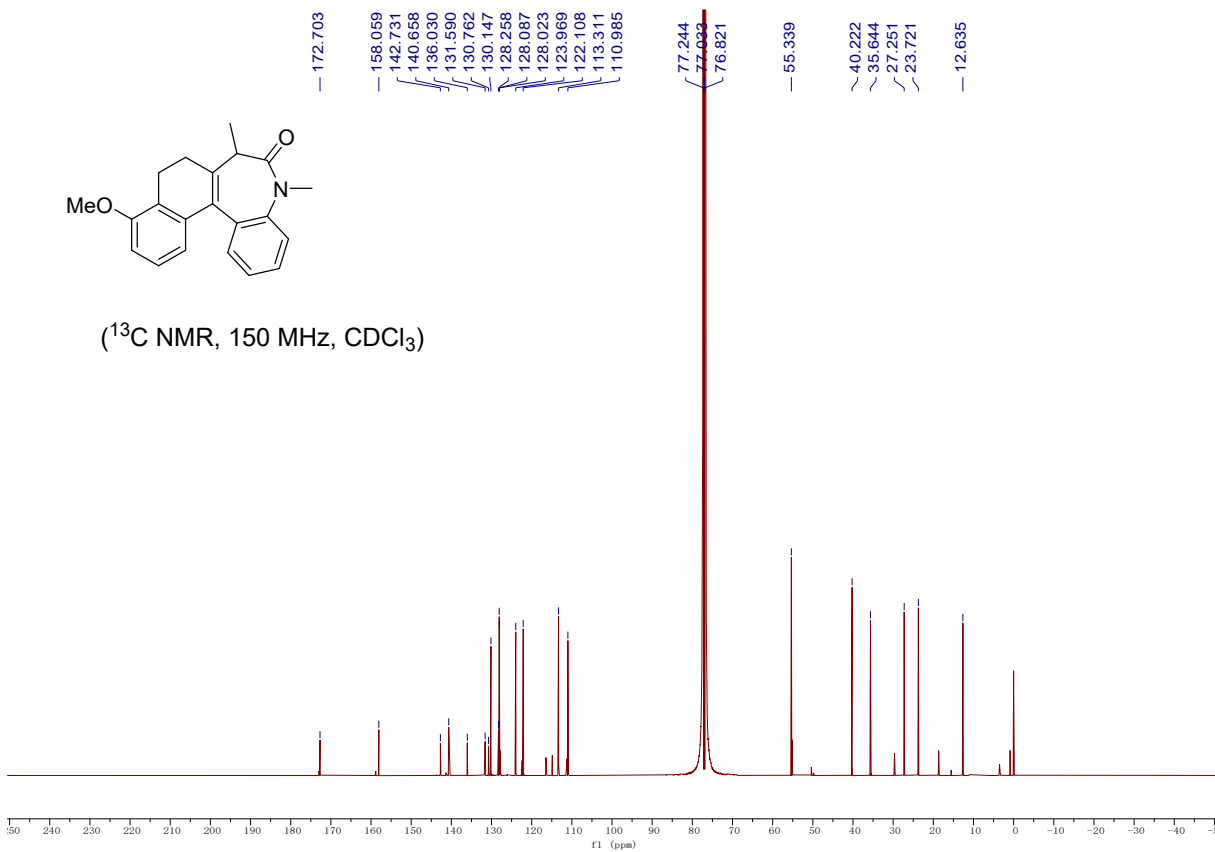

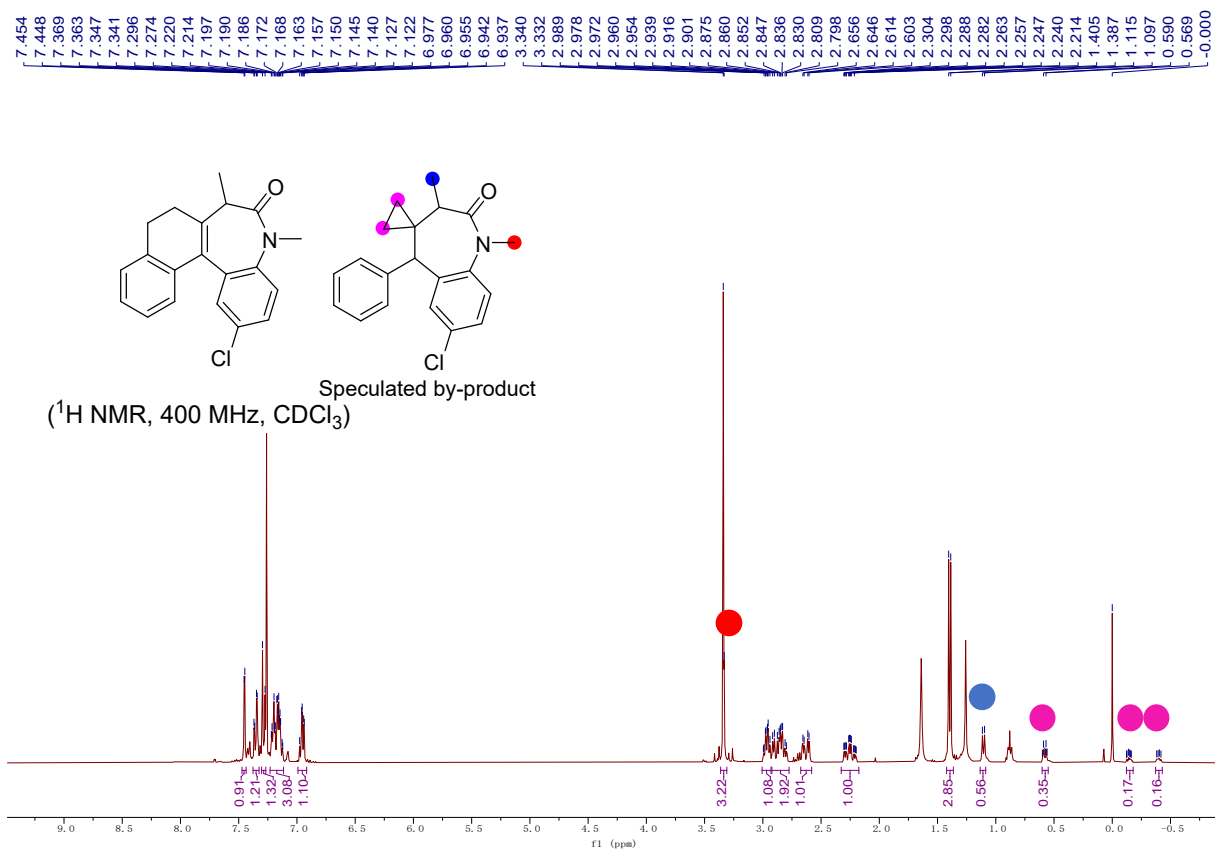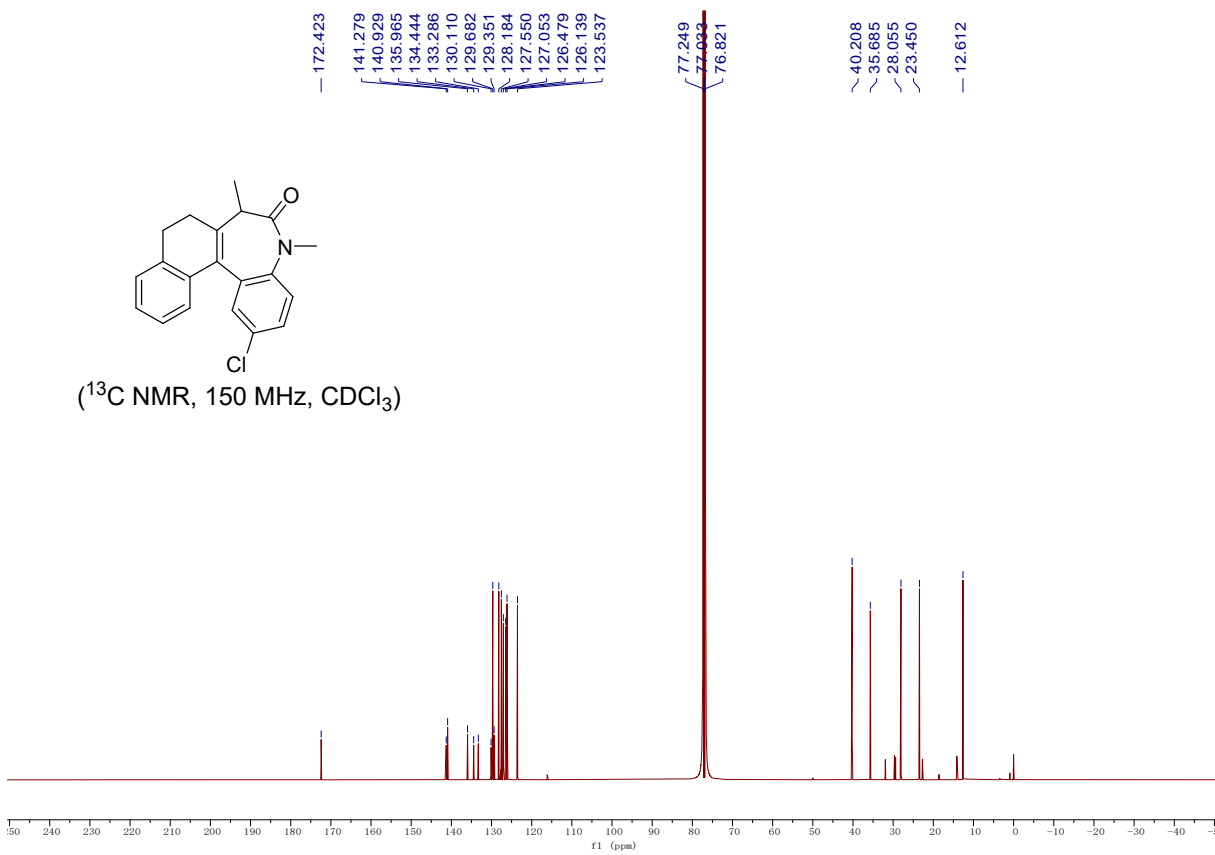

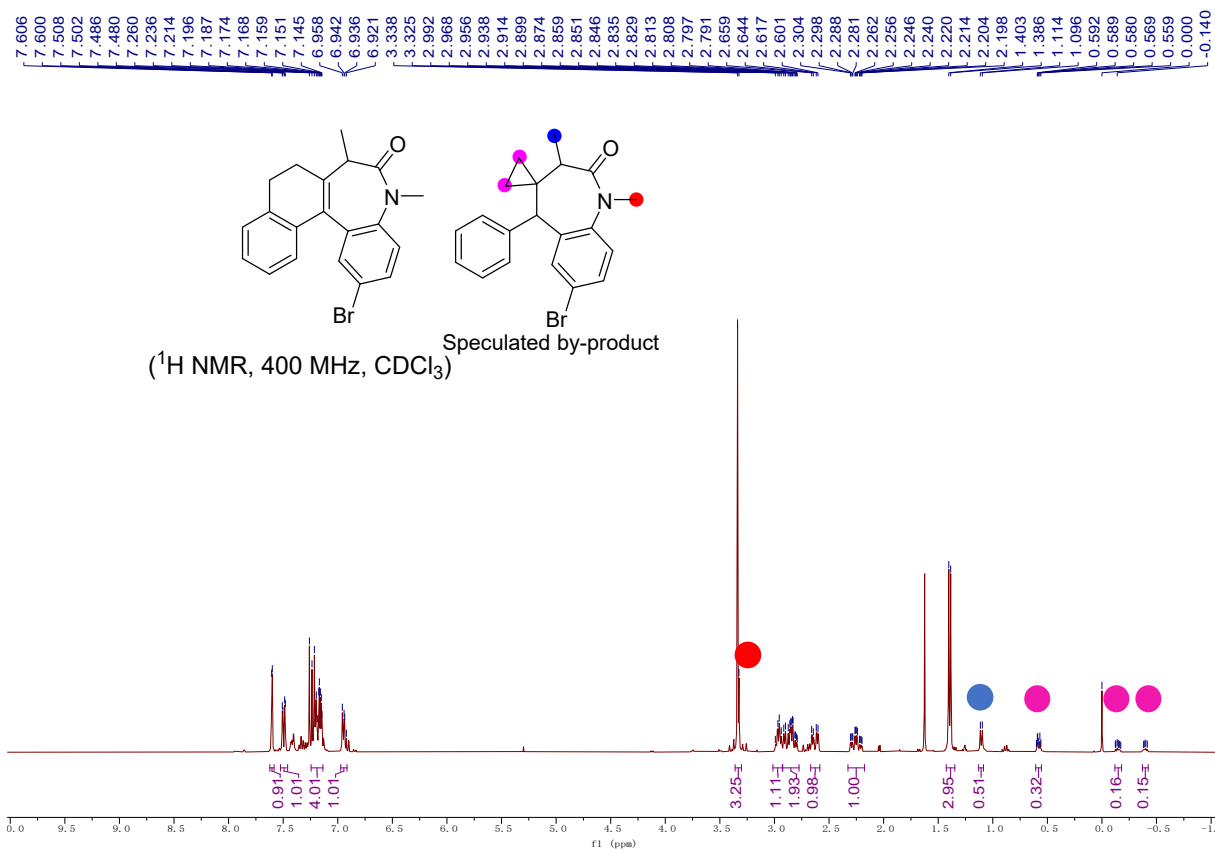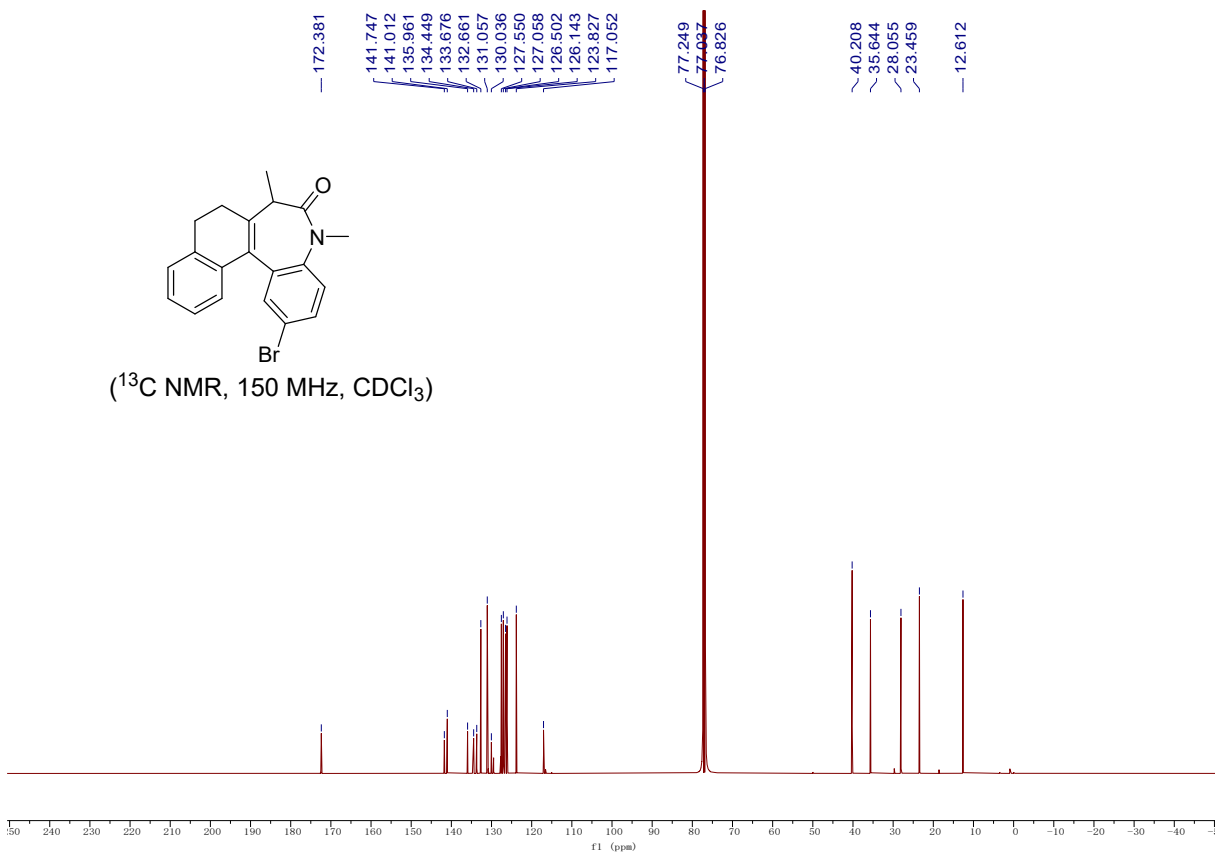

7.273  
7.272  
7.260  
7.252  
7.250  
7.210  
7.193  
7.168  
7.164  
7.150  
7.146  
7.137  
7.134  
7.129  
7.118  
7.116  
7.114  
7.112  
7.100  
7.088  
7.085  
7.094  
7.054  
7.050  
7.036  
7.031  
6.980  
6.973  
6.959  
6.951  
6.947  
6.940  
3.771  
3.320  
3.048  
3.042  
3.030  
3.024  
2.928  
2.913  
2.887  
2.872  
2.848  
2.844  
2.833  
2.828  
2.810  
2.805  
2.795  
2.651  
2.646  
2.635  
2.630  
2.609  
2.604  
2.593  
2.589  
2.587  
2.288  
2.262  
2.256  
2.246  
2.240  
1.393  
1.376

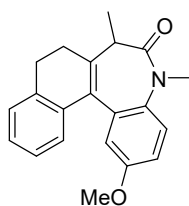

$^1\text{H NMR}$ , 400 MHz,  $\text{CDCl}_3$

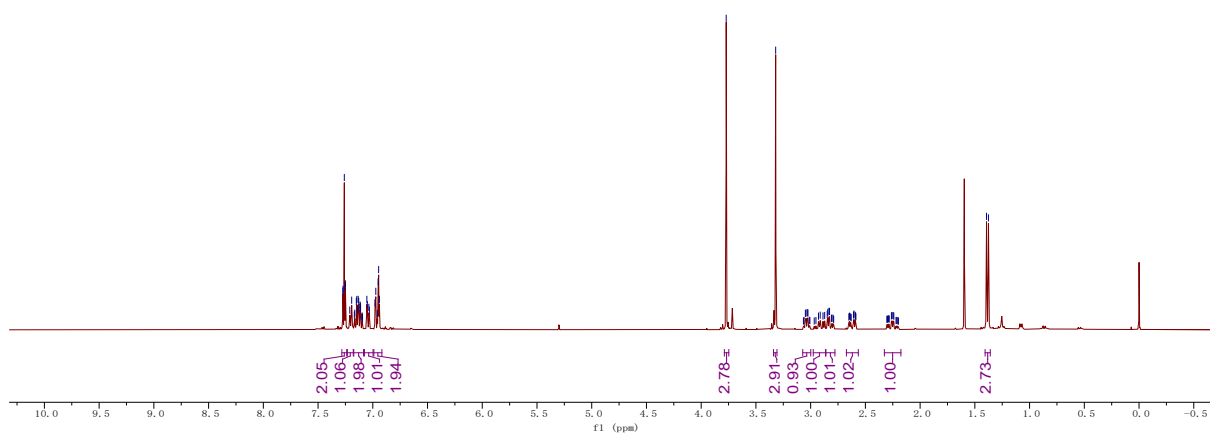

172.556  
155.531  
140.226  
136.494  
136.030  
134.904  
132.776  
130.730  
127.462  
126.727  
126.277  
126.240  
123.358  
115.319  
113.278  
77.249  
77.037  
76.821  
55.619  
40.130  
35.685  
28.152  
23.432  
12.672

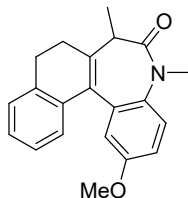

$^{13}\text{C NMR}$ , 150 MHz,  $\text{CDCl}_3$

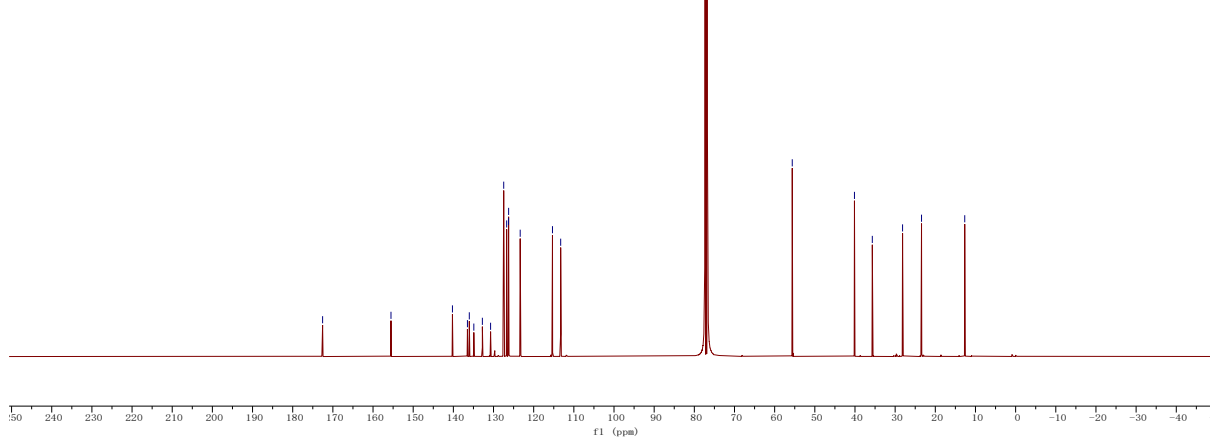



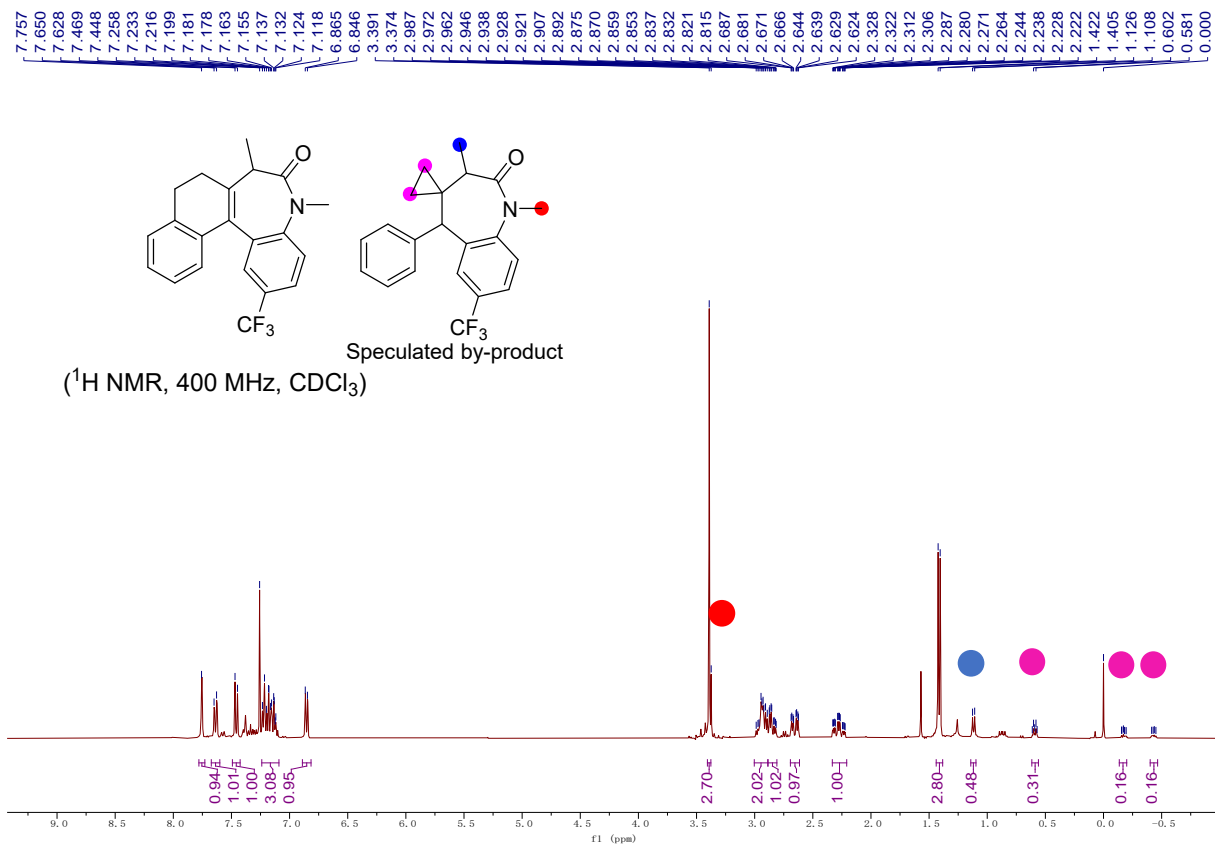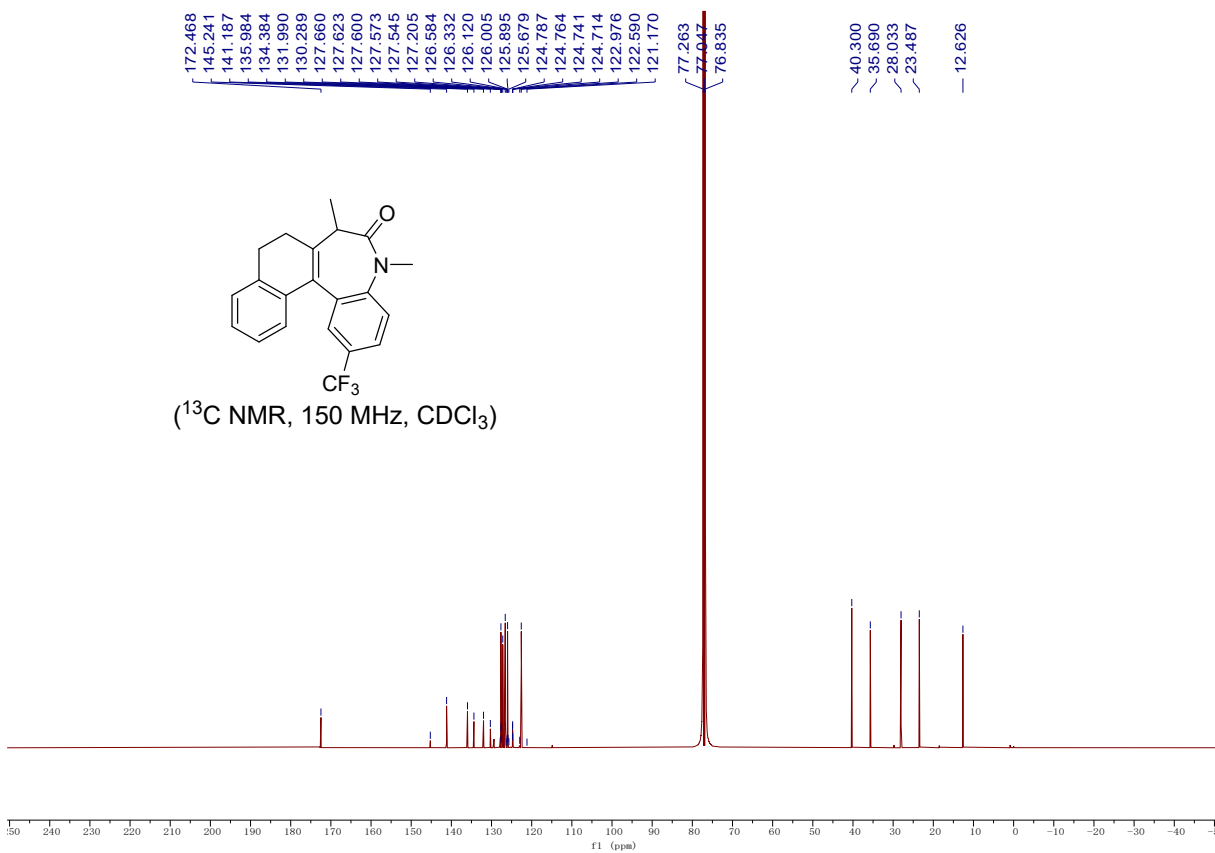

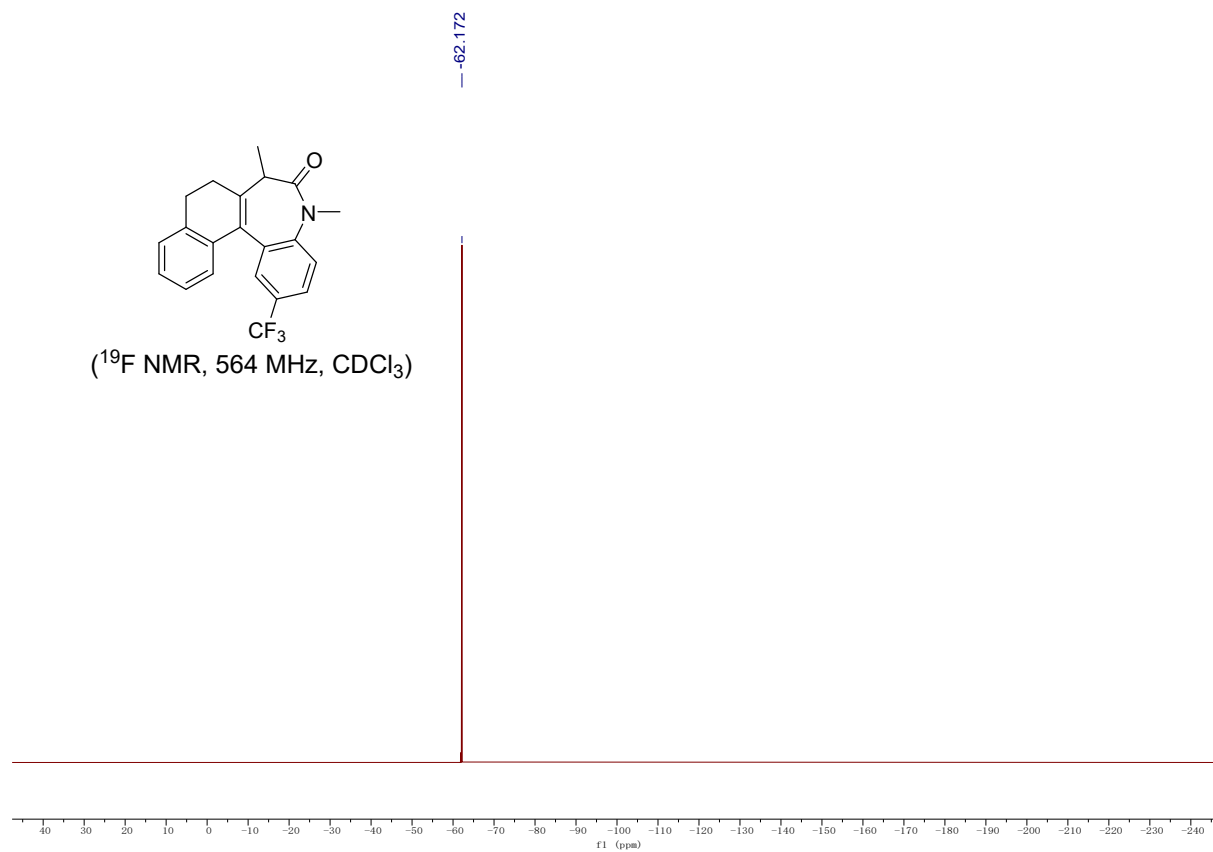

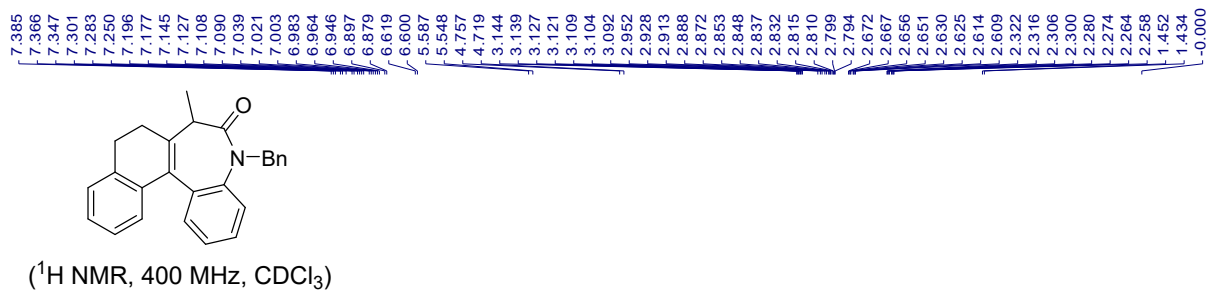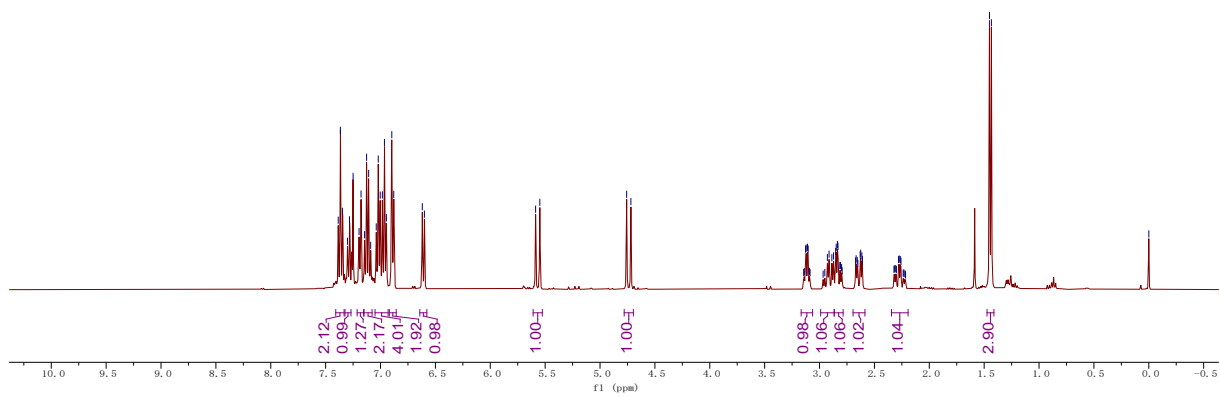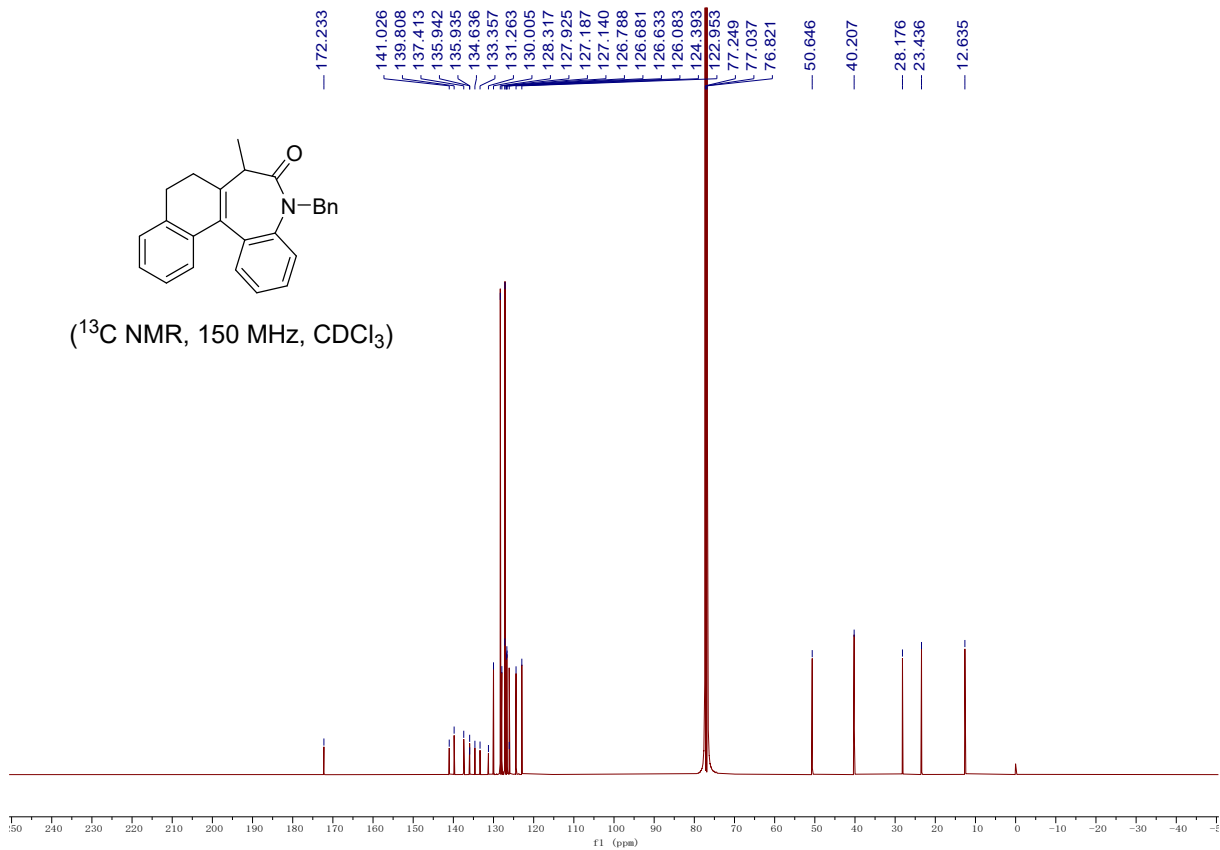

7.452  
7.434  
7.391  
7.389  
7.384  
7.377  
7.373  
7.212  
7.206  
7.198  
7.192  
7.187  
7.178  
7.157  
7.142  
7.138  
7.125  
7.120  
7.115  
7.102  
7.100  
7.096  
6.943  
6.924  
4.985  
4.970  
4.966  
4.951  
3.543  
3.536  
3.522  
2.998  
2.992  
2.981  
2.975  
2.906  
2.842  
2.831  
2.596  
1.993  
1.975  
1.375  
1.323  
1.310  
1.310  
1.307  
1.302  
1.294  
1.290  
1.287  
1.275  
1.271  
1.258  
1.236  
1.038  
1.035  
1.023  
1.020  
1.017  
1.012  
1.009  
1.004  
0.994  
0.661  
0.643  
0.625  
0.000

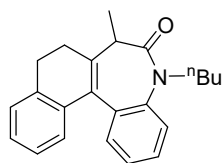

(<sup>1</sup>H NMR, 400 MHz, CDCl<sub>3</sub>)

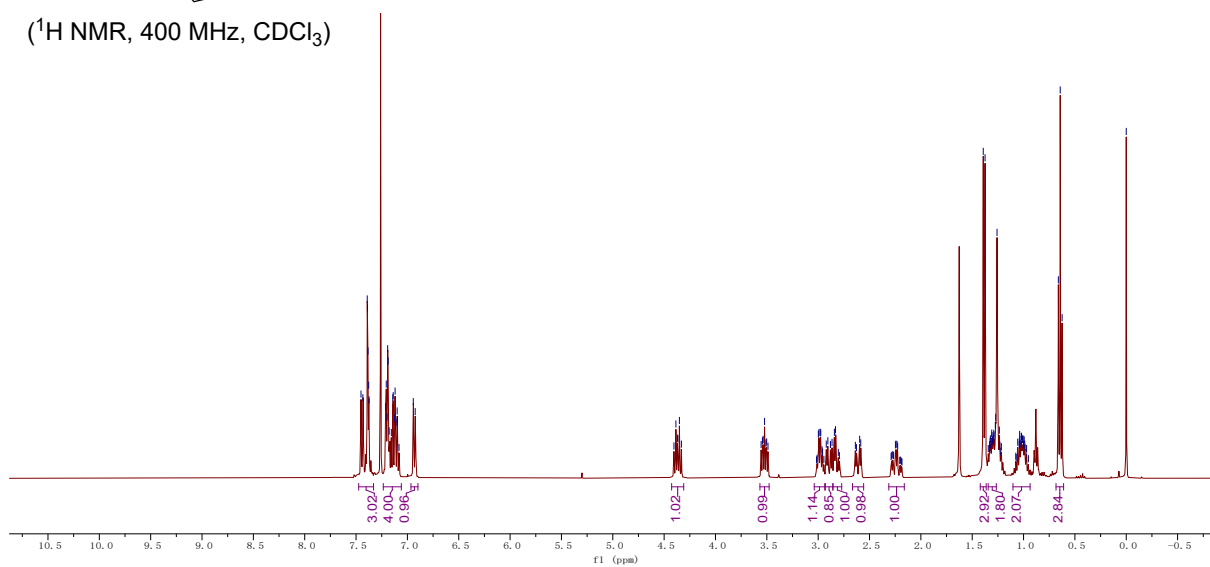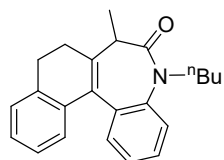

(<sup>13</sup>C NMR, 150 MHz, CDCl<sub>3</sub>)

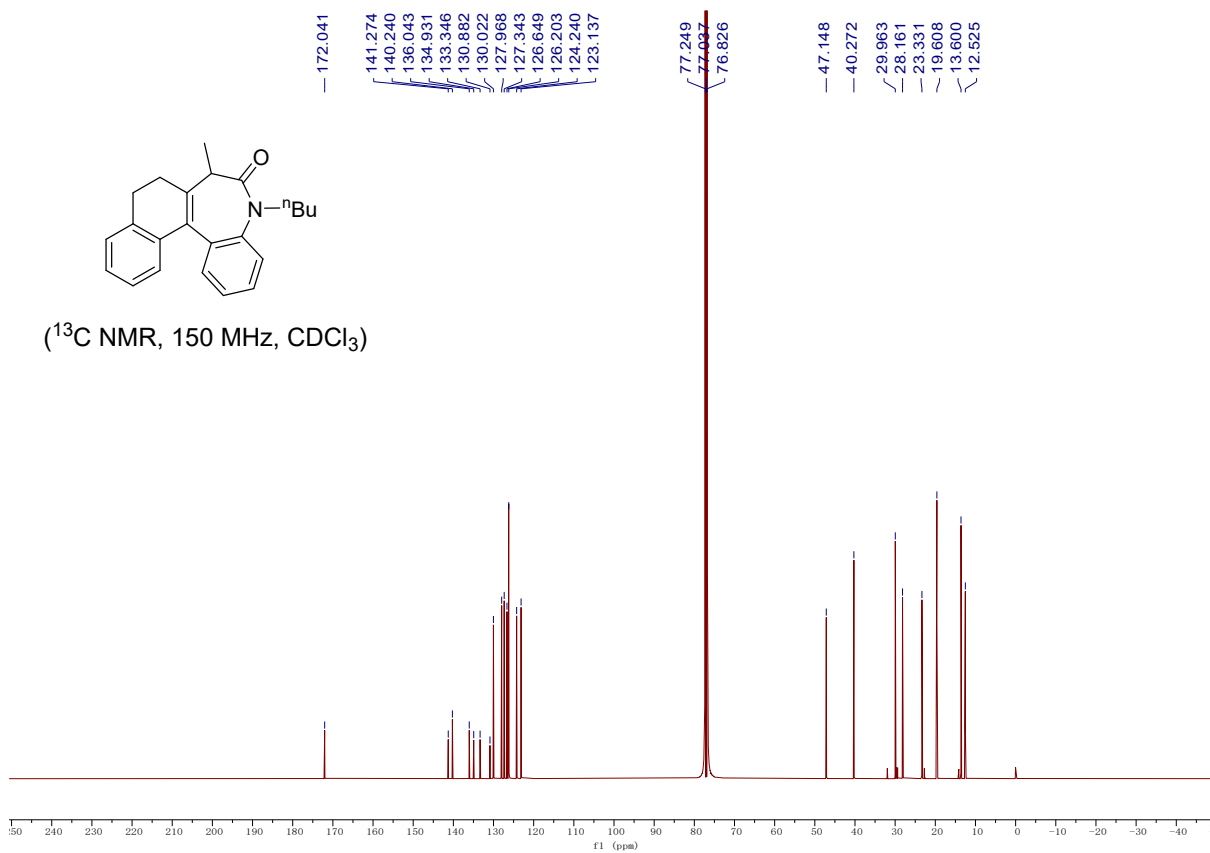

7.447  
7.443  
7.427  
7.423  
7.411  
7.408  
7.391  
7.387  
7.361  
7.357  
7.344  
7.340  
7.323  
7.319  
7.247  
7.244  
7.228  
7.225  
7.210  
7.206  
7.190  
7.164  
7.160  
7.145  
7.141  
7.128  
7.123  
7.110  
7.105  
7.091  
7.087  
6.979  
6.961  
4.594  
4.577  
4.560  
4.542  
2.994  
2.988  
2.976  
2.970  
2.952  
2.913  
2.897  
2.872  
2.857  
2.849  
2.844  
2.833  
2.827  
2.618  
2.603  
2.577  
2.566  
2.266  
2.260  
2.250  
2.244  
2.244  
1.429  
1.412  
1.376  
1.358  
1.004  
0.986  
0.000

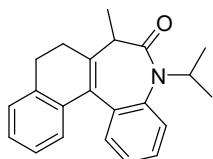

(<sup>1</sup>H NMR, 400 MHz, CDCl<sub>3</sub>)

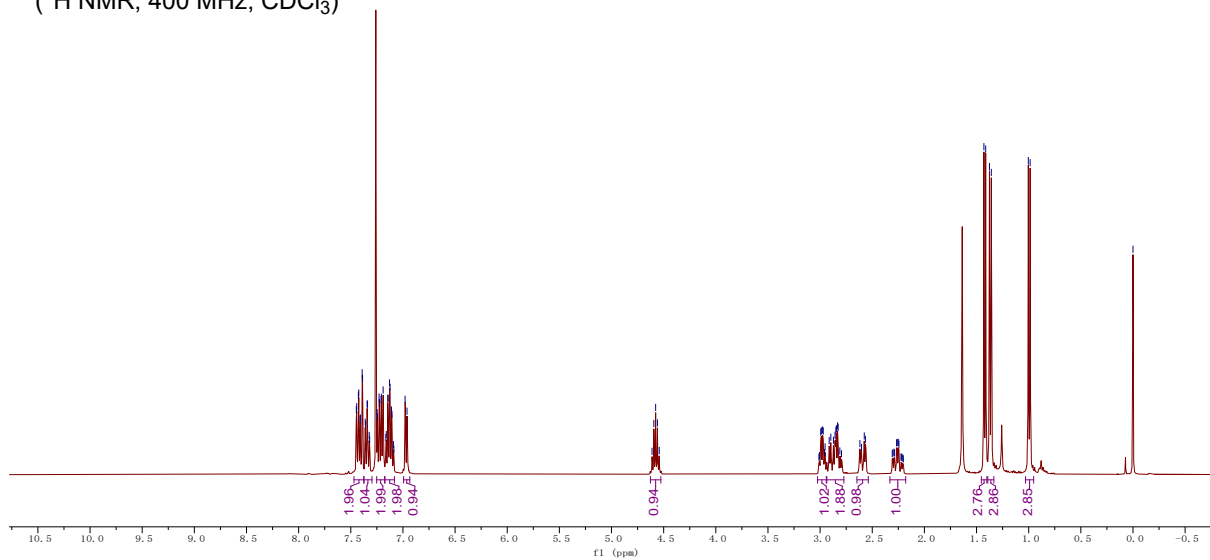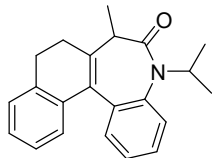

(<sup>13</sup>C NMR, 150 MHz, CDCl<sub>3</sub>)

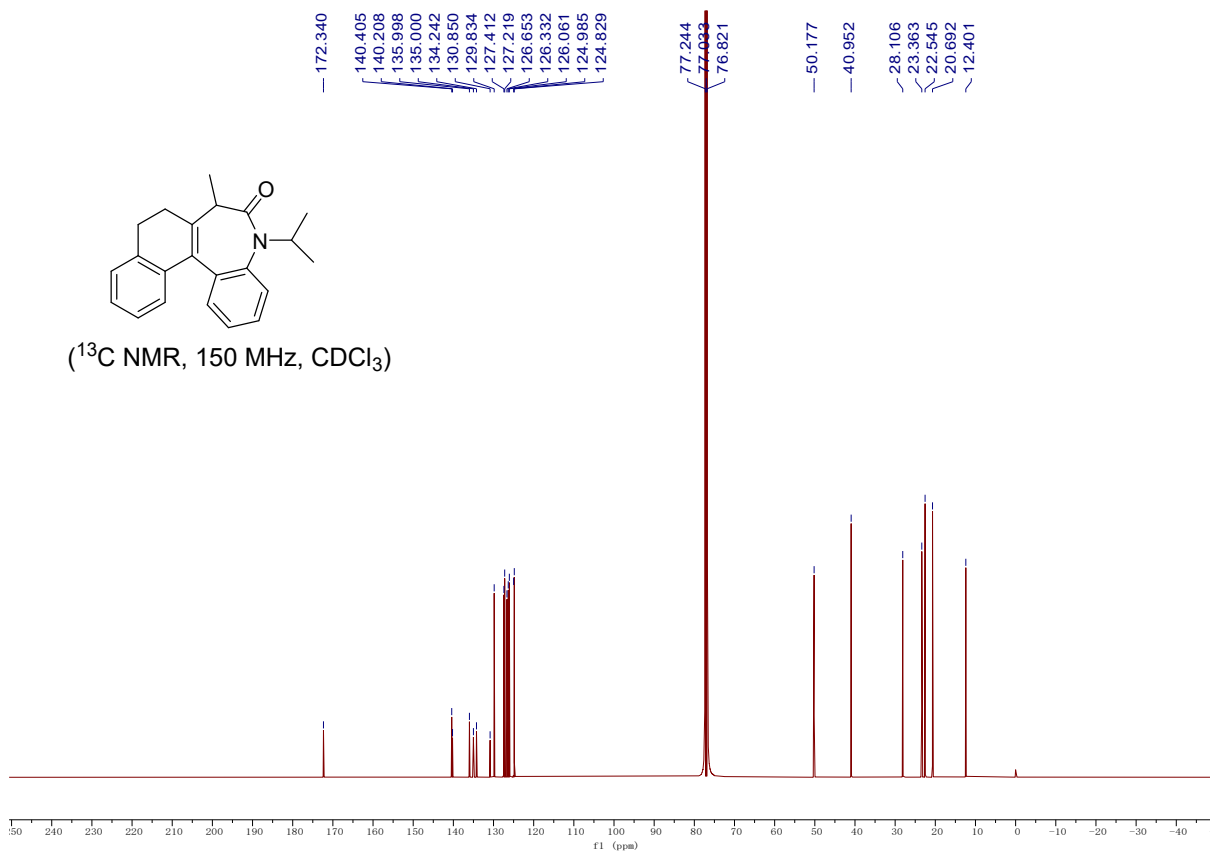

7.452  
7.433  
7.389  
7.383  
7.379  
7.375  
7.216  
7.208  
7.189  
7.175  
7.162  
7.140  
7.122  
7.103  
7.082  
6.953  
6.939  
4.333  
4.315  
4.298  
4.280  
4.280  
3.624  
3.606  
3.589  
3.572  
3.007  
2.995  
2.989  
2.977  
2.971  
2.960  
2.953  
2.923  
2.908  
2.882  
2.867  
2.845  
2.834  
2.807  
2.796  
2.796  
2.636  
2.620  
2.599  
2.583  
2.300  
2.294  
2.284  
2.278  
2.259  
2.252  
2.243  
2.236  
1.398  
1.380  
1.160  
1.142  
1.124  
1.102  
1.083  
0.946  
0.928  
0.911  
0.550  
0.529  
-0.000

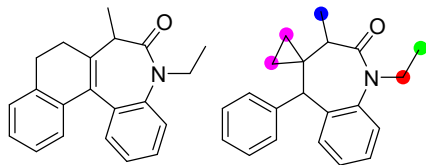

Speculated by-product

(<sup>1</sup>H NMR, 400 MHz, CDCl<sub>3</sub>)

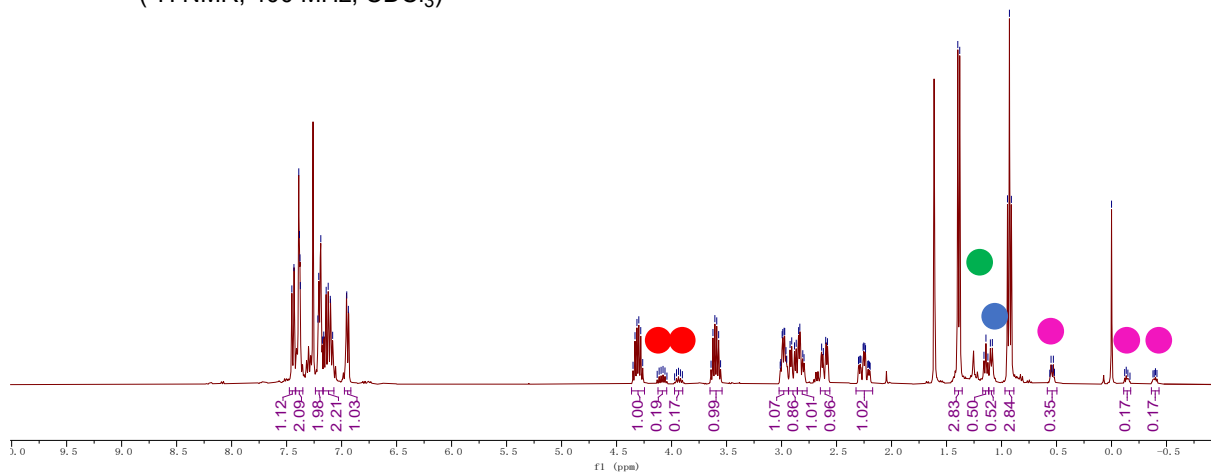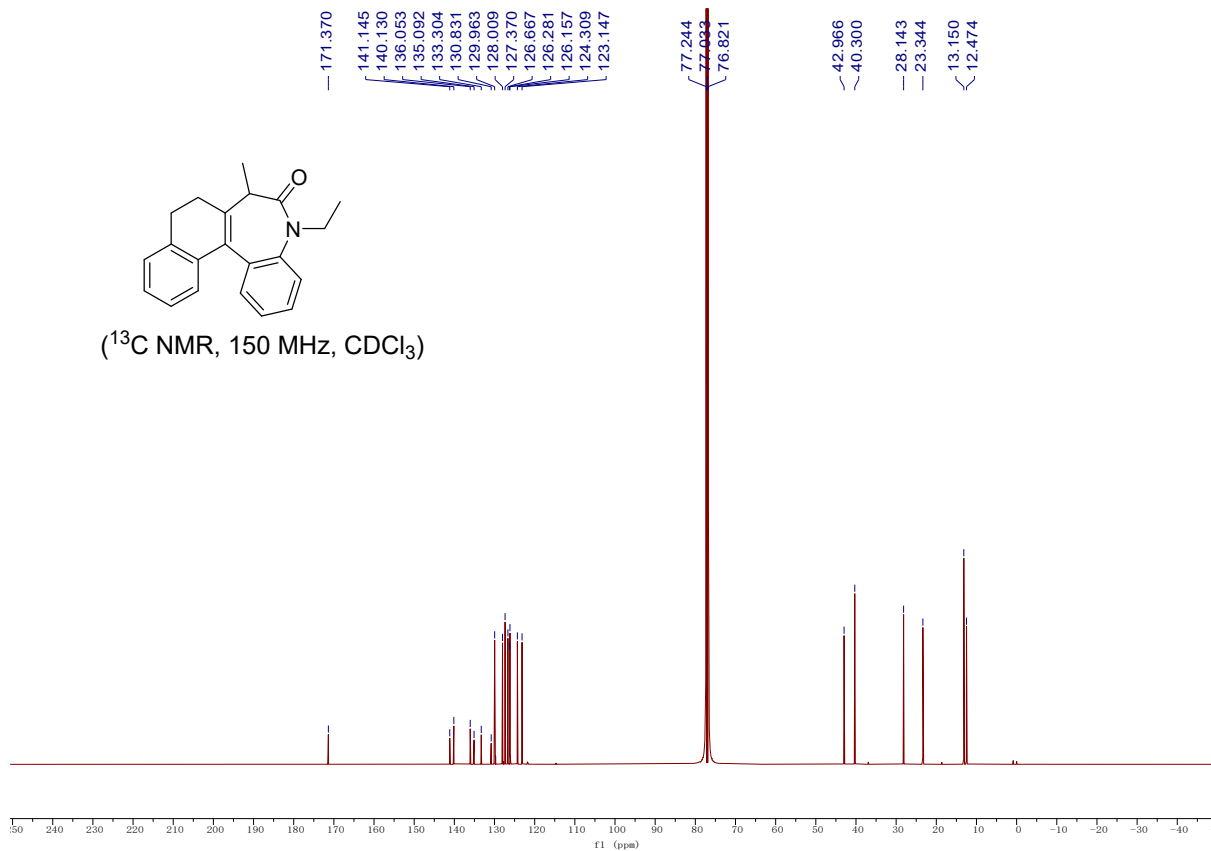

(<sup>13</sup>C NMR, 150 MHz, CDCl<sub>3</sub>)

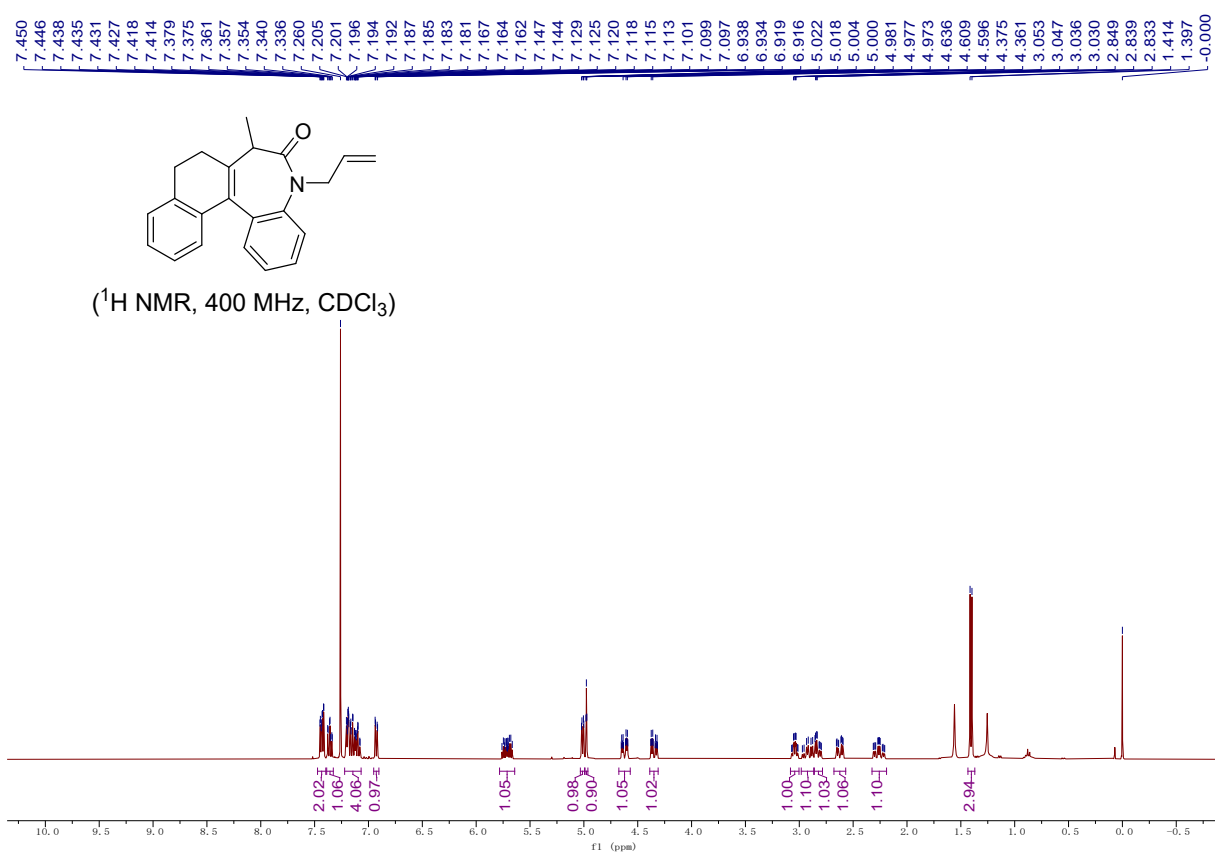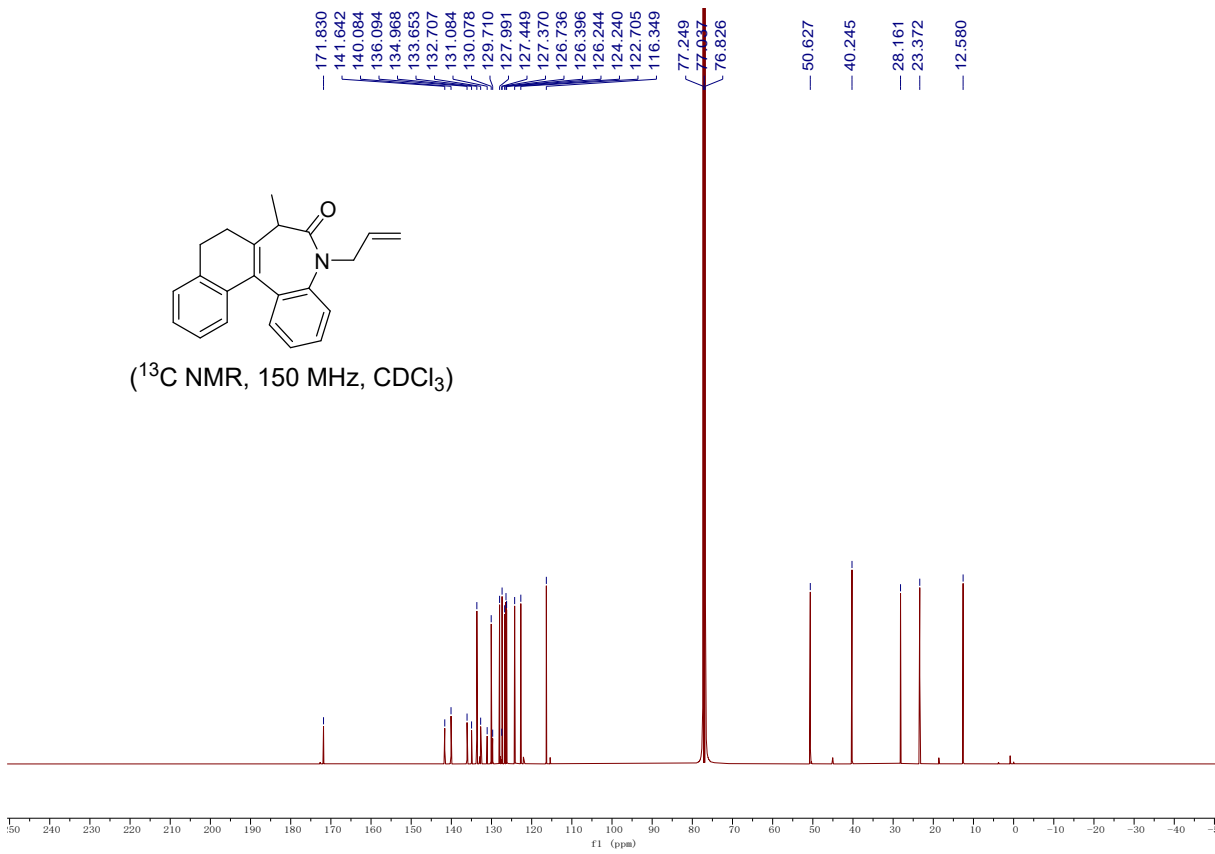

7.490  
7.487  
7.477  
7.474  
7.431  
7.428  
7.419  
7.417  
7.416  
7.414  
7.405  
7.402  
7.296  
7.294  
7.282  
7.280  
7.262  
7.254  
7.252  
7.242  
7.239  
7.229  
7.227  
7.218  
7.216  
7.214  
7.205  
7.203  
7.193  
7.191  
7.181  
7.179  
7.154  
7.152  
7.150  
7.141  
7.139  
7.137  
7.128  
7.126  
7.046  
7.044  
7.033  
7.031  
3.240  
3.236  
3.228  
3.224  
2.940  
2.930  
2.902  
2.878  
2.875  
2.868  
2.864  
2.639  
2.614  
2.611  
2.604  
2.326  
2.322  
2.316  
1.483  
1.482  
-0.000

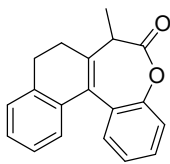

(<sup>1</sup>H NMR, 600 MHz, CDCl<sub>3</sub>)

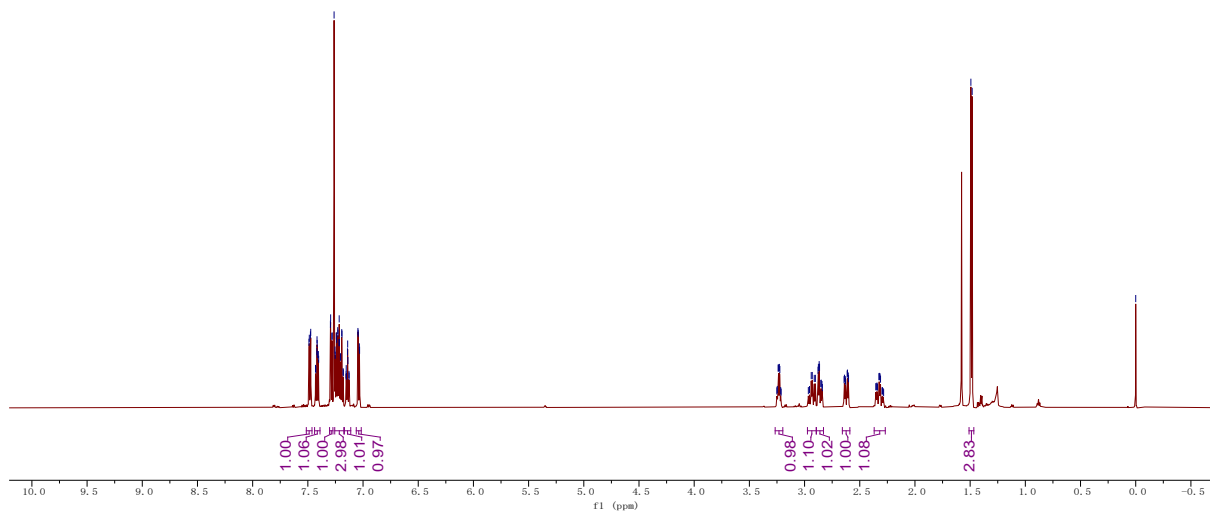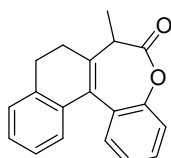

(<sup>13</sup>C NMR, 150 MHz, CDCl<sub>3</sub>)

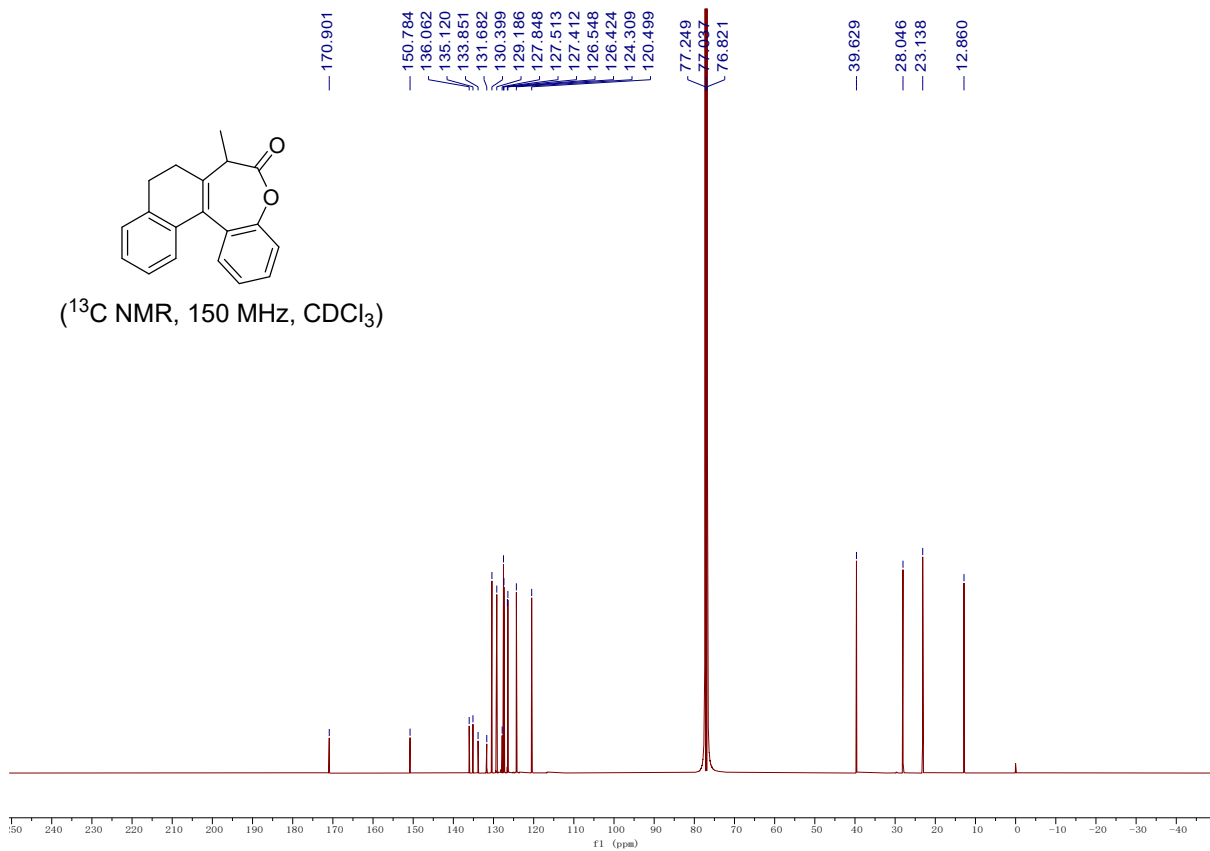



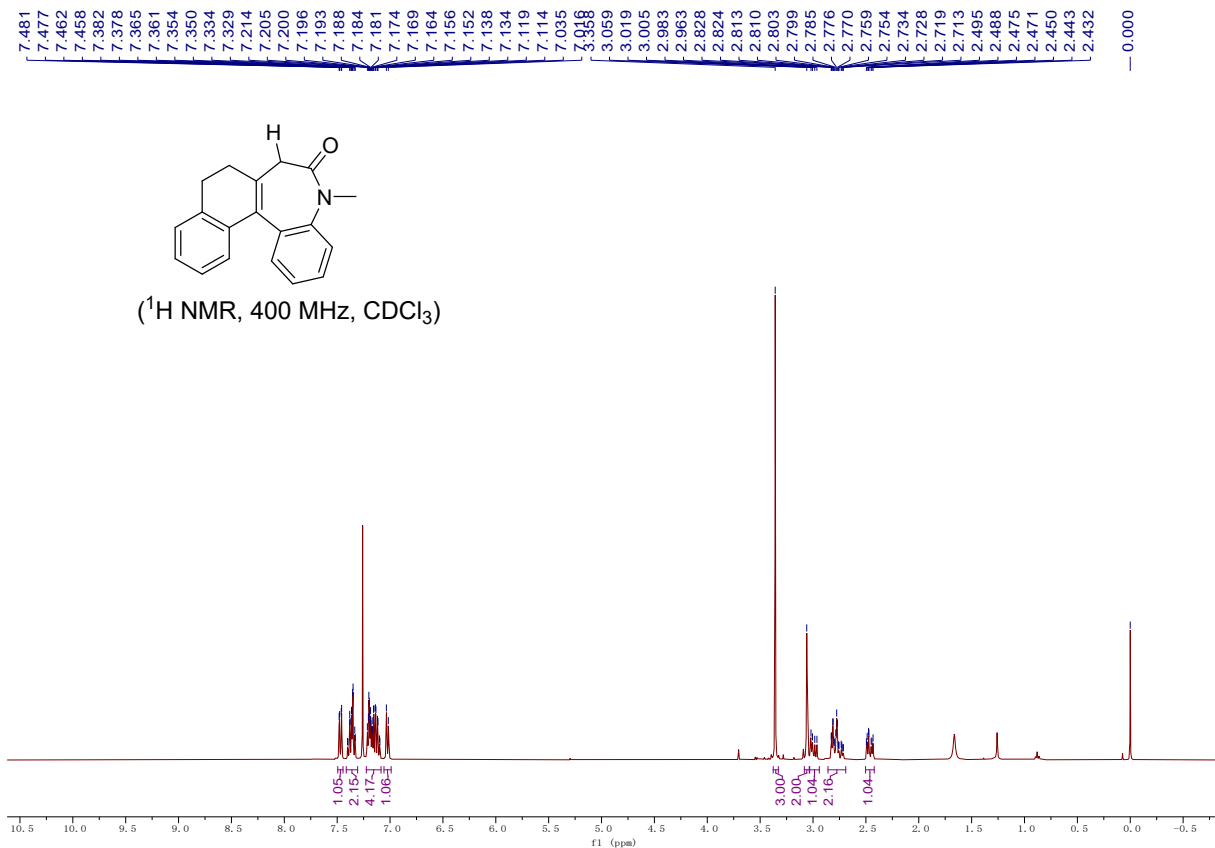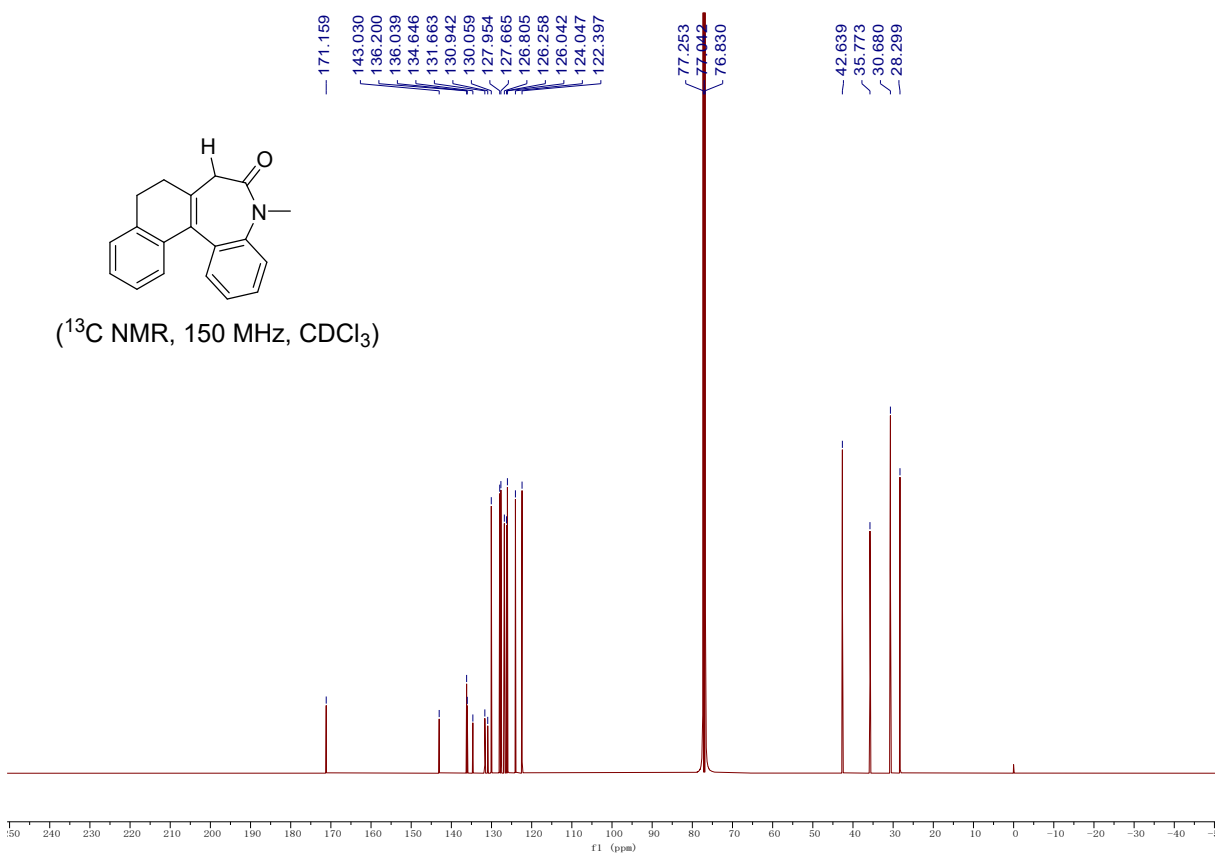

7.487  
7.483  
7.468  
7.464  
7.405  
7.401  
7.388  
7.384  
7.378  
7.374  
7.358  
7.219  
7.215  
7.203  
7.199  
7.195  
7.189  
7.183  
7.178  
7.160  
7.157  
7.142  
7.138  
7.124  
7.119  
7.113  
7.100  
6.962  
6.958  
6.944  
6.940  
3.370  
3.363  
2.931  
2.916  
2.890  
2.875  
2.847  
2.826  
2.715  
2.709  
2.704  
2.693  
2.552  
2.536  
2.264  
2.258  
2.248  
2.101  
2.085  
2.080  
2.067  
2.064  
2.046  
1.868  
1.851  
1.834  
1.816  
0.951  
0.933  
0.915  
0.811  
0.797  
-0.778  
-0.000

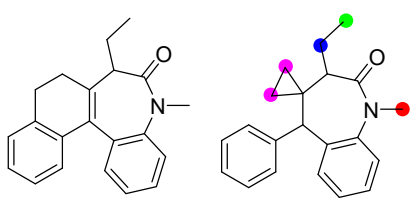

Speculated by-product

(<sup>1</sup>H NMR, 400 MHz, CDCl<sub>3</sub>)

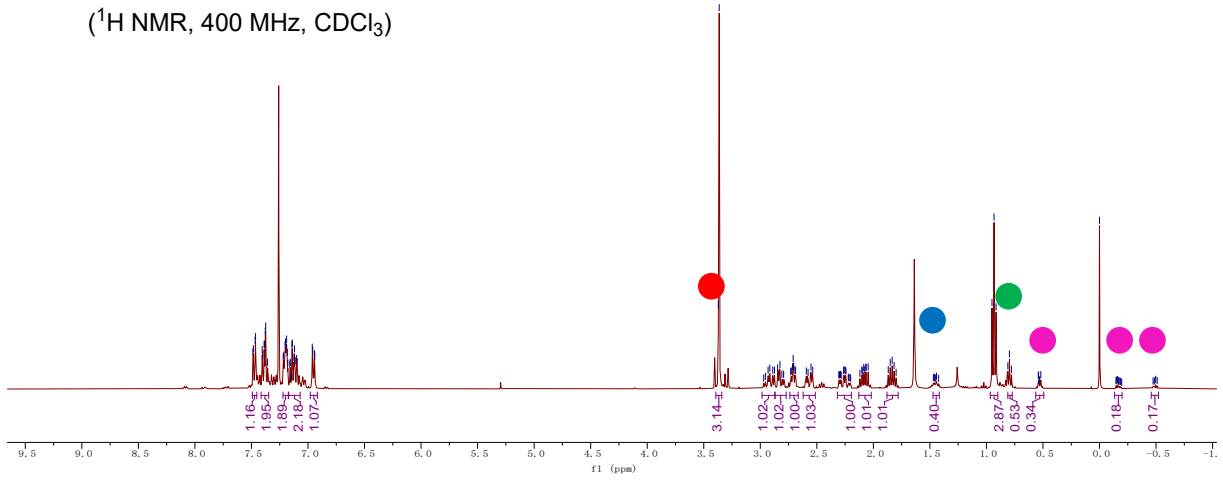

(<sup>13</sup>C NMR, 150 MHz, CDCl<sub>3</sub>)

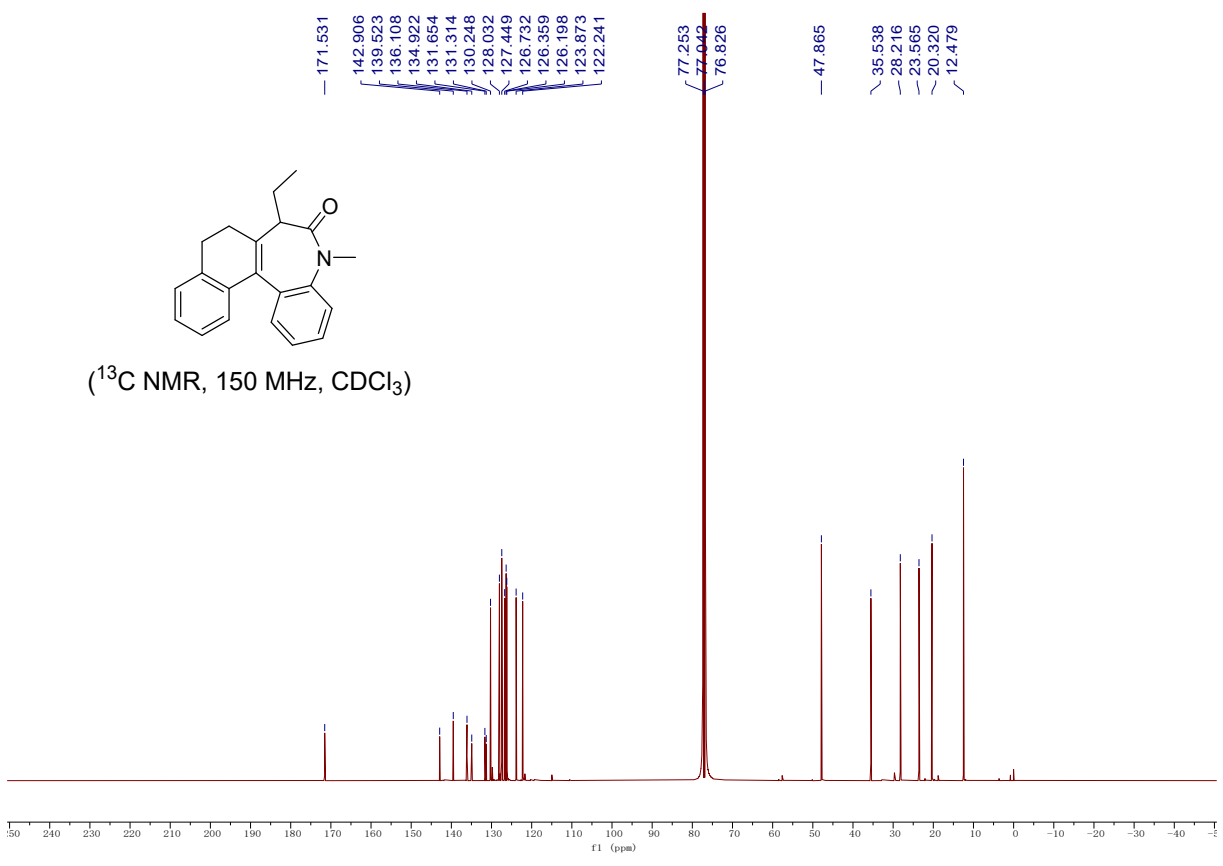

7.478  
7.459  
7.428  
7.421  
7.401  
7.397  
7.384  
7.380  
7.368  
7.351  
7.211  
7.207  
7.198  
7.191  
7.179  
7.160  
7.156  
7.142  
7.138  
7.119  
7.113  
7.094  
6.960  
6.941  
3.360  
3.355  
2.931  
2.917  
2.890  
2.876  
2.847  
2.842  
2.832  
2.826  
2.794  
2.789  
2.778  
2.773  
2.768  
2.756  
2.751  
2.596  
2.555  
2.544  
2.262  
2.252  
2.070  
2.043  
1.370  
1.357  
1.349  
1.339  
1.333  
1.330  
1.202  
1.196  
1.190  
1.175  
1.168  
1.158  
0.915  
0.887  
0.880  
0.000

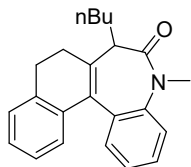

(<sup>1</sup>H NMR, 400 MHz, CDCl<sub>3</sub>)

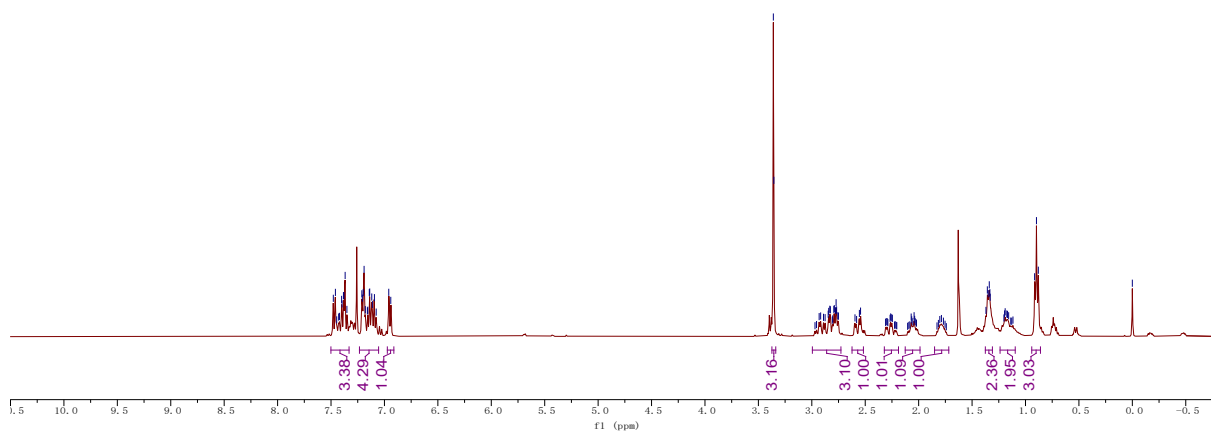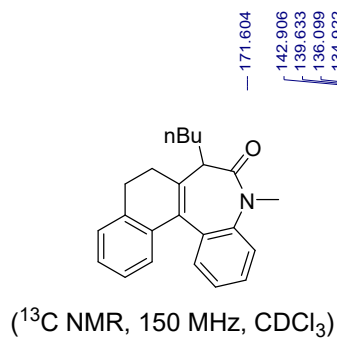

(<sup>13</sup>C NMR, 150 MHz, CDCl<sub>3</sub>)

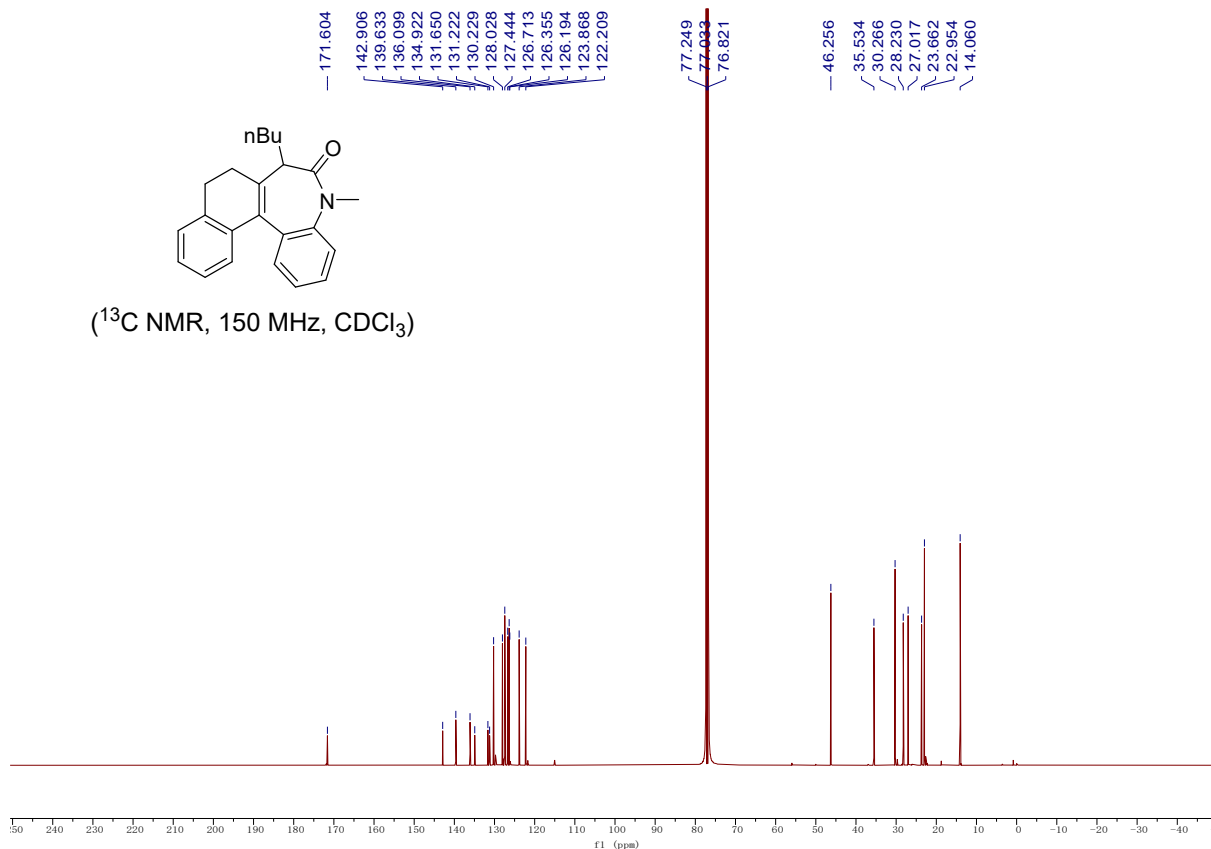

7.516  
7.496  
7.415  
7.411  
7.394  
7.390  
7.376  
7.372  
7.338  
7.317  
7.254  
7.232  
7.214  
7.201  
7.184  
7.168  
7.163  
7.155  
7.137  
7.119  
7.102  
7.083  
6.971  
6.952  
3.443  
3.430  
3.412  
3.399  
3.349  
3.303  
3.298  
3.285  
3.280  
3.266  
3.234  
3.223  
3.216  
2.806  
2.792  
2.767  
2.750  
2.729  
2.723  
2.712  
2.610  
2.603  
2.596  
2.589  
2.569  
2.563  
2.554  
2.548  
2.381  
2.375  
2.362  
2.354  
2.339  
2.335  
2.322  
2.318  
2.298  
2.294  
2.282  
2.279  
0.000

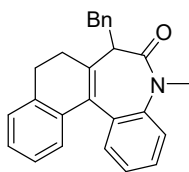

(<sup>1</sup>H NMR, 400 MHz, CDCl<sub>3</sub>)

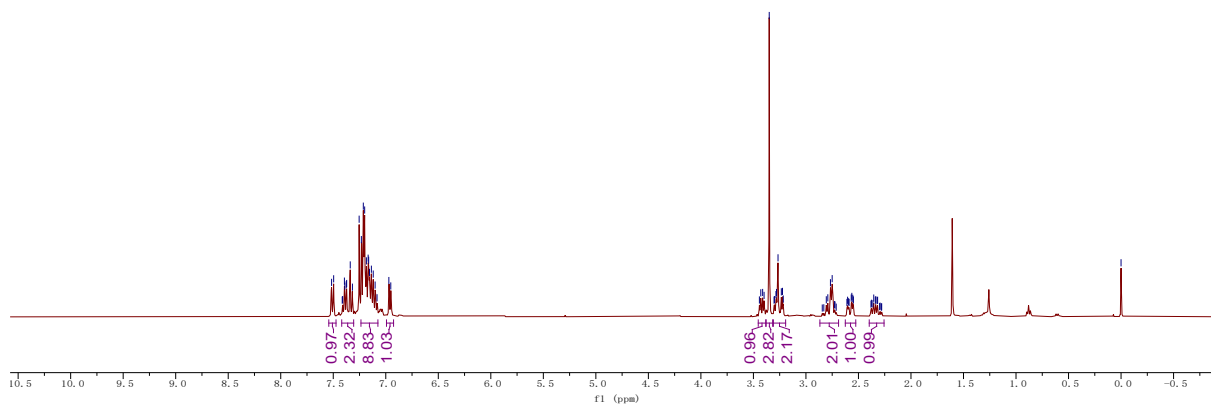

170.947  
142.763  
139.766  
139.013  
136.076  
134.770  
131.507  
130.229  
128.708  
128.340  
128.207  
127.476  
126.883  
126.428  
126.231  
126.010  
124.047  
122.356  
77.253  
77.042  
76.830  
46.399  
35.694  
32.564  
28.120  
23.905

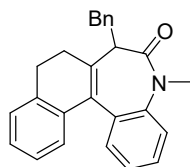

(<sup>13</sup>C NMR, 150 MHz, CDCl<sub>3</sub>)

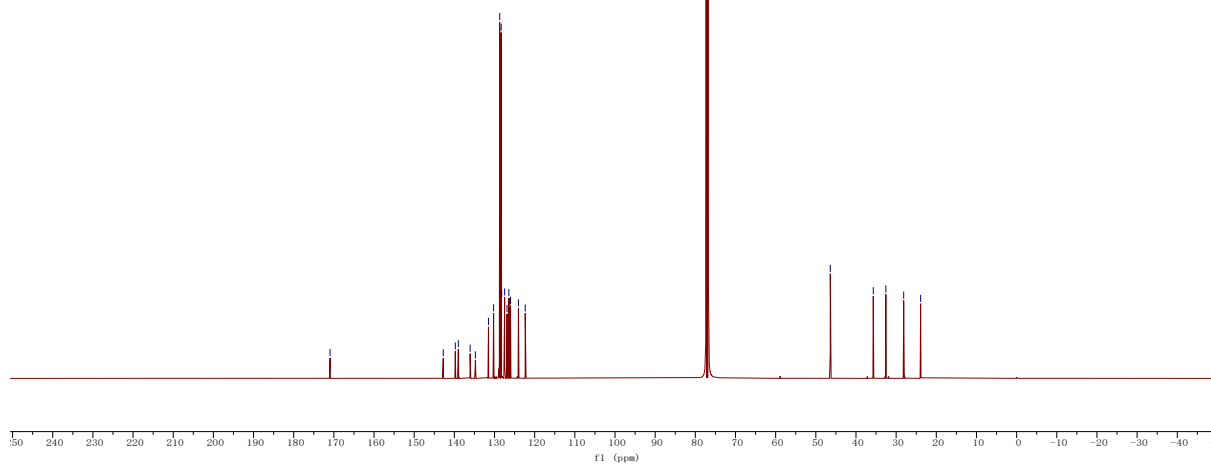

7.451  
7.448  
7.438  
7.435  
7.380  
7.378  
7.376  
7.367  
7.364  
7.344  
7.342  
7.339  
7.331  
7.323  
7.321  
7.292  
7.288  
7.286  
7.284  
7.282  
7.277  
7.258  
7.201  
7.189  
7.178  
7.166  
7.164  
7.158  
7.156  
7.146  
7.143  
7.133  
7.131  
7.110  
7.108  
7.106  
7.098  
7.096  
7.084  
7.083  
6.952  
6.950  
6.940  
6.937  
4.614  
4.594  
4.580  
4.560  
4.060  
4.044  
4.029  
4.026  
4.015  
4.010  
3.999  
3.344  
3.202  
3.198  
2.806  
2.799  
2.796  
2.513  
2.510  
0.000

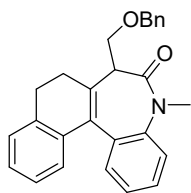

(<sup>1</sup>H NMR, 600 MHz, CDCl<sub>3</sub>)

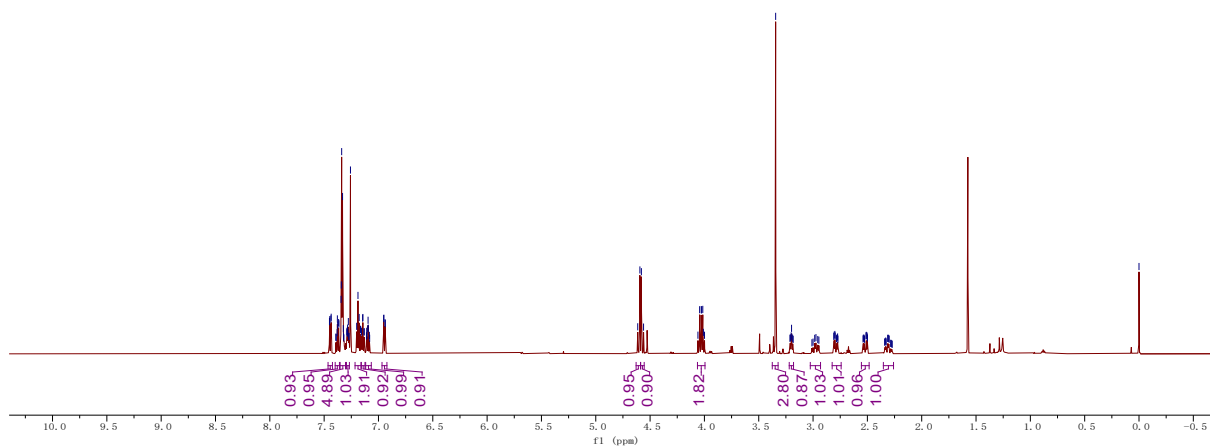

170.313  
142.524  
137.979  
137.556  
136.112  
134.826  
131.792  
131.489  
130.427  
128.446  
128.106  
128.005  
127.789  
127.458  
126.860  
126.350  
126.194  
124.061  
122.269  
77.249  
77.037  
76.826  
73.655  
67.215  
46.252  
35.377  
28.101  
23.795

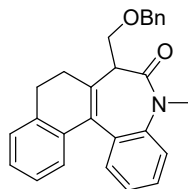

(<sup>13</sup>C NMR, 600 MHz, CDCl<sub>3</sub>)

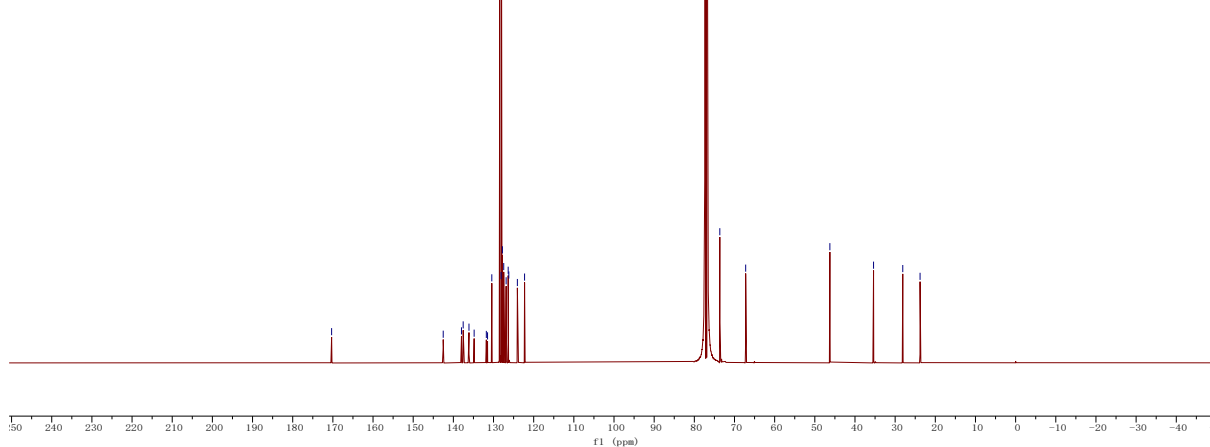

## 12. References

1. T. Constantin, M. Zanini, A. Regni, N. S. Sheikh, F. Juliá and D. Leonori, *Science*, 2020, **367**, 1021-1026.
2. G. J. Choi, Q. Zhu, D. C. Miller, C. J. Gu and R. R. Knowles, *Nature*, 2016, **539**, 268-271.
3. T. Koike and M. Akita, *Inorg. Chem. Front.*, 2014, **1**, 562-576.
4. J. Luo and J. Zhang, *ACS Catal.*, 2016, **6**, 873-877.
5. A. J. Musacchio, B. C. Lainhart, X. Zhang, S. G. Naguib, T. C. Sherwood and R. R. Knowles, *Science*, 2017, **355**, 727-730.
6. N. A. Romero and D. A. Nicewicz, *Chem. Rev.*, 2016, **116**, 10075-10166.
7. C. K. Prier, D. A. Rankic and D. W. C. MacMillan, *Chem. Rev.*, 2013, **113**, 5322-5363.
8. X.-Y. Zhang, C. Ning, Y.-J. Long, Y. Wei and M. Shi, *Org. Lett.*, 2020, **22**, 5212-5216.
9. K. E. DeMeester, H. Liang, M. R. Jensen, Z. S. Jones, E. A. D'Ambrosio, S. L. Scinto, J. Zhou and C. L. Grimes, *J. Am. Chem. Soc.*, 2018, **140**, 9458-9465.
10. R. Di Sanza, T. L. N. Nguyen, N. Iqbal, S. P. Argent, W. Lewis and H. W. Lam, *Chem. Sci.*, 2020, **11**, 2401-2406.
11. T. Constantin, F. Julia, N. S. Sheikh and D. Leonori, *Chem Sci*, 2020, **11**, 12822-12828.
12. X.-Y. Zhang, X.-Y. Wu, B. Zhang, Y. Wei and M. Shi, *ACS Catal.*, 2021, **11**, 4372-4380.
13. L. Buzzetti, G. E. M. Crisenza and P. Melchiorre, *Angew. Chem. Int. Ed.*, 2019, **58**, 3730-3747.
14. M. A. Cismesia and T. P. Yoon, *Chem. Sci.*, 2015, **6**, 5426-5434.
